# Supplementary material
Source: publisher figshare collection journal article supplement (https://acs.figshare.com/ndownloader/files/6503808)
Supplement: Supplementary file 1 [file 6503808]

 
data_shelx
 
_audit_creation_method            'SHELXL-2014/7'
_shelx_SHELXL_version_number      '2014/7'
_chemical_name_systematic         ?
_chemical_name_common             ?
_chemical_melting_point           ?
_chemical_formula_moiety          ?
_chemical_formula_sum
 'C58 H65 N5 O4' 
_chemical_formula_weight          896.15

loop_
 _atom_type_symbol
 _atom_type_description
 _atom_type_scat_dispersion_real
 _atom_type_scat_dispersion_imag
 _atom_type_scat_source
 'C'  'C'   0.0181   0.0091
 'International Tables Vol C Tables 4.2.6.8 and 6.1.1.4'
 'H'  'H'   0.0000   0.0000
 'International Tables Vol C Tables 4.2.6.8 and 6.1.1.4'
 'N'  'N'   0.0311   0.0180
 'International Tables Vol C Tables 4.2.6.8 and 6.1.1.4'
 'O'  'O'   0.0492   0.0322
 'International Tables Vol C Tables 4.2.6.8 and 6.1.1.4'
 
_space_group_crystal_system       monoclinic
_space_group_IT_number            14
_space_group_name_H-M_alt         'P 21/n'
_space_group_name_Hall            '-P 2yn'
 
_shelx_space_group_comment
;
The symmetry employed for this shelxl refinement is uniquely defined
by the following loop, which should always be used as a source of
symmetry information in preference to the above space-group names.
They are only intended as comments.
;
 
loop_
 _space_group_symop_operation_xyz
 'x, y, z'
 '-x+1/2, y+1/2, -z+1/2'
 '-x, -y, -z'
 'x-1/2, -y-1/2, z-1/2'
 
_cell_length_a                    20.878(3)
_cell_length_b                    11.7961(13)
_cell_length_c                    21.677(3)
_cell_angle_alpha                 90
_cell_angle_beta                  110.666(5)
_cell_angle_gamma                 90
_cell_volume                      4995.1(11)
_cell_formula_units_Z             4
_cell_measurement_temperature     100(2)
_cell_measurement_reflns_used           4358
_cell_measurement_theta_min             2.5
_cell_measurement_theta_max             68.9
 
_exptl_crystal_description        'block'
_exptl_crystal_colour             'colourless'
_exptl_crystal_density_meas       ?
_exptl_crystal_density_method     ?
_exptl_crystal_density_diffrn     1.192          
_exptl_crystal_F_000              1920
_exptl_transmission_factor_min    ?
_exptl_transmission_factor_max    ?
_exptl_crystal_size_max           0.200
_exptl_crystal_size_mid           0.146
_exptl_crystal_size_min           0.078
_exptl_absorpt_coefficient_mu     0.588
_shelx_estimated_absorpt_T_min    0.892
_shelx_estimated_absorpt_T_max    0.956
_exptl_absorpt_correction_type          'Numerical'
_exptl_absorpt_correction_T_max         1.000
_exptl_absorpt_correction_T_min         0.680
_exptl_absorpt_process_details    ?
_exptl_absorpt_special_details    ?
_diffrn_ambient_temperature       100(2)
_diffrn_radiation_wavelength      1.54178
_diffrn_radiation_type            CuK\a
_diffrn_source                    ?
_diffrn_measurement_device_type   'Rigaku Saturn944+ (2x2 bin mode)'
_diffrn_measurement_method        ?
_diffrn_detector_area_resol_mean  ?
_diffrn_reflns_number             34835
_diffrn_reflns_av_unetI/netI      0.0797
_diffrn_reflns_av_R_equivalents   0.0986
_diffrn_reflns_limit_h_min        -25
_diffrn_reflns_limit_h_max        23
_diffrn_reflns_limit_k_min        -14
_diffrn_reflns_limit_k_max        13
_diffrn_reflns_limit_l_min        -23
_diffrn_reflns_limit_l_max        26
_diffrn_reflns_theta_min          2.527
_diffrn_reflns_theta_max          68.905
_diffrn_reflns_theta_full         67.679
_diffrn_measured_fraction_theta_max   0.982
_diffrn_measured_fraction_theta_full  0.993
_diffrn_reflns_Laue_measured_fraction_max    0.982
_diffrn_reflns_Laue_measured_fraction_full   0.993
_diffrn_reflns_point_group_measured_fraction_max   0.982
_diffrn_reflns_point_group_measured_fraction_full  0.993
_reflns_number_total              9102
_reflns_number_gt                 5218
_reflns_threshold_expression      'I > 2\s(I)'
_reflns_Friedel_coverage          0.000
_reflns_Friedel_fraction_max      .
_reflns_Friedel_fraction_full     .
 
_reflns_special_details
;
 Reflections were merged by SHELXL according to the crystal
 class for the calculation of statistics and refinement.
 
 _reflns_Friedel_fraction is defined as the number of unique
 Friedel pairs measured divided by the number that would be
 possible theoretically, ignoring centric projections and
 systematic absences.
;
 
_computing_data_collection        ?
_computing_cell_refinement        ?
_computing_data_reduction         ?
_computing_structure_solution     ?
_computing_structure_refinement 'SHELXL-2014/7 (Sheldrick, 2014)'
_computing_molecular_graphics     ?
_computing_publication_material   ?
_refine_special_details           ?
_refine_ls_structure_factor_coef  Fsqd
_refine_ls_matrix_type            full
_refine_ls_weighting_scheme       calc
_refine_ls_weighting_details
'w=1/[\s^2^(Fo^2^)+(0.0705P)^2^] where P=(Fo^2^+2Fc^2^)/3'
_atom_sites_solution_primary      ?
_atom_sites_solution_secondary    ?
_atom_sites_solution_hydrogens    geom
_refine_ls_hydrogen_treatment     constr
_refine_ls_extinction_method      none
_refine_ls_extinction_coef        .
_refine_ls_number_reflns          9102
_refine_ls_number_parameters      643
_refine_ls_number_restraints      0
_refine_ls_R_factor_all           0.1121
_refine_ls_R_factor_gt            0.0542
_refine_ls_wR_factor_ref          0.1484
_refine_ls_wR_factor_gt           0.1239
_refine_ls_goodness_of_fit_ref    0.981
_refine_ls_restrained_S_all       0.981
_refine_ls_shift/su_max           0.001
_refine_ls_shift/su_mean          0.000
 
loop_
 _atom_site_label
 _atom_site_type_symbol
 _atom_site_fract_x
 _atom_site_fract_y
 _atom_site_fract_z
 _atom_site_U_iso_or_equiv
 _atom_site_adp_type
 _atom_site_occupancy
 _atom_site_site_symmetry_order  
 _atom_site_calc_flag
 _atom_site_refinement_flags_posn
 _atom_site_refinement_flags_adp
 _atom_site_refinement_flags_occupancy
 _atom_site_disorder_assembly
 _atom_site_disorder_group
C1 C 0.13555(11) 0.45759(19) -0.33369(11) 0.0328(5) Uani 1 1 d . . . . .
C2 C 0.13378(14) 0.4642(2) -0.39818(13) 0.0443(6) Uani 1 1 d . . . . .
H2 H 0.1605 0.4157 -0.4128 0.053 Uiso 1 1 calc R U . . .
C3 C 0.09221(15) 0.5432(2) -0.44039(13) 0.0496(7) Uani 1 1 d . . . . .
H3 H 0.0904 0.5482 -0.4838 0.059 Uiso 1 1 calc R U . . .
C4 C 0.05360(14) 0.6141(2) -0.41757(12) 0.0446(6) Uani 1 1 d . . . . .
H4 H 0.0252 0.6681 -0.4452 0.053 Uiso 1 1 calc R U . . .
C5 C 0.05762(12) 0.6041(2) -0.35293(12) 0.0364(6) Uani 1 1 d . . . . .
C6 C 0.01634(14) 0.6763(2) -0.32398(14) 0.0449(7) Uani 1 1 d . . . . .
H6A H -0.0284 0.6424 -0.3329 0.054 Uiso 1 1 calc R U . . .
H6B H 0.0391 0.6811 -0.2766 0.054 Uiso 1 1 calc R U . . .
C7 C -0.03727(16) 0.8548(2) -0.33192(14) 0.0549(8) Uani 1 1 d . . . . .
H7A H -0.0816 0.8177 -0.3457 0.066 Uiso 1 1 calc R U . . .
H7B H -0.0432 0.9273 -0.3544 0.066 Uiso 1 1 calc R U . . .
C8 C -0.01338(14) 0.8754(2) -0.25859(14) 0.0460(7) Uani 1 1 d . . . . .
C9 C -0.05626(14) 0.8571(2) -0.22373(13) 0.0446(6) Uani 1 1 d . . . . .
H9 H -0.1005 0.8313 -0.2461 0.054 Uiso 1 1 calc R U . . .
C10 C -0.03573(14) 0.8756(2) -0.15661(14) 0.0460(7) Uani 1 1 d . . . . .
H10 H -0.0660 0.8635 -0.1344 0.055 Uiso 1 1 calc R U . . .
C11 C 0.03028(14) 0.9122(2) -0.12275(13) 0.0443(6) Uani 1 1 d . . . . .
C12 C 0.07426(15) 0.9323(2) -0.15660(15) 0.0520(7) Uani 1 1 d . . . . .
H12 H 0.1185 0.9583 -0.1342 0.062 Uiso 1 1 calc R U . . .
C13 C 0.05251(16) 0.9139(2) -0.22335(16) 0.0563(8) Uani 1 1 d . . . . .
H13 H 0.0825 0.9274 -0.2456 0.068 Uiso 1 1 calc R U . . .
C14 C 0.02911(14) 0.8624(2) -0.01558(13) 0.0485(7) Uani 1 1 d . . . . .
H14A H 0.0154 0.7883 -0.0353 0.058 Uiso 1 1 calc R U . . .
H14B H -0.0107 0.8997 -0.0117 0.058 Uiso 1 1 calc R U . . .
C15 C 0.08438(14) 0.8506(3) 0.05137(14) 0.0595(8) Uani 1 1 d . . . . .
H15A H 0.0904 0.9230 0.0740 0.071 Uiso 1 1 calc R U . . .
H15B H 0.1272 0.8318 0.0456 0.071 Uiso 1 1 calc R U . . .
C16 C 0.06879(15) 0.7603(3) 0.09439(14) 0.0698(10) Uani 1 1 d . . . . .
H16A H 0.1009 0.7685 0.1391 0.084 Uiso 1 1 calc R U . . .
H16B H 0.0232 0.7735 0.0952 0.084 Uiso 1 1 calc R U . . .
C17 C 0.07262(14) 0.6411(3) 0.07190(15) 0.0637(9) Uani 1 1 d . . . . .
H17A H 0.0582 0.5886 0.0988 0.076 Uiso 1 1 calc R U . . .
H17B H 0.0424 0.6324 0.0264 0.076 Uiso 1 1 calc R U . . .
C18 C 0.15407(14) 0.5138(3) 0.05446(13) 0.0564(8) Uani 1 1 d . . . . .
C19 C 0.10806(15) 0.4257(3) 0.03637(14) 0.0616(9) Uani 1 1 d . . . . .
H19 H 0.0651 0.4334 0.0398 0.074 Uiso 1 1 calc R U . . .
C20 C 0.12544(14) 0.3260(3) 0.01310(14) 0.0609(9) Uani 1 1 d . . . . .
H20 H 0.0933 0.2679 0.0006 0.073 Uiso 1 1 calc R U . . .
C21 C 0.18913(14) 0.3089(3) 0.00764(13) 0.0566(8) Uani 1 1 d . . . . .
C22 C 0.23535(14) 0.3989(3) 0.02773(13) 0.0577(8) Uani 1 1 d . . . . .
H22 H 0.2787 0.3907 0.0253 0.069 Uiso 1 1 calc R U . . .
C23 C 0.21917(14) 0.4989(3) 0.05083(13) 0.0571(8) Uani 1 1 d . . . . .
H23 H 0.2514 0.5568 0.0641 0.069 Uiso 1 1 calc R U . . .
C24 C 0.20686(15) 0.2012(3) -0.01957(14) 0.0616(9) Uani 1 1 d . . . . .
H24A H 0.2431 0.1628 0.0151 0.074 Uiso 1 1 calc R U . . .
H24B H 0.1671 0.1519 -0.0331 0.074 Uiso 1 1 calc R U . . .
C25 C 0.17534(13) 0.2635(2) -0.12991(13) 0.0467(7) Uani 1 1 d . . . . .
H25A H 0.1599 0.3352 -0.1182 0.056 Uiso 1 1 calc R U . . .
H25B H 0.1368 0.2117 -0.1432 0.056 Uiso 1 1 calc R U . . .
C26 C 0.20035(12) 0.2811(2) -0.18621(12) 0.0399(6) Uani 1 1 d . . . . .
C27 C 0.25732(13) 0.2265(2) -0.19169(14) 0.0481(7) Uani 1 1 d . . . . .
H27 H 0.2831 0.1766 -0.1592 0.058 Uiso 1 1 calc R U . . .
C28 C 0.27467(13) 0.2480(2) -0.24615(14) 0.0513(7) Uani 1 1 d . . . . .
H28 H 0.3125 0.2126 -0.2509 0.062 Uiso 1 1 calc R U . . .
C29 C 0.23551(12) 0.3226(2) -0.29372(13) 0.0434(6) Uani 1 1 d . . . . .
H29 H 0.2465 0.3377 -0.3309 0.052 Uiso 1 1 calc R U . . .
C30 C 0.17952(11) 0.3747(2) -0.28514(11) 0.0341(6) Uani 1 1 d . . . . .
C31 C 0.55824(13) 0.4079(2) 0.06292(15) 0.0521(7) Uani 1 1 d . . . . .
H31A H 0.5273 0.4546 0.0755 0.078 Uiso 1 1 calc R U . . .
H31B H 0.5602 0.3338 0.0818 0.078 Uiso 1 1 calc R U . . .
H31C H 0.5424 0.4018 0.0157 0.078 Uiso 1 1 calc R U . . .
C32 C 0.62612(14) 0.5764(2) 0.05591(15) 0.0519(7) Uani 1 1 d . . . . .
H32A H 0.6704 0.6116 0.0724 0.078 Uiso 1 1 calc R U . . .
H32B H 0.5935 0.6232 0.0661 0.078 Uiso 1 1 calc R U . . .
H32C H 0.6123 0.5675 0.0090 0.078 Uiso 1 1 calc R U . . .
C33 C 0.65169(14) 0.4750(3) 0.16243(13) 0.0530(7) Uani 1 1 d . . . . .
H33A H 0.6970 0.5065 0.1792 0.080 Uiso 1 1 calc R U . . .
H33B H 0.6516 0.4024 0.1824 0.080 Uiso 1 1 calc R U . . .
H33C H 0.6205 0.5248 0.1726 0.080 Uiso 1 1 calc R U . . .
C34 C 0.62955(12) 0.4612(2) 0.08786(12) 0.0390(6) Uani 1 1 d . . . . .
C35 C 0.68156(12) 0.3872(2) 0.07068(11) 0.0351(6) Uani 1 1 d . . . . .
C36 C 0.75140(12) 0.4111(2) 0.09780(11) 0.0351(5) Uani 1 1 d . . . . .
H36 H 0.7661 0.4717 0.1269 0.042 Uiso 1 1 calc R U . . .
C37 C 0.79976(12) 0.3468(2) 0.08255(11) 0.0336(5) Uani 1 1 d . . . . .
C38 C 0.77835(13) 0.2558(2) 0.03939(12) 0.0384(6) Uani 1 1 d . . . . .
H38 H 0.8103 0.2112 0.0297 0.046 Uiso 1 1 calc R U . . .
C39 C 0.70889(13) 0.2320(2) 0.01084(12) 0.0399(6) Uani 1 1 d . . . . .
C40 C 0.66151(13) 0.2981(2) 0.02653(12) 0.0389(6) Uani 1 1 d . . . . .
H40 H 0.6151 0.2820 0.0068 0.047 Uiso 1 1 calc R U . . .
C41 C 0.68461(14) 0.1385(3) -0.03490(13) 0.0480(7) Uani 1 1 d . . . . .
C42 C 0.66145(18) 0.0642(3) -0.07091(17) 0.0662(9) Uani 1 1 d . . . . .
H42 H 0.6429 0.0046 -0.0998 0.079 Uiso 1 1 calc R U . . .
C43 C 0.87214(12) 0.3785(2) 0.10948(11) 0.0331(5) Uani 1 1 d . . . . .
C44 C 0.90699(11) 0.4454(2) 0.16238(11) 0.0335(5) Uani 1 1 d . . . . .
H44 H 0.8895 0.4816 0.1912 0.040 Uiso 1 1 calc R U . . .
C45 C 1.02991(11) 0.5042(2) 0.20879(11) 0.0322(5) Uani 1 1 d . . . . .
C46 C 1.01898(11) 0.5992(2) 0.24175(11) 0.0324(5) Uani 1 1 d . . . . .
H46 H 0.9746 0.6235 0.2348 0.039 Uiso 1 1 calc R U . . .
C47 C 1.07415(11) 0.6576(2) 0.28477(11) 0.0357(6) Uani 1 1 d . . . . .
C48 C 1.13962(12) 0.6171(2) 0.29423(12) 0.0410(6) Uani 1 1 d . . . . .
H48 H 1.1770 0.6558 0.3232 0.049 Uiso 1 1 calc R U . . .
C49 C 1.15170(12) 0.5219(2) 0.26235(13) 0.0441(7) Uani 1 1 d . . . . .
C50 C 1.09545(12) 0.4645(2) 0.21879(12) 0.0411(6) Uani 1 1 d . . . . .
H50 H 1.1018 0.4004 0.1967 0.049 Uiso 1 1 calc R U . . .
C51 C 1.06419(12) 0.7607(2) 0.32285(13) 0.0420(6) Uani 1 1 d . . . . .
C52 C 0.99190(13) 0.8078(2) 0.29429(14) 0.0491(7) Uani 1 1 d . . . . .
H52A H 0.9816 0.8265 0.2487 0.074 Uiso 1 1 calc R U . . .
H52B H 0.9885 0.8747 0.3181 0.074 Uiso 1 1 calc R U . . .
H52C H 0.9600 0.7520 0.2980 0.074 Uiso 1 1 calc R U . . .
C53 C 1.11314(14) 0.8563(3) 0.32048(18) 0.0660(9) Uani 1 1 d . . . . .
H53A H 1.1595 0.8298 0.3387 0.099 Uiso 1 1 calc R U . . .
H53B H 1.1072 0.9198 0.3457 0.099 Uiso 1 1 calc R U . . .
H53C H 1.1033 0.8792 0.2756 0.099 Uiso 1 1 calc R U . . .
C54 C 1.07801(16) 0.7257(3) 0.39420(14) 0.0594(8) Uani 1 1 d . . . . .
H54A H 1.0470 0.6662 0.3952 0.089 Uiso 1 1 calc R U . . .
H54B H 1.0714 0.7898 0.4186 0.089 Uiso 1 1 calc R U . . .
H54C H 1.1243 0.6991 0.4136 0.089 Uiso 1 1 calc R U . . .
C55 C 1.22440(13) 0.4799(3) 0.27385(16) 0.0565(8) Uani 1 1 d . . . . .
C56 C 1.2314(2) 0.3586(4) 0.2970(3) 0.0511(12) Uani 0.6 1 d . . P A 1
H56A H 1.2017 0.3114 0.2627 0.077 Uiso 0.6 1 calc R U P A 1
H56B H 1.2190 0.3528 0.3355 0.077 Uiso 0.6 1 calc R U P A 1
H56C H 1.2779 0.3344 0.3075 0.077 Uiso 0.6 1 calc R U P A 1
C57 C 1.27941(19) 0.5494(4) 0.3363(2) 0.0405(10) Uani 0.6 1 d . . P A 1
H57A H 1.3246 0.5200 0.3450 0.061 Uiso 0.6 1 calc R U P A 1
H57B H 1.2671 0.5402 0.3747 0.061 Uiso 0.6 1 calc R U P A 1
H57C H 1.2784 0.6285 0.3255 0.061 Uiso 0.6 1 calc R U P A 1
C58 C 1.2417(3) 0.5028(7) 0.2177(3) 0.0593(18) Uani 0.6 1 d . . P A 1
H58A H 1.2888 0.4833 0.2268 0.089 Uiso 0.6 1 calc R U P A 1
H58B H 1.2350 0.5819 0.2070 0.089 Uiso 0.6 1 calc R U P A 1
H58C H 1.2131 0.4586 0.1812 0.089 Uiso 0.6 1 calc R U P A 1
C59 C 1.2211(4) 0.3608(6) 0.2231(4) 0.059(2) Uani 0.4 1 d . . P A 2
H59A H 1.2663 0.3304 0.2333 0.089 Uiso 0.4 1 calc R U P A 2
H59B H 1.2032 0.3833 0.1777 0.089 Uiso 0.4 1 calc R U P A 2
H59C H 1.1919 0.3040 0.2309 0.089 Uiso 0.4 1 calc R U P A 2
C60 C 1.2584(6) 0.4375(14) 0.3346(5) 0.112(5) Uani 0.4 1 d . . P A 2
H60A H 1.2630 0.4953 0.3671 0.169 Uiso 0.4 1 calc R U P A 2
H60B H 1.3030 0.4126 0.3371 0.169 Uiso 0.4 1 calc R U P A 2
H60C H 1.2334 0.3745 0.3428 0.169 Uiso 0.4 1 calc R U P A 2
C61 C 1.2585(6) 0.5587(10) 0.2395(7) 0.077(4) Uani 0.4 1 d . . P A 2
H61A H 1.2659 0.6313 0.2609 0.115 Uiso 0.4 1 calc R U P A 2
H61B H 1.2295 0.5675 0.1942 0.115 Uiso 0.4 1 calc R U P A 2
H61C H 1.3016 0.5272 0.2417 0.115 Uiso 0.4 1 calc R U P A 2
N1 N 0.09787(9) 0.52765(16) -0.31126(9) 0.0321(4) Uani 1 1 d . . . . .
N2 N 0.16222(9) 0.35464(16) -0.23191(10) 0.0343(5) Uani 1 1 d . . . . .
N3 N 0.97185(9) 0.44739(16) 0.16370(9) 0.0335(5) Uani 1 1 d . . . . .
N4 N 0.97797(10) 0.38501(18) 0.11324(10) 0.0397(5) Uani 1 1 d . . . . .
N5 N 0.91746(11) 0.34339(17) 0.08075(10) 0.0399(5) Uani 1 1 d . . . . .
O1 O 0.00873(10) 0.78676(14) -0.35202(9) 0.0499(5) Uani 1 1 d . . . . .
O2 O 0.05716(10) 0.92896(15) -0.05549(9) 0.0541(5) Uani 1 1 d . . . . .
O3 O 0.14187(9) 0.6170(2) 0.07752(9) 0.0628(6) Uani 1 1 d . . . . .
O4 O 0.22853(9) 0.21863(17) -0.07440(9) 0.0565(5) Uani 1 1 d . . . . .
 
loop_
 _atom_site_aniso_label
 _atom_site_aniso_U_11
 _atom_site_aniso_U_22
 _atom_site_aniso_U_33
 _atom_site_aniso_U_23
 _atom_site_aniso_U_13
 _atom_site_aniso_U_12
C1 0.0292(12) 0.0312(13) 0.0398(13) -0.0047(11) 0.0143(11) -0.0023(10)
C2 0.0521(16) 0.0428(15) 0.0454(15) -0.0064(13) 0.0264(13) -0.0004(13)
C3 0.0638(19) 0.0507(17) 0.0368(14) 0.0019(13) 0.0211(13) 0.0046(14)
C4 0.0483(16) 0.0438(16) 0.0405(14) 0.0061(12) 0.0142(12) 0.0054(13)
C5 0.0370(14) 0.0335(14) 0.0411(14) 0.0048(11) 0.0167(11) 0.0006(11)
C6 0.0477(16) 0.0379(15) 0.0568(16) 0.0147(13) 0.0280(13) 0.0121(12)
C7 0.068(2) 0.0476(17) 0.0584(18) 0.0157(14) 0.0336(16) 0.0269(14)
C8 0.0520(18) 0.0333(14) 0.0592(17) 0.0104(13) 0.0276(14) 0.0153(12)
C9 0.0456(16) 0.0376(15) 0.0554(17) 0.0033(13) 0.0238(13) 0.0069(12)
C10 0.0425(16) 0.0434(16) 0.0596(18) -0.0048(13) 0.0275(14) 0.0022(12)
C11 0.0478(16) 0.0340(15) 0.0573(17) -0.0055(13) 0.0262(14) 0.0021(12)
C12 0.0477(17) 0.0432(16) 0.071(2) 0.0040(14) 0.0287(15) -0.0010(13)
C13 0.060(2) 0.0517(18) 0.071(2) 0.0162(15) 0.0406(17) 0.0074(15)
C14 0.0416(16) 0.0543(17) 0.0564(17) -0.0160(14) 0.0258(14) -0.0045(13)
C15 0.0403(16) 0.086(2) 0.0541(17) -0.0267(16) 0.0190(14) -0.0134(15)
C16 0.0385(16) 0.133(3) 0.0402(16) -0.0114(19) 0.0167(13) -0.0092(18)
C17 0.0334(16) 0.110(3) 0.0446(16) 0.0116(18) 0.0105(13) -0.0090(16)
C18 0.0362(16) 0.086(2) 0.0404(15) 0.0129(16) 0.0058(12) -0.0089(16)
C19 0.0323(16) 0.096(3) 0.0520(17) 0.0134(18) 0.0095(13) -0.0143(17)
C20 0.0346(16) 0.087(3) 0.0515(17) 0.0166(17) 0.0036(13) -0.0157(16)
C21 0.0380(16) 0.085(2) 0.0401(15) 0.0229(15) 0.0052(12) -0.0063(15)
C22 0.0325(15) 0.092(3) 0.0445(16) 0.0249(17) 0.0083(13) -0.0057(16)
C23 0.0320(15) 0.087(2) 0.0460(16) 0.0159(17) 0.0065(12) -0.0128(15)
C24 0.0443(17) 0.079(2) 0.0531(18) 0.0283(17) 0.0071(14) -0.0007(16)
C25 0.0313(13) 0.0522(17) 0.0485(15) 0.0131(13) 0.0042(12) 0.0034(12)
C26 0.0298(13) 0.0365(14) 0.0469(15) 0.0007(12) 0.0056(11) 0.0028(11)
C27 0.0332(14) 0.0477(17) 0.0536(17) -0.0011(13) 0.0030(12) 0.0089(12)
C28 0.0350(15) 0.0561(18) 0.0586(18) -0.0121(15) 0.0113(14) 0.0142(13)
C29 0.0336(14) 0.0513(16) 0.0459(15) -0.0076(13) 0.0146(12) 0.0053(12)
C30 0.0280(13) 0.0341(13) 0.0393(13) -0.0083(11) 0.0108(11) -0.0013(10)
C31 0.0363(15) 0.0549(17) 0.0695(18) -0.0022(15) 0.0242(14) -0.0014(13)
C32 0.0357(15) 0.0466(17) 0.0730(19) 0.0019(14) 0.0188(14) 0.0048(12)
C33 0.0408(16) 0.0652(19) 0.0605(18) -0.0075(15) 0.0272(14) 0.0074(13)
C34 0.0285(13) 0.0428(15) 0.0477(15) 0.0012(12) 0.0158(11) 0.0031(11)
C35 0.0328(13) 0.0379(14) 0.0381(13) 0.0037(11) 0.0169(11) -0.0004(11)
C36 0.0339(13) 0.0360(14) 0.0365(13) 0.0024(11) 0.0139(11) 0.0003(11)
C37 0.0329(13) 0.0382(14) 0.0342(13) 0.0031(11) 0.0176(11) 0.0021(11)
C38 0.0403(14) 0.0401(15) 0.0402(14) -0.0013(12) 0.0209(12) 0.0011(11)
C39 0.0461(15) 0.0400(15) 0.0381(14) -0.0013(12) 0.0205(12) -0.0037(12)
C40 0.0337(14) 0.0435(15) 0.0401(14) 0.0003(12) 0.0136(11) -0.0041(11)
C41 0.0507(17) 0.0524(18) 0.0439(15) -0.0076(15) 0.0206(13) -0.0076(14)
C42 0.078(2) 0.061(2) 0.067(2) -0.0113(18) 0.0357(18) -0.0095(18)
C43 0.0327(13) 0.0364(13) 0.0348(13) 0.0043(11) 0.0178(11) 0.0075(11)
C44 0.0272(12) 0.0392(14) 0.0397(13) 0.0050(12) 0.0187(11) 0.0083(10)
C45 0.0236(12) 0.0404(14) 0.0344(13) 0.0102(11) 0.0124(10) 0.0038(10)
C46 0.0200(12) 0.0407(14) 0.0398(13) 0.0102(11) 0.0147(10) 0.0043(10)
C47 0.0233(12) 0.0424(15) 0.0419(14) 0.0129(11) 0.0122(11) 0.0015(10)
C48 0.0237(13) 0.0485(16) 0.0476(15) 0.0172(13) 0.0087(11) 0.0029(11)
C49 0.0250(13) 0.0546(17) 0.0553(16) 0.0238(14) 0.0173(12) 0.0098(12)
C50 0.0330(14) 0.0490(16) 0.0472(15) 0.0150(12) 0.0213(12) 0.0162(12)
C51 0.0272(13) 0.0410(15) 0.0540(16) 0.0003(12) 0.0098(12) -0.0019(11)
C52 0.0316(14) 0.0444(16) 0.0653(18) -0.0059(14) 0.0098(13) -0.0002(12)
C53 0.0356(16) 0.0519(19) 0.103(2) -0.0001(17) 0.0148(16) -0.0107(13)
C54 0.0559(18) 0.067(2) 0.0529(18) -0.0039(15) 0.0162(15) 0.0087(15)
C55 0.0258(14) 0.065(2) 0.078(2) 0.0206(16) 0.0175(14) 0.0160(13)
C56 0.027(2) 0.042(3) 0.075(4) -0.008(3) 0.008(2) 0.011(2)
C57 0.016(2) 0.046(3) 0.052(3) -0.001(2) 0.0034(18) 0.0052(18)
C58 0.025(3) 0.100(6) 0.057(4) 0.003(4) 0.020(3) 0.017(3)
C59 0.033(4) 0.058(5) 0.091(6) -0.003(4) 0.028(4) 0.011(3)
C60 0.077(7) 0.169(14) 0.080(7) 0.019(8) 0.014(6) 0.080(9)
C61 0.041(6) 0.072(8) 0.123(11) -0.023(6) 0.036(6) -0.002(5)
N1 0.0276(10) 0.0325(11) 0.0386(11) -0.0005(9) 0.0146(9) 0.0006(8)
N2 0.0250(10) 0.0334(11) 0.0432(11) 0.0011(9) 0.0105(9) 0.0026(8)
N3 0.0266(11) 0.0417(12) 0.0354(11) 0.0058(9) 0.0150(9) 0.0081(9)
N4 0.0345(12) 0.0489(13) 0.0411(12) -0.0012(10) 0.0201(10) 0.0098(10)
N5 0.0365(12) 0.0452(13) 0.0429(12) -0.0007(10) 0.0202(10) 0.0071(10)
O1 0.0631(12) 0.0403(10) 0.0583(11) 0.0171(9) 0.0362(10) 0.0154(9)
O2 0.0520(12) 0.0509(12) 0.0655(13) -0.0167(10) 0.0284(10) -0.0118(9)
O3 0.0324(11) 0.0990(18) 0.0504(11) 0.0111(12) 0.0062(9) -0.0110(10)
O4 0.0360(10) 0.0729(13) 0.0533(11) 0.0267(10) 0.0067(9) 0.0098(9)
 
_geom_special_details
;
 All esds (except the esd in the dihedral angle between two l.s. planes)
 are estimated using the full covariance matrix.  The cell esds are taken
 into account individually in the estimation of esds in distances, angles
 and torsion angles; correlations between esds in cell parameters are only
 used when they are defined by crystal symmetry.  An approximate (isotropic)
 treatment of cell esds is used for estimating esds involving l.s. planes.
;
 
loop_
 _geom_bond_atom_site_label_1
 _geom_bond_atom_site_label_2
 _geom_bond_distance
 _geom_bond_site_symmetry_2
 _geom_bond_publ_flag
C1 N1 1.345(3) . ?
C1 C2 1.387(3) . ?
C1 C30 1.491(3) . ?
C2 C3 1.377(4) . ?
C3 C4 1.370(4) . ?
C4 C5 1.379(3) . ?
C5 N1 1.342(3) . ?
C5 C6 1.498(3) . ?
C6 O1 1.423(3) . ?
C7 O1 1.432(3) . ?
C7 C8 1.508(4) . ?
C8 C9 1.377(4) . ?
C8 C13 1.393(4) . ?
C9 C10 1.381(4) . ?
C10 C11 1.382(4) . ?
C11 O2 1.379(3) . ?
C11 C12 1.383(4) . ?
C12 C13 1.372(4) . ?
C14 O2 1.437(3) . ?
C14 C15 1.508(4) . ?
C15 C16 1.524(5) . ?
C16 C17 1.500(5) . ?
C17 O3 1.436(3) . ?
C18 O3 1.374(4) . ?
C18 C19 1.375(4) . ?
C18 C23 1.400(4) . ?
C19 C20 1.378(5) . ?
C20 C21 1.390(4) . ?
C21 C22 1.397(4) . ?
C21 C24 1.501(5) . ?
C22 C23 1.369(5) . ?
C24 O4 1.428(3) . ?
C25 O4 1.421(3) . ?
C25 C26 1.501(4) . ?
C26 N2 1.346(3) . ?
C26 C27 1.394(4) . ?
C27 C28 1.375(4) . ?
C28 C29 1.382(4) . ?
C29 C30 1.390(3) . ?
C30 N2 1.346(3) . ?
C31 C34 1.528(3) . ?
C32 C34 1.516(4) . ?
C33 C34 1.525(4) . ?
C34 C35 1.537(3) . ?
C35 C40 1.383(3) . ?
C35 C36 1.395(3) . ?
C36 C37 1.393(3) . ?
C37 C38 1.389(3) . ?
C37 C43 1.464(3) . ?
C38 C39 1.390(3) . ?
C39 C40 1.393(3) . ?
C39 C41 1.449(4) . ?
C41 C42 1.160(4) . ?
C43 N5 1.368(3) . ?
C43 C44 1.370(3) . ?
C44 N3 1.345(3) . ?
C45 C50 1.389(3) . ?
C45 C46 1.391(3) . ?
C45 N3 1.427(3) . ?
C46 C47 1.383(3) . ?
C47 C48 1.393(3) . ?
C47 C51 1.525(4) . ?
C48 C49 1.388(4) . ?
C49 C50 1.395(4) . ?
C49 C55 1.531(3) . ?
C51 C52 1.520(3) . ?
C51 C54 1.527(4) . ?
C51 C53 1.535(4) . ?
C55 C60 1.353(10) . ?
C55 C58 1.413(7) . ?
C55 C56 1.506(6) . ?
C55 C61 1.516(13) . ?
C55 C57 1.651(5) . ?
C55 C59 1.770(8) . ?
N3 N4 1.361(3) . ?
N4 N5 1.306(3) . ?
 
loop_
 _geom_angle_atom_site_label_1
 _geom_angle_atom_site_label_2
 _geom_angle_atom_site_label_3
 _geom_angle
 _geom_angle_site_symmetry_1
 _geom_angle_site_symmetry_3
 _geom_angle_publ_flag
N1 C1 C2 121.2(2) . . ?
N1 C1 C30 116.14(19) . . ?
C2 C1 C30 122.6(2) . . ?
C3 C2 C1 119.6(2) . . ?
C4 C3 C2 119.1(2) . . ?
C3 C4 C5 118.8(2) . . ?
N1 C5 C4 122.7(2) . . ?
N1 C5 C6 114.6(2) . . ?
C4 C5 C6 122.6(2) . . ?
O1 C6 C5 109.61(19) . . ?
O1 C7 C8 113.8(2) . . ?
C9 C8 C13 117.2(3) . . ?
C9 C8 C7 121.0(3) . . ?
C13 C8 C7 121.7(2) . . ?
C8 C9 C10 122.2(3) . . ?
C9 C10 C11 119.3(2) . . ?
O2 C11 C10 124.3(2) . . ?
O2 C11 C12 115.9(2) . . ?
C10 C11 C12 119.7(3) . . ?
C13 C12 C11 119.8(3) . . ?
C12 C13 C8 121.7(3) . . ?
O2 C14 C15 107.1(2) . . ?
C14 C15 C16 113.4(2) . . ?
C17 C16 C15 114.1(2) . . ?
O3 C17 C16 109.0(3) . . ?
O3 C18 C19 125.0(3) . . ?
O3 C18 C23 116.1(3) . . ?
C19 C18 C23 118.9(3) . . ?
C18 C19 C20 120.1(3) . . ?
C19 C20 C21 122.5(3) . . ?
C20 C21 C22 116.1(3) . . ?
C20 C21 C24 122.1(3) . . ?
C22 C21 C24 121.8(3) . . ?
C23 C22 C21 122.4(3) . . ?
C22 C23 C18 119.9(3) . . ?
O4 C24 C21 113.6(2) . . ?
O4 C25 C26 110.3(2) . . ?
N2 C26 C27 122.4(2) . . ?
N2 C26 C25 113.7(2) . . ?
C27 C26 C25 123.9(2) . . ?
C28 C27 C26 118.6(2) . . ?
C27 C28 C29 119.5(2) . . ?
C28 C29 C30 119.1(2) . . ?
N2 C30 C29 122.0(2) . . ?
N2 C30 C1 115.84(19) . . ?
C29 C30 C1 122.2(2) . . ?
C32 C34 C33 109.6(2) . . ?
C32 C34 C31 108.9(2) . . ?
C33 C34 C31 108.2(2) . . ?
C32 C34 C35 108.8(2) . . ?
C33 C34 C35 110.0(2) . . ?
C31 C34 C35 111.4(2) . . ?
C40 C35 C36 117.5(2) . . ?
C40 C35 C34 122.1(2) . . ?
C36 C35 C34 120.4(2) . . ?
C37 C36 C35 121.8(2) . . ?
C38 C37 C36 119.5(2) . . ?
C38 C37 C43 120.5(2) . . ?
C36 C37 C43 119.9(2) . . ?
C37 C38 C39 119.5(2) . . ?
C38 C39 C40 119.8(2) . . ?
C38 C39 C41 121.1(2) . . ?
C40 C39 C41 119.1(2) . . ?
C35 C40 C39 121.8(2) . . ?
C42 C41 C39 175.9(3) . . ?
N5 C43 C44 107.9(2) . . ?
N5 C43 C37 121.6(2) . . ?
C44 C43 C37 130.5(2) . . ?
N3 C44 C43 105.13(19) . . ?
C50 C45 C46 121.5(2) . . ?
C50 C45 N3 120.1(2) . . ?
C46 C45 N3 118.45(19) . . ?
C47 C46 C45 119.9(2) . . ?
C46 C47 C48 118.0(2) . . ?
C46 C47 C51 121.5(2) . . ?
C48 C47 C51 120.5(2) . . ?
C49 C48 C47 123.0(2) . . ?
C48 C49 C50 118.2(2) . . ?
C48 C49 C55 121.6(2) . . ?
C50 C49 C55 120.2(3) . . ?
C45 C50 C49 119.4(2) . . ?
C52 C51 C47 112.1(2) . . ?
C52 C51 C54 108.5(2) . . ?
C47 C51 C54 108.6(2) . . ?
C52 C51 C53 107.1(2) . . ?
C47 C51 C53 110.4(2) . . ?
C54 C51 C53 110.0(2) . . ?
C58 C55 C56 116.4(4) . . ?
C60 C55 C61 121.9(8) . . ?
C60 C55 C49 115.3(5) . . ?
C58 C55 C49 109.8(3) . . ?
C56 C55 C49 109.6(3) . . ?
C61 C55 C49 109.4(5) . . ?
C58 C55 C57 107.2(4) . . ?
C56 C55 C57 103.9(3) . . ?
C49 C55 C57 109.6(3) . . ?
C60 C55 C59 101.7(7) . . ?
C61 C55 C59 96.0(5) . . ?
C49 C55 C59 109.6(3) . . ?
C5 N1 C1 118.49(19) . . ?
C26 N2 C30 118.5(2) . . ?
C44 N3 N4 110.67(19) . . ?
C44 N3 C45 128.92(19) . . ?
N4 N3 C45 120.41(18) . . ?
N5 N4 N3 106.82(17) . . ?
N4 N5 C43 109.48(19) . . ?
C6 O1 C7 111.64(18) . . ?
C11 O2 C14 117.24(19) . . ?
C18 O3 C17 117.1(2) . . ?
C25 O4 C24 112.1(2) . . ?
 
_refine_diff_density_max    0.285
_refine_diff_density_min   -0.215
_refine_diff_density_rms    0.043

_shelx_res_file
;

    shelx.res created by SHELXL-2014/7


TITL RotaxE in P2(1)/n
CELL  1.54178  20.8780  11.7961  21.6770   90.000  110.666   90.000
ZERR     4.00   0.0030   0.0013   0.0030    0.000    0.005    0.000
LATT   1
SYMM  1/2 - X, 1/2 + Y, 1/2 - Z
SFAC  C    H    N    O
UNIT  232 260 20 16
MERG   2
FMAP   2
PLAN    5
ACTA
L.S.  10
SIZE 0.200 0.146 0.078
WGHT    0.070500
FVAR       0.18374
C1    1    0.135548    0.457585   -0.333694    11.00000    0.02925    0.03119 =
         0.03982   -0.00469    0.01432   -0.00230
C2    1    0.133783    0.464224   -0.398177    11.00000    0.05206    0.04282 =
         0.04540   -0.00639    0.02639   -0.00038
AFIX  43
H2    2    0.160510    0.415671   -0.412809    11.00000   -1.20000
AFIX   0
C3    1    0.092208    0.543158   -0.440392    11.00000    0.06382    0.05069 =
         0.03682    0.00188    0.02105    0.00460
AFIX  43
H3    2    0.090373    0.548211   -0.483798    11.00000   -1.20000
AFIX   0
C4    1    0.053596    0.614124   -0.417572    11.00000    0.04827    0.04378 =
         0.04046    0.00612    0.01416    0.00536
AFIX  43
H4    2    0.025177    0.668090   -0.445187    11.00000   -1.20000
AFIX   0
C5    1    0.057619    0.604114   -0.352934    11.00000    0.03699    0.03346 =
         0.04114    0.00483    0.01669    0.00059
C6    1    0.016336    0.676287   -0.323982    11.00000    0.04773    0.03794 =
         0.05680    0.01470    0.02797    0.01206
AFIX  23
H6A   2   -0.028365    0.642401   -0.332888    11.00000   -1.20000
H6B   2    0.039119    0.681117   -0.276565    11.00000   -1.20000
AFIX   0
C7    1   -0.037266    0.854760   -0.331923    11.00000    0.06797    0.04757 =
         0.05843    0.01573    0.03364    0.02695
AFIX  23
H7A   2   -0.081559    0.817663   -0.345712    11.00000   -1.20000
H7B   2   -0.043224    0.927260   -0.354369    11.00000   -1.20000
AFIX   0
C8    1   -0.013378    0.875422   -0.258594    11.00000    0.05201    0.03328 =
         0.05921    0.01044    0.02756    0.01532
C9    1   -0.056260    0.857065   -0.223731    11.00000    0.04561    0.03760 =
         0.05537    0.00334    0.02376    0.00686
AFIX  43
H9    2   -0.100515    0.831339   -0.246130    11.00000   -1.20000
AFIX   0
C10   1   -0.035734    0.875587   -0.156614    11.00000    0.04253    0.04342 =
         0.05964   -0.00475    0.02752    0.00224
AFIX  43
H10   2   -0.066004    0.863545   -0.134443    11.00000   -1.20000
AFIX   0
C11   1    0.030282    0.912214   -0.122751    11.00000    0.04777    0.03403 =
         0.05728   -0.00552    0.02623    0.00211
C12   1    0.074260    0.932341   -0.156597    11.00000    0.04767    0.04319 =
         0.07130    0.00399    0.02867   -0.00100
AFIX  43
H12   2    0.118454    0.958318   -0.134178    11.00000   -1.20000
AFIX   0
C13   1    0.052514    0.913879   -0.223351    11.00000    0.06007    0.05169 =
         0.07128    0.01625    0.04063    0.00737
AFIX  43
H13   2    0.082538    0.927390   -0.245619    11.00000   -1.20000
AFIX   0
C14   1    0.029114    0.862356   -0.015581    11.00000    0.04164    0.05429 =
         0.05639   -0.01595    0.02582   -0.00447
AFIX  23
H14A  2    0.015423    0.788292   -0.035260    11.00000   -1.20000
H14B  2   -0.010707    0.899692   -0.011743    11.00000   -1.20000
AFIX   0
C15   1    0.084384    0.850606    0.051370    11.00000    0.04026    0.08616 =
         0.05408   -0.02671    0.01902   -0.01343
AFIX  23
H15A  2    0.090428    0.922981    0.073957    11.00000   -1.20000
H15B  2    0.127160    0.831796    0.045624    11.00000   -1.20000
AFIX   0
C16   1    0.068792    0.760341    0.094389    11.00000    0.03848    0.13305 =
         0.04022   -0.01142    0.01668   -0.00922
AFIX  23
H16A  2    0.100906    0.768509    0.139144    11.00000   -1.20000
H16B  2    0.023219    0.773526    0.095154    11.00000   -1.20000
AFIX   0
C17   1    0.072616    0.641134    0.071895    11.00000    0.03336    0.11038 =
         0.04463    0.01159    0.01054   -0.00895
AFIX  23
H17A  2    0.058162    0.588571    0.098834    11.00000   -1.20000
H17B  2    0.042376    0.632356    0.026446    11.00000   -1.20000
AFIX   0
C18   1    0.154070    0.513785    0.054464    11.00000    0.03623    0.08627 =
         0.04040    0.01292    0.00577   -0.00891
C19   1    0.108064    0.425704    0.036369    11.00000    0.03230    0.09607 =
         0.05199    0.01340    0.00950   -0.01435
AFIX  43
H19   2    0.065135    0.433431    0.039840    11.00000   -1.20000
AFIX   0
C20   1    0.125443    0.325991    0.013096    11.00000    0.03463    0.08726 =
         0.05153    0.01664    0.00359   -0.01572
AFIX  43
H20   2    0.093334    0.267858    0.000553    11.00000   -1.20000
AFIX   0
C21   1    0.189128    0.308931    0.007643    11.00000    0.03799    0.08479 =
         0.04006    0.02293    0.00515   -0.00634
C22   1    0.235354    0.398932    0.027731    11.00000    0.03255    0.09180 =
         0.04447    0.02489    0.00826   -0.00567
AFIX  43
H22   2    0.278708    0.390652    0.025324    11.00000   -1.20000
AFIX   0
C23   1    0.219170    0.498870    0.050830    11.00000    0.03202    0.08736 =
         0.04604    0.01592    0.00651   -0.01279
AFIX  43
H23   2    0.251376    0.556776    0.064091    11.00000   -1.20000
AFIX   0
C24   1    0.206863    0.201199   -0.019571    11.00000    0.04435    0.07936 =
         0.05305    0.02830    0.00711   -0.00075
AFIX  23
H24A  2    0.243086    0.162834    0.015124    11.00000   -1.20000
H24B  2    0.167128    0.151883   -0.033095    11.00000   -1.20000
AFIX   0
C25   1    0.175337    0.263515   -0.129911    11.00000    0.03127    0.05223 =
         0.04850    0.01314    0.00419    0.00345
AFIX  23
H25A  2    0.159946    0.335214   -0.118183    11.00000   -1.20000
H25B  2    0.136800    0.211659   -0.143214    11.00000   -1.20000
AFIX   0
C26   1    0.200347    0.281063   -0.186207    11.00000    0.02985    0.03653 =
         0.04686    0.00075    0.00562    0.00283
C27   1    0.257321    0.226525   -0.191690    11.00000    0.03319    0.04769 =
         0.05358   -0.00107    0.00299    0.00892
AFIX  43
H27   2    0.283078    0.176621   -0.159178    11.00000   -1.20000
AFIX   0
C28   1    0.274670    0.248008   -0.246148    11.00000    0.03501    0.05609 =
         0.05862   -0.01208    0.01129    0.01421
AFIX  43
H28   2    0.312452    0.212637   -0.250936    11.00000   -1.20000
AFIX   0
C29   1    0.235514    0.322587   -0.293717    11.00000    0.03356    0.05125 =
         0.04593   -0.00761    0.01458    0.00532
AFIX  43
H29   2    0.246465    0.337671   -0.330932    11.00000   -1.20000
AFIX   0
C30   1    0.179520    0.374732   -0.285135    11.00000    0.02801    0.03413 =
         0.03931   -0.00833    0.01085   -0.00127
C31   1    0.558241    0.407915    0.062920    11.00000    0.03634    0.05491 =
         0.06950   -0.00219    0.02415   -0.00136
AFIX 137
H31A  2    0.527267    0.454641    0.075535    11.00000   -1.50000
H31B  2    0.560230    0.333811    0.081815    11.00000   -1.50000
H31C  2    0.542429    0.401838    0.015744    11.00000   -1.50000
AFIX   0
C32   1    0.626119    0.576424    0.055905    11.00000    0.03573    0.04663 =
         0.07297    0.00194    0.01878    0.00482
AFIX 137
H32A  2    0.670400    0.611614    0.072432    11.00000   -1.50000
H32B  2    0.593521    0.623172    0.066066    11.00000   -1.50000
H32C  2    0.612265    0.567470    0.008986    11.00000   -1.50000
AFIX   0
C33   1    0.651689    0.475006    0.162434    11.00000    0.04085    0.06520 =
         0.06051   -0.00753    0.02724    0.00739
AFIX 137
H33A  2    0.696971    0.506521    0.179247    11.00000   -1.50000
H33B  2    0.651576    0.402360    0.182358    11.00000   -1.50000
H33C  2    0.620457    0.524849    0.172638    11.00000   -1.50000
AFIX   0
C34   1    0.629547    0.461165    0.087856    11.00000    0.02848    0.04283 =
         0.04769    0.00120    0.01580    0.00311
C35   1    0.681559    0.387245    0.070682    11.00000    0.03277    0.03785 =
         0.03813    0.00367    0.01691   -0.00045
C36   1    0.751397    0.411125    0.097801    11.00000    0.03392    0.03598 =
         0.03651    0.00236    0.01389    0.00034
AFIX  43
H36   2    0.766077    0.471682    0.126867    11.00000   -1.20000
AFIX   0
C37   1    0.799757    0.346777    0.082551    11.00000    0.03293    0.03819 =
         0.03423    0.00306    0.01761    0.00208
C38   1    0.778353    0.255841    0.039392    11.00000    0.04027    0.04011 =
         0.04020   -0.00133    0.02092    0.00113
AFIX  43
H38   2    0.810288    0.211234    0.029675    11.00000   -1.20000
AFIX   0
C39   1    0.708890    0.231993    0.010838    11.00000    0.04608    0.04004 =
         0.03810   -0.00131    0.02047   -0.00367
C40   1    0.661507    0.298142    0.026528    11.00000    0.03373    0.04346 =
         0.04012    0.00030    0.01364   -0.00412
AFIX  43
H40   2    0.615124    0.281950    0.006776    11.00000   -1.20000
AFIX   0
C41   1    0.684606    0.138532   -0.034897    11.00000    0.05072    0.05237 =
         0.04392   -0.00760    0.02060   -0.00760
C42   1    0.661453    0.064179   -0.070910    11.00000    0.07799    0.06139 =
         0.06723   -0.01130    0.03569   -0.00948
AFIX 163
H42   2    0.642894    0.004577   -0.099778    11.00000   -1.20000
AFIX   0
C43   1    0.872143    0.378528    0.109483    11.00000    0.03272    0.03638 =
         0.03484    0.00427    0.01776    0.00746
C44   1    0.906990    0.445402    0.162383    11.00000    0.02715    0.03920 =
         0.03971    0.00502    0.01870    0.00830
AFIX  43
H44   2    0.889542    0.481603    0.191170    11.00000   -1.20000
AFIX   0
C45   1    1.029908    0.504173    0.208791    11.00000    0.02363    0.04043 =
         0.03437    0.01021    0.01238    0.00375
C46   1    1.018979    0.599234    0.241745    11.00000    0.02002    0.04067 =
         0.03981    0.01018    0.01472    0.00431
AFIX  43
H46   2    0.974608    0.623532    0.234847    11.00000   -1.20000
AFIX   0
C47   1    1.074149    0.657562    0.284769    11.00000    0.02326    0.04241 =
         0.04194    0.01286    0.01221    0.00146
C48   1    1.139622    0.617138    0.294233    11.00000    0.02372    0.04846 =
         0.04756    0.01722    0.00872    0.00289
AFIX  43
H48   2    1.176970    0.655754    0.323246    11.00000   -1.20000
AFIX   0
C49   1    1.151697    0.521853    0.262351    11.00000    0.02499    0.05464 =
         0.05531    0.02381    0.01729    0.00981
C50   1    1.095448    0.464533    0.218792    11.00000    0.03304    0.04896 =
         0.04719    0.01500    0.02132    0.01620
AFIX  43
H50   2    1.101769    0.400386    0.196658    11.00000   -1.20000
AFIX   0
C51   1    1.064194    0.760680    0.322849    11.00000    0.02724    0.04104 =
         0.05397    0.00031    0.00980   -0.00191
C52   1    0.991898    0.807817    0.294285    11.00000    0.03163    0.04441 =
         0.06530   -0.00594    0.00976   -0.00020
AFIX 137
H52A  2    0.981569    0.826516    0.248690    11.00000   -1.50000
H52B  2    0.988472    0.874727    0.318141    11.00000   -1.50000
H52C  2    0.959999    0.751975    0.297987    11.00000   -1.50000
AFIX   0
C53   1    1.113136    0.856291    0.320485    11.00000    0.03559    0.05194 =
         0.10259   -0.00005    0.01479   -0.01066
AFIX 137
H53A  2    1.159514    0.829761    0.338721    11.00000   -1.50000
H53B  2    1.107231    0.919756    0.345685    11.00000   -1.50000
H53C  2    1.103276    0.879159    0.275570    11.00000   -1.50000
AFIX   0
C54   1    1.078010    0.725692    0.394198    11.00000    0.05591    0.06688 =
         0.05288   -0.00392    0.01622    0.00868
AFIX 137
H54A  2    1.047005    0.666241    0.395235    11.00000   -1.50000
H54B  2    1.071441    0.789755    0.418627    11.00000   -1.50000
H54C  2    1.124272    0.699077    0.413596    11.00000   -1.50000
AFIX   0
C55   1    1.224397    0.479921    0.273854    11.00000    0.02580    0.06464 =
         0.07828    0.02062    0.01750    0.01598
PART    1
C56   1    1.231412    0.358610    0.297012    10.60000    0.02721    0.04230 =
         0.07538   -0.00817    0.00772    0.01055
AFIX 137
H56A  2    1.201727    0.311363    0.262742    10.60000   -1.50000
H56B  2    1.219031    0.352804    0.335545    10.60000   -1.50000
H56C  2    1.277949    0.334354    0.307506    10.60000   -1.50000
AFIX   0
C57   1    1.279408    0.549416    0.336309    10.60000    0.01557    0.04647 =
         0.05243   -0.00099    0.00337    0.00520
AFIX 137
H57A  2    1.324636    0.520023    0.345028    10.60000   -1.50000
H57B  2    1.267131    0.540163    0.374722    10.60000   -1.50000
H57C  2    1.278441    0.628466    0.325489    10.60000   -1.50000
AFIX   0
C58   1    1.241743    0.502774    0.217709    10.60000    0.02517    0.09963 =
         0.05741    0.00266    0.01990    0.01738
AFIX 137
H58A  2    1.288838    0.483323    0.226780    10.60000   -1.50000
H58B  2    1.235044    0.581907    0.207034    10.60000   -1.50000
H58C  2    1.213135    0.458621    0.181164    10.60000   -1.50000
AFIX   0
PART    2
C59   1    1.221067    0.360783    0.223143    10.40000    0.03343    0.05786 =
         0.09103   -0.00331    0.02807    0.01069
AFIX 137
H59A  2    1.266302    0.330443    0.233323    10.40000   -1.50000
H59B  2    1.203215    0.383337    0.177682    10.40000   -1.50000
H59C  2    1.191878    0.303966    0.230926    10.40000   -1.50000
AFIX   0
C60   1    1.258431    0.437510    0.334634    10.40000    0.07712    0.16886 =
         0.07975    0.01885    0.01351    0.08033
AFIX 137
H60A  2    1.262988    0.495299    0.367094    10.40000   -1.50000
H60B  2    1.303043    0.412591    0.337104    10.40000   -1.50000
H60C  2    1.233414    0.374545    0.342834    10.40000   -1.50000
AFIX   0
C61   1    1.258480    0.558717    0.239541    10.40000    0.04082    0.07187 =
         0.12331   -0.02257    0.03620   -0.00174
AFIX 137
H61A  2    1.265861    0.631319    0.260922    10.40000   -1.50000
H61B  2    1.229537    0.567513    0.194233    10.40000   -1.50000
H61C  2    1.301630    0.527227    0.241734    10.40000   -1.50000
AFIX   0
PART    0
N1    3    0.097867    0.527654   -0.311260    11.00000    0.02761    0.03253 =
         0.03857   -0.00046    0.01463    0.00058
N2    3    0.162218    0.354638   -0.231909    11.00000    0.02495    0.03337 =
         0.04324    0.00109    0.01048    0.00261
N3    3    0.971848    0.447392    0.163696    11.00000    0.02665    0.04166 =
         0.03536    0.00575    0.01505    0.00811
N4    3    0.977970    0.385013    0.113243    11.00000    0.03450    0.04886 =
         0.04109   -0.00123    0.02013    0.00980
N5    3    0.917456    0.343394    0.080746    11.00000    0.03650    0.04522 =
         0.04287   -0.00069    0.02016    0.00706
O1    4    0.008730    0.786760   -0.352021    11.00000    0.06306    0.04029 =
         0.05833    0.01712    0.03619    0.01535
O2    4    0.057163    0.928960   -0.055492    11.00000    0.05204    0.05090 =
         0.06550   -0.01666    0.02837   -0.01177
O3    4    0.141868    0.617016    0.077522    11.00000    0.03235    0.09896 =
         0.05041    0.01113    0.00621   -0.01103
O4    4    0.228530    0.218627   -0.074399    11.00000    0.03599    0.07285 =
         0.05330    0.02674    0.00671    0.00975
HKLF    4

REM  RotaxE in P2(1)/n
REM R1 =  0.0542 for    5218 Fo > 4sig(Fo)  and  0.1121 for all    9102 data
REM    643 parameters refined using      0 restraints

END

WGHT      0.0705      0.0000

REM Highest difference peak  0.285,  deepest hole -0.215,  1-sigma level  0.043
Q1    1   0.6207  0.1437 -0.0673  11.00000  0.05    0.29
Q2    1   0.7289  0.0588 -0.0318  11.00000  0.05    0.25
Q3    1   1.2031  0.2834  0.3922  11.00000  0.05    0.20
Q4    1   1.0234  0.5244  0.2413  11.00000  0.05    0.18
Q5    1   1.0630  0.6781  0.3170  11.00000  0.05    0.17
;
_shelx_res_checksum   33731

_shelx_hkl_file
;
   0   0   2   85.47    5.39
   0   0  -2   88.63    5.51
   0   0   3    0.94    2.00
   0   0  -3   -0.64    1.81
   0   0   4  167.83    6.78
   0   0  -4  147.99    6.36
   0   0   5    1.60    2.25
   0   0  -5    0.54    1.97
   0   0   6  135.88    6.15
   0   0  -6  142.03    6.49
   0   0   7    1.76    1.60
   0   0  -7    1.46    1.53
   0   0   8  510.69   11.41
   0   0   9   -0.06    1.51
   0   0  10   15.56    2.28
   0   0  10   14.35    1.43
   0   0  10   10.02    2.17
   0   0  10   10.98    1.44
   0   0  11    0.30    2.18
   0   0  11   -1.10    1.39
   0   0  11   -0.62    1.06
   0   0  12  115.59    6.44
   0   0  12  131.58    5.66
   0   0  12  153.38    7.31
   0   0  12  141.97    6.39
   0   0 -12  117.09    6.72
   0   0  13   -1.95    1.91
   0   0  13    0.38    0.97
   0   0  13   -0.80    1.08
   0   0 -13   -0.63    1.68
   0   0  14   12.72    3.41
   0   0  14   15.12    1.70
   0   0  14   13.87    2.30
   0   0 -14   14.57    2.92
   0   0  15   -1.29    1.52
   0   0  15   -1.00    1.19
   0   0 -15    0.94    2.33
   0   0  16   33.41    2.86
   0   0  16   29.98    2.82
   0   0  17    0.70    1.15
   0   0  17    1.87    1.69
   0   0  18   11.18    1.67
   0   0  18   10.43    2.17
   0   0  19   -1.12    1.27
   0   0  19    1.01    1.83
   0   0  20   -2.22    1.61
   0   0  20    1.59    1.45
   0   0  21   -2.31    1.18
   0   0  21    2.36    2.31
   0   0  22    9.82    1.74
   0   0  22    9.67    1.93
   0   0  23    0.37    1.18
   0   0  23    0.65    2.24
   0   0  24    1.77    1.34
   0   0  24   -0.62    2.26
   0  -1   0    0.00    1.33
   0   1   0   -0.33    1.54
   0  -1   1  278.02   10.58
   0   1  -1  286.35   10.73
   0   1   1  264.05   10.29
   0  -1  -1  280.59   11.11
   0  -1   2   72.03    4.77
   0   1  -2   69.09    4.60
   0   1   2   69.64    4.81
   0  -1  -2   69.08    4.77
   0  -1   3  108.16    5.27
   0   1  -3  110.65    5.34
   0   1   3  118.47    5.53
   0  -1  -3  109.34    5.46
   0  -1   4   13.78    2.51
   0   1  -4   12.14    2.38
   0   1   4   16.42    2.38
   0  -1  -4   14.84    2.13
   0  -1   5   99.45    6.05
   0   1  -5   86.47    5.42
   0   1   5   96.96    6.09
   0  -1  -5   83.33    5.56
   0  -1   6  115.50    5.33
   0   1   6  108.73    5.36
   0   1  -6  102.96    6.20
   0  -1  -6  105.85    4.97
   0  -1   7   44.16    3.40
   0   1   7   46.95    3.34
   0   1  -7   41.20    3.48
   0  -1   8    9.90    1.93
   0   1   8   13.47    2.65
   0  -1   9    6.38    1.79
   0   1   9    6.66    1.93
   0  -1  10  153.28    6.94
   0   1  10  167.43    7.55
   0  -1  10  159.06    6.20
   0   1  10  165.56    6.30
   0  -1  10  183.28    8.22
   0   1  10  158.71    7.60
   0  -1  10  183.77    6.96
   0   1  10  166.68    6.45
   0  -1  11   11.41    2.62
   0   1  11   14.56    2.33
   0  -1  11   13.83    1.42
   0   1  11   14.18    1.48
   0   1  11   11.31    2.83
   0  -1  11   14.63    2.28
   0  -1  11   12.34    1.83
   0   1  11   12.08    1.45
   0  -1 -11    6.68    1.71
   0  -1  12  133.26    7.76
   0   1  12  116.88    7.13
   0  -1  12  155.80    6.58
   0   1  12  137.63    5.86
   0  -1  12  168.79    8.00
   0   1  12  167.32    7.98
   0  -1  12  137.39    6.26
   0   1  12  150.20    6.59
   0  -1 -12  134.59    8.44
   0  -1  13    5.70    2.70
   0   1  13    4.51    2.64
   0  -1  13    4.79    1.14
   0   1  13    5.17    1.23
   0  -1  13    6.02    1.81
   0   1  13    2.20    1.20
   0  -1 -13    3.06    1.55
   0  -1  14    9.84    3.38
   0   1  14   13.04    4.46
   0  -1  14   12.45    1.55
   0   1  14   11.25    1.41
   0  -1  14   12.92    1.75
   0   1  14   10.86    1.48
   0  -1 -14   11.67    2.80
   0  -1  15    7.52    1.43
   0   1  15    8.17    1.39
   0  -1  15    8.65    1.93
   0   1  15    8.22    1.50
   0  -1 -15    1.85    1.79
   0  -1  16    0.75    1.49
   0   1  16    2.59    1.81
   0  -1  16    1.06    1.43
   0   1  16   -3.04    1.67
   0  -1 -16   -1.35    1.77
   0  -1  17    0.97    1.09
   0   1  17   -0.13    1.70
   0  -1  17    2.67    1.99
   0   1  17    1.26    1.66
   0  -1 -17    0.96    1.98
   0  -1  18   13.59    1.79
   0   1  18   15.26    2.26
   0  -1  18   10.16    1.79
   0   1  18   12.47    1.92
   0  -1 -18    3.37    2.52
   0  -1  19   -1.99    1.45
   0   1  19   -0.49    1.13
   0  -1  19    0.39    1.52
   0   1  19    1.68    1.42
   0  -1  20   42.60    3.13
   0   1  20   46.22    3.72
   0  -1  20   37.24    2.85
   0   1  20   46.30    3.63
   0  -1  21    0.92    1.18
   0   1  21    2.05    1.70
   0  -1  21    2.00    2.04
   0   1  21    0.44    1.54
   0  -1  22    2.27    1.57
   0   1  22    3.15    1.60
   0  -1  22    4.99    2.11
   0   1  22    4.70    1.94
   0  -1  23    0.43    1.53
   0   1  23   -1.15    1.17
   0  -1  23    0.59    2.25
   0   1  23    3.70    2.16
   0  -1  24    3.40    1.61
   0   1  24    1.59    1.60
   0  -1  24   -2.35    2.19
   0   1  24    0.47    2.40
   0  -2   0   36.39    3.19
   0   2   0   40.00    3.19
   0   2   1   71.01    4.91
   0  -2   1   77.69    5.14
   0   2  -1   76.04    5.06
   0   2   1   74.11    5.14
   0  -2   2  168.51    6.82
   0   2  -2  156.75    6.46
   0   2   2  163.18    6.90
   0  -2  -2  156.48    6.82
   0  -2   3 1719.40   23.22
   0   2  -3 1704.27   23.72
   0  -2  -3 1764.82   25.09
   0  -2   4   54.20    3.64
   0   2  -4   54.48    3.55
   0   2   4   54.91    3.84
   0  -2  -4   54.54    3.52
   0  -2   5    0.04    2.02
   0   2  -5   -0.09    1.77
   0   2   5   -0.37    2.25
   0  -2  -5    0.46    2.14
   0  -2   6  127.39    5.79
   0   2  -6  104.91    4.70
   0   2   6  131.48    5.88
   0  -2  -6  103.71    6.42
   0  -2   7  190.67    8.06
   0   2  -7  171.19    7.39
   0   2   7  201.82    8.56
   0  -2   8  142.73    6.02
   0   2   8  145.49    6.26
   0  -2   9   62.12    4.31
   0   2   9   56.61    3.58
   0  -2   9   55.92    2.47
   0  -2  -9   56.44    2.93
   0  -2  10  161.92    7.77
   0   2  10  175.88    7.88
   0  -2  10  182.34    6.61
   0   2  10  162.23    6.21
   0  -2  10  188.21    8.02
   0   2  10  149.39    7.61
   0  -2  10  174.20    7.07
   0   2  10  161.53    6.83
   0  -2 -10  179.29    8.58
   0  -2  11   17.54    2.38
   0   2  11   16.59    2.44
   0  -2  11   21.94    2.23
   0   2  11   17.82    1.61
   0   2  11   19.64    2.68
   0  -2 -11   14.53    2.40
   0  -2  11   17.77    1.63
   0   2  11   18.09    2.20
   0  -2 -11   18.95    2.37
   0  -2  12    2.42    2.42
   0   2  12    2.53    2.47
   0  -2  12    3.54    1.10
   0   2  12    3.83    1.60
   0  -2 -12    2.45    1.87
   0  -2  12    2.60    1.56
   0   2  12    6.26    1.66
   0  -2 -12   -0.16    1.39
   0  -2  13   50.26    4.89
   0   2  13   53.92    5.18
   0  -2  13   76.17    5.62
   0   2  13   67.44    5.10
   0  -2  13   62.13    4.92
   0   2  13   74.40    5.69
   0  -2 -13   64.43    6.56
   0  -2  14   -0.65    3.43
   0  -2  14    0.75    1.05
   0   2  14   -0.97    1.31
   0  -2  14    1.70    1.23
   0   2  14    1.09    1.62
   0  -2 -14    0.08    1.62
   0  -2  15    1.45    1.76
   0   2  15   -0.59    1.03
   0  -2  15   -0.96    1.60
   0   2  15    2.79    1.70
   0  -2 -15   -1.45    2.12
   0  -2  16    6.97    1.73
   0   2  16    8.56    1.41
   0  -2  16   10.22    1.99
   0   2  16   11.50    2.15
   0  -2 -16    4.34    2.58
   0  -2  17    3.15    1.57
   0   2  17    2.94    1.68
   0  -2  17    6.33    1.56
   0   2  17    6.36    1.76
   0  -2 -17    4.28    2.65
   0  -2  18   68.82    4.96
   0   2  18   65.44    4.81
   0  -2  18   63.80    4.98
   0   2  18   58.10    4.48
   0  -2 -18   38.29    6.45
   0  -2  19   -0.22    1.43
   0   2  19   -0.72    1.50
   0  -2  19    6.39    2.21
   0   2  19    6.95    1.91
   0  -2 -19    5.52    2.38
   0  -2  20   -2.04    1.53
   0  -2  20   -1.99    2.07
   0   2  20    3.70    1.54
   0  -2  21   -0.45    1.46
   0   2  21    3.81    1.65
   0  -2  21    3.66    2.17
   0   2  21    4.69    1.85
   0  -2  22   -0.17    1.17
   0  -2  22   -1.47    2.11
   0   2  22    2.78    1.56
   0  -2  23    0.02    1.21
   0   2  23    0.79    1.49
   0  -2  23   -3.67    2.17
   0  -2  24    1.91    1.43
   0   2  24    0.97    1.63
   0  -2  24    6.89    2.68
   0  -3   0   -0.74    1.39
   0   3   0   -0.52    1.25
   0  -3   1    9.32    2.44
   0   3   1    8.91    2.28
   0   3  -1    9.61    1.75
   0   3   1    7.24    2.31
   0   3  -2 1170.18   17.92
   0   3   2 1217.07   19.02
   0  -3   3    1.92    1.53
   0   3  -3    2.97    1.36
   0   3   3    3.63    1.70
   0  -3  -3    4.09    2.29
   0  -3   4  204.63    8.43
   0   3  -4  192.80    8.15
   0   3   4  199.40    8.46
   0  -3  -4  190.73    8.52
   0  -3   5  225.97    9.12
   0   3  -5  213.63    8.79
   0   3   5  233.78    9.33
   0  -3   6   88.52    5.36
   0   3  -6   70.90    4.77
   0   3   6   77.78    5.04
   0  -3   7   20.76    2.33
   0   3   7   17.52    2.32
   0  -3   8    0.18    1.46
   0   3   8   -0.05    2.10
   0  -3  -8    2.41    1.21
   0  -3  -8    1.26    1.21
   0  -3   9    2.23    1.61
   0   3   9    0.70    1.59
   0  -3   9    4.66    1.01
   0   3   9    3.40    1.09
   0  -3   9    5.52    1.21
   0  -3  -9    2.06    1.34
   0  -3  -9    3.26    1.71
   0  -3  10    2.60    2.30
   0   3  10    3.11    1.76
   0   3  10    3.00    1.40
   0  -3 -10    2.42    1.26
   0  -3  10    2.50    1.53
   0   3  10    1.39    1.33
   0  -3 -10    2.85    2.00
   0  -3 -10    2.42    1.31
   0  -3  11   68.23    4.73
   0   3  11   59.19    4.41
   0  -3  11   70.75    3.44
   0   3  11   60.68    3.27
   0  -3 -11   65.75    4.18
   0  -3  11   57.62    3.22
   0   3  11   66.38    3.60
   0  -3 -11   77.57    6.11
   0  -3  12   -0.46    1.83
   0   3  12    1.24    2.83
   0  -3  12    1.05    0.97
   0   3  12    1.59    1.20
   0  -3 -12    0.35    1.33
   0  -3  12    2.65    1.60
   0   3  12    3.24    1.11
   0  -3 -12   -0.42    1.51
   0  -3  13   21.27    3.10
   0   3  13   15.24    2.86
   0  -3  13   23.36    2.34
   0   3  13   18.99    2.25
   0  -3 -13   24.49    2.62
   0  -3  13   24.35    2.29
   0   3  13   24.11    2.35
   0  -3 -13   17.47    2.52
   0  -3  14    6.76    1.28
   0   3  14    8.91    1.67
   0  -3 -14    5.91    1.81
   0  -3  14    5.80    1.89
   0   3  14    5.55    1.29
   0  -3  15    0.04    0.98
   0   3  15    0.95    1.11
   0  -3  15    0.20    1.74
   0   3  15    0.24    1.14
   0  -3 -15   -2.65    1.75
   0  -3  16    1.41    1.08
   0   3  16    0.88    1.13
   0  -3  16    0.86    1.70
   0   3  16    1.17    1.71
   0  -3 -16    3.02    2.56
   0  -3  17   22.74    2.67
   0   3  17   25.29    3.12
   0  -3  17   23.65    3.24
   0   3  17   25.17    3.17
   0  -3 -17   14.03    4.26
   0  -3  18   10.63    1.46
   0   3  18    8.75    1.41
   0  -3  18    9.34    1.76
   0   3  18    9.48    1.61
   0  -3 -18    7.91    2.74
   0  -3  19   38.05    2.57
   0   3  19   35.68    2.60
   0  -3  19   41.85    3.25
   0   3  19   37.81    3.01
   0  -3 -19   25.13    5.64
   0  -3  20    8.27    1.41
   0   3  20   10.26    1.46
   0  -3  20   16.87    2.61
   0   3  20    5.68    1.93
   0  -3  21    0.31    1.28
   0   3  21    1.10    1.64
   0  -3  21   -1.72    2.16
   0   3  21    3.85    2.50
   0  -3  22    0.28    1.45
   0   3  22    2.10    1.33
   0  -3  22    3.17    2.31
   0  -3  23    9.77    1.81
   0   3  23    6.85    1.78
   0  -3  23    1.49    2.52
   0   3  23    0.40    2.62
   0   4   0  357.95    9.32
   0   4   0  374.43    9.53
   0  -4   1   -1.13    1.99
   0   4   1    2.41    1.41
   0   4  -1    1.15    1.73
   0   4   1    0.06    1.94
   0  -4   2   11.66    2.44
   0   4   2   10.41    2.40
   0   4  -2    8.67    2.08
   0   4   2   10.49    2.42
   0   4   3    2.84    2.16
   0  -4   3    2.20    2.12
   0   4  -3    2.92    1.93
   0   4   3    2.91    1.50
   0  -4   4    3.06    1.53
   0   4  -4    1.68    1.33
   0   4   4    4.05    1.68
   0  -4   5  109.93    5.17
   0   4  -5   94.72    6.00
   0   4   5  107.37    4.62
   0  -4   6  187.64    7.97
   0   4   6  193.70    8.49
   0  -4   7   -0.29    2.15
   0   4   7   -3.01    2.12
   0  -4   7    0.41    0.82
   0  -4  -7    0.01    1.17
   0  -4  -7    0.94    1.76
   0  -4  -7    0.57    1.15
   0  -4   8    1.59    1.50
   0   4   8   -0.78    1.57
   0  -4   8    1.15    0.89
   0   4   8    1.60    1.54
   0  -4  -8   -1.32    1.59
   0  -4  -8    1.14    1.26
   0  -4  -8    0.17    1.25
   0  -4   9    2.10    1.56
   0   4   9    1.65    2.43
   0  -4   9    2.83    1.26
   0   4   9    3.74    1.39
   0  -4  -9   -0.31    1.65
   0  -4   9    1.03    1.46
   0   4   9    2.30    1.87
   0  -4  -9    0.49    1.30
   0  -4  -9    3.78    1.73
   0  -4  10    0.15    1.60
   0   4  10   -0.96    2.35
   0  -4  10    0.33    0.96
   0   4  10    0.64    1.40
   0  -4 -10    0.86    1.73
   0  -4  10   -0.73    1.31
   0   4  10    1.11    1.08
   0  -4 -10    0.66    1.38
   0  -4 -10   -1.44    1.26
   0  -4  11   -1.92    2.49
   0   4  11    0.49    2.56
   0  -4  11   -1.31    1.06
   0   4  11    1.02    1.00
   0  -4 -11   -1.68    1.70
   0  -4  11   -0.85    1.47
   0   4  11    0.28    0.98
   0  -4  12    0.69    3.01
   0   4  12    1.25    1.99
   0  -4  12    3.83    1.05
   0   4  12    2.51    1.15
   0  -4 -12    3.79    3.12
   0  -4  12    1.32    1.44
   0   4  12    2.45    1.50
   0  -4 -12    2.82    1.68
   0  -4  13    4.32    2.54
   0  -4  13    3.06    1.01
   0   4  13    4.85    1.23
   0  -4 -13    0.76    2.04
   0  -4  13    3.01    2.35
   0   4  13    3.50    1.49
   0  -4 -13    2.25    1.69
   0  -4  14   11.78    1.36
   0  -4 -14    8.90    2.20
   0  -4  14   13.10    2.10
   0   4  14    9.84    1.64
   0  -4  15    4.44    1.15
   0   4  15    2.07    1.21
   0  -4 -15    5.64    1.73
   0  -4  15    2.82    1.39
   0   4  15    3.76    1.28
   0  -4 -15   -0.22    2.57
   0  -4  16   13.38    2.08
   0   4  16   14.32    2.03
   0  -4  16    8.59    1.68
   0   4  16   10.14    2.01
   0  -4 -16    7.56    2.19
   0  -4  17    9.57    1.52
   0   4  17    8.30    1.46
   0  -4  17    6.46    1.67
   0   4  17    6.28    2.07
   0  -4 -17    6.26    3.20
   0  -4  18    2.02    1.17
   0   4  18   -0.96    1.17
   0  -4  18   -0.29    2.05
   0   4  18    1.96    1.63
   0  -4 -18    2.69    2.67
   0  -4  19    2.27    1.51
   0   4  19   -0.09    1.47
   0  -4  19    1.45    1.71
   0   4  19   -1.43    1.35
   0  -4 -19   -1.06    2.77
   0  -4  20   11.60    1.59
   0   4  20   10.37    1.66
   0  -4  20    8.17    3.78
   0   4  20   10.82    1.82
   0  -4  21    1.79    1.52
   0   4  21    1.84    1.46
   0  -4  21    0.60    2.16
   0  -4  22    7.52    1.51
   0   4  22    6.28    1.70
   0  -4  22    3.23    2.64
   0  -4  23    2.06    1.94
   0   4  23    0.80    1.68
   0  -4  23    0.14    2.85
   0   5   0    0.49    2.08
   0   5   1    5.79    2.26
   0   5  -1    3.48    2.16
   0  -5   2   24.00    2.87
   0   5   2   18.55    2.27
   0  -5   3   34.76    3.22
   0   5   3   32.95    3.18
   0  -5   4   -0.53    2.07
   0   5   4   -0.08    2.02
   0  -5   5  117.44    5.90
   0   5   5  122.52    6.12
   0  -5  -5  106.03    5.39
   0  -5  -5  139.12    5.71
   0  -5   6    1.62    2.00
   0   5   6    1.95    1.58
   0  -5  -6    1.62    1.06
   0  -5   6    1.59    1.29
   0  -5  -6    1.45    1.10
   0  -5  -6    0.72    1.62
   0  -5  -6    0.87    1.21
   0  -5  -6   -1.43    1.52
   0  -5   7   68.12    4.53
   0   5   7   57.64    4.10
   0  -5  -7   59.52    3.62
   0  -5   7   65.51    3.56
   0  -5  -7   74.90    4.42
   0  -5  -7   72.46    4.16
   0  -5  -7   84.58    4.72
   0  -5  -7   71.24    4.15
   0  -5   8  166.68    8.00
   0   5   8  159.74    8.47
   0  -5   8  155.29    6.48
   0  -5  -8  166.41    7.46
   0  -5   8  150.43    6.50
   0  -5   8  143.02    6.77
   0  -5  -8  187.45    8.46
   0  -5   9    5.11    2.01
   0   5   9    3.99    2.52
   0  -5   9    4.94    1.23
   0   5   9    4.98    1.14
   0  -5  -9    5.63    1.84
   0  -5   9    4.53    1.26
   0  -5  -9   10.35    2.16
   0  -5  -9    7.36    1.52
   0  -5  10    8.98    2.67
   0   5  10    7.96    2.77
   0  -5  10    6.38    1.31
   0   5  10    6.02    1.64
   0  -5 -10    4.82    1.84
   0  -5  10    6.42    1.35
   0   5  10    5.71    1.39
   0  -5 -10    6.05    1.65
   0  -5 -10    6.73    1.99
   0  -5  11   39.65    4.68
   0   5  11   41.72    4.78
   0  -5  11   48.75    3.82
   0   5  11   42.74    3.53
   0  -5 -11   37.59    3.69
   0  -5  11   45.41    3.83
   0   5  11   39.75    3.65
   0  -5 -11   53.33    5.13
   0  -5  12    0.68    2.50
   0  -5  12   -0.05    0.92
   0   5  12    0.99    1.09
   0  -5 -12    1.29    1.42
   0  -5  12    0.57    1.23
   0   5  12    0.17    1.51
   0  -5 -12    1.91    1.65
   0  -5  13    3.12    1.08
   0   5  13    2.15    1.18
   0  -5 -13    2.21    1.55
   0  -5  13    3.11    1.97
   0   5  13    2.71    1.87
   0  -5 -13    3.23    1.79
   0   5  14   35.72    2.60
   0  -5 -14   34.71    3.31
   0  -5  14   44.03    3.36
   0   5  14   31.66    2.87
   0  -5 -14   38.13    4.13
   0  -5  15    9.72    2.42
   0   5  15   11.50    2.08
   0  -5 -15    9.02    1.95
   0  -5  15   16.67    3.25
   0   5  15   10.38    1.81
   0  -5 -15    5.74    2.67
   0  -5  16   78.30    5.70
   0   5  16   89.58    6.37
   0  -5  16   83.42    6.38
   0   5  16   68.81    5.67
   0  -5 -16   62.29    7.37
   0  -5  17   19.43    2.17
   0   5  17   19.62    2.34
   0  -5  17    6.38    2.21
   0   5  17   18.00    2.55
   0  -5 -17    6.00    2.30
   0  -5  18   10.18    1.93
   0   5  18    7.45    1.47
   0  -5  18    3.09    2.92
   0  -5 -18    1.89    2.23
   0  -5  19   11.23    2.00
   0   5  19    8.40    1.73
   0  -5  19    0.89    1.98
   0   5  19    9.87    2.33
   0  -5 -19    7.01    2.53
   0  -5  20    2.15    1.32
   0   5  20   -1.01    1.45
   0  -5 -20    2.18    3.17
   0  -5  21   -0.04    1.28
   0  -5  21    0.09    2.65
   0  -5  22    3.12    1.68
   0   5  22    3.72    1.52
   0  -5  22   -3.11    3.02
   0   6   0   13.74    2.53
   0  -6   0   18.96    1.80
   0   6   1   89.56    5.62
   0   6  -1   73.51    4.87
   0  -6  -1   86.55    4.43
   0  -6   1   87.53    4.51
   0   6   2  108.06    4.87
   0  -6   2  104.39    5.10
   0  -6  -2  126.16    5.26
   0  -6   2  110.95    4.76
   0  -6   3  188.77    8.36
   0   6   3  182.75    8.14
   0  -6  -3  184.87    7.31
   0  -6   3  196.05    7.11
   0  -6  -3  200.03    7.56
   0  -6   3  192.83    7.20
   0  -6   4  115.49    6.30
   0   6   4  102.54    6.07
   0  -6  -4  105.20    5.24
   0  -6   4  106.96    5.08
   0  -6  -4  103.59    5.59
   0  -6   4  105.35    5.10
   0  -6  -4  123.41    5.41
   0  -6  -4  119.77    5.30
   0  -6   5   92.49    5.41
   0  -6  -5   87.13    4.52
   0  -6   5  107.10    4.79
   0  -6  -5   92.90    4.72
   0  -6   5   87.36    4.13
   0  -6  -5  114.08    5.44
   0  -6  -5  111.94    5.51
   0  -6  -5  102.27    5.27
   0  -6   6    2.86    1.79
   0   6   6    2.87    1.67
   0  -6  -6    1.88    1.04
   0  -6   6    3.42    1.27
   0  -6  -6    6.82    1.35
   0  -6   6    4.54    1.01
   0  -6  -6    4.83    1.30
   0  -6  -6    2.78    1.39
   0  -6  -6    4.12    1.30
   0  -6   7   19.81    3.33
   0   6   7   12.73    2.78
   0  -6  -7   20.82    2.03
   0  -6   7   23.04    2.39
   0  -6  -7   21.22    2.48
   0  -6   7   23.73    2.28
   0  -6  -7   24.96    2.55
   0  -6  -7   12.55    2.13
   0  -6  -7   21.91    2.38
   0  -6   8   13.65    3.04
   0   6   8   12.05    2.38
   0  -6  -8    9.32    1.48
   0  -6   8   15.86    1.58
   0  -6  -8   13.44    1.65
   0  -6   8   12.88    1.39
   0  -6  -8   14.61    1.81
   0  -6  -8   13.34    1.73
   0  -6  -8   14.03    2.00
   0  -6   9    1.26    2.33
   0   6   9    5.20    2.07
   0  -6   9    8.18    1.47
   0   6   9    3.79    1.44
   0  -6  -9    5.50    1.85
   0  -6   9    5.95    1.56
   0  -6   9    2.58    1.38
   0  -6  -9    7.65    1.67
   0  -6  -9    5.95    1.97
   0  -6  10   38.01    3.21
   0   6  10   31.87    2.92
   0  -6 -10   36.96    3.82
   0  -6  10   24.99    3.75
   0  -6 -10   48.64    5.24
   0  -6 -10   41.34    3.71
   0  -6  11    4.80    1.40
   0   6  11    3.63    1.19
   0  -6 -11    2.84    2.21
   0  -6  11    2.88    1.40
   0  -6 -11    5.88    2.24
   0  -6  12   -0.73    1.00
   0   6  12   -0.06    1.85
   0  -6 -12   -1.34    1.46
   0  -6  12    1.91    1.77
   0  -6 -12    1.69    1.70
   0  -6  13    0.93    1.02
   0   6  13    2.41    1.21
   0  -6 -13   -1.32    1.64
   0  -6  13   -0.86    1.42
   0  -6 -13   -0.96    1.77
   0  -6  14   10.20    1.63
   0   6  14    9.78    1.51
   0  -6 -14    9.15    2.33
   0  -6  14    6.24    2.36
   0  -6 -14   10.70    2.42
   0  -6  15   15.07    2.37
   0   6  15   15.13    2.33
   0  -6 -15   17.06    2.78
   0  -6  15    8.11    2.28
   0  -6 -15   16.81    2.96
   0  -6  16    8.40    1.43
   0   6  16    7.39    1.43
   0  -6 -16    8.84    2.09
   0  -6  16    2.90    2.04
   0  -6 -16   13.78    3.12
   0  -6  17    1.89    1.26
   0   6  17    1.70    1.58
   0  -6  17    3.55    2.47
   0  -6 -17   -2.83    2.05
   0  -6  18   -0.08    1.50
   0  -6  18    1.24    1.92
   0  -6 -18   -0.37    2.89
   0  -6  19    4.02    1.58
   0   6  19    3.73    1.62
   0  -6  19    3.69    2.70
   0  -6 -19    1.90    3.09
   0  -6  20    1.34    1.57
   0   6  20    1.35    1.73
   0  -6  20   -0.42    2.68
   0  -6 -20    0.37    2.55
   0  -6  21   -0.17    1.53
   0   6  21    0.96    1.77
   0  -6  21    1.07    2.88
   0  -6  22    1.69    1.91
   0   7   0    0.24    1.81
   0  -7   0   -0.68    1.34
   0  -7   0    0.95    1.55
   0   7   1   11.28    2.12
   0   7  -1   11.56    2.49
   0  -7  -1   11.77    1.45
   0  -7   1   11.17    1.47
   0  -7  -1   12.02    1.47
   0  -7   1   11.26    1.63
   0  -7  -1   12.32    1.54
   0   7   2    9.46    2.42
   0   7  -2    7.12    2.75
   0  -7  -2    8.26    1.33
   0  -7   2    6.26    1.12
   0  -7  -2    6.32    1.27
   0  -7   2    8.69    1.27
   0  -7  -2    6.61    1.79
   0  -7  -2    7.12    1.52
   0   7   3   -1.35    1.58
   0   7  -3    1.23    1.74
   0  -7  -3   -0.80    1.02
   0  -7   3   -0.16    0.87
   0  -7  -3    1.28    1.44
   0  -7   3    0.44    1.43
   0  -7  -3    1.11    1.47
   0  -7  -3    0.49    1.50
   0   7   4    9.83    2.27
   0  -7  -4    9.35    1.70
   0  -7   4    5.93    1.10
   0  -7  -4    8.17    1.68
   0  -7   4    6.14    1.42
   0  -7  -4    9.31    1.86
   0  -7  -4    6.27    1.64
   0  -7  -4    9.72    1.84
   0  -7   5   81.52    4.93
   0  -7  -5   88.81    3.91
   0  -7   5   86.03    3.50
   0  -7  -5   88.24    3.91
   0  -7   5   90.47    3.65
   0  -7  -5   92.08    4.54
   0  -7  -5  101.81    4.41
   0  -7  -5  100.02    5.16
   0  -7   6    7.29    2.21
   0   7   6    9.54    2.82
   0  -7  -6   10.85    1.61
   0  -7   6    9.51    1.41
   0  -7  -6    8.02    1.48
   0  -7   6   14.20    1.84
   0  -7  -6   11.97    2.07
   0  -7  -6   16.73    2.49
   0  -7  -6    7.59    1.43
   0   7   7   42.06    4.94
   0  -7  -7   42.87    3.65
   0  -7   7   41.20    3.32
   0  -7  -7   55.06    4.59
   0  -7   7   41.61    3.62
   0  -7  -7   47.62    4.93
   0  -7  -7   36.08    3.78
   0  -7  -7   43.77    4.19
   0   7   8    1.11    3.10
   0  -7   8    7.81    1.49
   0  -7  -8    5.20    1.45
   0  -7   8    3.45    1.01
   0  -7  -8    6.96    2.05
   0  -7  -8    0.73    1.81
   0  -7  -8    2.47    1.38
   0  -7   9    0.68    0.94
   0   7   9   -1.00    0.99
   0  -7  -9    0.64    1.37
   0  -7  -9   -0.13    1.58
   0  -7  -9   -2.78    1.28
   0  -7  10    7.70    1.68
   0   7  10    5.91    1.27
   0  -7 -10    4.74    2.04
   0  -7 -10    6.86    1.94
   0  -7 -10    4.61    1.58
   0  -7  11   11.86    1.71
   0   7  11    7.99    1.59
   0  -7 -11   11.99    1.81
   0  -7 -11    3.40    2.52
   0  -7  12   11.91    1.62
   0   7  12   11.24    1.87
   0  -7 -12   10.48    2.29
   0  -7 -12    6.59    2.07
   0  -7  13   10.58    1.71
   0   7  13    8.04    1.38
   0  -7 -13    8.46    1.82
   0  -7 -13    5.77    2.23
   0  -7  14   37.31    2.64
   0   7  14   39.69    3.05
   0  -7 -14   33.03    3.22
   0  -7 -14   19.72    4.86
   0  -7  15    4.61    1.63
   0   7  15    2.46    1.39
   0  -7 -15   -0.79    2.19
   0  -7  15   -2.15    1.73
   0  -7 -15   -3.47    2.66
   0  -7  16   10.77    1.88
   0   7  16    7.66    1.66
   0  -7 -16    6.86    2.36
   0  -7  16    4.18    2.91
   0  -7 -16    8.15    2.43
   0  -7  17    7.46    1.77
   0   7  17    7.43    1.65
   0  -7 -17    6.00    3.00
   0  -7  18    3.13    1.58
   0   7  18    0.75    1.36
   0  -7 -18   -2.51    2.24
   0  -7  19    0.83    1.78
   0   7  19   -0.70    1.67
   0  -7 -19   -2.17    2.31
   0  -7  20    1.73    1.55
   0   7  20    1.45    1.94
   0  -7 -20    1.05    2.99
   0   8   0   73.72    6.55
   0  -8   0   85.53    6.49
   0  -8   0   85.99    6.43
   0   8   1    5.71    2.12
   0   8  -1    6.85    2.54
   0  -8  -1    6.74    1.61
   0  -8   1    9.40    1.40
   0  -8  -1    6.85    1.36
   0  -8   1    8.14    1.68
   0   8   2   26.25    3.37
   0   8  -2   14.80    2.77
   0  -8  -2   26.12    5.14
   0  -8   2   22.70    2.29
   0  -8  -2   26.76    2.54
   0  -8   2   26.57    2.64
   0  -8  -2   25.50    2.69
   0   8   3    2.10    2.07
   0  -8  -3   -0.58    1.13
   0  -8   3    1.19    1.00
   0  -8  -3   -0.13    1.23
   0  -8   3    0.03    1.53
   0  -8  -3    0.62    1.45
   0  -8  -3    0.68    1.50
   0   8   4    7.13    2.36
   0  -8  -4   12.12    1.87
   0  -8   4   10.49    1.32
   0  -8  -4   15.13    1.88
   0  -8   4   12.65    1.60
   0  -8  -4   14.55    2.04
   0  -8  -4   13.24    2.38
   0  -8  -4   13.21    2.06
   0   8   5    2.47    2.35
   0  -8  -5    3.13    1.70
   0  -8   5    1.32    1.25
   0  -8  -5    2.21    1.90
   0  -8   5    3.88    1.59
   0  -8  -5    3.14    1.45
   0  -8  -5    3.01    1.92
   0  -8  -5    2.21    1.32
   0  -8  -6   49.26    3.44
   0  -8   6   50.23    3.09
   0  -8  -6   53.13    3.48
   0  -8   6   53.43    3.50
   0  -8  -6   57.52    4.40
   0  -8  -6   55.39    3.66
   0  -8  -6   54.34    3.70
   0  -8  -7    5.45    1.80
   0  -8   7    6.64    1.21
   0  -8  -7    7.32    2.13
   0  -8   7    5.59    1.46
   0  -8  -7    8.66    2.23
   0  -8  -7    1.60    1.87
   0  -8  -7    5.73    1.92
   0  -8   8   13.17    1.44
   0  -8  -8    9.24    2.13
   0  -8   8   12.65    1.80
   0  -8  -8   13.52    2.43
   0  -8  -8   12.81    2.31
   0  -8  -8   14.91    2.06
   0  -8   9    1.51    1.00
   0   8   9   -1.31    1.50
   0  -8  -9   -2.96    1.49
   0  -8   9   -0.18    1.31
   0  -8  -9    1.11    1.74
   0  -8  -9    0.76    1.37
   0  -8  10    0.97    1.31
   0   8  10    2.74    1.20
   0  -8 -10    1.23    1.60
   0  -8 -10    7.62    2.40
   0  -8  11   -0.73    1.33
   0   8  11    0.79    1.33
   0  -8 -11    4.57    2.14
   0  -8 -11    0.06    2.48
   0  -8  12    3.69    1.17
   0   8  12    3.40    1.55
   0  -8 -12   11.41    2.38
   0  -8 -12    4.03    2.26
   0  -8  13   -1.04    1.04
   0   8  13   -0.74    1.16
   0  -8 -13    2.26    1.72
   0  -8 -13    3.18    3.02
   0  -8  14    2.03    1.26
   0   8  14    0.11    1.55
   0  -8 -14    1.53    1.83
   0  -8 -14    7.35    3.22
   0  -8  15    3.54    1.54
   0   8  15    5.20    1.70
   0  -8 -15    2.08    2.02
   0  -8 -15   -2.63    2.72
   0  -8  16    0.04    2.20
   0   8  16    1.43    1.50
   0  -8 -16   -0.71    2.22
   0  -8 -16   -4.10    2.92
   0   8  17    0.26    1.78
   0  -8 -17    3.06    2.54
   0   8  18    1.36    1.81
   0  -8 -18    4.03    3.01
   0  -8  19   -1.03    1.69
   0  -8 -19   -0.46    2.66
   0  -9   0    2.00    1.50
   0  -9   0    1.04    1.25
   0  -9  -1    7.24    1.71
   0  -9   1    9.17    1.56
   0  -9  -1    9.78    1.65
   0  -9   1   10.42    1.90
   0  -9  -2    1.09    1.63
   0  -9   2    0.79    1.16
   0  -9  -2    4.09    1.75
   0  -9   2    1.64    1.56
   0  -9  -3    1.88    1.25
   0  -9   3    0.73    1.08
   0  -9  -3    2.54    1.95
   0  -9   3    2.21    1.27
   0  -9  -3   -1.25    2.24
   0  -9  -3    2.69    1.62
   0  -9  -4    8.40    1.58
   0  -9   4    8.29    1.65
   0  -9  -4   10.83    2.12
   0  -9   4   10.22    1.57
   0  -9  -4    2.51    2.17
   0  -9  -4   11.87    2.19
   0  -9  -4   10.80    1.75
   0  -9  -5   -1.30    1.14
   0  -9   5    0.42    1.35
   0  -9  -5   -2.24    1.90
   0  -9   5    1.36    1.23
   0  -9  -5   -1.42    2.16
   0  -9  -5    3.38    1.66
   0  -9  -5    2.20    1.38
   0  -9  -6    9.47    2.04
   0  -9   6   10.27    1.79
   0  -9  -6   14.60    2.40
   0  -9   6    8.33    1.45
   0  -9  -6   10.71    3.39
   0  -9  -6    6.36    1.73
   0  -9  -6   10.79    2.16
   0  -9  -7    4.45    2.28
   0  -9   7    2.64    1.09
   0  -9  -7    2.00    1.55
   0  -9   7    2.45    1.27
   0  -9  -7    2.13    2.40
   0  -9  -7    1.74    1.64
   0  -9  -7    2.86    2.00
   0  -9   8    0.29    1.11
   0   9   8    0.12    1.11
   0  -9  -8    2.78    2.11
   0  -9   8    0.98    1.45
   0  -9  -8    0.70    1.79
   0  -9  -8   -0.26    1.39
   0  -9   9    2.27    1.50
   0   9   9    3.85    1.41
   0  -9  -9    4.43    1.65
   0  -9  -9    2.31    2.33
   0  -9  10    4.09    1.19
   0   9  10    6.13    1.68
   0  -9 -10    4.77    1.74
   0  -9 -10    5.18    2.83
   0  -9  11    7.09    1.34
   0   9  11    6.32    1.42
   0  -9 -11    8.36    1.88
   0  -9 -11    2.68    2.67
   0  -9  12   -1.16    1.59
   0   9  12    1.90    1.34
   0  -9 -12    0.58    1.84
   0  -9 -12   -2.75    2.03
   0  -9  13   13.06    2.00
   0   9  13   15.19    2.37
   0  -9 -13    1.66    3.06
   0  -9  14   20.20    2.06
   0   9  14   19.80    2.38
   0  -9 -14   17.72    5.62
   0  -9 -14    9.28    3.08
   0  -9  15    1.41    1.54
   0   9  15   -0.16    1.61
   0  -9 -15    0.17    2.57
   0  -9  16   -0.38    1.60
   0  -9 -16   -2.46    2.95
   0  -9 -16    2.77    2.44
   0  -9  17   11.76    1.91
   0  -9 -17    4.35    3.68
   0  -9  18    1.50    1.95
   0  -9 -18   -1.53    2.86
   0 -10   0   24.66    2.87
   0 -10   0   21.55    2.37
   0 -10  -1   -1.61    1.85
   0 -10   1    1.95    2.24
   0 -10  -1   -1.19    1.34
   0 -10   1    0.06    1.41
   0 -10  -2    6.89    1.54
   0 -10   2    5.41    1.63
   0 -10  -2    4.08    1.49
   0 -10   2    5.91    2.01
   0 -10  -2    6.41    1.89
   0 -10  -3    1.87    2.42
   0 -10   3    3.53    1.85
   0 -10  -3    1.66    2.03
   0 -10   3    3.54    1.50
   0 -10  -3    2.21    2.11
   0 -10  -4   -1.47    1.67
   0 -10   4   -0.07    1.35
   0 -10  -4   -2.21    1.41
   0 -10   4   -0.79    1.32
   0 -10  -4    1.96    1.61
   0 -10  -5    0.17    1.34
   0 -10   5   -1.60    1.53
   0 -10  -5   -1.43    1.38
   0 -10   5   -1.74    1.90
   0 -10  -5    3.51    2.32
   0 -10  -5   -0.22    1.80
   0 -10  -6    2.11    1.69
   0 -10   6   -1.82    1.52
   0 -10  -6    5.21    1.67
   0 -10   6    1.20    1.55
   0 -10  -6   -1.91    1.91
   0 -10   7    0.59    1.70
   0  10   7    0.74    1.68
   0 -10  -7    3.98    1.70
   0 -10   7   -0.58    1.36
   0 -10  -7    0.03    1.91
   0 -10  -7    3.55    1.67
   0 -10   8   10.89    1.86
   0  10   8    8.96    1.65
   0 -10  -8   10.70    2.29
   0 -10   8   10.80    1.91
   0 -10  -8    7.02    3.16
   0 -10   9    7.00    1.49
   0  10   9    6.01    1.82
   0 -10  -9    6.26    1.84
   0 -10  -9    3.50    2.90
   0 -10  10    4.56    1.37
   0  10  10    1.20    1.49
   0 -10 -10    8.27    2.56
   0 -10 -10    0.68    2.34
   0 -10  11    2.19    1.29
   0  10  11    0.06    1.86
   0 -10 -11    1.86    2.23
   0 -10 -11    1.31    2.24
   0 -10  12   12.10    2.05
   0 -10 -12   11.19    2.46
   0 -10 -12    2.94    2.62
   0 -10  13    3.58    1.70
   0 -10 -13    8.25    2.75
   0 -10 -13    3.21    2.80
   0 -10  14   -0.24    2.03
   0 -10 -14   -2.22    2.62
   0 -10 -14    2.52    2.40
   0 -10 -15    6.17    2.81
   0 -10 -15    0.34    2.46
   0 -10 -16    0.87    3.53
   0 -10 -17   -0.49    2.96
   0 -11   0   -1.09    1.82
   0 -11   0   -0.33    1.93
   0 -11   0    0.92    1.81
   0 -11  -1    9.32    1.91
   0 -11   1    7.30    1.68
   0 -11   1   13.68    2.18
   0 -11  -1    8.74    1.98
   0 -11  -2    1.37    1.73
   0 -11   2    1.12    1.96
   0 -11  -2    5.67    1.70
   0 -11   2    3.21    2.20
   0 -11  -2    7.60    1.85
   0 -11  -3   22.60    2.62
   0 -11   3   20.76    2.81
   0 -11  -3   23.43    2.45
   0 -11   3   33.79    3.15
   0 -11  -3   34.78    2.99
   0 -11  -4   -1.17    1.87
   0 -11   4    0.79    2.05
   0 -11  -4    1.40    2.16
   0 -11   4   -1.09    1.63
   0 -11  -4    1.19    1.71
   0 -11   5    2.12    1.64
   0 -11  -5    5.26    1.78
   0 -11  -5    3.11    2.24
   0 -11   6    4.10    2.10
   0 -11  -6    0.90    1.67
   0 -11   6    0.69    2.14
   0 -11  -6    3.06    1.80
   0 -11   7    6.54    2.36
   0 -11  -7    6.80    1.92
   0 -11   7    4.44    1.72
   0 -11   8    2.04    1.67
   0 -11  -8    3.38    1.76
   0 -11  -8   -0.53    3.49
   0 -11   9    1.47    2.14
   0 -11  -9   -2.14    2.29
   0 -11  -9   -1.82    3.33
   0 -11  10    8.14    1.91
   0 -11 -10    6.18    2.03
   0 -11 -10   -0.93    3.01
   0 -11  11   -1.65    1.76
   0 -11 -11    4.13    1.94
   0 -11 -11   -1.96    3.19
   0 -11 -12    0.94    1.95
   0 -11 -12    1.75    3.08
   0 -11 -13    0.04    2.45
   0 -11 -13    3.02    3.08
   0 -11 -14   -0.07    2.49
   0 -11 -14   -1.68    2.97
   0 -12   0   12.15    2.44
   0 -12   0   13.70    2.11
   0 -12  -1    6.17    1.86
   0 -12   1    3.23    1.66
   0 -12  -1    5.45    2.34
   0 -12   1    4.19    2.27
   0 -12  -2   -0.39    1.99
   0 -12   2   -0.16    2.09
   0 -12  -2    2.90    2.13
   0 -12   2    0.45    2.30
   0 -12  -3    0.63    2.00
   0 -12   3   -0.96    2.44
   0 -12  -3    0.08    1.67
   0 -12   3   -1.16    2.50
   0 -12  -4    1.18    1.71
   0 -12   4    4.49    2.56
   0 -12  -4    1.09    1.72
   0 -12  -5    0.69    1.75
   0 -12   5    3.16    2.19
   0 -12  -6    3.11    1.87
   0 -12   6    5.16    2.40
   0 -12  -7    1.87    2.46
   0 -12  -8    2.90    2.42
   0 -12  -9    2.35    1.85
   0 -12 -10    0.91    2.34
   0 -12 -11    4.66    2.38
   0 -12 -12    2.97    2.47
   0 -13   0    1.88    2.23
   0 -13   0   -1.47    2.00
   0 -13  -1   -2.95    2.35
   0 -13   1   -0.95    2.62
   0 -13  -1    0.62    2.23
   0 -13   1    0.96    1.82
   0 -13  -2   -0.22    2.33
   0 -13   2    0.44    2.32
   0 -13  -2   -0.68    2.54
   0 -13   2    0.08    1.75
   0 -13   3    2.30    2.23
   0 -13   3    4.68    3.95
   0 -13  -4    6.00    1.96
   0 -13   4    1.09    2.72
   0 -13   4    6.35    2.08
   0 -13   5    0.78    1.82
   0 -13  -6    2.09    1.93
   0 -13   6    2.87    2.52
   0 -13  -7   -0.50    2.26
   0 -13   7    2.69    2.02
   0 -13  -8    2.78    2.63
   0 -13  -9    7.55    2.91
   0 -14  -2    0.17    2.97
   0 -14  -3    0.96    2.52
  -1   0  24    1.18    1.50
  -1   0  24    1.22    2.12
  -1   0  23   -0.61    1.24
  -1   0  23   -1.95    1.93
  -1   0  22   -0.86    1.17
  -1   0  22   -2.36    1.98
  -1   0  21    4.21    1.24
  -1   0  21    3.80    1.91
  -1   0  20   -1.41    1.59
  -1   0  20   -0.30    1.47
  -1   0  19    1.63    1.49
  -1   0  19    0.90    1.49
  -1   0  18    0.95    1.22
  -1   0  18    0.01    1.77
  -1   0  17    6.23    1.33
  -1   0  17    5.69    1.90
  -1   0  16   -1.13    1.32
  -1   0  16    0.48    1.60
  -1   0  15    2.99    1.59
  -1   0  15    6.18    1.31
   1   0 -15    5.31    1.87
  -1   0  14    1.55    2.75
  -1   0  14   -0.88    1.02
  -1   0  14   -2.03    1.75
  -1   0  14   -0.24    1.15
   1   0 -14    1.77    1.77
  -1   0  13   14.13    2.44
  -1   0  13   16.55    1.74
  -1   0  13    9.47    2.25
  -1   0  13   15.62    1.77
   1   0 -13    8.39    2.17
  -1   0  12    2.57    1.81
  -1   0  12    0.21    1.31
  -1   0  12   -2.80    2.57
  -1   0  12   -0.70    1.47
   1   0 -12    0.42    2.03
  -1   0  11   52.82    3.45
  -1   0  11   56.97    3.25
  -1   0  11   58.42    4.74
  -1   0  11   62.72    5.10
  -1   0  10   -0.11    2.20
  -1   0  10    0.33    0.90
  -1   0  10    3.49    2.64
  -1   0  10    0.23    0.99
  -1   0   9  389.43    9.74
  -1   0   8   -1.47    2.16
  -1   0   7   52.04    3.68
   1   0  -7   44.11    3.45
  -1   0   6    1.18    2.19
   1   0  -6    0.71    1.41
  -1   0   5   -0.06    2.21
   1   0  -5    1.27    1.42
  -1   0   4   -0.26    2.07
   1   0  -4   -0.70    1.87
  -1   0   3    1.41    1.84
   1   0  -3    0.21    2.04
  -1   0   2   -0.29    1.72
   1   0  -2    0.66    1.62
  -1   0   1    1.48    2.23
   1   0  -1    2.91    2.20
   1   0   1  755.63   13.68
  -1   0  -1  746.90   14.37
   1   0   2   -0.07    1.75
  -1   0  -2   -0.24    1.65
   1   0   4    0.04    2.09
  -1   0  -4   -0.73    1.94
   1   0   5  345.46    8.26
  -1   0  -5  311.10   11.78
   1   0   6    1.00    2.29
  -1   0  -6   -0.33    1.44
   1   0   7    3.20    1.76
   1   0   8    0.28    1.62
   1   0   9    9.01    1.93
   1   0  10   -0.19    1.64
   1   0  10   -0.76    0.89
   1   0  10    0.57    1.45
   1   0  11   84.34    5.19
   1   0  11  110.42    4.98
   1   0  11  109.54    5.28
  -1   0 -11   97.97    7.22
   1   0  12   -1.44    2.51
   1   0  12    2.16    1.07
   1   0  12    1.27    1.60
  -1   0 -12   -1.03    1.47
   1   0  13   34.18    3.19
   1   0  13   51.63    4.17
   1   0  13   48.03    3.94
   1   0  14    0.44    1.01
   1   0  14   -1.20    1.39
  -1   0 -14    2.40    2.70
   1   0  15   -0.56    1.44
   1   0  15    6.11    2.13
  -1   0 -15    3.12    2.32
   1   0  16   -0.42    1.08
   1   0  16    0.34    1.27
   1   0  17   28.97    2.60
   1   0  17   29.88    3.08
   1   0  18   -1.40    1.08
   1   0  18   -2.18    1.99
   1   0  19   -1.69    1.13
   1   0  19    0.12    1.93
   1   0  20    3.15    1.52
   1   0  20   -0.32    1.90
   1   0  21    2.41    1.25
   1   0  21    4.82    2.05
   1   0  22   -0.32    1.16
   1   0  22    1.55    1.65
   1   0  23   -1.80    1.55
   1   0  23   -1.51    2.13
   1   0  24    1.11    2.76
  -1  -1  24    4.61    1.74
  -1   1  24    4.68    1.50
  -1  -1  24   -0.18    2.30
  -1   1  24    5.11    2.25
  -1  -1  23    0.17    1.20
  -1   1  23   -0.30    1.46
  -1  -1  23   -0.09    2.17
  -1   1  23    0.66    1.99
  -1  -1  22    1.48    1.34
  -1   1  22   -0.40    1.45
  -1  -1  22   -0.56    1.99
  -1   1  22    1.51    1.53
  -1  -1  21    2.66    1.54
  -1   1  21    0.13    1.50
  -1  -1  21   -0.26    1.59
  -1   1  21    0.20    1.42
  -1  -1  20   -0.33    1.19
  -1   1  20   -0.85    1.52
  -1  -1  20    1.61    1.87
  -1   1  20    3.56    2.07
  -1  -1  19    6.76    1.42
  -1   1  19    8.43    1.40
  -1  -1  19   11.58    2.11
  -1   1  19    6.54    1.64
  -1  -1  18   -0.30    1.21
  -1   1  18    2.19    1.20
  -1  -1  18   -0.46    1.96
  -1   1  18   -2.14    1.66
   1  -1 -18    0.57    2.19
  -1  -1  17   30.23    2.25
  -1   1  17   30.61    2.65
  -1  -1  17   21.96    2.98
  -1   1  17   27.88    3.43
   1  -1 -17   20.26    4.14
  -1  -1  16    0.12    1.13
  -1   1  16    0.72    1.18
  -1  -1  16   -0.85    1.26
  -1   1  16   -0.01    1.67
   1  -1 -16   -0.67    2.43
  -1  -1  15   -0.77    1.36
  -1   1  15   -1.15    1.07
  -1  -1  15   -0.73    1.19
  -1   1  15   -0.20    1.17
   1  -1 -15   -1.64    2.30
  -1  -1  14   24.34    3.33
  -1   1  14   23.54    3.29
  -1  -1  14   29.65    2.79
  -1   1  14   23.79    2.30
  -1  -1  14   41.74    4.05
  -1   1  14   28.42    3.28
  -1  -1  14   31.41    2.98
  -1   1  14   22.12    2.28
   1  -1 -14   32.63    4.60
  -1  -1  13    2.90    1.94
  -1   1  13    3.75    2.02
  -1  -1  13    1.46    1.50
  -1   1  13    1.44    1.16
  -1  -1  13    1.44    2.54
  -1   1  13    1.09    1.80
  -1  -1  13    4.32    1.21
  -1   1  13    2.41    1.18
  -1  -1  12    0.92    2.46
  -1   1  12   -0.66    2.32
  -1  -1  12    1.90    1.04
  -1   1  12   -1.32    1.40
  -1  -1  12    0.60    1.80
  -1   1  12   -0.52    2.63
  -1  -1  12    2.89    1.13
  -1   1  12    0.74    1.04
   1  -1 -12    2.64    1.41
  -1  -1  11   38.71    3.58
  -1   1  11   37.54    3.54
  -1  -1  11   43.85    2.57
  -1   1  11   40.99    2.63
  -1   1  11   36.42    4.14
  -1  -1  11   39.59    3.53
  -1  -1  11   39.75    2.77
  -1   1  11   38.80    2.50
  -1  -1  10  167.35    6.85
  -1   1  10  163.39    6.81
  -1  -1  10  166.97    5.84
  -1   1  10  167.16    5.65
  -1  -1  10  160.29    5.49
  -1   1  10  162.72    5.50
  -1  -1   9  127.33    5.67
  -1   1   9  122.76    5.91
  -1  -1   8    3.91    2.17
  -1   1   8    4.09    1.78
  -1  -1   7   10.63    2.50
  -1   1   7   12.57    2.29
   1   1  -7    8.47    1.83
   1  -1  -7    8.83    2.36
  -1  -1   6   18.69    2.65
   1   1  -6   20.92    2.80
  -1   1   6   18.53    2.42
   1  -1  -6   16.83    2.27
  -1  -1   5  716.84   13.11
   1   1  -5  690.41   13.60
   1  -1  -5  717.32   14.28
  -1  -1   4    4.23    1.99
   1   1  -4    2.09    1.93
  -1   1   4    2.24    2.20
   1  -1  -4    2.81    1.53
  -1  -1   3  243.81    9.53
   1   1  -3  230.40    9.37
  -1   1   3  219.79    9.03
   1  -1  -3  228.26    9.45
  -1  -1   2  183.40    6.00
   1   1  -2  168.00    6.94
  -1   1   2  174.24    7.24
   1  -1  -2  179.98    7.35
  -1   1   1  145.33    6.26
  -1  -1   1  134.17    6.93
   1   1  -1  132.53    6.42
   1  -1   0  508.40   12.02
  -1   1   0  527.27   10.91
   1   1   0  501.27   11.14
  -1  -1   0  529.06   11.51
   1  -1   1    6.31    1.95
  -1   1  -1    4.91    2.22
   1   1   1    3.70    1.79
  -1  -1  -1    5.46    1.76
   1  -1   2   15.58    2.55
  -1   1  -2   14.02    2.34
   1   1   2   12.98    2.48
  -1  -1  -2   14.09    2.38
   1  -1   3   36.79    3.26
  -1   1  -3   29.82    2.89
   1   1   3   31.72    3.27
  -1  -1  -3   30.08    3.04
   1  -1   4    1.19    2.22
  -1   1  -4    2.89    1.97
   1   1   4    1.91    1.72
  -1  -1  -4    2.17    2.07
   1  -1   5   23.74    2.52
  -1   1  -5   21.25    2.42
   1   1   5   18.07    2.91
  -1  -1  -5   17.01    2.65
   1  -1   6  353.38    8.60
   1   1   6  338.78   12.59
  -1   1  -6  301.90   11.93
   1  -1   7  144.01    6.30
   1   1   7  160.54    6.88
   1  -1   8  106.13    4.73
   1   1   8   93.31    5.69
   1  -1   9  253.38   10.21
   1   1   9  259.54   10.38
   1  -1   9  264.12    9.01
   1  -1   9  239.58    8.67
   1  -1  10   19.90    2.44
   1   1  10   20.29    2.99
   1  -1  10   21.73    1.74
   1   1  10   18.68    1.75
   1  -1  10   24.14    2.98
   1   1  10   26.81    2.06
  -1  -1 -10   18.48    2.11
   1  -1  11   23.84    3.43
   1   1  11   24.34    3.04
   1  -1  11   25.72    2.44
   1   1  11   22.86    2.13
   1  -1  11   27.49    2.70
   1   1  11   26.69    2.64
  -1  -1 -11   24.89    3.09
   1  -1  12    1.00    1.90
   1   1  12   -2.12    1.90
   1  -1  12   -1.18    0.93
   1   1  12    0.62    1.00
   1  -1  12    0.55    1.07
   1   1  12    1.03    1.25
  -1   1 -12    0.61    1.53
  -1  -1 -12    0.97    1.51
   1  -1  13    0.67    2.12
   1   1  13    2.28    2.11
   1  -1  13    2.04    1.01
   1   1  13    2.42    1.10
   1  -1  13    1.82    1.25
   1   1  13    2.62    1.20
  -1  -1 -13    2.85    1.84
   1  -1  14    9.76    1.33
   1   1  14    9.25    1.32
   1  -1  14    9.18    1.52
   1   1  14   10.08    1.50
  -1  -1 -14    7.64    2.04
   1  -1  15   13.69    1.74
   1   1  15   13.60    1.93
   1  -1  15   17.31    2.69
   1   1  15    8.55    1.85
  -1  -1 -15   13.05    3.02
   1  -1  16   12.00    1.98
   1   1  16   11.47    1.90
   1  -1  16   14.24    2.04
   1   1  16   11.75    2.45
  -1  -1 -16    5.05    2.01
   1  -1  17    5.60    1.27
   1   1  17    7.56    1.71
   1  -1  17    6.22    1.84
   1   1  17    4.63    1.84
  -1  -1 -17    2.21    1.98
   1  -1  18   -0.79    1.52
   1   1  18   -3.11    1.13
   1  -1  18    1.38    1.43
   1   1  18    1.46    1.38
   1  -1  19    3.44    1.61
   1   1  19    4.50    1.23
   1  -1  19    3.38    1.88
   1   1  19    4.54    1.56
   1  -1  20    4.18    1.65
   1   1  20    0.14    1.19
   1  -1  20   -0.59    1.48
   1   1  20   -0.40    2.03
   1  -1  21    2.95    1.22
   1   1  21    1.09    1.60
   1  -1  21   -0.02    2.04
   1   1  21    3.31    1.60
   1  -1  22   -1.10    1.41
   1   1  22    3.39    1.32
   1  -1  22    0.46    1.77
   1   1  22    3.42    1.72
   1  -1  23    1.26    1.48
   1   1  23   -0.35    1.69
   1  -1  23   -1.50    2.22
   1   1  23    4.14    2.29
   1  -1  24   -0.56    1.60
   1  -1  24    2.30    2.39
  -1  -2  24   -0.38    1.35
  -1   2  24   -0.64    1.70
  -1  -2  23   -0.65    1.55
  -1   2  23    0.86    1.51
  -1  -2  23    1.99    1.83
  -1   2  23   -1.43    1.98
  -1  -2  22    3.89    1.59
  -1   2  22    5.60    1.71
  -1  -2  22    2.70    1.73
  -1   2  22    4.32    1.88
  -1  -2  21   19.09    2.02
  -1   2  21   18.31    2.03
  -1  -2  21   15.90    2.40
  -1   2  21   15.46    2.28
  -1  -2  20    2.96    1.35
  -1   2  20    5.62    1.81
  -1  -2  20    6.08    1.73
  -1   2  20    3.04    1.76
   1  -2 -20    0.32    2.13
  -1  -2  19    8.28    1.67
  -1   2  19   10.52    1.74
  -1  -2  19    5.33    1.59
  -1   2  19    9.82    1.61
   1  -2 -19    4.91    2.29
  -1  -2  18   52.93    4.00
  -1   2  18   58.80    4.43
  -1  -2  18   54.81    4.32
  -1   2  18   54.71    4.46
  -1  -2  17    4.20    1.67
  -1   2  17    9.16    2.03
  -1  -2  17    2.57    1.91
  -1   2  17    8.36    1.80
   1  -2 -17    4.50    2.01
  -1  -2  16    9.94    1.39
  -1   2  16    6.96    1.29
  -1  -2  16   10.92    1.60
  -1   2  16    9.70    1.48
   1  -2 -16    6.16    1.88
  -1  -2  15    1.88    1.07
  -1   2  15    2.20    1.55
  -1  -2  15    2.34    1.76
  -1   2  15    2.84    1.21
   1  -2 -15    3.92    1.68
  -1  -2  14    0.01    2.99
  -1   2  14    1.96    2.34
  -1  -2  14    1.67    1.29
  -1   2  14    4.73    1.21
  -1  -2  14    2.74    1.21
  -1   2  14    3.00    1.60
   1  -2 -14    2.81    2.06
  -1  -2  13   31.61    3.47
  -1   2  13   29.60    4.12
  -1  -2  13   35.64    1.97
  -1   2  13   38.23    2.55
  -1  -2  13   35.44    3.16
  -1   2  13   32.43    3.64
   1  -2 -13   24.00    2.66
  -1  -2  13   37.22    2.32
  -1   2  13   32.67    3.99
   1  -2 -13   38.54    3.76
  -1  -2  12  281.07   12.85
  -1   2  12  261.64   11.51
  -1  -2  12  294.17   11.13
  -1   2  12  302.51   11.55
  -1  -2  12  278.27   12.89
  -1   2  12  272.89   12.10
  -1   2  12  284.92   10.97
   1  -2 -12  282.71   12.36
  -1  -2  11   21.19    2.55
  -1   2  11   20.27    2.57
  -1  -2  11   22.65    1.77
  -1   2  11   19.04    1.65
  -1  -2  11   21.59    3.08
  -1   2  11   18.07    2.82
  -1  -2  11   22.75    1.96
  -1   2  11   20.46    1.94
   1  -2 -11   22.13    2.36
  -1  -2  10   52.54    3.33
  -1   2  10   52.63    3.48
  -1  -2  10   50.60    2.69
  -1   2  10   51.60    2.51
  -1  -2  10   32.77    4.66
  -1   2  10   53.65    4.22
  -1  -2  10   55.27    3.43
  -1   2  10   51.20    2.91
   1  -2 -10   53.71    3.78
  -1  -2   9   26.57    2.57
  -1   2   9   32.81    2.93
  -1  -2   8   34.11    2.79
  -1   2   8   35.10    3.34
  -1  -2   7   46.26    3.14
   1   2  -7   48.68    3.42
  -1   2   7   55.85    3.83
  -1  -2   6  602.01   11.72
   1   2  -6  596.00   12.64
   1  -2  -6  561.20   13.02
   1   2  -5 1597.51   23.48
  -1   2   5 1617.80   22.85
  -1  -2   4  624.14   12.19
   1   2  -4  630.05   12.55
  -1   2   4  659.18   12.89
   1  -2  -4  598.21   12.99
  -1  -2   3  847.75   14.63
   1   2  -3  877.39   15.35
  -1   2   3  921.13   15.90
   1  -2  -3  881.54   16.05
  -1   2   2   27.25    2.61
  -1  -2   2   29.99    2.82
   1   2  -2   28.76    2.58
  -1   2   2   31.54    3.28
   1  -2  -1  235.87    9.74
  -1  -2   1  255.37    9.97
  -1   2   1  271.32   10.56
   1   2  -1  262.80   10.23
   1   2   0   -0.20    2.00
   1  -2   0    0.56    2.15
  -1   2   0    1.20    1.80
   1   2   0    0.39    1.70
   1  -2   1  297.90   11.30
  -1   2  -1  289.47   10.97
   1   2   1  288.89   11.21
  -1  -2  -1  274.87   10.90
   1  -2   2  233.99    9.19
  -1   2  -2  221.35    9.08
   1   2   2  222.31    9.09
  -1  -2  -2  228.56    9.59
   1  -2   3   77.52    5.16
  -1   2  -3   74.27    4.78
   1   2   3   71.71    4.79
  -1  -2  -3   70.19    4.96
   1  -2   4  366.87    8.96
  -1   2  -4  336.85   12.39
   1   2   4  360.64    9.04
  -1  -2  -4  353.05    9.32
   1  -2   5  113.76    5.28
  -1   2  -5   93.11    5.64
   1   2   5  103.77    6.30
  -1  -2  -5   91.17    5.81
   1  -2   6   38.68    3.32
  -1   2  -6   31.58    3.02
   1   2   6   40.12    3.13
   1  -2   7    0.07    1.46
   1   2   7    0.38    1.59
   1  -2   8   15.30    2.15
   1   2   8   12.60    2.55
   1  -2   9   90.40    5.38
   1   2   9   88.52    5.40
   1   2   9   86.60    4.49
   1  -2   9   99.72    6.06
  -1  -2  -9   96.05    5.70
   1  -2  10   -1.62    2.27
   1   2  10   -0.18    1.64
   1  -2  10    1.08    1.31
   1   2  10    1.02    1.23
  -1  -2 -10    0.80    1.31
   1  -2  10    1.87    1.59
   1   2  10    0.34    1.04
  -1  -2 -10    0.44    2.11
   1  -2  11   61.91    4.58
   1   2  11   61.52    4.90
   1  -2  11   70.64    3.81
   1   2  11   70.99    3.65
  -1  -2 -11   63.13    4.68
   1  -2  11   56.37    3.73
   1  -2  11   65.83    3.69
   1   2  11   69.56    3.90
  -1  -2 -11   76.84    5.93
   1  -2  12    7.62    3.02
   1   2  12    5.84    2.70
   1  -2  12    6.39    1.47
   1   2  12    8.30    1.60
  -1  -2 -12    5.43    1.58
   1  -2  12    7.34    1.43
   1   2  12    5.59    1.30
  -1  -2 -12    5.50    2.34
   1  -2  13    5.75    2.28
   1   2  13    2.45    2.19
   1  -2  13    7.91    1.35
   1   2  13    6.89    1.24
   1  -2  13    3.38    1.78
   1   2  13    5.61    1.31
  -1  -2 -13    5.40    2.73
   1  -2  14    9.26    1.61
   1   2  14   11.18    1.47
   1  -2  14   11.32    2.03
   1   2  14    7.62    1.86
  -1  -2 -14   13.28    2.31
   1  -2  15    3.52    1.16
   1   2  15    4.79    1.43
   1  -2  15    0.77    1.35
   1   2  15    4.75    1.39
  -1  -2 -15    1.85    1.98
   1  -2  16    9.41    1.48
   1   2  16    8.53    1.75
   1  -2  16    8.22    2.07
   1   2  16    6.63    1.47
   1  -2  17   14.80    2.05
   1   2  17   19.99    2.08
   1  -2  17   18.76    4.17
   1   2  17   16.58    2.33
  -1  -2 -17   22.77    4.09
   1  -2  18    4.64    1.57
   1   2  18    6.11    1.69
   1  -2  18    5.52    2.02
   1   2  18    5.07    1.89
  -1  -2 -18    4.38    2.97
   1  -2  19   11.63    1.83
   1   2  19   14.99    1.90
   1  -2  19   11.25    2.02
   1   2  19   10.64    2.23
   1  -2  20    6.66    1.44
   1   2  20    7.98    1.50
   1  -2  20    8.27    1.86
   1   2  20    4.79    1.64
   1  -2  21    1.31    1.44
   1   2  21    0.39    1.30
   1  -2  21    1.39    2.36
   1  -2  22    1.45    1.23
   1   2  22    0.99    1.52
   1  -2  22   -0.20    1.88
   1  -2  23   -0.46    1.43
   1   2  23    0.50    1.44
   1  -2  23    0.33    2.05
   1   2  23   -1.28    2.61
  -1  -3  24    3.11    1.65
  -1   3  24    0.57    1.48
  -1  -3  23    0.65    1.69
  -1   3  23    2.35    1.57
  -1  -3  23    2.45    2.13
  -1   3  23    1.54    2.58
  -1  -3  22   -0.94    1.23
  -1   3  22   -1.75    1.68
  -1  -3  22   -0.34    1.81
  -1  -3  21    0.16    1.45
  -1   3  21    1.31    1.25
  -1  -3  21    1.05    2.16
  -1   3  21    0.07    1.44
  -1  -3  20   -1.55    1.17
  -1   3  20   -2.22    1.36
  -1  -3  20   -2.30    1.94
  -1   3  20    0.13    1.40
   1  -3 -20   -0.59    2.98
  -1  -3  19    0.17    1.17
  -1   3  19   -1.46    1.20
  -1  -3  19   -1.55    2.09
  -1   3  19    0.81    1.35
   1  -3 -19    1.18    2.65
  -1  -3  18    0.23    1.07
  -1   3  18    2.04    1.18
  -1  -3  18    0.80    1.77
  -1   3  18    3.84    1.86
   1  -3 -18   -1.90    2.48
  -1  -3  17    3.08    1.19
  -1   3  17   -0.98    1.26
  -1  -3  17   -2.89    1.38
  -1   3  17   -0.39    1.29
   1  -3 -17   -2.32    2.02
  -1  -3  16   23.68    2.69
  -1   3  16   19.83    2.60
  -1  -3  16   22.44    2.75
  -1   3  16   24.36    3.03
   1  -3 -16   20.90    3.50
  -1  -3  15    4.23    1.17
  -1   3  15    1.62    1.50
  -1  -3  15    1.42    1.27
  -1   3  15    2.41    1.57
   1  -3 -15    2.63    2.38
  -1  -3  14   45.96    4.96
  -1  -3  14   59.21    4.64
  -1   3  14   52.89    4.30
   1  -3 -14   46.03    9.04
  -1  -3  14   59.60    4.80
  -1   3  14   54.93    4.45
   1  -3 -14   53.68    5.31
  -1  -3  13   36.82    4.10
  -1   3  13   36.99    4.12
  -1  -3  13   41.15    3.48
  -1   3  13   44.49    3.67
  -1   3  13   46.57    4.43
   1  -3 -13   29.57    3.36
  -1  -3  13   46.19    3.81
  -1   3  13   48.99    4.07
   1  -3 -13   45.80    4.87
  -1  -3  12   14.01    2.28
  -1   3  12   15.37    3.32
  -1  -3  12   15.43    1.61
  -1   3  12   14.12    1.52
  -1   3  12   19.67    2.88
   1  -3 -12   15.27    2.15
  -1  -3  12   17.31    2.11
  -1   3  12   16.17    1.75
   1  -3 -12   18.85    2.23
  -1  -3  11  121.33    6.58
  -1   3  11  118.53    6.84
  -1  -3  11  131.68    5.57
  -1   3  11  126.50    5.68
  -1  -3  11  149.62    7.52
  -1   3  11  119.00    6.60
   1  -3 -11  105.03    6.05
  -1  -3  11  136.77    5.94
  -1   3  11  125.49    5.81
  -1  -3  10   38.83    3.50
  -1   3  10   41.48    3.47
  -1  -3  10   46.01    2.55
  -1   3  10   44.47    2.65
  -1  -3  10   44.19    3.77
  -1   3  10   35.40    3.39
   1  -3 -10   37.31    3.34
  -1  -3  10   43.67    2.62
  -1   3  10   39.75    2.53
   1  -3 -10   48.88    3.19
   1  -3 -10   50.22    3.21
  -1  -3   9    2.96    2.01
  -1   3   9    0.02    1.68
  -1  -3   9    2.45    0.87
  -1   3   9    0.39    1.41
   1  -3  -9    1.47    1.19
   1  -3  -9    1.58    1.25
  -1  -3   8   63.86    4.52
  -1   3   8   64.19    4.51
  -1  -3   7    8.48    1.77
   1   3  -7    7.54    2.30
  -1   3   7   13.16    2.19
  -1  -3   6  261.64   10.05
   1   3  -6  225.40    9.76
  -1   3   6  270.71   10.45
  -1   3   5  458.71   10.12
  -1  -3   4  347.12    8.05
   1   3  -4  310.77   11.58
  -1   3   4  333.22   12.34
  -1   3   3    4.15    2.24
  -1  -3   3    4.09    1.91
   1   3  -3    3.80    1.75
  -1   3   3    3.57    1.71
  -1   3   2   29.59    2.72
  -1  -3   2   30.05    2.94
   1   3  -2   27.87    2.58
  -1   3   2   29.04    3.25
  -1  -3   1 1650.34   23.42
  -1   3   1 1729.57   24.22
   1   3  -1 1660.51   22.93
  -1   3   1 1745.80   24.33
   1  -3   0  153.95    6.54
   1   3   0  154.90    6.53
  -1   3   0  149.53    6.23
   1   3   0  159.79    6.63
   1   3   1   48.86    3.26
   1  -3   1   50.78    3.38
  -1   3  -1   48.61    3.39
   1   3   1   53.97    3.68
   1  -3   2  283.27   10.84
  -1   3  -2  258.01   10.13
   1   3   2  284.10   10.89
  -1  -3  -2  266.95   10.71
   1   3   3  961.35   16.18
  -1  -3  -3  929.79   17.82
   1  -3   4    1.84    1.53
  -1   3  -4    2.02    1.38
   1   3   4    2.28    1.61
  -1  -3  -4    2.69    2.22
   1  -3   5   67.31    4.47
  -1   3  -5   50.20    3.23
   1   3   5   66.83    4.84
   1  -3   6   44.59    3.07
   1   3   6   45.28    3.59
   1  -3   7  162.24    6.78
   1   3   7  172.91    7.05
   1  -3   8    0.15    1.49
   1   3   8    1.50    1.57
   1  -3   8    1.11    0.93
  -1  -3  -8    4.16    2.03
  -1  -3  -8    3.33    1.27
   1  -3   9   20.27    2.37
   1   3   9   18.55    2.39
   1  -3   9   19.00    1.64
   1   3   9   22.28    1.89
  -1  -3  -9   20.31    2.03
   1  -3   9   17.02    3.19
   1   3   9   18.56    1.93
   1  -3  10   59.11    4.37
   1   3  10   70.18    4.80
   1  -3  10   67.77    3.41
   1   3  10   62.47    3.35
  -1  -3 -10   57.83    3.94
   1  -3  10   74.00    3.94
   1   3  10   63.03    3.58
  -1  -3 -10   73.88    4.74
   1  -3  11   20.85    2.77
   1   3  11   25.31    3.01
   1  -3  11   28.87    2.37
   1   3  11   23.67    2.08
  -1  -3 -11   22.47    3.11
   1  -3  11   25.60    2.63
   1   3  11   28.58    2.38
  -1  -3 -11   27.87    3.24
   1  -3  12   -1.19    2.73
   1   3  12   -0.39    2.63
   1  -3  12   -0.72    0.91
   1   3  12    0.63    1.02
  -1  -3 -12    1.43    1.44
   1  -3  12    1.22    1.77
   1   3  12    2.05    1.47
  -1  -3 -12    1.56    1.64
   1  -3  13    8.41    3.45
   1  -3  13    7.47    1.23
   1   3  13    5.15    1.45
  -1  -3 -13    5.65    1.71
   1  -3  13    5.99    1.71
   1   3  13    5.32    1.69
  -1  -3 -13    5.06    1.81
   1  -3  14   21.17    2.13
   1   3  14   16.81    1.92
   1  -3  14   23.31    2.50
   1   3  14   22.25    2.37
  -1  -3 -14   23.38    3.20
   1  -3  15    7.86    1.87
   1   3  15   11.43    1.43
   1  -3  15   12.92    1.73
   1   3  15    8.87    1.48
  -1  -3 -15    8.39    2.75
   1  -3  16   11.29    1.71
   1   3  16   12.92    2.52
   1  -3  16   11.64    2.02
   1   3  16   10.64    1.87
  -1  -3 -16   11.24    2.81
   1  -3  17   19.08    2.35
   1   3  17   24.24    2.84
   1  -3  17   28.52    2.85
   1   3  17   22.06    2.93
  -1  -3 -17    9.53    3.94
   1  -3  18   18.17    2.09
   1   3  18   20.56    2.30
   1  -3  18   20.84    2.82
   1   3  18   18.95    2.56
  -1  -3 -18   10.76    4.29
   1  -3  19    2.89    1.66
   1   3  19    4.91    1.75
   1  -3  19    2.08    1.76
   1   3  19    2.91    1.52
  -1  -3 -19    2.22    2.88
   1  -3  20   13.84    1.95
   1   3  20   10.18    1.43
   1  -3  20    9.04    2.38
   1   3  20   10.58    1.88
   1  -3  21    2.53    1.52
   1   3  21    3.68    1.59
   1  -3  21    0.50    1.87
   1   3  21    1.02    1.77
   1  -3  22   -0.49    1.21
   1   3  22    0.94    1.63
   1  -3  22   -2.05    2.56
   1  -3  23   -0.22    1.44
   1  -3  23   -0.84    2.24
  -1  -4  23   16.64    1.98
  -1  -4  23    1.03    3.28
  -1  -4  22    1.00    1.27
  -1   4  22    4.17    1.63
  -1  -4  22    0.51    2.54
  -1   4  22    3.36    1.89
  -1  -4  21   -0.67    1.46
  -1   4  21   -0.08    1.39
  -1  -4  21    2.16    2.21
  -1   4  21    1.68    1.76
   1  -4 -21    0.94    2.76
  -1  -4  20   10.71    1.70
  -1   4  20    7.57    1.52
  -1  -4  20    6.88    2.29
  -1   4  20    8.01    1.95
  -1  -4  19    8.76    1.97
  -1   4  19    9.16    1.50
  -1  -4  19   11.48    2.10
  -1   4  19   13.10    2.58
   1  -4 -19    6.80    2.87
  -1  -4  18    1.97    1.52
  -1   4  18    3.38    1.53
  -1  -4  18    6.27    1.62
   1  -4 -18    0.53    2.62
  -1  -4  17   61.22    4.64
  -1   4  17   66.35    4.95
  -1  -4  17   70.02    5.27
  -1   4  17   57.59    4.65
   1  -4 -17   55.91    7.02
  -1  -4  16   -0.68    1.11
  -1   4  16   -1.03    1.46
  -1  -4  16    0.69    1.37
  -1   4  16    3.15    1.59
   1  -4 -16    0.52    1.85
  -1  -4  15   14.66    1.76
  -1   4  15   14.97    2.06
   1  -4 -15   11.30    2.56
  -1  -4  15   13.80    1.74
  -1   4  15   11.49    1.60
   1  -4 -15    9.62    2.48
  -1  -4  14    5.20    1.50
  -1   4  14    1.15    1.47
   1  -4 -14    3.12    1.53
  -1  -4  14    2.88    1.54
  -1   4  14    4.37    1.61
   1  -4 -14    3.53    1.77
  -1  -4  13   19.76    3.78
  -1  -4  13   26.76    2.61
  -1   4  13   20.73    2.31
   1  -4 -13   17.42    2.65
  -1  -4  13   21.44    2.15
  -1   4  13   21.89    2.09
   1  -4 -13   16.34    2.70
  -1  -4  12   50.55    4.78
  -1   4  12   52.31    5.49
  -1  -4  12   62.88    4.72
  -1   4  12   59.92    4.69
   1  -4 -12   51.56    4.75
  -1  -4  12   62.64    4.88
  -1   4  12   56.91    4.65
   1  -4 -12   67.60    5.53
  -1  -4  11   17.97    3.05
  -1   4  11   15.80    2.52
  -1  -4  11   16.36    1.58
  -1   4  11   18.12    1.88
  -1   4  11   15.82    2.31
   1  -4 -11   16.50    2.08
  -1  -4  11   19.45    1.96
  -1   4  11   13.08    1.62
   1  -4 -11   20.28    3.14
   1  -4 -11   22.35    2.23
  -1  -4  10   19.85    2.64
  -1   4  10   24.34    3.03
  -1  -4  10   22.62    2.16
  -1   4  10   19.84    2.00
  -1   4  10   18.37    2.85
   1  -4 -10   20.05    2.66
  -1  -4  10   23.65    2.45
  -1   4  10   19.48    1.94
   1  -4 -10   22.04    2.52
   1  -4 -10   23.84    2.42
  -1  -4   9   77.78    5.04
  -1   4   9   64.78    4.69
  -1  -4   9   74.06    3.85
  -1   4   9   68.14    3.70
   1  -4  -9   74.87    4.39
  -1  -4   9   64.43    3.85
  -1   4   9   59.15    3.68
   1  -4  -9   74.20    4.24
   1  -4  -9   71.14    4.32
  -1  -4   8   27.94    2.72
  -1   4   8   27.42    3.10
   1  -4  -8   26.42    2.17
  -1  -4   8   24.12    1.75
   1  -4  -8   26.21    2.46
   1  -4  -8   28.84    2.37
   1  -4  -8   28.52    2.23
  -1  -4   7  437.71   10.29
  -1   4   7  387.13    9.52
   1  -4  -7  429.54    8.78
  -1  -4   6   64.72    4.39
   1   4  -6   52.44    3.67
  -1   4   6   59.73    3.81
  -1  -4   5  106.89    4.69
   1   4  -5   96.02    5.74
  -1   4   5  109.43    5.47
  -1  -4   4  169.95    6.90
   1   4  -4  135.02    5.89
  -1   4   4  150.34    6.32
  -1  -4   3    1.79    1.43
   1   4  -3    0.00    1.25
  -1   4   3    0.64    1.52
  -1  -4   2  296.89   11.56
  -1   4   2  287.25   11.22
   1   4  -2  296.91   11.32
  -1   4   2  327.42   12.16
  -1   4   1  236.01    9.69
  -1   4   1  269.03   10.54
   1   4  -1  252.74   10.11
   1  -4   0   -1.11    2.23
   1   4   0   -0.06    1.73
  -1   4   0   -0.01    1.77
   1   4   0    0.30    1.35
   1  -4   1   32.62    2.87
   1   4   1   32.07    3.15
  -1   4  -1   26.95    2.76
   1   4   1   34.12    3.10
   1   4   2    0.22    1.43
   1  -4   2   -0.24    1.50
  -1   4  -2    0.79    1.31
   1   4   2   -0.40    2.06
   1   4   3    1.80    1.97
   1  -4   3    1.05    1.49
  -1   4  -3   -0.77    1.79
   1   4   3    1.03    2.06
   1  -4   4  176.02    6.89
   1   4   4  173.71    7.12
   1  -4   5    7.43    1.77
   1   4   5    7.84    1.86
   1  -4   6    9.39    1.89
   1   4   6    7.57    2.27
   1  -4   7  114.39    5.65
   1   4   7  128.12    6.31
   1  -4   7  126.06    4.89
  -1  -4  -7  124.73    6.17
  -1  -4  -7  138.49    6.56
   1  -4   8   -0.62    2.17
   1   4   8   -1.35    2.21
   1  -4   8    1.62    1.16
   1   4   8   -0.09    1.19
  -1  -4  -8    0.87    1.18
   1  -4   8    0.61    1.04
  -1  -4  -8    1.56    1.39
  -1  -4  -8    0.73    1.22
   1  -4   9   -0.24    1.60
   1   4   9    2.02    2.31
   1  -4   9    2.11    0.93
   1   4   9    1.74    1.44
  -1  -4  -9    1.99    1.30
   1  -4   9    1.87    0.93
   1  -4   9    2.48    1.18
   1   4   9    1.08    0.98
  -1  -4  -9    0.26    1.81
  -1  -4  -9    3.72    1.36
   1  -4  10   -0.13    1.73
   1   4  10    1.38    1.68
   1  -4  10    1.19    1.26
   1   4  10    2.82    1.08
  -1  -4 -10    2.28    1.76
   1  -4  10    0.90    1.06
   1  -4  10    1.66    1.18
   1   4  10    0.55    1.04
  -1  -4 -10    1.87    1.56
   1  -4  11    3.57    1.97
   1   4  11    1.73    1.88
   1  -4  11    1.46    1.32
   1   4  11    0.34    1.45
  -1  -4 -11    2.49    2.08
   1  -4  11    1.33    1.13
   1   4  11    7.06    1.56
  -1  -4 -11    3.08    1.65
   1  -4  12   14.00    2.75
   1   4  12   14.01    3.32
   1  -4  12   20.11    2.04
   1   4  12   16.05    2.10
  -1  -4 -12   15.72    2.12
   1  -4  12   18.91    2.11
   1   4  12   15.41    2.11
  -1  -4 -12   11.26    2.50
   1  -4  13   17.75    1.91
   1   4  13   12.96    1.99
  -1  -4 -13   15.50    2.32
   1  -4  13   17.86    2.17
   1   4  13   18.04    2.29
  -1  -4 -13   13.61    3.36
   1  -4  14    0.49    1.04
   1   4  14    0.76    1.43
  -1  -4 -14    1.53    2.10
   1  -4  14    0.09    1.29
   1   4  14   -0.11    1.12
  -1  -4 -14   -1.79    2.60
   1  -4  15    5.50    1.22
   1   4  15    5.68    1.29
   1  -4  15    5.55    2.11
   1   4  15    2.38    1.55
  -1  -4 -15    7.12    2.12
   1  -4  16   45.54    3.69
   1   4  16   43.35    3.50
   1  -4  16   47.21    4.13
   1   4  16   38.12    5.73
   1  -4  17    1.50    1.16
   1   4  17    2.79    1.20
   1  -4  17    2.89    2.33
   1   4  17    2.43    1.69
  -1  -4 -17    7.72    2.29
   1  -4  18    7.44    1.34
   1   4  18    8.11    1.38
   1  -4  18    2.71    1.62
   1   4  18    5.41    2.13
   1  -4  19   -2.03    1.47
   1  -4  19   -4.15    2.10
   1   4  19    3.06    1.51
   1  -4  20    4.17    1.32
   1   4  20    4.68    1.53
   1  -4  20    2.17    2.34
   1  -4  21    2.77    1.31
   1  -4  21    1.37    2.15
   1  -4  22    9.47    1.85
   1   4  22    7.38    1.65
   1  -4  22    4.77    2.27
   1  -4  23    0.33    1.48
  -1  -5  23   -0.39    1.79
  -1  -5  22   12.37    1.91
  -1   5  22    8.21    1.82
  -1  -5  22   -1.17    2.85
  -1  -5  21   -0.33    1.51
  -1   5  21    0.03    1.24
  -1  -5  21    2.71    2.60
   1  -5 -21    3.80    2.84
  -1  -5  20    4.85    1.77
  -1   5  20    6.94    1.59
  -1  -5  20    0.80    1.94
  -1   5  20    9.44    2.51
   1  -5 -20   -0.42    2.65
  -1  -5  19    2.16    1.23
  -1  -5  19    2.95    2.08
  -1   5  19    3.90    1.52
   1  -5 -19   -3.91    2.73
  -1  -5  18   12.38    1.55
  -1   5  18   10.58    1.95
  -1  -5  18    9.20    3.09
  -1   5  18   13.77    1.98
   1  -5 -18    8.51    2.35
  -1  -5  17    2.63    1.63
  -1   5  17    0.33    1.21
  -1  -5  17    1.44    1.94
  -1   5  17   -1.77    1.27
   1  -5 -17   -0.46    2.49
  -1  -5  16   23.84    2.77
  -1   5  16   21.92    2.67
   1  -5 -16   17.47    2.97
  -1  -5  16   22.16    3.06
  -1   5  16   21.03    2.88
   1  -5 -16   12.30    2.93
  -1  -5  15   41.39    2.72
  -1   5  15   40.69    2.95
   1  -5 -15   30.19    3.78
  -1  -5  15   27.54    3.21
  -1   5  15   34.08    2.73
  -1  -5  14    5.61    1.16
  -1   5  14    6.51    1.82
   1  -5 -14    7.52    1.75
  -1  -5  14    8.09    1.52
  -1   5  14    7.98    1.66
   1  -5 -14    7.35    2.00
  -1  -5  13   36.42    2.42
  -1   5  13   41.84    2.85
   1  -5 -13   36.77    3.14
  -1  -5  13   36.51    3.40
  -1   5  13   34.00    3.02
   1  -5 -13   38.58    4.84
  -1  -5  12    0.40    0.96
  -1   5  12    0.64    1.06
   1  -5 -12    0.89    1.75
  -1  -5  12    1.12    1.12
  -1   5  12    0.91    1.05
   1  -5 -12    3.70    1.46
  -1  -5  11   10.58    2.95
  -1  -5  11   11.73    1.47
  -1   5  11    9.71    1.38
   1  -5 -11   14.95    2.48
  -1  -5  11   12.98    1.74
  -1   5  11    9.01    1.61
   1  -5 -11   11.05    1.94
   1  -5 -11    9.58    1.61
  -1  -5  10    6.07    2.73
  -1   5  10    5.36    2.00
  -1  -5  10    7.02    1.12
  -1   5  10    4.52    1.58
   1  -5 -10    5.02    1.72
  -1  -5  10    3.17    1.16
  -1   5  10    3.59    1.35
   1  -5 -10    6.93    1.51
   1  -5 -10    7.98    1.96
  -1  -5   9   17.20    2.83
  -1   5   9   12.57    2.21
  -1  -5   9   16.17    1.37
   1  -5  -9   15.03    1.96
  -1  -5   9   12.30    3.44
  -1   5   9   11.37    1.75
   1  -5  -9   15.31    1.73
   1  -5  -9   16.35    1.73
  -1  -5   8   42.68    4.17
  -1   5   8   39.79    4.13
   1  -5  -8   35.94    3.02
  -1  -5   8   39.44    2.98
   1  -5  -8   42.09    3.43
   1  -5  -8   40.94    3.37
   1  -5  -8   40.85    3.40
  -1  -5   7  221.08    9.06
  -1   5   7  218.92    9.13
   1  -5  -7  223.68    8.34
  -1  -5   7  218.25    7.81
   1  -5  -7  237.48    8.85
   1  -5  -7  251.27    9.03
   1  -5  -7  223.18    8.31
  -1  -5   6   24.14    2.84
  -1   5   6   23.93    2.95
   1  -5  -6   26.09    2.29
  -1  -5   6   22.22    1.84
   1  -5  -6   25.94    2.19
   1  -5  -6   21.56    1.86
   1  -5  -6   13.96    2.38
   1  -5  -6   25.46    2.18
  -1  -5   5   57.80    3.73
  -1   5   5   57.64    3.52
   1  -5  -5   55.01    3.13
  -1  -5   4  152.78    6.68
   1   5  -4  117.99    5.61
  -1   5   4  140.70    6.17
  -1  -5   3   17.33    2.21
   1   5  -3   16.36    2.48
  -1   5   3   16.35    2.25
   1   5  -2    7.79    2.03
  -1   5   2   12.66    2.09
   1   5  -2    9.90    2.26
   1   5  -1    1.98    1.96
  -1   5   1    2.54    1.59
   1   5  -1    2.38    1.47
   1   5   0   19.89    2.29
   1   5   0   20.81    2.70
  -1   5   0   24.41    2.65
   1  -5   1    2.69    2.24
   1   5   1    6.20    2.11
   1  -5   2   30.43    2.83
   1  -5   3   40.00    3.10
   1   5   3   34.31    3.08
   1  -5   4    7.87    1.87
   1   5   4    9.63    1.84
  -1  -5  -4    8.12    1.33
  -1  -5  -4    8.41    1.55
   1  -5   5    7.01    1.83
   1   5   5    7.03    1.85
   1  -5   5    4.63    0.98
  -1  -5  -5    6.43    1.36
  -1  -5  -5    7.91    1.48
  -1  -5  -5    5.28    1.50
   1  -5   6   14.86    2.59
   1   5   6   14.17    2.20
  -1  -5  -6   14.77    1.85
   1  -5   6   16.72    1.41
  -1  -5  -6   15.97    1.93
  -1  -5  -6   17.69    1.87
  -1  -5  -6   15.37    1.94
   1  -5   7    2.54    1.66
   1   5   7    2.51    1.63
   1  -5   7    2.34    0.96
  -1  -5  -7    3.95    1.32
   1  -5   7    2.54    0.88
   1  -5   7    0.71    1.20
  -1  -5  -7    3.53    1.43
  -1  -5  -7    0.41    1.26
  -1  -5  -7    2.81    1.31
   1  -5   8    1.74    1.75
   1   5   8    1.71    2.47
   1  -5   8    1.18    0.92
   1   5   8    1.92    1.31
  -1  -5  -8    2.17    1.79
   1  -5   8   -0.01    0.82
  -1  -5  -8    0.49    1.85
  -1  -5  -8   -0.03    1.20
   1  -5   9    2.24    1.74
   1   5   9    3.24    2.33
   1  -5   9    1.96    0.94
   1   5   9    3.83    1.41
  -1  -5  -9    0.77    1.34
   1  -5   9   -0.19    1.19
   1  -5   9   -0.03    1.15
  -1  -5  -9    2.23    1.96
  -1  -5  -9    2.09    1.31
   1  -5  10    9.79    2.30
   1   5  10    9.69    2.42
   1  -5  10    9.63    1.21
   1   5  10    7.84    1.55
  -1  -5 -10    7.77    2.05
   1  -5  10    5.38    1.74
   1  -5  10    7.38    1.53
  -1  -5 -10    8.35    2.03
   1  -5  11    3.85    2.45
   1   5  11    2.72    2.18
   1  -5  11    4.21    1.36
   1   5  11    3.76    1.16
  -1  -5 -11    3.62    1.48
   1  -5  11    3.82    1.34
   1   5  11    2.62    1.31
  -1  -5 -11    3.10    1.79
   1  -5  12    6.11    1.25
   1   5  12    3.82    1.16
  -1  -5 -12    3.73    2.33
   1  -5  12    6.11    1.45
   1   5  12    3.98    1.59
  -1  -5 -12    9.72    2.76
   1  -5  13  133.43    5.63
   1   5  13  148.40    6.32
  -1  -5 -13  121.03    6.54
   1   5  13  128.75    7.12
  -1  -5 -13  119.52   10.31
   1  -5  14    3.04    1.14
   1   5  14    3.01    1.53
  -1  -5 -14    2.65    1.81
   1  -5  14    2.97    1.95
   1   5  14    1.14    1.64
  -1  -5 -14   -1.82    2.59
   1  -5  15   11.04    1.73
   1   5  15   15.51    2.52
  -1  -5 -15    9.88    2.08
   1  -5  15    8.62    3.16
   1   5  15   11.03    1.97
  -1  -5 -15   12.34    3.28
   1  -5  16    5.62    1.33
   1   5  16    3.14    1.63
   1  -5  16   -1.00    1.50
   1   5  16    5.80    1.50
  -1  -5 -16   -1.45    2.72
   1  -5  17    1.25    1.44
   1   5  17    0.84    1.47
   1  -5  17    4.58    1.80
   1   5  17    0.25    1.74
  -1  -5 -17    3.11    2.12
   1  -5  18   13.66    1.96
   1  -5  18    8.42    2.65
  -1  -5 -18    6.15    2.48
   1  -5  19    4.17    1.68
   1   5  19    4.36    1.84
   1  -5  19    2.04    2.36
  -1  -5 -19    0.32    2.22
   1  -5  20    6.92    1.43
   1   5  20    8.45    1.99
   1  -5  20    3.40    2.53
   1  -5  21   -1.09    1.50
   1   5  21    1.20    1.46
   1  -5  21   -0.32    2.56
   1  -5  22    0.44    1.32
   1  -5  22   -0.83    3.20
  -1  -6  22   -0.42    1.73
  -1  -6  21    6.13    1.72
  -1   6  21    6.01    1.73
   1  -6 -21   -0.61    2.80
  -1  -6  20   -0.76    1.53
  -1   6  20    1.48    1.50
  -1  -6  20    0.16    2.46
   1  -6 -20   -1.46    2.76
  -1  -6  19   -2.70    1.48
  -1   6  19   -1.22    1.42
  -1  -6  19   -0.79    1.89
   1  -6 -19   -2.76    2.23
  -1  -6  18    6.28    1.83
  -1   6  18    4.31    1.30
  -1  -6  18   -1.04    2.47
   1  -6 -18   -0.38    2.73
  -1  -6  17    0.98    1.23
  -1   6  17    4.32    1.84
  -1  -6  17    1.17    2.62
   1  -6 -17    1.63    2.06
  -1  -6  16    1.14    1.45
  -1   6  16   -2.00    1.22
   1  -6 -16    0.67    2.09
  -1  -6  16    0.92    2.03
  -1   6  16    0.13    1.80
   1  -6 -16    1.78    2.81
  -1  -6  15    5.09    1.36
  -1   6  15    5.11    1.31
   1  -6 -15    3.47    1.80
  -1  -6  15   -0.12    1.95
  -1   6  15    2.54    1.99
   1  -6 -15    6.26    2.11
  -1  -6  14   22.30    2.16
  -1   6  14   27.90    2.79
   1  -6 -14   23.07    2.77
  -1   6  14   19.51    2.40
   1  -6 -14   23.14    3.47
  -1  -6  13    1.69    1.12
   1  -6 -13   -3.32    1.88
  -1  -6  13   -2.33    1.68
  -1   6  13   -0.28    1.45
   1  -6 -13    1.74    1.79
  -1  -6  12   36.44    2.42
  -1   6  12   41.02    2.96
   1  -6 -12   34.36    7.58
  -1  -6  12   24.34    4.81
   1  -6 -12   36.98    4.90
   1  -6 -12   47.34    3.24
  -1  -6  11    0.73    1.06
  -1   6  11   -0.01    1.07
   1  -6 -11    0.54    1.36
  -1  -6  11   -0.21    1.32
   1  -6 -11   -1.43    1.45
  -1   6  10   10.62    2.41
  -1  -6  10   12.93    1.56
  -1   6  10   11.31    1.43
   1  -6 -10   12.32    1.77
   1  -6 -10   17.67    2.15
   1  -6 -10   15.06    1.98
  -1  -6   9   22.36    3.16
  -1   6   9   21.58    3.47
   1  -6  -9   20.99    2.30
  -1  -6   9   25.36    2.29
   1  -6  -9   19.06    2.19
   1  -6  -9   20.12    2.31
   1  -6  -9   26.68    2.63
  -1  -6   8   15.85    3.12
  -1   6   8   17.23    2.56
   1  -6  -8   16.09    1.91
  -1  -6   8   16.17    1.61
   1  -6  -8   16.00    2.23
  -1  -6   8   15.60    1.82
   1  -6  -8   22.80    2.52
   1  -6  -8   21.40    2.22
   1  -6  -8   13.82    1.67
  -1  -6   7    0.28    1.60
  -1   6   7    1.74    2.20
   1  -6  -7    0.35    2.21
  -1  -6   7    0.36    0.82
   1  -6  -7    2.48    1.16
  -1  -6   7    0.85    1.01
   1  -6  -7    3.71    1.31
   1  -6  -7    0.02    1.29
   1  -6  -7    1.04    1.56
  -1  -6   6    3.08    1.72
  -1   6   6    3.08    1.68
   1  -6  -6    4.23    1.18
  -1  -6   6    2.90    0.90
   1  -6  -6    3.62    1.55
  -1  -6   6    1.93    1.09
   1  -6  -6    3.16    1.58
   1  -6  -6    3.61    1.75
   1  -6  -6    2.44    1.17
  -1  -6   5    5.53    1.75
  -1   6   5    9.97    2.00
   1  -6  -5   10.88    1.46
  -1  -6   5    9.20    1.14
   1  -6  -5   11.16    1.46
  -1  -6   5    9.14    1.49
   1  -6  -5   12.69    1.47
   1  -6  -5   11.90    2.17
   1  -6  -5   11.92    1.90
  -1  -6   4   19.95    2.39
  -1   6   4   21.67    2.71
   1  -6  -4   25.15    2.05
  -1  -6   4   25.95    2.01
   1  -6  -4   24.19    1.96
  -1  -6   4   25.39    1.91
   1  -6  -4   24.64    2.54
   1  -6  -4   22.79    2.14
  -1   6   3  108.70    4.91
   1   6  -3  115.46    6.07
   1  -6  -3  114.12    5.00
   1  -6  -3  116.63    4.84
  -1  -6   3  114.16    4.91
   1  -6  -3  112.79    5.30
   1   6  -2    7.61    2.29
   1  -6  -2    7.59    1.40
   1  -6  -2    5.26    1.13
  -1  -6   2    4.87    1.45
   1   6  -1   73.03    5.00
  -1   6   1   73.52    5.05
   1  -6  -1   78.29    4.21
  -1  -6   1   80.12    4.17
   1  -6  -1   69.57    3.77
   1   6   0    0.07    2.13
  -1   6   0    1.91    1.81
   1  -6   0    1.43    1.33
  -1  -6   0    1.03    1.01
   1  -6   0    0.67    0.88
   1   6   1   61.40    4.31
  -1   6  -1   62.06    4.68
   1  -6   1   52.30    2.46
  -1  -6  -1   65.59    3.68
   1  -6   1   60.54    3.38
   1  -6   2   33.06    3.03
   1   6   2   34.45    3.38
   1  -6   2   34.13    2.29
  -1  -6  -2   38.68    3.01
   1  -6   2   34.49    2.14
   1  -6   3   63.98    4.58
   1   6   3   61.62    4.28
   1  -6   3   59.52    3.35
  -1  -6  -3   74.21    4.49
   1  -6   3   62.57    3.56
  -1  -6  -3   67.95    4.52
   1  -6   4   53.52    4.39
   1   6   4   56.52    4.31
  -1  -6  -4   58.97    3.50
   1  -6   4   63.82    3.41
  -1  -6  -4   65.76    4.07
   1  -6   4   59.06    3.32
  -1  -6  -4   72.89    4.52
  -1  -6  -4   69.30    4.01
  -1  -6  -4   67.18    4.10
   1  -6   5   85.37    5.40
   1   6   5   76.08    4.80
  -1  -6  -5   69.57    3.77
   1  -6   5   79.47    3.90
  -1  -6  -5   88.65    4.87
   1  -6   5   84.05    4.11
  -1  -6  -5   81.52    4.74
  -1  -6  -5   84.64    4.47
  -1  -6  -5   87.89    4.88
   1  -6   6   46.51    4.28
   1   6   6   40.42    4.24
   1  -6   6   41.60    3.11
  -1  -6  -6   38.24    3.27
   1  -6   6   46.08    3.47
  -1  -6  -6   54.88    3.97
  -1  -6  -6   53.97    3.38
  -1  -6  -6   52.05    3.30
   1  -6   7   24.07    2.96
   1   6   7   22.04    2.80
  -1  -6  -7   24.68    2.23
   1  -6   7   28.91    2.39
  -1  -6  -7   23.47    2.25
   1  -6   7   28.98    2.33
   1  -6   7   17.20    2.84
  -1  -6  -7   30.80    3.04
  -1  -6  -7   31.02    2.65
  -1  -6  -7   30.41    3.07
   1  -6   8   28.47    3.96
   1   6   8   26.92    3.30
   1  -6   8   40.55    3.41
   1   6   8   31.96    2.78
  -1  -6  -8   35.03    3.24
   1  -6   8   36.00    3.12
   1  -6   8   22.56    2.92
  -1  -6  -8   36.18    3.92
  -1  -6  -8   41.76    4.11
   1  -6   9    3.72    3.18
   1   6   9    9.03    2.77
   1  -6   9    9.57    1.32
   1   6   9   10.62    1.39
  -1  -6  -9   11.07    2.10
   1  -6   9    9.26    1.28
   1  -6   9    4.13    1.84
  -1  -6  -9   11.17    2.25
  -1  -6  -9   12.55    2.31
   1  -6  10    7.74    2.82
   1  -6  10   12.17    1.53
   1   6  10    9.92    1.36
  -1  -6 -10    5.96    1.97
   1  -6  10    8.14    1.33
   1  -6  10    4.61    1.53
  -1  -6 -10    8.75    2.57
   1  -6  11    2.55    1.07
   1   6  11    2.82    1.42
  -1  -6 -11    0.16    1.48
   1  -6  11    1.98    1.94
  -1  -6 -11    0.64    1.73
   1  -6  12    4.54    1.18
   1   6  12    6.20    1.28
  -1  -6 -12    1.25    2.23
   1  -6  12   -1.85    1.52
  -1  -6 -12    3.14    2.69
   1  -6  13   30.83    2.29
   1   6  13   27.10    3.24
  -1  -6 -13   29.15    3.58
   1  -6  13   16.50    4.50
   1   6  14   89.53    5.85
  -1  -6 -14   91.57    6.52
  -1  -6 -14   72.63    6.78
   1  -6  15   37.47    2.66
   1   6  15   32.50    2.48
  -1  -6 -15   37.72    3.60
  -1  -6 -15   20.93    3.62
   1  -6  16    6.87    1.41
   1   6  16    5.34    1.28
   1  -6  16    6.48    2.75
  -1  -6 -16    4.29    2.38
   1  -6  17    0.71    1.92
   1   6  17    1.28    1.62
   1  -6  17   -1.47    2.19
  -1  -6 -17    1.52    2.77
   1  -6  18   -0.09    1.54
   1   6  18   -0.96    1.53
   1  -6  18   -1.26    2.94
  -1  -6 -18   -3.67    2.85
   1  -6  19    1.54    1.68
   1   6  19   -0.21    1.70
   1  -6  19   -4.07    2.64
  -1  -6 -19    1.92    2.81
   1  -6  20    1.84    1.31
   1  -6  20    1.26    2.58
   1  -6  21    2.45    1.90
  -1  -7  21    1.33    1.68
  -1  -7  20   -0.18    1.54
  -1   7  20    1.21    2.56
   1  -7 -20   -1.02    2.38
  -1  -7  19    1.77    1.56
  -1   7  19    3.60    1.54
   1  -7 -19    2.37    2.88
  -1  -7  18    5.97    1.61
  -1   7  18    6.81    1.66
   1  -7 -18    5.97    2.79
  -1  -7  17    0.11    1.45
   1  -7 -17    3.31    2.74
  -1  -7  16   -1.19    1.88
  -1   7  16    3.28    1.67
   1  -7 -16    0.45    3.28
   1  -7 -16   -0.57    1.96
  -1  -7  15    0.66    1.14
  -1   7  15   -0.11    1.42
   1  -7 -15   -0.61    1.70
  -1  -7  14    0.92    1.30
  -1   7  14    5.42    1.62
   1  -7 -14    1.24    1.68
   1  -7 -14   -0.41    1.86
  -1  -7  13    0.51    1.35
  -1   7  13    2.07    1.29
   1  -7 -13    1.57    1.68
   1  -7 -13    1.84    1.97
  -1  -7  12    6.27    1.39
  -1   7  12    6.40    1.63
   1  -7 -12    4.34    1.66
   1  -7 -12    8.87    1.97
  -1  -7  11   11.76    1.61
  -1   7  11    9.14    1.43
   1  -7 -11    4.46    2.24
   1  -7 -11    6.03    1.78
   1  -7 -11    9.75    1.70
  -1  -7  10    2.56    1.42
  -1   7  10    0.75    1.18
   1  -7 -10    1.08    1.40
   1  -7 -10    5.17    2.08
   1  -7 -10    2.17    1.38
   1  -7  -9   49.22    3.31
  -1  -7   9   50.06    2.99
   1  -7  -9   50.21    4.14
   1  -7  -9   50.47    3.80
   1  -7  -9   54.38    3.91
  -1   7   8    2.17    2.08
   1  -7  -8    0.76    1.16
  -1  -7   8   -0.97    1.01
   1  -7  -8    0.44    1.24
  -1  -7   8    0.92    0.93
   1  -7  -8    1.97    1.38
   1  -7  -8    0.82    1.40
   1  -7  -8    2.09    1.76
  -1   7   7   39.21    4.39
   1  -7  -7   44.77    3.78
  -1  -7   7   46.82    3.78
   1  -7  -7   40.46    3.54
  -1  -7   7   48.60    4.06
   1  -7  -7   62.33    5.33
   1  -7  -7   50.38    4.42
   1  -7  -7   47.46    4.10
  -1   7   6   65.84    5.92
   1  -7  -6   79.44    6.05
  -1  -7   6   75.15    5.53
   1  -7  -6   69.71    5.36
  -1  -7   6   74.41    5.77
   1  -7  -6   74.00    6.03
   1  -7  -6   84.74    7.17
   1  -7  -6   84.48    6.45
  -1   7   5    1.20    1.80
   1   7  -5   -0.09    1.99
   1  -7  -5    0.44    1.34
  -1  -7   5    1.21    1.25
   1  -7  -5    0.76    1.15
  -1  -7   5    0.28    0.96
   1  -7  -5   -1.60    1.54
   1  -7  -5    3.97    2.08
   1  -7  -5    1.11    1.18
  -1   7   4    1.92    1.84
   1   7  -4    1.57    1.67
   1  -7  -4    1.47    1.17
  -1  -7   4    0.69    1.17
   1  -7  -4    2.83    1.20
  -1  -7   4    2.52    2.08
   1  -7  -4    0.89    1.45
   1  -7  -4    3.23    1.69
  -1   7   3   73.28    4.48
   1   7  -3   66.03    4.53
   1  -7  -3   73.58    3.51
  -1  -7   3   71.66    3.47
   1  -7  -3   92.76    3.96
  -1  -7   3   83.36    3.57
   1  -7  -3   83.14    4.01
   1  -7  -3   80.77    4.04
  -1   7   2    2.88    2.66
   1   7  -2   -0.25    2.55
   1  -7  -2   -1.84    1.41
  -1  -7   2    3.42    1.34
   1  -7  -2    1.53    1.49
  -1  -7   2    0.34    1.10
   1  -7  -2   -1.20    1.22
   1  -7  -2   -0.79    0.88
   1   7  -1   -1.78    2.13
   1  -7  -1    0.55    0.99
  -1  -7   1   -0.40    0.90
  -1  -7   1    0.94    1.04
   1  -7  -1    0.07    1.00
   1  -7  -1   -0.35    0.97
   1   7   0   89.58    5.57
  -1   7   0   86.57    5.26
  -1  -7   0   94.11    4.61
   1  -7   0   93.78    4.71
  -1  -7   0  103.02    5.07
   1  -7   0   98.79    4.58
   1  -7   0   79.17    4.35
   1   7   1    4.28    1.89
  -1   7  -1    2.58    1.82
  -1  -7  -1    3.54    1.12
   1  -7   1    4.41    1.43
  -1  -7  -1    3.19    1.18
   1  -7   1    3.33    1.38
   1   7   2    5.69    2.69
  -1   7  -2    7.67    2.48
  -1  -7  -2    4.87    1.48
   1  -7   2    6.03    1.11
  -1  -7  -2    4.96    1.27
   1  -7   2    6.69    1.38
  -1  -7  -2    4.95    1.49
  -1  -7  -2    5.20    1.59
   1   7   3   11.87    2.11
  -1  -7  -3   11.79    1.90
   1  -7   3   15.73    1.84
  -1  -7  -3   13.37    1.96
   1  -7   3   14.81    1.57
  -1  -7  -3   16.80    2.35
  -1  -7  -3   14.46    1.71
   1  -7   4    2.38    2.57
   1   7   4    0.13    2.36
   1  -7   4    0.75    1.34
  -1  -7  -4    0.39    1.22
   1  -7   4    1.13    1.02
  -1  -7  -4    1.17    1.85
  -1  -7  -4    0.74    1.31
  -1  -7  -4    0.61    1.74
   1  -7   5    0.80    2.04
   1   7   5    1.15    2.56
  -1  -7  -5    2.48    1.12
   1  -7   5    2.00    0.98
  -1  -7  -5    2.65    1.62
   1  -7   5    3.22    0.96
  -1  -7  -5    3.31    2.27
  -1  -7  -5    5.33    1.93
  -1  -7  -5    2.56    1.34
   1  -7   6   16.48    3.35
   1   7   6   12.00    3.42
  -1  -7  -6   15.52    2.22
   1  -7   6   16.89    1.78
  -1  -7  -6   13.50    2.12
   1  -7   6   16.73    1.76
  -1  -7  -6   18.52    2.50
  -1  -7  -6   17.50    2.15
  -1  -7  -6   18.07    2.13
   1  -7   7   25.45    3.65
   1   7   7   24.25    3.71
  -1  -7  -7   32.44    3.12
   1  -7   7   28.25    2.73
  -1  -7  -7   35.64    3.32
   1  -7   7   33.90    2.98
  -1  -7  -7   29.69    4.52
  -1  -7  -7   40.69    3.90
  -1  -7  -7   43.07    4.04
   1  -7   8   20.30    2.11
   1   7   8   19.24    1.95
  -1  -7  -8   19.97    2.21
   1  -7   8   22.19    2.20
  -1  -7  -8   20.36    3.43
  -1  -7  -8   19.95    2.48
   1  -7   9    0.83    0.99
   1   7   9    2.94    1.06
  -1  -7  -9   -0.24    1.39
   1  -7   9    2.51    1.36
  -1  -7  -9    1.60    3.98
   1  -7  10    8.51    1.28
   1   7  10    8.52    1.58
  -1  -7 -10    8.07    1.77
   1  -7  10   11.87    1.33
  -1  -7 -10    8.33    2.81
   1  -7  11   10.69    1.51
   1   7  11    7.98    1.67
  -1  -7 -11   14.12    2.49
   1  -7  11    3.12    1.91
  -1  -7 -11    9.14    2.19
   1  -7  12   22.34    2.32
   1   7  12   18.12    1.66
  -1  -7 -12   13.89    2.79
   1  -7  12    8.80    3.27
  -1  -7 -12   13.50    3.44
   1  -7  13    0.44    1.54
   1   7  13    0.55    1.38
  -1  -7 -13   -2.27    1.68
   1  -7  13    0.53    1.97
  -1  -7 -13   -0.63    2.11
   1  -7  14   33.06    2.46
   1   7  14   30.71    2.55
  -1  -7 -14   29.12    3.52
  -1  -7 -14   17.58    5.37
   1  -7  15   -2.42    1.58
   1   7  15    0.56    1.45
  -1  -7 -15   -1.19    2.35
   1  -7  15    0.81    1.85
  -1  -7 -15   -4.83    2.86
   1  -7  16    2.49    1.68
   1   7  16    0.95    1.23
  -1  -7 -16   -1.30    2.80
   1  -7  17    7.71    1.44
   1   7  17    5.22    1.57
   1  -7  17    1.62    3.94
  -1  -7 -17    0.74    2.28
  -1  -7 -18   -1.27    2.78
   1  -7  19    0.81    1.30
  -1  -7 -19   -0.29    2.83
   1  -7  20    2.11    1.72
   1  -8 -20    2.16    2.76
  -1  -8  19   -1.99    1.70
  -1  -8  18   -0.47    1.35
  -1   8  18   -1.33    1.65
   1  -8 -18    0.62    2.29
  -1  -8  17    4.10    1.62
  -1   8  17    5.74    1.70
   1  -8 -17    1.24    2.37
  -1  -8  16   -0.82    1.18
  -1   8  16   -0.61    1.23
   1  -8 -16    2.20    2.53
   1  -8 -16   -2.65    2.76
  -1  -8  15    0.99    1.15
  -1   8  15    0.76    1.31
   1  -8 -15   -1.62    1.79
   1  -8 -15    8.18    3.00
  -1  -8  14    2.90    1.17
  -1   8  14    0.46    1.70
   1  -8 -14    0.56    2.82
  -1  -8  13    5.22    1.21
  -1   8  13    2.99    1.34
   1  -8 -13    5.70    1.75
   1  -8 -13    5.12    2.59
  -1  -8  12    0.11    1.01
  -1   8  12    0.78    1.56
   1  -8 -12    1.23    2.16
   1  -8 -12    1.79    2.01
  -1   8  11   -0.07    1.48
   1  -8 -11   -2.02    1.51
   1  -8 -11    1.27    2.43
  -1  -8  10    2.06    1.11
  -1   8  10    0.47    1.14
   1  -8 -10    0.06    1.48
   1  -8 -10    2.57    1.73
   1  -8 -10    1.42    1.97
  -1  -8   9    3.60    1.29
   1  -8  -9    1.46    1.53
   1  -8  -9    5.83    1.75
   1  -8  -9    2.34    2.21
   1  -8  -8    3.55    2.13
  -1  -8   8    1.42    1.23
   1  -8  -8    3.13    1.46
  -1  -8   8    4.18    1.56
   1  -8  -8    1.07    1.55
   1  -8  -8    2.41    1.97
   1  -8  -8    5.58    2.12
   1  -8  -7    3.43    1.60
  -1  -8   7    2.83    1.03
   1  -8  -7    3.92    1.40
  -1  -8   7    2.57    1.34
   1  -8  -7    0.45    1.41
   1  -8  -7    0.57    1.50
   1  -8  -7    3.77    1.81
   1  -8  -6   16.30    2.00
  -1  -8   6   15.53    1.77
   1  -8  -6   17.93    2.19
  -1  -8   6   19.98    2.20
   1  -8  -6   15.13    2.06
   1  -8  -6   14.42    2.06
   1  -8  -6   21.00    2.36
  -1   8   5    3.58    2.87
   1  -8  -5    5.93    1.36
  -1  -8   5    6.95    1.52
   1  -8  -5    7.38    1.84
  -1  -8   5    5.11    1.20
   1  -8  -5    5.70    1.73
   1  -8  -5   10.19    2.16
   1  -8  -5    4.92    1.44
  -1   8   4    2.71    2.16
   1  -8  -4    2.67    1.75
  -1  -8   4    1.41    0.96
   1  -8  -4    1.53    1.23
  -1  -8   4    2.98    1.50
   1  -8  -4    5.18    1.88
  -1   8   3    1.18    2.08
   1  -8  -3    2.56    2.87
  -1  -8   3    1.86    1.38
   1  -8  -3    2.39    1.25
  -1  -8   3    2.54    1.16
   1  -8  -3    3.85    1.77
   1  -8  -3    4.00    1.59
  -1   8   2    8.00    2.29
   1  -8  -2    9.84    1.93
  -1  -8   2   11.43    1.56
   1  -8  -2   11.02    1.93
  -1  -8   2   12.79    1.71
   1  -8  -2   11.47    1.65
  -1   8   1   13.54    2.67
   1  -8  -1   18.53    2.38
  -1  -8   1   11.82    1.60
  -1  -8   1   13.67    1.77
   1  -8  -1   14.63    2.02
   1  -8  -1   10.25    1.82
   1   8   0    2.37    2.70
  -1   8   0    2.31    2.12
  -1  -8   0    3.92    1.46
   1  -8   0    2.09    1.09
  -1  -8   0    1.82    1.61
   1  -8   0    1.81    1.58
   1   8   1   -0.23    2.59
  -1   8  -1   -1.34    2.21
  -1  -8  -1    1.88    2.04
   1  -8   1    3.86    1.54
  -1  -8  -1   -0.07    1.21
   1  -8   1   -0.51    1.46
   1   8   2    2.14    3.01
  -1   8  -2    3.23    2.14
  -1  -8  -2    3.50    1.19
   1  -8   2    1.65    1.01
  -1  -8  -2    1.66    1.20
   1  -8   2    2.95    1.12
   1   8   3    2.03    3.00
  -1   8  -3   -2.33    3.03
  -1  -8  -3   -0.44    1.46
   1  -8   3    0.42    0.99
  -1  -8  -3   -1.35    1.31
   1  -8   3    1.39    1.05
  -1  -8  -3    1.31    1.59
  -1  -8  -3    1.26    2.08
  -1  -8  -3    2.37    1.68
   1   8   4    0.21    3.15
  -1   8  -4   -1.57    2.42
  -1  -8  -4    0.63    1.26
   1  -8   4    0.96    1.41
  -1  -8  -4    0.11    1.42
   1  -8   4    3.58    1.53
  -1  -8  -4    0.09    1.90
  -1  -8  -4    0.25    1.39
  -1  -8  -4   -0.86    1.69
   1   8   5    5.78    2.71
  -1  -8  -5    7.99    1.56
   1  -8   5    6.53    1.86
  -1  -8  -5    6.55    2.28
   1  -8   5   10.08    1.71
  -1  -8  -5    7.56    1.94
  -1  -8  -5    9.77    1.74
  -1  -8  -5    7.51    1.81
  -1  -8  -6    2.52    1.80
   1  -8   6    1.32    0.97
  -1  -8  -6    2.65    2.31
   1  -8   6    2.05    1.37
  -1  -8  -6    0.17    1.56
  -1  -8  -6   -0.32    1.39
  -1  -8  -6    1.56    1.33
   1  -8   7   30.45    2.82
  -1  -8  -7   25.07    2.98
   1  -8   7   31.90    2.90
  -1  -8  -7   27.18    4.83
  -1  -8  -7   34.08    2.85
  -1  -8  -7   40.30    3.43
   1  -8   8    0.70    1.60
   1   8   8   -0.22    1.01
  -1  -8  -8    0.65    1.48
   1  -8   8   -0.80    2.18
  -1  -8  -8   -1.64    1.74
   1  -8   9   19.68    2.32
   1   8   9   20.36    2.47
  -1  -8  -9   20.92    2.80
   1  -8   9   22.61    2.73
  -1  -8  -9   14.05    3.95
   1  -8  10    0.57    1.08
   1   8  10    3.19    1.65
  -1  -8 -10   -1.29    2.05
   1  -8  10    1.37    1.39
  -1  -8 -10   -2.36    2.29
   1  -8  11    3.14    1.19
   1   8  11    0.35    1.56
  -1  -8 -11    0.31    2.05
  -1  -8 -11    0.01    2.08
   1  -8  12   11.65    1.78
   1   8  12   10.75    1.67
  -1  -8 -12    9.48    1.95
  -1  -8 -12    4.39    2.32
   1  -8  13    1.99    1.61
  -1  -8 -13    3.34    1.82
  -1  -8 -13   -1.82    2.92
   1  -8  14    4.11    1.53
   1   8  14    2.97    1.56
  -1  -8 -14   -1.17    1.87
  -1  -8 -14   -1.14    2.27
   1   8  15   -1.10    1.48
  -1  -8 -15    0.75    2.26
  -1  -8 -15    0.89    2.29
   1  -8  16    0.33    1.57
   1   8  16    0.95    1.74
  -1  -8 -16   -3.23    2.83
   1  -8  17    1.02    1.28
  -1  -8 -17    3.25    2.91
   1  -8  18    0.12    1.49
  -1  -8 -18   -4.02    3.03
   1  -8  19    2.45    1.93
   1  -9 -19   -0.84    2.92
  -1  -9  18    5.45    2.29
   1  -9 -18   -0.26    2.45
  -1  -9  17    0.13    1.72
  -1   9  17    0.52    2.06
   1  -9 -17   -4.47    2.61
  -1  -9  16    4.99    1.70
  -1   9  16    4.59    2.01
   1  -9 -16   -0.35    3.28
  -1  -9  15    0.55    1.63
  -1   9  15   -0.93    1.42
   1  -9 -15   -0.33    2.30
   1  -9 -15   -2.13    2.83
  -1  -9  14    4.36    1.46
  -1   9  14    1.84    1.51
   1  -9 -14    2.76    2.28
   1  -9 -14    1.87    2.74
  -1  -9  13   -0.23    1.52
  -1   9  13    3.41    3.27
   1  -9 -13   -0.13    2.35
   1  -9 -13    1.96    2.66
  -1  -9  12   28.01    2.39
  -1   9  12   28.56    2.67
   1  -9 -12   29.51    2.93
  -1  -9  11    9.09    1.57
  -1   9  11    8.39    1.52
   1  -9 -11    9.21    1.85
   1  -9 -11    4.37    2.22
  -1  -9  10    0.80    1.07
  -1   9  10   -0.47    1.53
   1  -9 -10    3.50    2.07
   1  -9 -10    1.34    2.59
  -1  -9   9    4.07    1.48
  -1   9   9    3.47    1.80
   1  -9  -9    7.04    1.71
   1  -9  -9    2.54    2.69
   1  -9  -9    7.05    1.68
   1  -9  -8    2.55    1.40
  -1  -9   8    0.76    1.14
   1  -9  -8    0.19    1.55
  -1  -9   8    1.06    1.49
   1  -9  -8    2.27    1.81
   1  -9  -8    2.53    2.09
   1  -9  -8   -0.05    2.16
   1  -9  -7    2.61    1.78
  -1  -9   7    2.49    1.80
   1  -9  -7    2.44    2.07
  -1  -9   7    1.36    1.25
   1  -9  -7    1.20    1.63
   1  -9  -7   10.45    2.43
   1  -9  -7    2.87    1.45
   1  -9  -6    3.98    1.33
  -1  -9   6    3.34    1.42
   1  -9  -6    3.15    1.52
  -1  -9   6    6.72    1.81
   1  -9  -6    1.49    1.80
   1  -9  -6    2.32    2.44
   1  -9  -6    4.91    1.99
   1  -9  -5    0.76    1.22
   1  -9  -5   -1.04    1.35
  -1  -9   5   -1.29    1.16
   1  -9  -5    1.20    1.56
   1  -9  -5    0.50    2.05
   1  -9  -5   -0.14    1.31
   1  -9  -4    5.23    1.82
  -1  -9   4    4.00    1.19
   1  -9  -4    2.23    1.41
  -1  -9   4    4.21    1.52
   1  -9  -4    5.94    1.70
   1  -9  -4    8.24    2.40
   1  -9  -4    4.69    1.64
   1  -9  -3    2.75    1.35
  -1  -9   3    2.84    1.55
   1  -9  -3    4.84    1.60
  -1  -9   3    0.34    2.06
   1  -9  -3    4.36    1.85
   1  -9  -2   -1.57    1.22
  -1  -9   2   -0.83    1.31
  -1  -9   2    1.42    1.24
   1  -9  -2    1.70    1.33
   1  -9  -2    1.92    1.97
   1  -9  -1   10.10    1.75
  -1  -9   1    6.56    1.45
  -1  -9   1    8.13    1.59
   1  -9   0   -1.14    1.90
  -1  -9   0    1.28    1.25
   1  -9   0    2.70    1.25
  -1  -9  -1   27.90    2.73
   1  -9   1   29.05    2.67
  -1  -9  -1   26.08    2.04
   1  -9   1   31.43    2.40
  -1  -9  -2   -1.33    1.56
   1  -9   2    0.71    1.53
  -1  -9  -2   -1.23    1.66
   1  -9   2   -0.53    1.13
  -1  -9  -2    0.78    1.57
  -1  -9  -3   46.84    3.15
   1  -9   3   47.25    2.89
  -1  -9  -3   56.52    3.49
   1  -9   3   51.23    3.35
  -1  -9  -4    2.89    1.60
   1  -9   4    4.69    1.64
  -1  -9  -4    4.80    1.60
   1  -9   4    6.33    1.36
  -1  -9  -4    4.61    2.11
  -1  -9  -4    2.89    2.16
  -1  -9  -4    5.64    1.93
  -1  -9  -5    9.40    1.86
   1  -9   5   11.05    1.59
  -1  -9  -5   10.54    1.89
   1  -9   5   11.11    1.76
  -1  -9  -5    6.80    2.88
  -1  -9  -5    4.92    1.83
  -1  -9  -5   10.15    2.98
  -1  -9  -6   33.67    5.82
   1  -9   6   31.76    2.58
  -1  -9  -6   31.14    2.67
   1  -9   6   42.00    3.12
  -1  -9  -6   28.88    5.10
  -1  -9  -6   30.56    2.98
   1  -9   7    3.92    1.35
   1   9   7    2.63    1.17
  -1  -9  -7    0.74    2.25
   1  -9   7    4.37    1.46
  -1  -9  -7    2.18    1.94
  -1  -9  -7    4.06    1.69
   1  -9   8    6.69    1.62
   1   9   8    3.79    1.40
  -1  -9  -8    3.78    1.71
   1  -9   8    4.69    1.56
  -1  -9  -8    4.21    2.65
   1  -9   9    0.98    1.13
   1   9   9    1.05    1.60
  -1  -9  -9   -0.60    2.31
   1  -9   9    0.40    1.37
  -1  -9  -9    1.46    2.01
   1  -9  10   16.65    2.11
   1   9  10   14.93    2.45
  -1  -9 -10   16.33    2.53
  -1  -9 -10    5.83    3.46
   1  -9  11    0.16    1.14
  -1  -9 -11    3.58    1.71
  -1  -9 -11    5.62    2.80
   1  -9  12    0.93    1.43
   1   9  12    0.30    1.60
  -1  -9 -12   -0.38    1.69
  -1  -9 -12    1.05    2.43
  -1  -9 -13    0.67    2.51
  -1  -9 -13    0.10    2.84
   1  -9  14    3.76    1.43
  -1  -9 -14    1.43    1.96
  -1  -9 -14   -1.75    2.47
   1  -9  15    3.13    1.52
  -1  -9 -15    0.60    2.21
  -1  -9 -15   -2.06    2.89
   1  -9  16   -0.07    1.45
  -1  -9 -16    1.77    2.40
   1  -9  17    7.34    1.94
  -1  -9 -17   -0.42    3.40
   1  -9  18    0.65    2.14
   1 -10 -17   -1.45    3.01
   1 -10 -16   -3.02    2.86
  -1 -10  15    1.90    2.11
   1 -10 -15    1.13    3.61
   1 -10 -15    1.37    3.17
  -1 -10  14   -0.39    1.59
  -1  10  14    0.39    1.99
   1 -10 -14    0.73    2.36
   1 -10 -14    1.54    2.87
  -1 -10  13    8.09    1.79
  -1  10  13    7.06    1.88
   1 -10 -13    8.71    2.05
   1 -10 -13    4.15    3.35
  -1  10  12    0.22    1.90
   1 -10 -12    2.55    2.41
   1 -10 -12    1.78    2.56
  -1 -10  11   -0.89    1.29
  -1  10  11    1.01    1.79
   1 -10 -11    2.40    2.18
   1 -10 -11   -0.80    2.01
  -1 -10  10    4.38    1.59
  -1  10  10    3.63    1.42
   1 -10 -10    3.44    2.58
   1 -10 -10    1.22    2.22
  -1 -10   9   10.50    1.79
  -1  10   9   12.58    2.05
   1 -10  -9    8.99    2.27
   1 -10  -9    3.68    3.32
  -1 -10   8   28.08    2.36
  -1  10   8   22.81    2.76
   1 -10  -8   26.62    2.61
   1 -10  -8   12.62    3.65
   1 -10  -7    0.06    1.77
  -1 -10   7    2.52    1.65
   1 -10  -7    5.79    1.68
  -1 -10   7    0.87    1.34
   1 -10  -7    3.74    2.37
   1 -10  -7    0.26    1.66
   1 -10  -7    3.50    2.02
   1 -10  -6   14.66    2.13
  -1 -10   6   11.36    1.95
   1 -10  -6   12.91    2.35
  -1 -10   6   16.11    2.34
   1 -10  -6   11.93    3.05
   1 -10  -6   17.13    3.01
   1 -10  -6   15.77    2.62
   1 -10  -5    3.60    1.85
  -1 -10   5    4.18    1.67
   1 -10  -5    5.83    2.02
  -1 -10   5    4.58    1.90
   1 -10  -5    3.14    1.91
   1 -10  -5    6.77    1.83
   1 -10  -5    2.65    1.89
   1 -10  -4    3.27    1.96
  -1 -10   4    6.06    1.92
   1 -10  -4    5.49    1.56
  -1 -10   4    5.24    1.54
   1 -10  -4    2.75    1.72
   1 -10  -4    5.09    2.02
   1 -10  -3    0.58    1.38
  -1 -10   3    0.71    1.69
   1 -10  -3    1.31    1.68
   1 -10  -2    7.78    2.22
  -1 -10   2    9.43    1.60
   1 -10  -2    8.21    1.57
  -1 -10   2   11.32    1.96
   1 -10  -1    2.96    2.15
  -1 -10   1    0.77    1.48
  -1 -10   1    2.12    1.49
   1 -10  -1   -0.19    1.89
  -1 -10   0   12.00    2.06
   1 -10   0   11.00    2.40
  -1 -10   0   13.08    2.46
   1 -10   0   13.46    2.46
  -1 -10  -1    3.71    1.99
   1 -10   1    3.78    1.44
  -1 -10  -1    7.17    1.99
   1 -10   1    3.06    1.79
  -1 -10  -1    7.39    2.20
  -1 -10  -2    0.93    1.25
   1 -10   2    1.67    1.91
  -1 -10  -2   -2.27    1.42
   1 -10   2   -0.26    1.45
  -1 -10  -2   -0.88    1.56
  -1 -10  -3   -0.88    1.62
   1 -10   3    0.20    1.22
  -1 -10  -3    0.55    1.47
   1 -10   3    1.23    1.62
  -1 -10  -3   -0.45    2.01
  -1 -10  -4    0.97    1.35
   1 -10   4    1.12    1.65
  -1 -10  -4   -1.57    1.85
   1 -10   4    0.53    1.70
  -1 -10  -4   -2.46    1.53
   1 -10   5    1.93    1.49
  -1 -10  -5   -4.64    2.15
   1 -10   5   -2.02    1.28
  -1 -10  -5   -1.22    2.12
   1 -10   6   -2.45    1.48
  -1 -10  -6    1.25    1.98
   1 -10   6    3.01    1.69
  -1 -10  -6   -0.67    2.65
  -1 -10  -6   -1.26    1.73
   1 -10   7    0.47    1.48
  -1 -10  -7    3.30    2.18
   1 -10   7    2.07    1.63
  -1 -10  -7    0.32    2.09
   1 -10   8    0.61    1.53
  -1 -10  -8   -0.01    2.14
   1 -10   8   -0.55    1.62
  -1 -10  -8    0.67    2.20
   1 -10   9    2.91    1.73
  -1 -10  -9   -1.95    1.71
  -1 -10  -9   -4.72    2.93
   1 -10  10   10.22    2.03
  -1 -10 -10   14.02    2.77
  -1 -10 -10    6.04    2.93
   1 -10  11    9.34    1.73
  -1 -10 -11    6.60    2.45
   1 -10  12    0.21    1.60
  -1 -10 -12    2.56    2.62
  -1 -10 -12   -2.94    2.25
   1 -10  13   13.47    2.02
  -1 -10 -13    3.28    2.89
   1 -10  14    2.70    1.80
  -1 -10 -14   -0.49    2.58
  -1 -10 -14    3.05    2.79
   1 -10  15   -0.29    1.73
  -1 -10 -15    0.49    3.01
  -1 -10 -15    0.06    2.47
   1 -11 -15    1.23    3.29
   1 -11 -14    0.60    2.88
   1 -11 -14    2.21    3.24
   1 -11 -13    0.48    2.34
   1 -11 -13    1.27    3.14
   1 -11 -12    3.34    2.05
   1 -11 -12   -1.23    2.42
   1 -11 -11   -0.46    1.80
   1 -11 -11    1.01    2.36
   1 -11 -10    1.41    2.19
   1 -11 -10   -1.35    2.57
  -1  11   9    1.10    1.65
   1 -11  -9    0.73    2.34
   1 -11  -9    2.12    2.78
  -1  11   8    2.27    1.77
   1 -11  -8    3.66    1.77
   1 -11  -8    0.58    3.76
  -1  11   7    2.41    1.55
   1 -11  -7    4.59    1.80
   1 -11  -6    7.64    2.17
   1 -11  -6    4.26    1.70
  -1 -11   6    3.86    2.49
   1 -11  -6    5.71    2.22
   1 -11  -5   12.40    2.09
  -1 -11   5   17.14    2.35
   1 -11  -5   16.18    2.38
   1 -11  -4    3.88    1.81
   1 -11  -4    2.81    2.28
  -1 -11   4    3.16    2.22
   1 -11  -4   -1.00    2.37
   1 -11  -3   -0.59    1.69
  -1 -11   3    4.88    1.68
   1 -11  -3    0.58    2.17
   1 -11  -2    1.52    1.66
   1 -11  -2    6.65    1.69
  -1 -11   2   -1.31    1.49
   1 -11  -2   -1.79    2.13
   1 -11  -1    3.25    1.47
  -1 -11   1    5.22    2.05
   1 -11  -1    4.89    1.63
   1 -11  -1   -2.18    2.33
  -1 -11   1   -1.83    1.76
  -1 -11   0    1.17    1.97
   1 -11   0    2.11    1.77
  -1 -11   0    0.32    1.67
   1 -11   1    1.79    1.50
  -1 -11  -1    0.43    2.16
   1 -11   1    1.07    1.87
  -1 -11  -1   -2.29    2.06
   1 -11   2    3.66    1.54
  -1 -11  -2    6.54    2.22
   1 -11   2    5.29    2.06
  -1 -11  -2    7.21    2.30
   1 -11   3   -0.96    1.41
  -1 -11  -3    2.71    2.18
   1 -11   3    4.87    2.00
  -1 -11  -3    3.16    2.13
   1 -11   4    2.71    1.72
  -1 -11  -4    5.16    1.70
   1 -11   4    4.35    1.95
  -1 -11  -4    3.37    1.72
   1 -11   5    6.05    1.64
  -1 -11  -5    3.62    2.30
   1 -11   5    9.63    2.16
  -1 -11  -5    3.46    1.81
   1 -11   6   -0.38    1.67
  -1 -11  -6    1.25    1.67
   1 -11   7    3.63    1.45
  -1 -11  -7   -0.01    1.70
   1 -11   7    1.64    2.10
   1 -11   8    1.90    2.09
  -1 -11  -8   -0.68    1.65
  -1 -11  -8   -4.00    3.56
   1 -11   9   -1.04    2.04
  -1 -11  -9   -0.68    2.37
  -1 -11  -9    2.37    3.79
   1 -11  10    8.38    2.35
  -1 -11 -10    7.47    2.31
  -1 -11 -10    2.39    2.59
   1 -11  11   14.70    2.23
  -1 -11 -11   14.75    2.63
  -1 -11 -11   -0.71    4.64
   1 -11  12    2.45    1.84
  -1 -11 -12    6.12    2.09
  -1 -11 -12    3.66    3.03
   1 -11  13    1.32    2.41
  -1 -11 -13   -2.47    2.45
  -1 -11 -13   -1.53    5.01
  -1 -11 -14    1.12    2.66
   1 -12 -13    2.29    2.85
   1 -12 -12   -3.38    2.49
   1 -12 -11    0.86    2.29
   1 -12 -10   -2.22    2.00
   1 -12  -9    1.52    2.23
   1 -12  -8    1.13    1.88
   1 -12  -7    0.50    1.80
   1 -12  -6    0.67    1.83
   1 -12  -5   -0.37    2.17
  -1 -12   5   -0.34    1.86
   1 -12  -5    0.30    1.72
  -1 -12   5    2.92    1.93
   1 -12  -4   -0.58    1.66
  -1 -12   4    0.86    2.06
   1 -12  -4    4.27    2.20
  -1 -12   4    4.36    2.37
   1 -12  -3    1.73    2.52
  -1 -12   3    1.73    1.84
   1 -12  -3   -0.66    2.53
  -1 -12   3    0.35    2.75
  -1 -12   2    6.36    2.37
   1 -12  -2    0.88    2.06
   1 -12  -2    6.68    1.89
  -1 -12   2    4.07    3.07
   1 -12  -1    5.23    1.85
  -1 -12   1    6.81    2.42
   1 -12  -1    6.46    1.83
  -1 -12   1    0.61    2.10
   1 -12  -1    4.12    1.80
   1 -12   0    6.55    2.48
  -1 -12   0   13.05    2.37
   1 -12   0   13.13    2.39
  -1 -12   0   11.10    2.23
   1 -12   0   11.79    2.46
   1 -12   1    1.74    2.55
  -1 -12  -1    0.22    1.63
   1 -12   1    2.01    1.56
  -1 -12  -1    1.40    2.13
   1 -12   1   -1.28    2.19
   1 -12   2    6.90    2.49
  -1 -12  -2    9.68    1.96
   1 -12   2    7.87    2.25
  -1 -12  -2    4.21    1.79
   1 -12   2    3.78    2.46
   1 -12   3   -2.26    2.22
  -1 -12  -3    0.85    1.76
   1 -12   3    4.53    2.17
  -1 -12  -3    1.10    1.76
   1 -12   4    0.36    2.15
  -1 -12  -4   -1.21    1.79
   1 -12   4   -2.60    2.38
   1 -12   5    1.04    2.51
  -1 -12  -5    2.22    2.29
   1 -12   5   -0.34    2.23
   1 -12   6    1.58    2.06
  -1 -12  -6   -0.20    1.85
   1 -12   7    5.10    1.95
  -1 -12  -7    7.99    2.67
   1 -12   8   -0.57    1.76
  -1 -12  -8   -0.87    2.20
  -1 -12  -9    5.20    2.01
  -1 -12 -10    4.15    2.67
  -1 -12 -11   -2.51    2.33
  -1  12 -11    1.46    2.29
   1 -13 -10   -0.09    2.77
   1 -13  -9    2.74    2.38
   1 -13  -8    2.64    2.17
   1 -13  -7    3.91    1.90
  -1 -13   7    0.76    2.94
   1 -13  -6    0.85    2.84
  -1 -13   6    0.79    1.94
   1 -13  -5    0.58    2.29
  -1 -13   5   -0.11    2.38
   1 -13  -4   -1.97    2.15
  -1 -13   4    2.52    2.26
  -1 -13   3    2.02    2.55
   1 -13  -3    1.03    2.25
   1 -13  -3    0.12    1.73
  -1 -13   3   -1.35    1.99
  -1 -13   2   -0.46    2.79
   1 -13  -2    0.95    2.22
   1 -13  -2    0.80    2.27
  -1 -13   2    1.03    2.12
  -1 -13   1    1.62    2.24
   1 -13  -1    2.25    1.77
  -1 -13   1    3.45    2.22
   1 -13  -1    3.27    1.75
  -1 -13   0    6.22    2.31
   1 -13   0    7.23    2.41
  -1 -13   0    9.94    2.43
  -1 -13  -1    3.93    1.97
   1 -13   1    5.89    1.93
  -1 -13  -1    4.83    2.06
   1 -13   1    5.88    2.64
   1 -13   2    1.97    2.35
   1 -13   2    2.82    1.85
  -1 -13  -3    1.29    1.93
   1 -13   3   -0.55    2.00
   1 -13   3    2.29    2.77
  -1 -13  -4    4.41    2.23
   1 -13   4    6.82    2.43
   1 -13   4    4.34    2.30
  -1 -13  -5   -3.82    2.27
  -1 -13  -6    1.25    1.94
   1 -13   6    0.47    2.40
  -1 -13  -7    2.15    3.05
   1 -13   7    1.40    2.55
  -1 -13  -8   -2.02    2.09
  -1 -13  -9    2.75    2.45
   1 -14  -4    6.01    2.51
   1 -14  -3    3.82    2.45
   1 -14  -2   -0.18    2.74
   1 -14  -1    5.96    2.40
   1 -14   1   -0.61    2.06
  -2   0  25    0.33    1.39
  -2   0  25    1.10    2.31
  -2   0  24    5.25    1.53
  -2   0  24    8.75    2.21
  -2   0  23   -1.13    1.46
  -2   0  23    0.21    1.51
  -2   0  22    1.04    1.45
  -2   0  22    1.25    1.47
  -2   0  21   -1.23    1.64
  -2   0  21    1.45    1.46
  -2   0  20   10.26    1.55
  -2   0  20   11.37    2.27
  -2   0  19   -0.35    1.18
  -2   0  19   -1.67    1.39
  -2   0  18   15.48    2.27
  -2   0  18   13.24    2.05
  -2   0  17   -2.48    1.41
  -2   0  17    2.08    1.26
  -2   0  16   14.86    1.93
  -2   0  16   15.90    2.20
  -2   0  15   -1.59    2.37
  -2   0  15   -0.83    1.04
  -2   0  15    2.39    2.58
  -2   0  15   -1.21    1.62
   2   0 -15   -1.52    1.60
  -2   0  14   -0.08    2.02
  -2   0  14    3.70    1.24
  -2   0  14    4.88    2.06
  -2   0  14    2.17    1.58
   2   0 -14    2.01    1.48
  -2   0  13   -1.04    1.76
  -2   0  13    1.04    1.03
  -2   0  13    0.38    2.24
  -2   0  13    0.62    1.50
   2   0 -13   -0.69    2.14
  -2   0  12    2.74    1.79
  -2   0  12    1.30    1.43
  -2   0  12    3.25    2.00
  -2   0  12    0.73    1.44
  -2   0  11    0.81    1.62
  -2   0  11    1.48    3.68
  -2   0  11   -0.03    1.00
  -2   0  10  291.54   11.36
  -2   0   9   -0.54    1.53
  -2   0   8   49.95    3.59
   2   0  -8   43.67    3.72
  -2   0   7   -0.56    1.54
   2   0  -7   -0.94    1.35
  -2   0   6  576.28   11.82
   2   0  -6  516.19   11.49
  -2   0   5   -0.53    1.49
   2   0  -5   -1.17    1.86
  -2   0   4    6.49    2.23
   2   0  -4    6.44    2.10
  -2   0   3   -0.63    1.99
   2   0  -3    0.25    1.94
  -2   0   2   93.23    5.72
   2   0  -1   -0.09    1.44
  -2   0   1    0.22    1.41
   2   0   0   70.51    4.75
  -2   0   0   77.36    4.91
   2   0   1   -0.76    1.61
  -2   0  -1   -0.30    1.61
   2   0   2  793.61   13.96
  -2   0  -2  741.40   13.91
   2   0   3   -0.99    2.25
  -2   0  -3    0.49    1.43
   2   0   5   -2.41    2.23
  -2   0  -5   -1.22    1.44
   2   0   6  155.27    6.39
   2   0   7   -0.29    1.53
   2   0   8    4.32    2.41
   2   0   9   -0.63    1.55
   2   0   9    0.64    0.95
   2   0   9   -1.12    1.00
   2   0  10   -0.29    1.60
   2   0  10    0.16    0.98
   2   0  10    0.31    1.12
  -2   0 -10    1.10    2.13
   2   0  11   -1.39    1.70
   2   0  11    1.06    0.93
   2   0  11   -0.09    1.10
  -2   0 -11   -0.73    1.49
   2   0  12   21.49    2.95
   2   0  12   25.19    2.09
   2   0  12   24.95    2.48
   2   0  13    1.06    2.17
   2   0  13    0.76    0.99
   2   0  13    0.56    1.78
  -2   0 -13    1.37    1.84
   2   0  14    0.57    1.52
   2   0  14   -0.68    1.64
  -2   0 -14    0.72    2.05
   2   0  15   -1.12    1.07
   2   0  15   -1.95    1.67
   2   0  15   -0.27    1.33
   2   0  16   22.29    2.79
   2   0  16   20.92    2.96
   2   0  17   -0.79    1.42
   2   0  17   -0.61    1.32
   2   0  18   28.45    2.25
   2   0  18   24.25    3.10
   2   0  19   -1.20    1.40
   2   0  19   -1.94    2.32
   2   0  20    1.81    1.41
   2   0  20    4.64    1.73
   2   0  21   -1.43    1.39
   2   0  21    0.00    2.13
   2   0  22    6.17    1.64
   2   0  22    1.11    2.49
   2   0  23    2.42    1.91
   2   0  23   -2.25    2.11
  -2  -1  25    4.96    1.46
  -2   1  25    4.71    1.55
  -2  -1  25    0.53    2.24
  -2   1  25    1.61    2.87
  -2  -1  24   -0.11    1.56
  -2   1  24   -0.16    1.44
  -2  -1  24   -1.95    1.74
  -2   1  24   -4.73    1.90
  -2  -1  23    2.54    1.54
  -2   1  23    3.91    1.27
  -2  -1  23   -0.27    1.97
  -2   1  23    3.18    1.97
  -2  -1  22   -3.30    1.61
  -2   1  22   -1.29    1.46
  -2  -1  22    1.26    1.93
  -2   1  22    2.25    1.93
  -2  -1  21    7.45    1.54
  -2   1  21    8.47    1.66
  -2  -1  21   10.25    2.13
  -2   1  21    8.80    1.93
  -2  -1  20   14.01    1.95
  -2   1  20   13.03    1.83
  -2  -1  20    8.90    1.86
  -2   1  20    9.47    2.03
  -2  -1  19    1.85    1.22
  -2   1  19    3.71    1.73
  -2  -1  19    2.91    1.48
  -2   1  19    0.72    1.42
  -2  -1  18   11.11    1.76
  -2   1  18   12.42    1.89
  -2  -1  18   13.43    2.07
  -2   1  18    8.61    1.58
  -2  -1  17    4.72    1.29
  -2   1  17    1.08    1.20
  -2  -1  17    1.87    1.33
  -2   1  17    4.93    1.90
   2  -1 -17   -0.32    2.46
  -2  -1  16    2.35    1.43
  -2   1  16    1.16    1.69
  -2  -1  16    0.73    1.29
  -2   1  16    1.38    1.26
   2  -1 -16    0.34    1.67
  -2  -1  15    3.61    3.53
  -2  -1  15    2.06    1.13
  -2   1  15    0.18    1.12
  -2  -1  15    4.58    2.52
  -2   1  15    5.22    2.42
  -2  -1  15    4.29    1.29
  -2   1  15    2.42    1.22
   2  -1 -15    3.38    1.94
  -2  -1  14   41.59    4.32
  -2   1  14   38.86    4.20
  -2  -1  14   54.38    4.24
  -2   1  14   50.79    4.07
  -2  -1  14   43.92    4.62
  -2   1  14   44.12    4.44
  -2  -1  14   53.46    4.38
  -2   1  14   50.47    4.19
   2  -1 -14   47.46    5.43
  -2  -1  13   35.48    3.55
  -2   1  13   34.64    3.49
  -2  -1  13   37.13    2.38
  -2   1  13   35.79    2.23
  -2  -1  13   44.27    3.81
  -2   1  13   42.15    3.52
  -2  -1  13   37.62    2.31
  -2   1  13   38.47    5.07
   2  -1 -13   38.31    3.98
  -2  -1  12   15.05    2.25
  -2   1  12   15.84    2.39
  -2  -1  12   17.28    1.77
  -2   1  12   20.19    2.20
  -2  -1  12   12.12    2.82
  -2   1  12   15.14    3.03
  -2  -1  12   19.51    2.01
  -2   1  12   21.85    2.10
  -2  -1  11    3.84    1.71
  -2   1  11    8.26    2.62
  -2  -1  11    4.14    1.39
  -2   1  11    7.76    1.28
  -2  -1  11    2.59    1.96
  -2   1  11    6.50    2.58
  -2  -1  11    4.35    1.13
  -2   1  11    4.54    1.50
   2  -1 -11    4.09    1.33
  -2  -1  10   -0.89    1.96
  -2   1  10    1.92    2.25
  -2  -1  10    0.23    1.25
  -2   1  10   -0.78    0.91
  -2  -1  10    0.75    2.01
  -2  -1  10    2.46    1.43
  -2   1  10   -0.42    1.22
  -2  -1   9   28.22    2.96
  -2   1   9   27.68    3.10
  -2  -1   8  410.03    9.59
  -2   1   8  403.83    9.55
   2   1  -8  365.25    9.63
  -2  -1   7   24.69    2.75
  -2   1   7   23.94    3.01
   2   1  -7   23.24    2.80
   2  -1  -7   21.33    2.48
  -2  -1   6  196.60    8.13
  -2   1   6  199.39    8.51
   2   1  -6  167.24    7.38
   2  -1  -6  179.08    7.56
  -2  -1   5 1913.10   25.68
   2   1  -5 1858.31   25.86
  -2   1   5 1932.14   25.95
   2  -1  -5 1794.50   25.05
  -2  -1   4  998.74   16.10
   2   1  -4  947.14   16.16
  -2   1   4 1046.80   16.96
   2  -1  -4 1014.38   17.76
  -2  -1   3   13.56    2.18
   2   1  -3   14.61    2.30
  -2   1   3   14.18    2.70
   2  -1  -3   13.77    2.12
  -2   1   2    7.96    2.17
   2   1  -2    6.66    2.04
  -2   1   2    6.31    2.37
   2  -1  -1   67.51    4.72
  -2   1   1   69.44    4.67
   2   1  -1   68.09    4.69
   2  -1   0   88.45    5.51
  -2   1   0   81.29    5.24
   2   1   0   87.99    5.53
  -2  -1   0   86.27    5.51
   2  -1   1  207.30    8.62
  -2   1  -1  213.36    8.82
   2   1   1  223.20    9.19
  -2  -1  -1  200.88    9.65
   2  -1   2   99.60    6.06
  -2   1  -2   99.34    5.96
   2   1   2  105.70    4.85
  -2  -1  -2   91.80    5.62
  -2   1  -3  515.62   11.09
   2   1   3  546.60   11.46
  -2  -1  -3  512.66   11.28
   2  -1   4  210.69    8.72
  -2   1  -4  181.83    6.05
   2   1   4  190.27    8.06
  -2  -1  -4  170.75    7.23
   2  -1   5  421.85    9.66
  -2  -1  -5  388.80    9.67
   2  -1   6  366.58    8.77
   2   1   6  346.21    8.23
   2  -1   7   14.03    2.14
   2   1   7    9.06    2.44
   2  -1   8   32.29    2.80
   2   1   8   28.71    2.68
   2  -1   9    1.85    1.60
   2   1   9   -4.13    2.05
   2  -1   9   -0.25    1.16
   2   1   9   -0.28    1.17
   2  -1   9   -0.10    1.06
   2   1   9    0.49    1.45
  -2  -1  -9    0.18    2.07
   2  -1  10    1.98    1.68
   2   1  10    0.62    1.67
   2  -1  10    0.22    0.88
   2   1  10    0.19    0.89
   2  -1  10   -0.56    1.06
   2   1  10    0.43    1.06
  -2  -1 -10    1.94    1.51
   2  -1  11    3.37    2.58
   2   1  11    3.30    1.90
   2  -1  11    2.83    1.00
   2   1  11    4.70    1.43
   2  -1  11    3.51    1.65
   2   1  11    3.80    1.21
  -2   1 -11    4.75    2.11
   2  -1  12    0.82    1.93
   2   1  12    0.25    1.91
   2  -1  12   -0.06    1.32
   2   1  12    0.51    0.98
   2  -1  12    1.98    1.21
   2   1  12    0.66    1.21
  -2  -1 -12    2.80    1.64
   2  -1  13   36.31    4.07
   2   1  13   37.75    4.58
   2  -1  13   50.19    4.00
   2   1  13   48.68    3.95
   2  -1  13   44.65    4.21
   2  -1  13   48.54    4.01
   2   1  13   50.56    4.25
  -2  -1 -13   57.46    5.56
   2  -1  14   11.95    1.51
   2   1  14   10.06    1.75
   2  -1  14    8.38    1.61
   2  -1  14    8.77    2.24
   2   1  14   12.66    2.06
  -2  -1 -14   13.54    2.69
   2  -1  15   16.52    1.87
   2   1  15   16.90    1.96
   2  -1  15   17.58    2.45
   2   1  15   18.09    2.12
  -2  -1 -15   15.55    2.74
   2  -1  16    0.44    1.67
   2   1  16   -0.56    1.05
   2  -1  16   -0.62    1.31
   2   1  16    4.18    1.81
  -2  -1 -16    1.17    2.53
   2  -1  17    5.68    1.33
   2   1  17    6.29    1.33
   2  -1  17    7.00    2.09
   2   1  17    8.16    2.04
   2  -1  18    5.76    1.65
   2   1  18    4.48    1.53
   2  -1  18    5.72    1.68
   2   1  18    4.39    1.55
   2  -1  19   -0.71    1.59
   2   1  19    0.47    1.42
   2  -1  19   -2.34    1.83
   2   1  19   -1.96    1.77
   2  -1  20    0.54    1.54
   2   1  20    1.16    1.42
   2  -1  20    2.71    1.75
   2   1  20    0.39    1.90
   2  -1  21    2.77    1.23
   2   1  21    3.94    1.45
   2  -1  21    2.00    1.87
   2   1  21    0.94    2.06
   2  -1  22   -0.35    1.31
   2  -1  22   -1.55    2.01
   2   1  22    2.18    2.55
   2  -1  23   -0.67    1.50
   2   1  23   -1.05    1.30
  -2  -2  24    4.60    1.68
  -2   2  24    3.12    1.44
  -2  -2  24   -1.96    1.84
  -2  -2  23    1.01    1.55
  -2   2  23    2.01    1.27
  -2  -2  23    2.62    2.13
  -2  -2  22    6.14    1.92
  -2   2  22    3.60    1.57
  -2  -2  22    3.74    2.33
  -2   2  22    6.54    2.31
  -2  -2  21   -0.62    1.22
  -2   2  21    4.55    1.67
  -2  -2  21    2.01    1.58
  -2   2  21    4.19    1.85
  -2  -2  20    3.44    1.28
  -2   2  20    2.15    1.69
  -2  -2  20   -0.26    1.50
  -2   2  20    0.46    1.35
   2  -2 -20   -0.81    2.95
  -2  -2  19   -1.18    1.58
  -2   2  19    0.04    1.22
  -2  -2  19   -1.20    1.72
  -2   2  19   -1.09    1.33
   2  -2 -19   -0.40    2.03
  -2  -2  18   16.29    2.14
  -2   2  18   16.45    2.24
  -2  -2  18   17.87    2.45
  -2   2  18    9.26    2.10
   2  -2 -18    6.76    2.67
  -2  -2  17    4.37    1.48
  -2   2  17    4.58    1.88
  -2  -2  17    3.34    1.36
  -2   2  17    5.32    1.37
   2  -2 -17    5.56    1.98
  -2  -2  16    2.54    1.15
  -2   2  16    3.45    1.29
  -2  -2  16    2.91    1.63
  -2   2  16    4.14    1.66
   2  -2 -16    4.35    2.19
  -2  -2  15   17.78    3.60
  -2  -2  15   24.33    2.36
  -2   2  15   23.26    2.59
  -2   2  15   23.70    3.46
  -2  -2  15   23.87    2.44
  -2   2  15   23.29    2.37
   2  -2 -15   20.53    3.75
  -2  -2  14    6.68    2.40
  -2   2  14    5.45    2.31
  -2  -2  14    6.01    1.23
  -2   2  14    6.03    1.27
  -2  -2  14    8.20    2.73
  -2   2  14    5.55    2.53
  -2  -2  14   10.44    1.73
  -2   2  14    9.98    1.43
   2  -2 -14   10.20    2.25
  -2  -2  13   11.26    2.30
  -2   2  13    6.87    2.21
  -2  -2  13    9.41    1.59
  -2   2  13    9.01    1.34
  -2  -2  13    9.88    2.12
  -2   2  13    7.69    2.65
  -2  -2  13   11.82    1.50
  -2   2  13   10.40    1.43
   2  -2 -13    7.54    2.08
  -2  -2  12   -1.93    2.20
  -2   2  12    1.77    1.88
  -2  -2  12    2.20    0.97
  -2   2  12    0.71    1.03
  -2  -2  12   -0.03    2.04
  -2   2  12    1.56    2.15
  -2  -2  12    1.93    1.43
  -2   2  12    1.16    1.39
   2  -2 -12    1.75    1.76
  -2  -2  11   65.17    4.60
  -2   2  11   60.42    4.33
  -2  -2  11   66.52    3.53
  -2   2  11   71.00    3.83
  -2  -2  11   67.19    4.75
  -2   2  11   66.41    5.10
  -2  -2  11   71.07    3.91
  -2   2  11   66.51    3.62
   2  -2 -11   70.39    4.50
   2  -2 -11   59.90    3.76
  -2  -2  10   34.63    3.35
  -2   2  10   33.52    3.45
  -2  -2  10   35.95    2.22
  -2   2  10   31.72    2.20
  -2  -2  10   30.51    3.09
  -2  -2  10   34.52    2.47
  -2   2  10   36.29    2.53
   2  -2 -10   24.16    2.54
   2  -2 -10   37.48    2.55
  -2  -2   9  277.59   10.51
  -2   2   9  283.63   10.87
  -2  -2   8    1.16    1.35
  -2   2   8    3.08    1.74
   2   2  -8    2.78    1.60
  -2  -2   7    0.09    1.31
   2   2  -7    0.19    1.83
  -2   2   7    0.64    1.66
  -2  -2   6  147.86    6.25
   2   2  -6  138.07    6.46
  -2   2   6  136.25    6.01
   2  -2  -6  138.62    6.58
   2   2  -5  978.39   16.87
  -2   2   5  958.01   16.50
  -2  -2   4  243.34    9.61
   2   2  -4  240.43    9.76
  -2   2   4  252.84   10.16
   2  -2  -4  235.71    9.73
  -2   2   3   37.87    3.30
   2   2  -3   58.98    3.51
  -2   2   3   35.43    3.48
  -2  -2   2  978.56   16.29
  -2   2   2 1000.83   16.50
   2   2  -2 1003.96   16.57
  -2   2   2 1069.08   17.87
   2  -2  -1  150.92    6.76
   2   2  -1  149.47    6.41
  -2   2   1  148.11    6.18
   2   2  -1  148.35    6.56
   2  -2   0  132.12    6.08
  -2   2   0  133.24    5.89
   2   2   0  126.23    5.78
  -2  -2   0  135.21    6.18
   2  -2   1   51.74    3.70
  -2   2  -1   52.65    3.54
   2   2   1   50.78    3.27
  -2  -2  -1   49.81    3.55
   2  -2   2  318.24   11.73
  -2   2  -2  316.12   11.89
   2   2   2  302.27   11.43
  -2  -2  -2  305.16   11.65
   2  -2   3    8.77    1.92
  -2   2  -3    7.60    1.73
   2   2   3    8.79    2.39
  -2  -2  -3    8.52    2.23
   2  -2   4  110.83    5.47
  -2   2  -4  105.00    4.77
   2   2   4  114.23    5.62
  -2  -2  -4   95.69    6.01
   2  -2   5   13.74    2.12
  -2   2  -5   12.84    2.02
   2   2   5   18.07    2.79
  -2  -2  -5   14.72    2.18
   2  -2   6    1.35    2.25
   2   2   6    0.61    2.20
   2  -2   7    8.53    1.90
   2   2   7    8.46    1.90
   2  -2   8    2.50    2.27
   2   2   8    1.27    1.53
   2  -2   8    1.68    1.18
   2  -2   8    3.20    1.54
   2  -2   9   52.30    3.66
   2   2   9   44.10    3.43
   2  -2   9   46.07    2.54
   2   2   9   47.60    2.84
  -2  -2  -9   47.71    4.06
   2  -2   9   49.85    3.09
   2   2   9   44.20    2.84
  -2  -2  -9   61.69    4.62
   2  -2  10   59.42    4.12
   2   2  10   67.69    4.45
   2  -2  10   62.07    3.31
   2   2  10   63.86    3.49
  -2  -2 -10   60.58    4.39
   2  -2  10   59.49    3.65
   2  -2  10   63.81    3.59
   2   2  10   61.72    3.96
  -2  -2 -10   71.00    5.51
   2  -2  11   34.74    3.45
   2   2  11   33.76    3.32
   2  -2  11   35.26    2.65
   2   2  11   34.82    2.62
  -2  -2 -11   39.42    3.65
   2  -2  11   35.82    2.60
   2  -2  11   36.15    2.22
   2   2  11   38.70    2.58
  -2  -2 -11   42.69    3.35
   2  -2  12    3.13    2.15
   2   2  12    1.10    2.44
   2  -2  12    4.05    1.30
   2   2  12    1.32    1.00
   2  -2  12    2.83    1.42
   2  -2  12    1.86    1.69
   2   2  12    4.04    1.27
  -2  -2 -12    5.45    2.38
   2  -2  13   21.88    3.18
   2  -2  13   27.32    2.71
   2   2  13   24.33    2.15
   2  -2  13   22.70    2.25
   2  -2  13   25.25    2.65
   2   2  13   24.18    2.28
  -2  -2 -13   26.73    4.71
   2  -2  14   21.20    2.14
   2   2  14   19.86    2.12
   2  -2  14   19.34    2.67
   2   2  14   16.94    2.33
  -2  -2 -14   18.02    3.52
   2  -2  15    2.00    1.14
   2   2  15    2.71    1.29
   2   2  15    3.86    1.39
  -2  -2 -15   -0.25    2.67
   2  -2  16   34.67    2.69
   2   2  16   33.60    2.91
   2  -2  16   29.25    2.98
   2   2  16   29.42    2.80
  -2  -2 -16   19.66    3.51
   2  -2  17    2.42    1.14
   2   2  17   -0.05    1.12
   2  -2  17   -0.06    2.12
   2   2  17   -2.35    1.65
  -2  -2 -17    1.43    3.00
   2  -2  18    1.33    1.40
   2   2  18    4.18    1.23
   2  -2  18    2.23    1.72
   2  -2  19   -0.52    1.11
   2   2  19    1.17    1.13
   2  -2  19   -1.31    2.06
   2   2  19   -1.58    1.39
   2  -2  20    2.19    1.40
   2   2  20   -0.22    1.40
   2  -2  20   -0.74    2.32
   2   2  20    0.94    1.86
   2  -2  21    3.34    1.64
   2   2  21    4.36    1.27
   2  -2  21    4.84    2.18
   2   2  21    5.12    2.40
   2  -2  22    0.35    1.31
   2   2  22    0.71    1.45
   2  -2  22   -1.79    2.27
   2   2  22   -1.82    2.15
   2  -2  23   -1.34    1.49
   2  -2  23   -1.31    2.24
  -2  -3  24    4.34    1.51
  -2   3  24    0.00    1.49
  -2  -3  24    1.22    2.53
  -2  -3  23    5.34    1.60
  -2   3  23    4.32    1.58
  -2  -3  23    2.08    1.87
  -2  -3  22    3.39    1.26
  -2   3  22    2.82    1.75
  -2  -3  22    3.97    2.00
  -2   3  22    5.08    1.86
  -2   3  21    9.91    1.48
  -2  -3  21   11.93    2.48
  -2  -3  20   13.06    1.79
  -2   3  20   15.12    2.01
  -2  -3  20   15.48    2.48
  -2   3  20   16.52    1.79
   2  -3 -20    7.21    3.40
  -2  -3  19    0.34    1.51
  -2   3  19    0.76    1.21
  -2  -3  19    3.04    1.95
  -2   3  19    1.51    1.31
   2  -3 -19    3.89    2.12
  -2  -3  18    5.02    1.29
  -2   3  18    1.84    1.23
  -2  -3  18    4.07    1.91
  -2   3  18    1.60    1.59
   2  -3 -18    0.37    3.07
  -2  -3  17   13.42    1.87
  -2   3  17   10.46    1.93
  -2  -3  17   12.86    2.05
  -2   3  17   12.42    2.15
   2  -3 -17    5.21    2.25
  -2  -3  16   11.99    1.40
  -2   3  16   10.39    1.72
  -2  -3  16    8.84    1.90
  -2   3  16    8.05    1.44
   2  -3 -16    2.41    1.84
  -2  -3  15   32.85    2.53
  -2   3  15   32.41    2.70
  -2  -3  15   34.83    2.74
  -2   3  15   33.85    2.68
  -2  -3  14   23.65    4.02
  -2  -3  14   30.31    2.74
  -2   3  14   33.37    3.32
  -2   3  14   24.38    3.38
  -2  -3  14   26.21    2.60
  -2   3  14   24.62    2.23
  -2  -3  13    0.32    1.99
  -2   3  13    1.57    2.82
  -2  -3  13   -0.13    0.90
  -2   3  13    0.37    1.67
  -2  -3  13    0.02    1.68
  -2   3  13    0.57    2.66
   2  -3 -13   -0.63    2.18
  -2   3  13   -0.98    1.37
   2  -3 -13   -1.55    1.88
  -2  -3  12   21.87    3.12
  -2   3  12   25.93    3.74
  -2  -3  12   21.50    1.88
  -2   3  12   17.40    2.04
  -2  -3  12   23.72    3.48
  -2   3  12   16.08    3.14
   2  -3 -12   16.87    2.50
  -2  -3  12   24.89    2.53
  -2   3  12   19.01    2.06
   2  -3 -12   24.03    2.53
   2  -3 -12   26.41    2.42
  -2  -3  11   24.80    2.91
  -2   3  11   30.99    3.81
  -2  -3  11   30.96    2.65
  -2   3  11   34.83    2.91
  -2  -3  11   24.08    3.63
  -2   3  11   28.79    3.37
   2  -3 -11   22.93    2.78
  -2  -3  11   29.03    2.54
  -2   3  11   34.57    2.97
   2  -3 -11   33.61    2.87
   2  -3 -11   33.72    3.08
  -2  -3  10   24.99    2.67
  -2   3  10   24.59    2.90
  -2  -3  10   25.20    1.80
  -2   3  10   26.52    2.18
  -2  -3  10   26.44    3.40
  -2   3  10   26.93    3.13
  -2  -3  10   32.17    2.40
  -2   3  10   23.79    2.28
   2  -3 -10   29.41    2.15
   2  -3 -10   30.91    2.63
  -2  -3   9   25.22    2.61
  -2   3   9   22.52    2.71
  -2   3   9   27.56    2.95
   2  -3  -9   26.63    2.01
   2  -3  -9   24.38    2.06
  -2  -3   8   90.94    5.48
   2   3  -8   79.73    5.41
  -2   3   8   95.12    5.80
  -2  -3   7   33.37    2.89
   2   3  -7   34.76    3.15
  -2   3   7   35.74    2.95
  -2  -3   6   16.90    2.36
   2   3  -6   14.11    2.29
  -2   3   6   16.56    2.27
  -2   3   5    8.50    1.95
  -2  -3   5   11.27    2.15
   2   3  -5   10.38    2.06
  -2   3   5   14.15    2.24
  -2   3   4    8.52    2.47
  -2  -3   4    6.81    1.93
   2   3  -4    5.93    1.74
  -2   3   4    4.76    1.91
  -2   3   3   20.00    2.41
  -2  -3   3   24.10    2.60
   2   3  -3   22.20    2.30
  -2   3   3   22.76    3.05
  -2  -3   2   58.92    3.59
  -2   3   2   57.32    3.79
   2   3  -2   57.33    3.33
  -2   3   2   65.72    4.92
   2  -3  -1  145.43    6.47
  -2   3   1  165.29    6.91
   2   3  -1  151.38    6.41
   2   3  -1  160.75    6.70
   2   3   0  206.80    8.75
   2  -3   0  237.31    9.62
  -2   3   0  214.14    8.78
   2   3   0  220.97    9.10
   2  -3   1  276.49   10.53
  -2   3  -1  258.87   10.53
   2   3   1  268.63   10.37
   2  -3   2   10.23    2.45
  -2   3  -2   11.19    2.27
   2   3   2   12.31    2.42
  -2  -3  -2   14.35    2.17
   2  -3   3   34.48    3.20
  -2   3  -3   29.11    2.63
   2   3   3   33.33    3.19
  -2  -3  -3   28.48    2.73
   2  -3   4   10.67    1.96
  -2   3  -4    8.88    2.41
   2   3   4   13.00    2.08
  -2  -3  -4    9.11    1.98
   2  -3   5    5.28    1.71
   2   3   5    2.96    2.18
   2  -3   6   33.90    2.82
   2   3   6   39.61    3.39
   2  -3   7  133.21    5.95
   2   3   7  144.27    6.33
   2  -3   7  145.50    4.99
  -2  -3  -7  165.53    7.02
   2  -3   8   72.27    4.83
   2   3   8   58.40    4.43
   2  -3   8   70.02    3.74
  -2  -3  -8   67.95    4.44
   2  -3   8   62.08    3.61
  -2  -3  -8   73.38    4.94
   2  -3   9   21.00    2.97
   2   3   9   19.94    2.46
   2  -3   9   19.48    1.48
   2   3   9   22.75    2.03
  -2  -3  -9   20.26    2.58
   2  -3   9   17.84    1.62
   2  -3   9   24.36    2.03
   2   3   9   17.95    1.69
  -2  -3  -9   21.99    2.59
   2  -3  10   41.13    4.20
   2   3  10   44.43    4.14
   2  -3  10   50.19    2.29
   2   3  10   44.56    3.41
  -2  -3 -10   52.60    3.82
   2  -3  10   41.98    3.32
   2  -3  10   49.28    3.88
   2   3  10   44.50    3.56
  -2  -3 -10   58.88    5.30
   2  -3  11   39.60    3.71
   2   3  11   38.26    3.64
   2  -3  11   41.53    2.22
   2   3  11   39.40    2.32
  -2  -3 -11   37.87    3.03
   2  -3  11   41.16    2.52
   2  -3  11   44.50    2.85
   2   3  11   39.20    2.50
  -2  -3 -11   33.81    3.84
   2  -3  12    6.03    2.29
   2   3  12    4.03    2.53
   2  -3  12    5.37    1.48
   2   3  12    6.86    1.52
  -2  -3 -12    4.59    3.07
   2  -3  12    6.80    1.50
   2  -3  12   11.49    2.15
   2   3  12    6.51    1.99
   2  -3  13   51.09    3.12
   2   3  13   45.79    2.92
   2  -3  13   43.29    3.26
   2   3  13   50.14    3.36
  -2  -3 -13   46.43    5.00
   2  -3  14   19.44    2.22
   2   3  14   20.70    2.33
   2  -3  14   18.17    2.20
   2   3  14   13.49    2.06
  -2  -3 -14   14.89    3.06
   2  -3  15    2.02    1.12
   2   3  15    1.62    1.11
   2  -3  15    4.67    2.13
   2   3  15    3.09    1.74
  -2  -3 -15    5.21    2.11
   2  -3  16   36.53    2.91
   2   3  16   40.27    3.27
   2  -3  16   35.94    3.41
   2   3  16   31.65    3.28
  -2  -3 -16   21.34    3.66
   2  -3  17   13.29    2.05
   2   3  17   12.78    1.50
   2  -3  17   15.69    2.98
   2   3  17   12.34    1.71
  -2  -3 -17   12.09    3.12
   2  -3  18    3.57    1.51
   2   3  18    4.43    1.44
   2  -3  18    3.25    1.68
   2   3  18   -0.23    1.82
  -2  -3 -18    1.03    3.00
   2  -3  19    0.23    1.21
   2   3  19    1.88    1.41
   2  -3  19    0.22    2.25
   2  -3  20    4.46    1.27
   2   3  20    4.72    1.31
   2  -3  20    2.59    2.54
   2   3  20    7.53    2.04
   2  -3  21    1.41    1.45
   2  -3  21   -1.43    2.28
   2   3  21   -0.16    2.19
   2  -3  22   -0.68    1.23
   2   3  22    0.50    1.75
   2  -3  22    2.72    2.41
   2   3  22    0.94    2.54
   2  -3  23   -0.56    1.58
   2  -3  23    3.07    3.32
  -2  -4  24    0.42    1.92
  -2  -4  23    1.77    1.36
  -2   4  23    2.26    1.57
  -2  -4  23   -2.55    2.47
  -2   4  23    3.42    2.04
  -2  -4  22    3.48    1.34
  -2   4  22    0.76    1.36
  -2  -4  22   -2.44    2.69
  -2  -4  21    1.02    1.23
  -2   4  21   -1.06    1.53
  -2  -4  21   -0.64    1.95
   2  -4 -21   -0.28    2.53
  -2  -4  20    1.44    1.50
  -2   4  20    1.32    1.24
  -2  -4  20   -0.65    1.61
  -2   4  20    3.58    1.80
   2  -4 -20    1.91    2.25
  -2  -4  19    8.66    1.56
  -2   4  19   15.48    2.15
  -2  -4  19    8.50    1.96
  -2   4  19   12.19    1.63
  -2  -4  18   15.98    2.07
  -2   4  18   18.16    2.63
  -2  -4  18   21.31    2.91
  -2   4  18   22.52    2.68
   2  -4 -18   14.31    2.95
  -2  -4  17    5.80    1.31
  -2   4  17    8.68    1.86
  -2  -4  17    3.02    1.43
  -2   4  17    6.39    1.73
   2  -4 -17    5.41    1.97
  -2  -4  16   58.18    3.53
  -2   4  16   63.75    3.99
  -2  -4  16   57.11    3.70
  -2   4  16   62.24    3.85
   2  -4 -16   57.40    5.20
  -2  -4  15    4.01    1.14
  -2   4  15    5.03    1.74
   2  -4 -15    3.61    1.96
  -2  -4  15    5.68    1.51
  -2   4  15    3.53    1.26
   2  -4 -15    3.29    1.73
  -2  -4  14    5.04    1.24
  -2   4  14    6.04    1.32
  -2  -4  14    5.34    1.36
  -2   4  14    4.72    1.47
   2  -4 -14    8.61    2.40
  -2  -4  13    1.72    1.24
  -2   4  13    2.88    1.18
  -2   4  13    2.42    2.22
   2  -4 -13    1.73    1.84
  -2  -4  13    1.92    1.52
  -2   4  13    2.65    1.50
   2  -4 -13    1.14    1.44
   2  -4 -13    0.74    1.36
  -2   4  12    4.83    3.14
  -2  -4  12    4.98    1.04
  -2   4  12    3.38    1.46
  -2   4  12    7.35    2.56
   2  -4 -12    2.15    1.27
  -2  -4  12    2.62    1.79
  -2   4  12    4.70    1.40
   2  -4 -12    2.77    1.38
   2  -4 -12    1.83    1.34
  -2  -4  11    0.44    1.64
  -2   4  11    1.76    2.05
  -2  -4  11   -0.05    0.81
  -2   4  11    0.14    1.34
  -2  -4  11    1.35    2.04
   2  -4 -11    0.64    1.21
  -2  -4  11    1.87    1.47
  -2   4  11    0.44    1.22
   2  -4 -11   -1.10    1.73
   2  -4 -11    0.17    1.23
  -2  -4  10  137.82    7.05
  -2   4  10  122.37    6.64
  -2  -4  10  141.68    5.98
  -2   4  10  132.94    5.73
  -2  -4  10  142.20    7.51
  -2   4  10  112.93    7.07
  -2  -4  10  140.74    6.34
  -2   4  10  122.46    5.89
   2  -4 -10  154.01    6.81
   2  -4 -10  152.65    6.63
  -2  -4   9   34.76    3.00
  -2   4   9   29.86    2.93
   2  -4  -9   33.92    2.48
  -2  -4   9   32.32    2.18
   2  -4  -9   31.59    2.61
  -2   4   9   26.75    1.97
   2  -4  -9   34.36    2.54
   2  -4  -9   38.83    2.61
  -2  -4   8   86.11    5.18
  -2   4   8   80.96    5.09
   2  -4  -8   87.85    4.82
   2  -4  -8   91.50    4.97
  -2  -4   7  158.00    6.75
  -2   4   7  152.67    6.68
   2  -4  -7  151.88    5.30
   2  -4  -7  160.67    6.38
  -2  -4   6   39.94    3.11
   2   4  -6   30.63    2.87
  -2   4   6   35.67    3.22
  -2  -4   5    4.36    1.88
   2   4  -5    1.10    1.61
  -2   4   5    1.49    2.11
  -2  -4   4  240.14    9.57
   2   4  -4  218.44    9.04
  -2   4   4  225.97    9.27
  -2  -4   3   46.89    3.37
   2   4  -3   42.58    4.89
  -2   4   3   47.51    3.60
   2   4  -2   23.55    2.37
  -2   4   2   27.65    3.23
   2   4  -2   27.77    2.71
   2  -4  -1    0.21    2.16
  -2   4   1    0.11    1.41
   2   4  -1   -0.01    0.97
   2   4  -1    0.43    1.17
   2  -4   0  742.23   14.07
   2   4   0  687.52   13.16
   2   4   0  753.46   14.14
   2   4   1    0.78    1.84
   2  -4   1    1.47    1.66
  -2   4  -1    1.05    1.98
   2   4   1   -0.57    1.86
   2   4   2   10.12    2.29
   2  -4   2   10.24    1.99
   2   4   2   11.94    2.30
   2  -4   3   19.38    2.34
   2   4   3   20.45    2.35
  -2  -4  -3   15.63    2.77
   2  -4   4   -0.59    1.44
   2   4   4   -0.98    2.09
   2  -4   5   34.30    3.11
   2   4   5   30.17    2.74
   2  -4   6    1.80    1.49
   2   4   6    0.85    1.50
   2  -4   6   -0.22    0.97
  -2  -4  -6    0.28    1.24
  -2  -4  -6    1.83    2.00
  -2  -4  -6    0.30    1.12
   2  -4   7   17.44    2.56
   2   4   7   15.58    2.28
   2  -4   7   15.49    1.60
  -2  -4  -7   15.69    2.16
   2  -4   7   17.42    1.80
  -2  -4  -7   20.03    2.92
  -2  -4  -7   19.88    2.19
   2  -4   8   11.41    2.09
   2   4   8   15.31    2.22
   2  -4   8   10.70    1.22
   2   4   8   12.09    1.63
  -2  -4  -8   12.38    1.70
   2  -4   8    7.86    1.59
   2  -4   8   12.29    1.88
  -2  -4  -8   12.57    2.37
   2  -4   9    0.45    2.35
   2   4   9   -0.70    2.29
   2  -4   9    0.51    0.86
   2   4   9    2.32    0.99
  -2  -4  -9   -0.07    1.77
   2  -4   9    0.79    1.54
   2  -4   9   -0.59    1.29
   2   4   9    0.30    1.03
  -2  -4  -9    2.07    1.65
   2  -4  10   27.88    3.10
   2   4  10   24.59    2.97
   2  -4  10   26.34    2.27
   2   4  10   28.45    2.31
  -2  -4 -10   31.50    2.88
   2  -4  10   30.52    2.49
   2  -4  10   27.75    2.67
   2   4  10   23.56    2.32
   2  -4  11   37.20    3.99
   2   4  11   28.86    3.75
   2  -4  11   36.58    3.23
   2   4  11   34.78    3.06
  -2  -4 -11   38.05    3.78
   2  -4  11   34.12    2.06
   2  -4  11   39.06    3.44
   2   4  11   29.03    2.88
  -2  -4 -11   33.08    2.94
   2  -4  12   44.67    4.69
   2  -4  12   57.24    4.55
   2   4  12   60.90    4.86
  -2  -4 -12   63.15    5.84
   2  -4  12   51.41    4.38
   2  -4  12   58.96    4.96
   2   4  12   57.54    5.10
  -2  -4 -12   58.54    7.29
   2  -4  13    3.93    1.11
   2   4  13    4.96    1.38
  -2  -4 -13    2.26    1.71
   2  -4  13    6.98    1.56
   2   4  13    4.78    1.26
  -2  -4 -13    9.65    2.26
   2  -4  14   -0.09    1.08
   2   4  14    0.68    1.41
   2  -4  14    0.21    1.80
   2   4  14    0.53    1.13
  -2  -4 -14    6.24    2.07
   2  -4  15   31.00    2.68
   2   4  15   24.00    2.96
   2  -4  15   28.15    2.87
   2   4  15   26.06    2.77
  -2  -4 -15   16.88    4.06
   2  -4  16    0.07    1.37
   2   4  16   -0.15    1.05
   2  -4  16    2.09    2.19
   2   4  16   -0.66    1.62
  -2  -4 -16   -2.84    2.88
   2  -4  17    8.36    1.80
   2   4  17    5.55    1.39
   2  -4  17   -1.18    2.17
   2   4  17    3.86    1.57
  -2  -4 -17    4.04    2.22
   2  -4  18    1.71    1.65
   2  -4  18    1.46    2.39
   2   4  18   -0.98    2.03
   2  -4  19   -0.69    1.17
   2   4  19    3.31    1.63
   2  -4  19    1.55    1.85
   2   4  19    1.49    1.97
   2  -4  20   -0.45    1.70
   2   4  20   -0.62    1.14
   2  -4  20   -1.09    1.84
   2  -4  21   -1.28    1.70
   2   4  21    0.40    1.43
   2  -4  21    3.35    2.68
   2  -4  22    0.59    2.54
  -2  -5  23   -0.24    1.39
  -2   5  23   -0.70    1.67
  -2  -5  22    1.11    1.71
  -2  -5  22   -0.80    4.30
  -2  -5  21    1.00    1.35
  -2   5  21   -1.02    1.41
  -2  -5  21    1.15    2.28
   2  -5 -21    2.15    2.33
  -2  -5  20    5.07    1.32
  -2   5  20    6.97    1.39
  -2  -5  20    0.91    2.60
  -2   5  20    4.54    1.86
   2  -5 -20    2.12    2.16
  -2  -5  19    0.60    1.20
  -2   5  19    0.29    1.64
  -2  -5  19   -1.71    2.22
  -2   5  19    0.81    1.67
   2  -5 -19    1.72    2.57
  -2  -5  18   30.31    2.39
  -2   5  18   28.29    2.37
  -2  -5  18   25.59    2.73
  -2   5  18   31.23    2.82
   2  -5 -18   13.31    5.33
  -2  -5  17   87.98    5.00
  -2   5  17   76.30    4.80
  -2  -5  17   75.71    4.80
  -2   5  17   79.72    4.98
   2  -5 -17   65.62    7.36
  -2  -5  16   -0.32    1.11
  -2   5  16   -0.50    1.67
   2  -5 -16   -1.29    1.85
  -2  -5  16   -0.85    1.27
  -2   5  16    1.00    2.58
   2  -5 -16   -0.17    1.90
  -2  -5  15   20.03    2.35
  -2   5  15   22.01    2.79
   2  -5 -15   15.96    2.57
  -2  -5  15   16.25    2.52
  -2   5  15   20.97    2.69
   2  -5 -15   10.62    2.21
  -2  -5  14   11.63    1.64
  -2   5  14    8.91    1.47
   2  -5 -14    7.98    2.08
  -2  -5  14   11.25    1.62
  -2   5  14    7.68    1.37
   2  -5 -14    8.30    2.21
  -2  -5  13   62.24    3.55
  -2   5  13   52.65    3.26
   2  -5 -13   62.84    5.02
  -2  -5  13   61.01    3.78
  -2   5  13   59.82    3.54
   2  -5 -13   48.26    3.48
   2  -5 -13   50.98    3.53
  -2  -5  12   37.22    3.15
  -2   5  12   31.33    2.91
   2  -5 -12   23.69    2.75
  -2  -5  12   27.60    2.90
  -2   5  12   27.32    2.63
   2  -5 -12   36.20    3.46
   2  -5 -12   36.24    3.57
  -2   5  11    6.15    2.90
  -2  -5  11    4.83    1.39
  -2   5  11    7.05    1.63
   2  -5 -11    5.53    1.38
  -2  -5  11    5.45    1.22
  -2   5  11    4.97    1.11
   2  -5 -11    7.25    1.94
   2  -5 -11    6.08    2.08
  -2  -5  10  244.61    7.52
  -2   5  10  243.74    7.16
  -2  -5  10  253.95    4.92
   2  -5 -10  249.65    6.89
  -2  -5  10  227.54    7.76
  -2   5  10  236.94    8.32
   2  -5 -10  243.56    6.40
  -2  -5   9   67.14    5.03
  -2   5   9   67.87    4.80
   2  -5  -9   83.53    4.53
  -2  -5   9   71.78    3.53
   2  -5  -9   77.58    4.28
   2  -5  -9   84.00    4.27
   2  -5  -9   88.28    4.60
  -2  -5   8    4.00    1.70
  -2   5   8    5.17    2.61
   2  -5  -8    3.66    1.22
  -2  -5   8    5.69    0.99
   2  -5  -8    5.82    1.65
   2  -5  -8    5.62    1.64
   2  -5  -8    4.39    1.38
   2  -5  -8    4.53    1.27
  -2  -5   7   32.45    3.15
  -2   5   7   29.60    3.24
   2  -5  -7   29.55    2.44
  -2  -5   7   30.75    1.99
   2  -5  -7   28.62    2.12
   2  -5  -7   34.93    2.47
   2  -5  -7   37.33    2.89
   2  -5  -7   33.09    2.50
  -2  -5   6   82.45    5.24
  -2   5   6   87.38    5.46
   2  -5  -6   87.05    4.63
   2  -5  -6   74.47    4.39
   2  -5  -6   86.25    4.54
  -2  -5   5    5.88    2.04
   2   5  -5    5.38    2.05
  -2   5   5    5.74    2.29
   2  -5  -5    5.52    1.17
  -2  -5   4   18.36    2.57
   2   5  -4   12.22    2.29
  -2   5   4   15.06    2.21
   2   5  -3   66.95    4.68
  -2   5   3   83.62    5.53
   2   5  -3   83.00    5.47
   2   5  -2    1.87    1.66
  -2   5   2   -0.45    1.61
   2   5  -1   49.50    3.36
   2   5  -1   57.03    3.73
  -2   5   1   59.68    4.03
   2   5   0    1.50    1.81
   2   5   0    0.86    1.77
   2  -5   1   75.09    4.98
   2   5   1   60.75    4.56
   2   5   1   76.96    5.09
   2  -5   2  239.71    9.94
   2   5   2  220.09    9.04
   2  -5   3    1.40    1.61
   2   5   3    1.46    2.00
  -2  -5  -3    2.46    1.13
   2  -5   4  159.27    7.22
   2   5   4  154.57    7.17
   2  -5   4  171.70    6.24
  -2  -5  -4  187.33    7.54
  -2  -5  -4  166.31    7.05
   2  -5   5   18.11    2.29
   2   5   5   19.08    2.33
   2  -5   5   17.45    1.75
  -2  -5  -5   13.61    2.06
   2  -5   5   17.05    1.56
  -2  -5  -5   24.94    2.80
  -2  -5  -5   22.62    2.39
  -2  -5  -5   21.56    2.25
   2  -5   6    0.25    2.50
   2  -5   6   -0.05    1.24
  -2  -5  -6    0.02    1.78
   2  -5   6    0.81    0.82
   2  -5   6    0.72    1.16
  -2  -5  -6    1.02    1.42
  -2  -5  -6   -0.32    1.73
  -2  -5  -6    0.66    1.19
   2  -5   7   13.36    2.21
   2  -5   7    7.26    1.11
   2   5   7    9.48    1.25
  -2  -5  -7   12.53    1.88
   2  -5   7   10.90    1.24
   2  -5   7   11.49    2.32
  -2  -5  -7   12.32    2.33
  -2  -5  -7   14.57    1.80
   2  -5   8    7.31    1.99
   2   5   8    6.63    1.95
   2  -5   8    5.44    1.32
   2   5   8    6.58    1.17
  -2  -5  -8    6.87    1.55
   2  -5   8    7.90    1.24
   2  -5   8    9.87    1.93
  -2  -5  -8    9.23    1.83
   2  -5   9   14.55    2.83
   2   5   9   11.21    3.92
   2  -5   9   18.08    1.76
   2   5   9   15.03    3.87
  -2  -5  -9   15.47    2.00
   2  -5   9   17.58    1.75
   2  -5   9   16.65    2.45
  -2  -5  -9   17.82    2.48
   2  -5  10   -2.51    2.69
   2   5  10    2.04    2.06
   2  -5  10    1.61    1.23
   2   5  10   -0.05    1.37
  -2  -5 -10    4.67    2.07
   2  -5  10    3.16    1.01
   2  -5  10    2.05    1.46
  -2  -5 -10    0.54    1.65
   2  -5  11    6.76    2.67
   2  -5  11   14.36    1.60
   2   5  11   11.70    1.71
  -2  -5 -11   11.97    2.62
   2  -5  11   13.25    1.53
   2  -5  11   11.54    2.04
  -2  -5 -11   13.22    3.53
   2  -5  12    1.82    1.04
   2   5  12    0.68    1.03
  -2  -5 -12    3.29    1.59
   2  -5  12    1.13    1.48
   2   5  12    0.04    1.62
  -2  -5 -12    1.56    1.94
   2  -5  13    6.67    1.21
   2   5  13    6.38    1.30
  -2  -5 -13    6.71    2.36
   2  -5  13    3.81    2.15
   2   5  13    3.21    1.38
  -2  -5 -13   -1.66    1.89
   2  -5  14    1.10    1.13
   2   5  14    2.03    1.15
  -2  -5 -14   -0.56    1.66
   2  -5  14   -0.28    2.20
   2   5  14    3.18    1.75
  -2  -5 -14   -2.08    2.53
   2  -5  15    3.36    1.15
   2   5  15    2.77    1.16
   2  -5  15    3.37    2.08
   2   5  15    0.22    2.02
  -2  -5 -15    0.40    2.54
   2  -5  16    0.44    1.15
   2   5  16    1.24    1.21
   2  -5  16   -0.16    1.67
   2   5  16    2.95    1.72
  -2  -5 -16   -0.22    2.08
   2   5  17    7.00    2.04
   2  -5  17   -0.36    2.05
   2   5  17    2.62    2.01
  -2  -5 -17    0.73    2.65
   2  -5  18   -3.92    1.50
   2   5  18    1.66    1.54
   2  -5  18   -1.35    2.27
  -2  -5 -18    0.02    2.26
   2  -5  19    1.08    1.26
   2   5  19   -1.64    1.68
   2  -5  19    0.01    1.95
   2  -5  20   -0.70    1.74
   2   5  20   -0.42    1.72
   2  -5  20    0.07    2.05
   2  -5  21    3.72    1.59
   2  -5  21    2.02    2.50
   2  -5  22    2.36    1.57
  -2  -6  22    0.31    1.71
  -2   6  22   -0.10    1.58
  -2  -6  21   -0.72    1.82
  -2   6  21    2.36    1.36
  -2  -6  20    2.63    1.57
  -2   6  20    1.93    1.24
  -2  -6  20    1.06    2.30
   2  -6 -20    3.85    2.76
  -2  -6  19    9.77    1.73
  -2  -6  19    2.40    2.45
   2  -6 -19    0.05    2.14
  -2  -6  18   -1.06    1.66
  -2   6  18    5.23    1.81
  -2  -6  18   -0.05    3.15
  -2   6  18    0.94    1.86
   2  -6 -18   -0.93    2.09
  -2  -6  17   -1.44    1.75
  -2   6  17    2.51    1.27
  -2  -6  17   -2.20    2.13
  -2   6  17   -0.20    1.46
   2  -6 -17   -1.91    2.54
  -2  -6  16    1.30    1.13
  -2   6  16   -0.68    1.59
   2  -6 -16   -3.80    2.57
  -2  -6  16    0.15    2.70
  -2   6  16    1.73    1.32
   2  -6 -16    2.93    2.54
  -2  -6  15    4.09    1.16
  -2   6  15    4.62    1.60
   2  -6 -15    4.37    2.54
  -2  -6  15   -0.05    1.58
  -2   6  15    0.98    1.23
   2  -6 -15    0.82    1.88
  -2  -6  14   10.03    1.70
   2  -6 -14    7.78    1.98
  -2   6  14    8.30    1.53
   2  -6 -14    8.25    1.97
  -2  -6  13   35.27    2.58
  -2   6  13   33.26    3.12
   2  -6 -13   28.08    3.64
  -2  -6  13   33.36    3.21
  -2   6  13   32.14    3.00
   2  -6 -13   42.18    4.00
   2  -6 -13   35.54    3.31
  -2  -6  12    3.93    1.27
  -2   6  12    4.69    1.25
   2  -6 -12    1.85    2.32
  -2  -6  12    3.68    1.75
  -2   6  12    3.86    1.47
   2  -6 -12    0.78    2.15
   2  -6 -12    3.32    1.48
  -2  -6  11    2.53    1.33
  -2   6  11    3.17    1.52
   2  -6 -11    0.27    1.33
  -2   6  11    0.66    1.41
   2  -6 -11    5.94    2.20
   2  -6 -11    0.57    1.79
  -2   6  10   18.46    2.81
  -2  -6  10   27.24    2.50
   2  -6 -10   20.82    2.31
  -2   6  10   24.11    2.39
   2  -6 -10   32.31    3.28
   2  -6 -10   27.25    2.78
  -2   6   9   11.36    2.84
   2  -6  -9   14.49    2.30
  -2  -6   9   13.05    1.80
   2  -6  -9   10.26    1.82
   2  -6  -9   14.94    2.27
   2  -6  -9   16.85    2.12
   2  -6  -9   11.39    1.77
  -2  -6   8   -0.58    2.20
  -2   6   8    1.17    1.73
   2  -6  -8    1.42    1.51
  -2  -6   8    0.18    1.02
   2  -6  -8   -0.18    1.55
   2  -6  -8    0.64    1.58
   2  -6  -8   -0.63    1.20
   2  -6  -8    1.18    1.26
  -2  -6   7   61.73    4.52
  -2   6   7   63.57    4.28
   2  -6  -7   66.15    3.57
  -2  -6   7   62.16    3.16
   2  -6  -7   70.96    3.91
   2  -6  -7   80.50    4.33
   2  -6  -7   82.72    4.28
   2  -6  -7   79.05    4.61
  -2  -6   6    2.08    1.55
  -2   6   6   -1.01    2.16
   2  -6  -6    1.33    1.07
  -2  -6   6    1.18    1.16
   2  -6  -6    1.68    1.07
  -2  -6   6    1.27    1.62
   2  -6  -6    2.31    1.08
   2  -6  -6    3.80    1.87
   2  -6  -6    0.23    1.52
  -2  -6   5    7.84    2.30
  -2   6   5    5.37    1.83
   2  -6  -5    7.55    1.73
  -2  -6   5    5.21    0.98
   2  -6  -5    8.15    1.30
  -2  -6   5    6.33    1.12
   2  -6  -5    7.21    1.26
   2  -6  -5    6.60    1.42
  -2   6   4    0.20    1.61
   2   6  -4    1.39    1.78
   2  -6  -4    6.45    1.62
   2  -6  -4    1.81    1.56
  -2  -6   4    2.66    1.32
   2  -6  -4    2.45    1.26
  -2   6   3   70.44    4.74
   2   6  -3   72.03    4.91
   2  -6  -3   70.59    4.22
   2  -6  -3   76.84    4.01
  -2  -6   3   80.87    4.29
   2  -6  -3   77.09    4.18
   2   6  -2   11.27    2.16
  -2   6   2   15.21    2.71
   2  -6  -2   14.09    1.74
  -2  -6   2   12.36    2.40
   2  -6  -2   10.45    1.28
   2   6  -1   -1.35    1.75
  -2   6   1   -0.73    1.51
   2  -6  -1    0.57    1.25
  -2  -6   1    1.09    1.50
   2  -6  -1    0.70    0.87
   2   6   0   10.73    2.28
  -2   6   0   13.04    2.67
   2  -6   0   11.79    1.64
  -2  -6   0   11.63    1.71
   2  -6   0    9.49    1.21
   2  -6   1  159.07    7.26
   2   6   1  161.87    7.34
   2  -6   1  159.74    6.01
  -2  -6  -1  190.40    7.26
   2  -6   1  168.54    6.36
   2  -6   2    0.94    2.25
   2   6   2    2.47    1.52
   2  -6   2    2.93    0.98
  -2  -6  -2    2.75    1.54
   2  -6   2    4.32    1.28
   2  -6   3   59.27    4.50
   2   6   3   53.01    3.93
   2  -6   3   57.71    3.27
  -2  -6  -3   54.80    3.48
   2  -6   3   58.82    3.32
  -2  -6  -3   60.95    4.28
  -2  -6  -3   55.26    3.90
   2  -6   4   37.22    4.10
  -2  -6  -4   37.61    3.15
   2  -6   4   42.42    3.27
  -2  -6  -4   47.67    3.89
   2  -6   4   49.07    3.65
  -2  -6  -4   43.99    3.79
  -2  -6  -4   49.09    4.30
  -2  -6  -4   47.59    4.28
   2  -6   5    0.35    1.72
   2   6   5   -0.22    2.16
  -2  -6  -5   -2.06    1.24
   2  -6   5    0.14    1.04
  -2  -6  -5    0.35    1.60
   2  -6   5    0.03    1.20
   2  -6   5   -0.40    1.41
  -2  -6  -5    1.52    1.82
  -2  -6  -5   -0.77    1.22
  -2  -6  -5    0.06    1.17
   2  -6   6    3.92    1.91
   2   6   6    3.12    2.46
  -2  -6  -6    4.01    1.30
   2  -6   6    5.11    1.35
  -2  -6  -6    4.86    1.81
   2  -6   6    3.38    0.98
   2  -6   6    0.66    1.47
  -2  -6  -6    7.88    2.19
  -2  -6  -6    2.66    1.36
  -2  -6  -6    3.37    1.67
   2  -6   7   -1.58    1.79
   2   6   7    0.13    2.31
   2  -6   7    0.18    0.85
  -2  -6  -7    2.11    3.64
   2  -6   7   -1.13    0.88
   2  -6   7    0.12    1.40
  -2  -6  -7   -1.56    1.53
  -2  -6  -7   -0.28    1.18
   2  -6   8   43.41    4.43
   2   6   8   35.10    3.98
   2  -6   8   38.38    3.16
   2   6   8   35.25    3.15
  -2  -6  -8   40.81    4.30
   2  -6   8   37.79    3.82
  -2  -6  -8   40.19    4.55
   2  -6   9    6.13    3.66
   2   6   9   10.75    3.28
   2  -6   9   16.56    1.71
   2   6   9   11.16    1.71
  -2  -6  -9   14.88    2.42
   2  -6   9   13.86    1.69
  -2  -6  -9   13.56    2.41
   2  -6  10    3.99    1.13
   2   6  10    5.32    1.31
  -2  -6 -10    1.80    2.08
   2  -6  10    6.13    1.47
   2  -6  10    0.94    1.87
  -2  -6 -10    2.43    1.79
   2  -6  11   -0.24    1.46
   2   6  11   -0.71    1.27
  -2  -6 -11    1.05    1.92
   2  -6  11   -0.93    1.65
   2  -6  11    2.27    2.11
  -2  -6 -11   -0.88    2.81
   2  -6  12    1.63    1.14
   2   6  12    0.59    1.37
  -2  -6 -12    2.28    1.65
   2  -6  12    1.67    2.17
  -2  -6 -12   -0.02    1.89
   2  -6  13    1.67    1.35
   2   6  13    2.83    1.11
  -2  -6 -13    3.10    2.34
   2  -6  13    0.71    1.62
  -2  -6 -13    4.69    2.96
   2   6  14    5.42    1.22
  -2  -6 -14    2.78    1.80
   2  -6  14    0.65    2.06
  -2  -6 -14   -1.69    2.12
   2  -6  15   -1.02    1.59
   2   6  15    0.51    1.62
   2  -6  15    1.40    1.74
  -2  -6 -15    3.25    2.16
   2  -6  16    1.63    1.24
   2   6  16    1.46    1.33
   2  -6  16   -0.49    2.49
  -2  -6 -16    1.46    3.04
   2  -6  17    0.81    1.59
   2  -6  17    0.00    1.77
  -2  -6 -17   -0.22    2.80
   2  -6  18    0.17    1.24
   2   6  18   -0.33    1.53
   2  -6  18   -3.05    2.49
  -2  -6 -18    0.19    2.88
   2  -6  19    0.20    1.63
   2   6  19   -0.73    1.78
   2  -6  19   -0.49    2.00
   2  -6  20    6.74    1.70
   2  -6  20    0.25    2.94
  -2   6 -20    2.96    2.27
   2  -6  21   -0.89    1.54
  -2  -7  21   -0.24    1.93
  -2   7  21    0.51    1.77
   2  -7 -21    0.28    3.31
  -2  -7  20    1.40    1.36
   2  -7 -20    2.95    2.79
  -2  -7  19   -1.64    1.55
  -2   7  19    0.46    1.41
   2  -7 -19    1.11    2.22
  -2  -7  18    6.94    1.77
  -2   7  18    2.86    1.29
   2  -7 -18    4.22    3.02
  -2  -7  17    2.88    1.32
  -2   7  17    0.08    1.57
   2  -7 -17    0.81    1.97
  -2  -7  16   31.64    2.49
  -2   7  16   28.42    2.41
   2  -7 -16   24.50    2.85
   2  -7 -16   23.49    4.97
  -2  -7  15    1.76    1.53
  -2   7  15   -1.24    1.54
   2  -7 -15   -1.50    1.92
  -2  -7  14   32.66    2.78
  -2   7  14   42.77    3.52
   2  -7 -14   38.99    3.72
   2  -7 -14   22.37    3.74
  -2  -7  13   30.30    2.67
  -2   7  13   26.86    2.74
   2  -7 -13   30.15    3.17
   2  -7 -13   21.40    3.81
  -2  -7  12   11.19    1.86
  -2   7  12   11.64    1.68
   2  -7 -12   11.68    1.99
   2  -7 -12   18.02    2.70
   2  -7 -12   14.17    2.61
  -2  -7  11   -1.69    1.51
  -2   7  11   -0.65    1.08
   2  -7 -11    0.01    1.39
   2  -7 -11    1.39    1.46
   2  -7 -11    1.06    1.41
  -2  -7  10   -0.46    1.02
   2  -7 -10    1.86    1.81
   2  -7 -10    1.39    1.89
   2  -7  -9   14.92    2.15
  -2  -7   9   11.81    1.73
   2  -7  -9   11.50    1.64
   2  -7  -9   15.85    1.98
   2  -7  -9   10.16    2.11
   2  -7  -9   11.02    1.66
  -2   7   8   42.12    4.41
   2  -7  -8   50.04    4.29
  -2  -7   8   43.57    3.56
   2  -7  -8   39.96    3.85
   2  -7  -8   42.12    3.80
   2  -7  -8   47.67    4.20
   2  -7  -8   49.76    4.33
  -2   7   7    0.11    1.93
   2  -7  -7    1.25    1.55
  -2  -7   7    0.49    0.85
   2  -7  -7    0.40    1.17
  -2  -7   7    0.91    1.20
   2  -7  -7   -0.30    1.41
   2  -7  -7    1.21    1.40
   2  -7  -7   -1.89    1.60
   2  -7  -6   15.77    2.20
  -2  -7   6   15.83    2.26
   2  -7  -6   21.71    2.29
  -2  -7   6   18.43    2.18
   2  -7  -6   19.20    2.27
   2  -7  -6   27.17    3.04
   2  -7  -6   19.77    2.16
  -2   7   5   41.82    3.43
   2  -7  -5   41.82    2.67
  -2  -7   5   40.66    2.42
   2  -7  -5   46.19    2.78
  -2  -7   5   42.86    2.76
   2  -7  -5   45.43    2.79
   2  -7  -5   41.12    2.64
  -2   7   4   34.57    3.48
   2   7  -4   36.17    3.47
   2  -7  -4   43.70    2.88
  -2  -7   4   39.09    2.43
   2  -7  -4   48.34    2.81
  -2  -7   4   38.09    2.65
   2  -7  -4   46.30    4.42
   2  -7  -4   38.38    2.43
  -2   7   3   15.55    2.96
   2   7  -3   16.75    2.58
   2  -7  -3   18.49    2.15
  -2  -7   3   17.44    1.89
  -2  -7   3   19.40    2.12
   2  -7  -3   16.66    1.80
   2  -7  -3   19.07    1.93
   2  -7  -3   17.07    1.92
   2   7  -2   10.50    2.01
  -2   7   2    8.20    2.08
   2  -7  -2   12.85    1.56
  -2  -7   2    9.16    1.29
  -2  -7   2   11.59    1.76
   2  -7  -2   11.06    1.37
   2  -7  -2    9.19    1.28
   2   7  -1   42.53    4.04
  -2   7   1   49.31    4.52
  -2  -7   1   44.57    3.53
   2  -7  -1   56.80    3.31
  -2  -7   1   48.22    3.70
   2  -7  -1   51.06    2.30
   2  -7  -1   51.86    2.55
   2   7   0   36.09    4.09
  -2   7   0   40.70    4.58
  -2  -7   0   42.08    3.56
   2  -7   0   44.51    3.48
  -2  -7   0   40.24    3.20
   2  -7   0   44.21    3.44
   2  -7   0   39.59    3.11
   2   7   1    3.06    1.78
  -2  -7  -1    3.57    1.35
   2  -7   1    1.29    1.03
   2  -7   1    3.07    1.03
   2   7   2   -1.15    2.21
  -2   7  -2    3.33    1.84
  -2  -7  -2    0.40    1.51
   2  -7   2   -0.38    1.32
  -2  -7  -2    2.71    1.20
   2  -7   2    1.10    0.90
  -2  -7  -2    0.87    1.26
  -2  -7  -2    1.29    1.23
   2  -7   3   15.77    2.57
   2   7   3   15.08    2.98
  -2  -7  -3   11.53    1.53
   2  -7   3   17.40    1.88
  -2  -7  -3   19.73    2.31
   2  -7   3   15.52    1.80
  -2  -7  -3   14.85    2.35
  -2  -7  -3   20.19    2.40
  -2  -7  -3   15.22    1.95
   2  -7   4    3.17    2.59
   2   7   4    3.01    2.52
  -2  -7  -4    3.12    1.20
   2  -7   4    4.93    1.06
  -2  -7  -4    3.57    1.40
   2  -7   4    4.90    1.06
  -2  -7  -4    3.94    2.02
  -2  -7  -4    2.78    1.34
  -2  -7  -4    3.93    1.41
   2  -7   5    5.97    2.29
   2   7   5    6.34    2.74
  -2  -7  -5    4.42    1.57
   2  -7   5    7.88    1.19
  -2  -7  -5    5.14    1.46
   2  -7   5    7.35    1.38
  -2  -7  -5    6.23    1.81
  -2  -7  -5    9.89    1.96
  -2  -7  -5    5.92    1.46
   2  -7   6   -0.13    2.23
   2   7   6   -0.09    1.98
  -2  -7  -6   -1.22    1.07
   2  -7   6    1.66    0.96
  -2  -7  -6   -0.24    1.49
   2  -7   6   -0.61    0.95
  -2  -7  -6    4.12    2.23
  -2  -7  -6   -0.38    1.32
  -2  -7  -6   -0.47    1.72
   2  -7   7   12.32    2.87
   2   7   7    8.55    2.45
   2  -7   7   13.60    1.54
   2   7   7    8.11    1.46
  -2  -7  -7   11.73    2.29
   2  -7   7   12.57    1.80
  -2  -7  -7   11.83    2.45
   2  -7   8    2.59    2.90
   2  -7   8    6.18    1.16
   2   7   8    4.83    1.38
  -2  -7  -8    4.80    1.54
   2  -7   8    7.10    1.28
   2  -7   8    3.38    1.54
  -2  -7  -8    9.52    2.51
   2  -7   9    9.83    1.59
   2   7   9    6.02    1.31
  -2  -7  -9    6.56    1.68
   2  -7   9    7.90    1.30
   2  -7   9    2.28    1.58
  -2  -7  -9    6.00    2.02
   2  -7  10   23.54    2.54
   2   7  10   15.61    1.99
  -2  -7 -10   21.32    2.57
   2  -7  10   20.90    2.31
   2  -7  10    9.63    3.76
  -2  -7 -10   12.94    3.14
   2  -7  11   -0.99    1.14
   2   7  11   -0.86    1.37
  -2  -7 -11    2.01    1.57
   2  -7  11    0.39    1.33
   2  -7  11   -0.33    1.80
  -2  -7 -11    1.10    1.97
   2  -7  12    3.59    1.54
   2   7  12    0.80    1.09
  -2  -7 -12    1.23    1.73
   2  -7  12    0.62    2.05
  -2  -7 -12    5.04    2.83
   2  -7  13   21.85    2.88
   2   7  13   19.77    2.62
  -2  -7 -13   20.53    3.27
   2  -7  13   12.98    3.51
  -2  -7 -13   13.93    3.82
   2  -7  14    2.10    1.16
   2   7  14    3.14    1.46
  -2  -7 -14    3.88    1.96
   2  -7  14    2.37    2.08
  -2  -7 -14    0.86    2.38
   2  -7  15   -0.83    1.17
   2   7  15    0.69    1.65
  -2  -7 -15   -2.23    2.29
   2  -7  15    0.91    2.81
  -2  -7 -15   -5.39    2.84
   2  -7  16    3.61    1.30
   2   7  16    3.17    1.32
   2  -7  16    0.46    2.47
  -2  -7 -16    0.06    2.96
   2  -7  17    0.18    1.63
   2   7  17    0.85    1.89
   2  -7  17    4.48    2.45
  -2  -7 -17   -1.21    2.20
   2  -7  18    0.96    1.54
   2  -7  18    0.83    2.86
  -2  -7 -18   -2.02    2.72
   2  -7  19   -0.47    1.46
   2  -7  20    1.09    1.37
   2  -8 -20    0.94    2.71
  -2  -8  19    0.16    1.85
  -2   8  19    0.27    1.71
   2  -8 -19   -3.30    3.22
  -2  -8  18    5.36    1.65
  -2   8  18    3.22    1.58
   2  -8 -18   17.02    3.74
  -2  -8  17    3.61    1.43
   2  -8 -17    2.71    2.72
   2  -8 -17    5.45    2.95
  -2  -8  16    4.00    1.38
  -2   8  16    4.64    1.48
   2  -8 -16    1.67    2.20
   2  -8 -16    3.41    2.13
  -2  -8  15    2.12    1.83
  -2   8  15    8.34    1.90
   2  -8 -15    3.72    2.38
   2  -8 -15    3.24    2.08
  -2  -8  14    0.68    1.30
  -2   8  14    0.63    1.22
   2  -8 -14   -0.36    2.02
   2  -8 -14   -4.13    1.95
  -2  -8  13   -0.61    1.23
  -2   8  13    1.92    1.57
   2  -8 -13    1.87    1.99
   2  -8 -13   -0.09    2.18
  -2  -8  12    7.05    1.48
  -2   8  12    3.88    1.36
   2  -8 -12    5.32    3.58
   2  -8 -12    5.35    2.06
   2  -8 -12    6.88    1.69
  -2  -8  11    1.14    1.51
  -2   8  11   -0.22    1.32
   2  -8 -11    1.62    1.49
   2  -8 -11    2.59    2.19
   2  -8 -11    2.83    2.08
  -2  -8  10    0.34    0.97
  -2   8  10   -0.79    1.54
   2  -8 -10   -1.11    1.94
   2  -8 -10   -0.47    1.52
   2  -8 -10    2.98    1.90
   2  -8  -9    2.67    1.36
  -2  -8   9    0.49    0.94
   2  -8  -9   -1.99    1.88
   2  -8  -9   -1.93    1.45
   2  -8  -9   -5.00    2.03
   2  -8  -9    1.74    1.43
  -2  -8   8    9.58    1.31
   2  -8  -8   10.93    2.12
   2  -8  -8   10.51    2.10
   2  -8  -8   13.22    1.79
   2  -8  -8   11.86    1.72
   2  -8  -7   -2.93    1.54
  -2  -8   7    0.55    0.96
   2  -8  -7    2.09    1.68
   2  -8  -7    0.07    1.76
   2  -8  -7    1.53    2.01
   2  -8  -7    1.59    1.26
   2  -8  -6   -0.32    1.69
  -2  -8   6    1.54    1.04
   2  -8  -6    1.22    1.76
  -2  -8   6   -0.43    1.00
   2  -8  -6   -0.97    1.66
   2  -8  -6    2.24    1.52
   2  -8  -6    2.95    1.26
  -2   8   5    2.00    2.26
   2  -8  -5    6.02    1.97
  -2  -8   5    5.47    1.14
   2  -8  -5    4.41    1.28
  -2  -8   5    6.12    1.36
   2  -8  -5    7.19    1.42
   2  -8  -5    6.12    1.79
   2  -8  -5    7.36    1.41
  -2   8   4    0.80    2.18
   2  -8  -4    3.67    1.71
  -2  -8   4    0.71    0.97
   2  -8  -4    0.68    1.26
  -2  -8   4    0.21    1.42
   2  -8  -4   -1.08    1.21
   2  -8  -4    0.87    1.06
  -2   8   3   -1.10    2.05
   2  -8  -3    1.42    1.34
  -2  -8   3    0.41    1.24
  -2  -8   3   -1.34    1.13
   2  -8  -3    0.90    1.17
   2  -8  -3    0.62    1.13
  -2   8   2   -0.29    2.06
   2  -8  -2    1.67    1.21
  -2  -8   2    1.42    1.14
  -2  -8   2   -0.10    1.10
   2  -8  -2    1.49    1.16
   2  -8  -2    1.25    1.11
   2  -8  -2    0.70    1.39
  -2   8   1   51.17    5.00
  -2  -8   1   53.04    4.42
   2  -8  -1   57.08    4.61
  -2  -8   1   60.62    4.84
   2  -8  -1   60.02    4.67
   2  -8  -1   53.26    4.83
  -2   8   0    2.27    2.31
  -2  -8   0    7.62    1.66
   2  -8   0   10.47    1.42
  -2  -8   0    7.32    1.72
   2  -8   0    5.29    1.25
   2  -8   0    7.79    1.21
  -2   8  -1    0.17    2.08
  -2  -8  -1    2.10    1.41
   2  -8   1   -0.65    1.31
  -2  -8  -1    1.80    1.26
   2  -8   1    1.60    1.44
  -2   8  -2   -4.23    2.79
  -2  -8  -2    1.54    1.86
   2  -8   2    1.61    1.36
  -2  -8  -2    2.31    1.74
   2  -8   2    0.84    1.40
  -2  -8  -2   -0.23    1.39
  -2   8  -3    7.20    2.63
  -2  -8  -3    5.97    1.61
   2  -8   3    8.17    1.23
  -2  -8  -3   11.54    2.02
   2  -8   3    5.96    1.55
  -2  -8  -3    8.71    2.11
  -2  -8  -3   10.81    2.11
  -2  -8  -3   10.80    1.71
  -2   8  -4   -0.48    2.47
  -2  -8  -4    4.23    1.30
   2  -8   4    4.91    1.35
  -2  -8  -4    5.79    1.97
   2  -8   4    4.00    1.17
  -2  -8  -4    6.29    1.76
  -2  -8  -4    6.56    2.12
  -2  -8  -4    4.13    1.65
  -2  -8  -5   15.30    2.27
   2  -8   5   16.90    1.88
  -2  -8  -5   17.47    2.19
   2  -8   5   15.11    1.91
  -2  -8  -5   13.84    3.44
  -2  -8  -5   24.37    2.51
  -2  -8  -5   18.25    2.57
   2  -8   6    0.83    1.43
  -2  -8  -6    2.79    1.44
   2  -8   6    0.26    1.17
  -2  -8  -6   -0.91    1.89
  -2  -8  -6   -0.33    1.85
   2  -8   7    3.65    1.39
   2   8   7    2.86    1.37
  -2  -8  -7    1.57    2.02
   2  -8   7    2.77    1.09
  -2  -8  -7    2.58    2.14
   2  -8   8   19.20    2.49
   2   8   8   13.97    1.98
  -2  -8  -8   22.53    2.93
   2  -8   8   16.48    1.88
  -2  -8  -8   12.64    3.96
   2  -8   9    4.91    1.19
   2   8   9    7.06    1.81
  -2  -8  -9    9.12    2.39
  -2  -8  -9    4.12    2.30
   2  -8  10   47.55    3.34
   2   8  10   37.30    3.11
  -2  -8 -10   39.12    3.65
   2  -8  10   43.80    3.30
  -2  -8 -10   34.93    5.53
   2  -8  11   10.01    1.79
  -2  -8 -11    7.48    1.90
  -2  -8 -11    7.65    2.29
   2  -8  12   46.63    3.04
   2   8  12   42.15    3.29
  -2  -8 -12   38.29    3.43
   2  -8  13    3.29    1.61
   2   8  13    2.09    1.21
  -2  -8 -13    3.77    2.54
  -2  -8 -13    5.30    2.93
   2  -8  14    6.24    1.56
  -2  -8 -14    3.86    1.94
  -2  -8 -14    1.21    2.68
   2  -8  15    1.44    1.62
  -2  -8 -15    3.86    2.48
  -2  -8 -15    1.47    2.31
   2  -8  16    5.96    1.86
  -2  -8 -16    1.02    2.31
   2  -8  17    1.95    1.62
  -2  -8 -17    1.83    2.94
   2  -8  18   -0.72    1.69
  -2   8 -19    1.11    2.01
   2  -9 -19    0.92    2.95
  -2  -9  18    3.52    2.34
   2  -9 -18    2.71    2.93
  -2  -9  17    1.92    1.87
  -2   9  17    2.16    2.11
   2  -9 -17    1.88    3.26
  -2  -9  16   11.50    2.46
  -2   9  16    7.92    2.00
   2  -9 -16    4.20    2.57
   2  -9 -16    0.26    3.28
  -2  -9  15    2.14    1.73
  -2   9  15    2.65    1.45
   2  -9 -15    3.59    2.07
   2  -9 -15   -0.08    2.26
  -2  -9  14   -0.18    1.59
  -2   9  14   -0.85    1.34
   2  -9 -14   -0.39    2.06
  -2  -9  13    2.34    1.78
  -2   9  13    0.73    1.95
   2  -9 -13    1.84    1.70
   2  -9 -13   -0.18    1.98
  -2  -9  12    1.15    1.19
  -2   9  12    1.47    1.27
   2  -9 -12   -2.25    2.42
  -2  -9  11   18.46    2.34
   2  -9 -11   18.23    2.66
   2  -9 -11   13.40    3.00
   2  -9 -11   18.79    2.61
  -2  -9  10   19.06    2.37
  -2   9  10   13.85    1.83
   2  -9 -10   23.86    3.38
   2  -9 -10   12.30    3.09
   2  -9 -10   16.96    2.52
   2  -9  -9    5.16    1.79
  -2  -9   9    6.96    1.65
   2  -9  -9    4.28    2.29
   2  -9  -9    5.74    1.69
   2  -9  -9    7.09    1.64
   2  -9  -8   12.40    2.49
  -2  -9   8    9.26    1.42
   2  -9  -8    9.20    1.82
   2  -9  -8    8.78    2.55
   2  -9  -8    7.15    1.78
   2  -9  -8    8.51    2.00
   2  -9  -7    3.90    1.41
  -2  -9   7    1.67    1.46
   2  -9  -7    2.04    1.53
  -2  -9   7    2.42    1.42
   2  -9  -7    3.46    1.62
   2  -9  -7    3.05    1.68
   2  -9  -7    0.91    1.77
   2  -9  -6    2.33    1.75
  -2  -9   6   -0.95    1.35
   2  -9  -6    0.88    1.47
  -2  -9   6   -0.51    1.25
   2  -9  -6   -3.07    1.99
   2  -9  -6   -0.80    1.57
   2  -9  -6   -1.10    1.41
   2  -9  -5   12.58    1.74
  -2  -9   5   12.78    1.65
   2  -9  -5   15.12    2.40
  -2  -9   5   15.90    2.32
   2  -9  -5   10.24    1.75
   2  -9  -5   14.07    1.95
   2  -9  -5   14.82    2.37
   2  -9  -4    2.99    2.04
  -2  -9   4    1.42    1.66
   2  -9  -4    2.15    1.70
  -2  -9   4    2.77    1.78
   2  -9  -4    0.59    1.52
   2  -9  -4    1.66    1.63
   2  -9  -4    2.68    1.39
   2  -9  -3    3.07    1.48
  -2  -9   3    0.80    1.19
  -2  -9   3   -0.54    1.35
   2  -9  -3    0.69    1.63
   2  -9  -3    2.11    1.83
   2  -9  -2   15.17    3.68
  -2  -9   2   13.21    1.99
  -2  -9   2   14.26    1.98
   2  -9  -2   14.04    2.05
   2  -9  -2   10.91    1.96
  -2  -9   1    0.61    1.65
   2  -9  -1   -1.28    1.76
  -2  -9   1    2.50    1.32
   2  -9  -1    0.58    1.23
   2  -9   0   -1.26    1.64
  -2  -9   0   -2.60    1.30
   2  -9   0    0.55    1.52
   2  -9   1    2.55    1.60
  -2  -9  -1    7.88    2.30
   2  -9   1    6.59    1.86
  -2  -9  -1    7.18    1.77
   2  -9   2   25.02    2.48
  -2  -9  -2   26.22    2.66
   2  -9   2   27.82    2.70
  -2  -9  -2   33.45    3.47
   2  -9   3   -1.62    1.12
  -2  -9  -3    3.26    1.85
   2  -9   3    0.00    1.45
  -2  -9  -3   -0.09    1.51
   2  -9   4   14.90    1.88
  -2  -9  -4   16.12    2.15
   2  -9   4   13.86    1.58
  -2  -9  -4   10.70    3.39
  -2  -9  -4   15.93    2.14
   2  -9   5    0.48    1.09
  -2  -9  -5    3.36    1.53
   2  -9   5   -0.30    1.11
  -2  -9  -5   -0.06    2.71
  -2  -9  -5    2.01    1.97
   2  -9   6    1.33    1.14
  -2  -9  -6    4.23    1.70
   2  -9   6    3.40    1.33
  -2  -9  -6    4.19    2.20
  -2  -9  -6    6.55    2.23
   2  -9   7    8.33    1.41
  -2  -9  -7    6.05    1.64
   2  -9   7    7.23    1.43
  -2  -9  -7    4.80    2.41
   2  -9   8    6.96    1.26
  -2  -9  -8    3.75    2.27
   2  -9   8    9.64    1.72
  -2  -9  -8    2.29    2.00
   2  -9   9   14.89    2.00
  -2  -9  -9   16.35    2.70
   2  -9   9   14.69    2.19
  -2  -9  -9    7.20    3.27
   2  -9  10    2.76    1.23
  -2  -9 -10   -1.41    2.23
   2  -9  10    2.20    1.90
  -2  -9 -10   -0.74    2.20
   2  -9  11    5.57    1.59
  -2  -9 -11   -1.76    2.14
  -2  -9 -11    1.50    2.49
   2  -9  12   -1.32    1.21
  -2  -9 -12    1.40    2.32
  -2  -9 -12    1.00    2.30
   2  -9  13   -1.96    1.46
  -2  -9 -13    0.34    2.53
  -2  -9 -13   -0.78    2.76
   2  -9  14    9.64    2.17
  -2  -9 -14    2.07    2.52
   2  -9  15    5.86    1.65
  -2  -9 -15    3.46    2.09
  -2  -9 -15    1.65    3.09
   2  -9  16    4.51    1.43
  -2  -9 -16    2.88    2.67
   2  -9  17    4.37    1.58
  -2   9 -18    4.95    1.82
   2 -10 -18   -1.45    2.97
   2 -10 -17    5.24    2.98
  -2  10  16    5.81    1.97
   2 -10 -16    7.32    3.30
   2 -10 -16    0.47    2.46
  -2  10  15    0.91    2.09
   2 -10 -15    1.37    2.63
   2 -10 -15    2.26    2.42
  -2  10  14    1.21    1.46
   2 -10 -14    1.55    2.42
   2 -10 -14   -2.07    2.18
  -2  10  13    2.32    1.49
   2 -10 -13    0.57    2.19
   2 -10 -13   -1.28    2.23
  -2 -10  12   10.13    1.97
  -2  10  12    8.85    2.05
   2 -10 -12   10.11    2.12
   2 -10 -12    9.67    3.47
  -2  10  11   -0.95    1.69
   2 -10 -11    0.63    2.17
   2 -10 -11   -3.68    2.53
  -2 -10  10    7.48    1.74
  -2  10  10    5.29    1.73
   2 -10 -10    7.48    2.25
   2 -10 -10    3.58    2.79
  -2 -10   9   -0.68    1.65
  -2  10   9    0.42    1.56
   2 -10  -9    1.77    1.64
   2 -10  -9   -3.09    2.50
   2 -10  -9    0.39    1.53
   2 -10  -8   20.74    2.90
  -2 -10   8   23.08    2.94
   2 -10  -8   22.46    3.13
   2 -10  -8    8.46    3.16
   2 -10  -8   19.29    2.69
   2 -10  -8   19.32    3.01
   2 -10  -7    0.51    1.41
  -2 -10   7   -0.88    1.51
   2 -10  -7    3.09    1.60
  -2 -10   7   -2.05    1.81
   2 -10  -7    2.84    1.72
   2 -10  -7    1.60    1.46
   2 -10  -6   -0.18    1.76
  -2 -10   6   -1.14    1.70
   2 -10  -6    2.39    1.91
  -2 -10   6   -1.27    1.64
   2 -10  -6   -0.12    1.58
   2 -10  -6    0.65    1.48
   2 -10  -5    6.52    1.80
   2 -10  -5    0.18    2.00
  -2 -10   5    3.52    1.91
   2 -10  -5   -1.92    2.12
   2 -10  -5    2.39    2.32
   2 -10  -5    0.49    1.77
   2 -10  -4   -1.08    1.24
   2 -10  -4    1.73    1.50
  -2 -10   4    1.44    1.49
   2 -10  -4   -1.19    1.62
   2 -10  -4    1.75    2.45
   2 -10  -3   11.51    2.01
  -2 -10   3   10.36    1.92
   2 -10  -3   14.78    2.25
   2 -10  -3   14.41    2.90
   2 -10  -3    8.60    1.68
   2 -10  -2   -0.84    1.35
  -2 -10   2   -0.12    1.93
   2 -10  -2   -2.04    1.88
   2 -10  -1    0.35    1.40
  -2 -10   1   -0.16    1.43
   2 -10  -1    0.25    1.77
   2 -10   0   -1.79    1.97
  -2 -10   0    1.08    2.00
   2 -10   0    0.75    1.69
  -2 -10   0    3.57    1.80
   2 -10   1    6.76    1.64
  -2 -10  -1    7.82    2.15
   2 -10   1    3.22    1.90
  -2 -10  -1    9.03    1.92
   2 -10   2   36.11    3.25
  -2 -10  -2   44.17    3.92
   2 -10   2   37.32    3.00
   2 -10   3    3.68    1.63
  -2 -10  -3    2.96    1.59
   2 -10   3   -0.17    1.64
  -2 -10  -3   -0.25    2.09
   2 -10   4   -0.67    1.57
  -2 -10  -4    2.05    2.06
   2 -10   4   -2.42    1.71
  -2 -10  -4    1.99    1.58
   2 -10   5    0.82    1.65
  -2 -10  -5   -0.03    1.64
   2 -10   5   -0.01    1.25
  -2 -10  -5   -2.27    2.09
   2 -10   6   11.14    1.83
  -2 -10  -6   18.86    2.64
   2 -10   6   13.99    2.43
  -2 -10  -6    8.19    3.66
   2 -10   7    9.71    1.80
  -2 -10  -7   14.26    2.45
   2 -10   7   12.78    2.03
  -2 -10  -7   10.37    3.35
   2 -10   8    1.56    1.23
  -2 -10  -8   -0.89    1.79
   2 -10   8   -1.41    1.41
  -2 -10  -8    0.28    3.10
   2 -10   9    2.79    1.32
  -2 -10  -9    4.69    2.36
   2 -10   9   -0.18    1.83
  -2 -10  -9    5.75    2.93
   2 -10  10    0.57    1.27
  -2 -10 -10   -0.93    1.80
  -2 -10 -10   -1.32    2.35
   2 -10  11    5.76    1.69
  -2 -10 -11    2.96    2.37
  -2 -10 -11    2.40    2.58
   2 -10  12   -0.92    1.60
  -2 -10 -12   -1.69    2.27
  -2 -10 -12   -0.29    2.39
   2 -10  13   -1.96    1.41
  -2 -10 -13   -1.25    1.97
  -2 -10 -13   -1.75    2.88
   2 -10  14    0.94    1.90
  -2 -10 -14   -3.03    2.41
   2 -10  15   -0.69    1.82
  -2 -10 -15    1.86    2.47
   2 -11 -15    0.98    3.15
   2 -11 -15    0.28    3.30
   2 -11 -14    0.43    3.34
   2 -11 -13    0.97    2.25
   2 -11 -13    1.58    3.04
  -2  11  12    2.40    1.89
   2 -11 -12    1.46    2.42
   2 -11 -12   -5.54    2.91
  -2  11  11    1.03    1.46
   2 -11 -11    2.78    2.30
   2 -11 -11    0.60    2.78
  -2  11  10   -0.40    1.81
   2 -11 -10   -3.48    2.09
   2 -11 -10   -2.08    3.15
  -2  11   9    3.55    2.14
   2 -11  -9    9.62    2.39
   2 -11  -9    0.24    2.38
  -2  11   8    0.94    1.62
   2 -11  -8   -0.05    2.15
   2 -11  -8    0.27    3.30
   2 -11  -7   -0.83    1.73
   2 -11  -7    0.63    1.62
   2 -11  -7   -0.43    2.09
   2 -11  -6    3.58    1.89
   2 -11  -6    2.15    1.67
  -2 -11   6    0.58    1.88
   2 -11  -6    7.48    1.89
   2 -11  -6    1.13    2.06
   2 -11  -5    3.41    1.85
   2 -11  -5   -2.83    2.31
  -2 -11   5   -0.46    1.49
   2 -11  -5    3.47    2.16
   2 -11  -4    3.66    1.82
  -2 -11   4    3.40    2.00
   2 -11  -4    4.76    2.05
   2 -11  -4    3.49    2.26
   2 -11  -3    2.17    1.88
  -2 -11   3    4.27    1.83
   2 -11  -3    6.58    1.66
   2 -11  -3    1.25    1.76
   2 -11  -2    8.75    1.73
  -2 -11   2   12.18    1.86
   2 -11  -2    7.96    2.82
   2 -11  -2   10.05    2.12
  -2 -11   2   13.02    2.66
   2 -11  -1    1.77    2.07
  -2 -11   1    7.96    1.74
   2 -11  -1    5.22    1.59
  -2 -11   1    6.26    2.20
   2 -11   0    6.96    1.73
  -2 -11   0   10.18    2.36
   2 -11   0    8.66    1.68
  -2 -11   0    8.76    1.87
   2 -11   1   61.43    4.13
  -2 -11  -1   65.68    4.54
   2 -11   1   59.44    4.11
  -2 -11  -1   67.86    4.97
   2 -11   2   -0.57    1.50
  -2 -11  -2    0.70    1.63
   2 -11   2    1.11    1.96
  -2 -11  -2    1.62    2.08
   2 -11   3    4.41    1.63
  -2 -11  -3    4.79    1.74
   2 -11   3    4.52    2.13
  -2 -11  -3    3.69    1.72
   2 -11   4    1.84    2.34
  -2 -11  -4    3.53    2.17
   2 -11   4    2.24    1.89
  -2 -11  -4    4.64    1.73
   2 -11   5    1.12    1.83
  -2 -11  -5    0.92    1.72
   2 -11   5    2.58    2.20
   2 -11   6   -1.22    1.76
  -2 -11  -6   -1.27    2.35
   2 -11   6    0.39    1.86
   2 -11   7   14.50    1.83
  -2 -11  -7   19.28    2.76
   2 -11   7   13.39    2.83
   2 -11   8    3.88    1.75
  -2 -11  -8    1.28    2.35
   2 -11   8    2.23    1.84
   2 -11   9    1.37    1.71
  -2 -11  -9    3.55    2.32
  -2 -11  -9    2.69    3.23
   2 -11  10    1.23    1.52
  -2 -11 -10   -1.04    2.33
  -2 -11 -10   -2.08    3.04
   2 -11  11   -0.22    1.40
  -2 -11 -11    1.00    3.44
   2 -11  12   13.16    2.23
   2 -11  13   -0.06    1.99
  -2 -11 -13    0.98    2.53
  -2  11 -14    1.96    2.22
   2 -12 -11    0.32    2.54
   2 -12 -10    6.92    2.36
   2 -12  -9   -0.46    2.18
  -2 -12   9    1.24    2.40
  -2 -12   8   -1.36    2.36
  -2  12   7    1.17    1.77
   2 -12  -7    0.68    1.90
  -2 -12   7    1.12    2.66
  -2  12   6    1.02    1.65
   2 -12  -6    1.76    2.10
   2 -12  -6   -0.13    1.65
  -2 -12   6    0.28    2.64
   2 -12  -5    1.54    2.28
   2 -12  -5    3.89    2.15
  -2 -12   5    2.34    2.57
   2 -12  -5    0.37    2.19
  -2 -12   5    1.56    2.19
   2 -12  -4    1.58    1.97
  -2 -12   4    2.85    2.31
   2 -12  -4    0.62    2.08
   2 -12  -4    1.65    2.17
  -2 -12   4    4.93    2.40
   2 -12  -3    2.20    1.65
  -2 -12   3    2.00    2.34
   2 -12  -3    3.61    1.68
   2 -12  -3    3.86    2.25
  -2 -12   3   -0.43    2.06
   2 -12  -2    8.11    2.23
  -2 -12   2    7.70    2.06
   2 -12  -2    6.28    1.79
  -2 -12   2    6.68    2.30
   2 -12  -2    9.49    1.94
   2 -12  -1   -1.17    1.53
  -2 -12   1   -1.59    1.72
   2 -12  -1   -0.07    2.08
  -2 -12   1   -0.73    2.35
   2 -12  -1   -2.69    1.99
   2 -12   0    1.01    1.81
  -2 -12   0   -0.93    1.69
   2 -12   0    3.32    1.96
  -2 -12   0   -1.94    1.76
   2 -12   0    0.91    2.21
   2 -12   1   15.12    2.34
  -2 -12  -1   18.33    2.66
   2 -12   1   15.78    2.43
  -2 -12  -1   11.09    2.70
   2 -12   1   24.65    3.08
   2 -12   2    5.25    1.72
  -2 -12  -2    3.81    2.24
   2 -12   2    6.75    2.18
  -2 -12  -2    3.07    1.77
   2 -12   3   -0.69    1.99
  -2 -12  -3   -0.16    1.93
   2 -12   3    1.66    1.65
   2 -12   4   -0.43    2.06
  -2 -12  -4    2.20    2.34
   2 -12   4    0.84    2.33
   2 -12   5    1.28    1.98
  -2 -12  -5    4.72    2.47
   2 -12   5    3.30    2.16
   2 -12   6   -2.31    2.93
  -2 -12  -6    1.54    2.19
   2 -12   6    1.64    1.88
   2 -12   7   12.69    2.98
  -2 -12  -7   -2.30    1.91
   2 -12   8    3.57    2.13
  -2 -12  -8    6.08    2.02
   2 -12   9   13.89    2.39
  -2 -12  -9   10.57    2.58
  -2  12  -9    7.85    2.40
  -2 -12 -10   -1.05    1.97
  -2  12 -10    2.19    2.56
  -2 -12 -11    0.47    2.12
  -2 -12 -12    4.44    3.24
   2 -13 -10    0.09    2.06
   2 -13  -9    5.49    2.29
   2 -13  -8    1.80    2.15
   2 -13  -7    2.12    2.34
   2 -13  -5    2.10    1.85
   2 -13  -4    4.82    2.14
   2 -13  -4    6.95    1.91
  -2 -13   4    3.25    2.13
  -2 -13   3    3.70    4.24
   2 -13  -3    5.97    2.23
   2 -13  -3    2.67    1.84
  -2 -13   3    1.84    2.96
  -2 -13   2   10.39    3.00
   2 -13  -2   13.68    2.33
   2 -13  -2   14.49    3.02
  -2 -13   2   11.86    2.37
  -2 -13   1    0.63    3.30
   2 -13  -1   -1.18    2.21
  -2 -13   1    1.81    2.02
   2 -13  -1   -2.27    1.70
  -2 -13   0    3.24    2.68
   2 -13   0    1.49    2.23
  -2 -13   0    2.79    1.97
   2 -13   0    0.04    1.85
  -2 -13  -1   -3.22    2.48
   2 -13   1    2.86    2.15
   2 -13   1    1.27    1.89
  -2 -13  -2    1.73    2.51
   2 -13   2    2.92    2.27
   2 -13   2    0.80    1.89
  -2 -13  -3   -1.47    2.46
   2 -13   3    0.67    2.15
   2 -13   3    1.91    2.33
  -2 -13  -4    2.55    2.35
   2 -13   4    2.66    2.34
  -2 -13  -5    3.53    2.40
   2 -13   5    3.56    3.02
   2 -13   5    0.47    2.34
  -2 -13  -6   -0.68    2.36
   2 -13   6    1.86    2.81
  -2 -13  -7   -1.13    2.01
  -2 -13  -8    0.41    2.49
  -2 -13  -9    1.61    2.60
   2 -14  -3    6.60    2.70
   2 -14  -2    4.38    2.62
   2 -14  -1    3.02    2.41
   2 -14   0   -1.05    3.44
   2 -14   1    0.78    2.36
  -3   0  25    1.35    2.26
  -3   0  25   -0.17    2.08
  -3   0  24   -1.18    1.44
  -3   0  24   -1.37    1.71
  -3   0  23    3.63    1.36
  -3   0  23    7.99    2.18
  -3   0  22   -1.13    1.27
  -3   0  22   -1.25    1.90
  -3   0  21   26.01    2.39
  -3   0  21   23.74    2.53
  -3   0  20    1.20    1.29
  -3   0  20    1.08    1.55
  -3   0  19   -1.32    1.56
  -3   0  19   -0.93    1.63
  -3   0  18    1.08    1.80
  -3   0  18    0.11    1.29
  -3   0  17    9.82    1.78
  -3   0  17   13.19    2.96
  -3   0  17    4.64    1.46
  -3   0  16   -0.37    1.62
  -3   0  16   -1.02    2.04
  -3   0  16   -1.06    1.18
  -3   0  15    6.07    3.03
  -3   0  15    1.95    1.59
  -3   0  15    2.46    2.09
  -3   0  15    0.48    1.57
  -3   0  14    0.51    2.76
  -3   0  14    1.86    1.46
  -3   0  14   -1.31    3.00
  -3   0  14    1.35    1.20
   3   0 -14    0.87    1.86
  -3   0  13    0.71    1.84
  -3   0  13    0.72    1.34
  -3   0  13    1.39    2.01
  -3   0  13    1.84    1.09
   3   0 -13   -0.08    1.21
  -3   0  12   -0.84    1.60
  -3   0  12   -0.31    0.96
  -3   0  12    1.59    2.62
  -3   0  12   -0.09    1.42
  -3   0  11   66.79    4.78
  -3   0  11   78.55    4.11
  -3   0  11   77.75    5.29
  -3   0  11   75.00    3.89
  -3   0  10   -1.02    1.52
  -3   0   9    3.86    1.70
  -3   0   8   -0.61    2.00
   3   0  -8   -0.39    1.44
  -3   0   7  236.33    9.46
   3   0  -7  219.23    9.35
  -3   0   6   -0.72    1.43
   3   0  -6   -0.08    1.29
  -3   0   5  258.39   10.15
   3   0  -5  285.57   11.15
  -3   0   4   -0.11    1.83
   3   0  -4   -0.08    1.70
  -3   0   3  211.45    8.88
  -3   0   3  230.04    9.34
   3   0  -2    0.34    1.89
  -3   0   2    0.60    1.74
   3   0  -1   35.97    3.07
  -3   0   1   35.79    2.90
   3   0   0    0.62    1.73
  -3   0   0   -0.04    1.56
   3   0   1    0.14    1.89
  -3   0  -1   -0.27    1.76
   3   0   2   -0.04    2.15
  -3   0  -2    0.23    1.38
   3   0   3   24.46    2.94
  -3   0  -3   23.11    2.78
   3   0   4    1.98    2.18
  -3   0  -4   -1.28    2.04
   3   0   5   34.63    2.86
  -3   0  -5   28.26    2.71
   3   0   6    0.31    1.51
   3   0   7    0.62    1.50
   3   0   8   -1.01    1.55
   3   0   9  144.71    6.92
   3   0   9  150.02    5.87
   3   0   9  144.27    6.01
   3   0  10    1.15    2.31
   3   0  10   -1.38    1.25
   3   0  10    0.59    1.12
  -3   0 -10   -0.66    1.49
   3   0  11   46.55    4.02
   3   0  11   51.91    2.67
   3   0  11   56.04    2.93
  -3   0 -11   60.75    5.20
   3   0  12   -1.61    2.61
   3   0  12   -1.81    0.93
   3   0  12    0.11    1.79
  -3   0 -12    1.19    1.66
   3   0  13    4.43    1.15
   3   0  13    4.26    1.85
   3   0  14    0.09    1.11
   3   0  14   -1.77    1.66
   3   0  15   17.75    2.45
   3   0  15   14.95    2.12
   3   0  15   18.12    2.84
   3   0  16    0.69    1.10
   3   0  16    1.01    1.58
   3   0  16   -1.27    1.95
   3   0  17    8.17    1.36
   3   0  17    7.74    1.68
   3   0  18   -1.82    1.39
   3   0  18    0.51    1.54
   3   0  19   16.98    1.79
   3   0  19   19.85    2.28
   3   0  20   -0.04    1.38
   3   0  20   -0.70    2.46
   3   0  21    5.05    1.55
   3   0  21    1.84    2.66
   3   0  22   -1.27    1.56
   3   0  22   -1.86    2.27
   3   0  23   -0.54    2.52
  -3  -1  25    0.05    1.50
  -3   1  25   -2.15    1.44
  -3  -1  25    1.50    2.53
  -3   1  25    0.37    1.81
  -3  -1  24    2.78    1.66
  -3   1  24    3.83    1.32
  -3  -1  24    4.41    2.14
  -3   1  24    4.37    2.11
  -3  -1  23    2.38    1.53
  -3   1  23    2.93    1.60
  -3  -1  23    1.25    1.63
  -3   1  23   -0.38    1.72
  -3  -1  22    0.51    1.59
  -3   1  22   -1.64    1.22
  -3  -1  22   -0.71    1.51
  -3   1  22    0.86    1.51
  -3  -1  21    2.84    1.34
  -3   1  21    5.73    1.62
  -3  -1  21    0.03    2.06
  -3  -1  20    0.11    1.26
  -3   1  20    3.21    1.60
  -3  -1  20    2.71    1.47
  -3   1  20    4.36    1.56
  -3  -1  19   -0.46    1.19
  -3   1  19    0.47    1.28
  -3  -1  19    1.66    1.78
  -3   1  19   -2.33    1.84
  -3  -1  18   -0.36    1.14
  -3   1  18    1.53    1.57
  -3  -1  18    0.91    1.72
  -3   1  18   -0.36    1.27
   3  -1 -18   -0.82    2.23
  -3  -1  17   14.15    1.56
  -3   1  17   12.93    1.98
  -3   1  17   12.33    3.01
  -3  -1  17   12.61    1.96
  -3   1  17   10.80    1.92
   3  -1 -17   10.14    2.51
  -3  -1  16   -1.14    1.38
  -3   1  16    0.17    1.12
  -3  -1  16    0.99    1.93
  -3   1  16   -2.41    1.86
  -3  -1  16   -0.47    1.14
  -3   1  16   -2.33    1.21
   3  -1 -16    1.89    2.14
  -3  -1  15   23.58    3.89
  -3   1  15   20.19    3.31
  -3  -1  15   31.24    2.86
  -3   1  15   31.88    3.04
  -3  -1  15   31.12    3.68
  -3   1  15   31.94    3.99
  -3  -1  15   32.90    3.16
  -3   1  15   27.00    2.87
   3  -1 -15   24.61    3.15
  -3  -1  14    1.30    2.00
  -3   1  14    4.42    2.24
  -3  -1  14    4.15    1.43
  -3   1  14    3.70    1.28
  -3  -1  14    2.39    3.04
  -3   1  14    2.27    2.20
  -3  -1  14    4.85    1.53
  -3   1  14    7.21    1.30
   3  -1 -14    0.98    1.88
  -3  -1  13    6.15    2.07
  -3   1  13    4.69    2.82
  -3  -1  13   10.06    1.55
  -3   1  13    8.00    1.32
  -3  -1  13    6.85    4.00
  -3   1  13    5.84    2.40
  -3  -1  13    8.24    1.71
  -3   1  13    8.70    1.72
   3  -1 -13    6.05    1.38
  -3  -1  12   15.14    2.58
  -3   1  12   19.72    3.09
  -3  -1  12   17.25    1.54
  -3   1  12   14.73    1.78
  -3  -1  12   21.66    3.06
  -3  -1  12   17.64    1.88
  -3   1  12   19.63    1.98
   3  -1 -12   18.50    2.43
  -3  -1  11    3.10    1.59
  -3   1  11    3.50    2.48
  -3  -1  11    1.98    1.01
  -3   1  11    0.04    1.41
  -3  -1  11    2.03    2.00
  -3  -1  11    1.38    1.17
  -3   1  11    1.66    1.05
   3  -1 -11    0.74    1.06
  -3  -1  10    5.45    1.75
  -3   1  10    2.89    2.25
  -3   1  10    5.26    1.23
  -3   1  10    4.66    1.12
  -3  -1   9    6.15    2.13
  -3   1   9    5.34    2.51
  -3  -1   8   -0.06    1.36
  -3   1   8    0.34    2.20
   3   1  -8   -0.33    1.91
  -3  -1   7   13.80    2.01
  -3   1   7   12.76    2.53
   3   1  -7   12.56    2.29
   3  -1  -7   13.63    2.66
  -3  -1   6  153.31    6.30
  -3   1   6  150.79    6.37
   3   1  -6  149.71    6.56
   3  -1  -6  144.60    6.42
  -3  -1   5  833.84   14.67
   3   1  -5  815.84   14.94
  -3   1   5  862.58   15.35
   3  -1  -5  848.70   15.34
  -3  -1   4  408.47    9.76
   3   1  -4  436.61   10.28
  -3   1   4  393.04    9.65
   3  -1  -4  442.08   10.39
  -3   1   3  178.34    7.44
  -3  -1   3  169.29    7.46
   3   1  -3  178.02    8.53
  -3   1   3  180.67    7.44
   3  -1  -2  157.05    6.64
  -3   1   2  157.84    6.52
   3  -1  -1 1320.91   19.73
  -3   1   1 1320.76   19.88
   3   1  -1 1292.12   19.79
  -3  -1   1 1291.68   19.69
   3  -1   0 1147.07   17.54
  -3   1   0 1063.68   17.30
   3   1   0 1126.08   18.17
  -3  -1   0 1089.04   18.13
   3  -1   1  237.43    9.39
  -3   1  -1  258.29   10.11
   3   1   1  251.76   10.00
  -3  -1  -1  244.50   10.03
   3  -1   2  164.03    6.74
  -3   1  -2  156.22    6.53
   3   1   2  167.29    6.90
  -3  -1  -2  165.77    6.97
   3  -1   3    6.92    2.30
  -3   1  -3    6.95    2.19
   3   1   3    5.31    2.31
  -3  -1  -3    5.98    2.15
   3  -1   4   30.44    2.73
  -3   1  -4   41.65    3.34
   3   1   4   51.51    3.40
  -3  -1  -4   37.92    3.32
   3  -1   5    2.87    1.72
   3   1   5    1.34    1.54
  -3   1  -5    1.37    1.53
  -3  -1  -5    2.12    2.04
   3  -1   6   59.30    3.53
   3   1   6   60.24    3.93
   3  -1   7   36.77    3.36
   3   1   7   31.27    2.77
   3  -1   8    1.75    1.66
   3   1   8    0.17    1.51
   3  -1   8    1.49    1.54
   3  -1   9   63.69    4.58
   3   1   9   70.46    4.71
   3  -1   9   71.32    3.85
   3   1   9   71.21    3.97
   3  -1   9   72.41    4.12
   3   1   9   67.53    3.86
  -3  -1  -9   73.13    6.04
   3  -1  10    5.95    2.00
   3   1  10    7.72    1.94
   3  -1  10    6.65    1.40
   3   1  10    3.53    1.29
   3   1  10    6.09    1.34
  -3  -1 -10    8.70    2.38
   3  -1  11   28.85    3.67
   3   1  11   28.42    3.09
   3  -1  11   32.38    2.64
   3   1  11   29.28    2.31
   3  -1  11   30.38    2.89
   3   1  11   31.51    2.60
  -3  -1 -11   38.77    4.44
   3  -1  12    6.67    2.34
   3   1  12    4.27    3.05
   3  -1  12   11.14    1.48
   3   1  12    8.26    1.45
   3  -1  12    9.19    1.34
   3  -1  12   11.93    1.76
   3   1  12   14.25    2.19
  -3  -1 -12   12.12    2.30
   3  -1  13    7.85    1.46
   3   1  13   10.36    1.33
   3  -1  13    6.51    1.32
   3  -1  13    7.07    1.47
   3   1  13    8.68    2.02
  -3  -1 -13   13.23    3.04
   3  -1  14   -1.30    1.42
   3   1  14    0.93    1.41
   3  -1  14    1.80    1.17
   3  -1  14    0.92    1.35
   3   1  14    3.54    1.84
  -3  -1 -14    3.36    1.99
   3  -1  15    6.33    1.66
   3   1  15    3.14    1.14
   3  -1  15    2.39    1.64
   3  -1  15    5.49    1.60
   3   1  15    3.49    1.43
  -3  -1 -15   -0.90    1.91
   3  -1  16    0.56    1.16
   3   1  16    2.56    1.13
   3  -1  16    2.15    1.45
   3   1  16   -1.19    1.38
   3  -1  17    2.17    1.11
   3   1  17    0.05    1.11
   3  -1  17   -2.91    1.93
   3   1  17   -1.78    1.40
   3  -1  18    3.93    1.22
   3   1  18    3.99    1.27
   3  -1  18    7.25    1.74
   3   1  18    2.63    1.94
   3  -1  19   18.92    1.82
   3  -1  19   22.14    2.66
   3   1  19   19.17    2.64
   3  -1  20    0.56    1.15
   3   1  20    0.50    1.33
   3  -1  20   -0.18    2.05
   3   1  20    3.40    1.73
   3   1  21    2.44    1.48
   3  -1  22    3.18    1.44
   3   1  22    2.68    1.47
   3  -1  22   -3.36    2.24
   3  -1  23   -0.31    1.15
   3  -1  23   -0.42    2.04
  -3  -2  25    1.31    1.55
  -3   2  25    1.16    1.50
  -3  -2  25    0.23    2.51
  -3   2  25   -0.26    1.94
  -3  -2  24    0.66    2.51
  -3   2  24    0.49    1.59
  -3  -2  24    3.38    1.89
  -3   2  24    3.39    2.13
  -3  -2  23   -0.37    1.50
  -3   2  23    0.08    1.54
  -3  -2  23    0.91    2.38
  -3   2  23    2.55    2.26
  -3  -2  22   14.43    2.09
  -3   2  22   14.71    1.78
  -3  -2  22   16.05    2.56
  -3   2  22   11.80    1.83
  -3  -2  21    8.93    1.68
  -3   2  21    4.94    1.55
  -3  -2  21    6.77    1.74
  -3   2  21    3.16    1.47
  -3  -2  20   13.06    2.01
  -3   2  20   13.02    1.90
  -3  -2  20   12.38    2.10
  -3   2  20   15.70    2.08
   3  -2 -20    7.51    3.30
  -3  -2  19    3.38    1.72
  -3   2  19    2.62    1.30
  -3  -2  19    3.12    1.94
  -3   2  19    1.37    1.70
   3  -2 -19    6.67    2.73
  -3  -2  18    1.13    1.14
  -3   2  18    0.69    2.13
  -3  -2  18    2.96    1.83
  -3   2  18    0.24    1.72
   3  -2 -18    1.10    2.56
  -3  -2  17    3.14    1.60
  -3   2  17    1.28    1.24
  -3  -2  17   -0.10    1.98
  -3   2  17   -0.68    1.24
   3  -2 -17    4.42    1.82
  -3  -2  16   29.01    2.85
  -3   2  16   30.18    2.54
  -3  -2  16   25.69    2.77
  -3   2  16   26.79    2.90
  -3  -2  16   28.44    2.33
  -3   2  16   26.01    2.31
   3  -2 -16   21.57    3.63
  -3  -2  15    1.78    2.62
  -3  -2  15   -0.87    1.31
  -3   2  15   -0.13    1.43
  -3  -2  15   -0.35    1.90
  -3   2  15    2.73    1.98
  -3  -2  15    1.75    1.30
  -3   2  15    3.72    1.24
   3  -2 -15    2.51    1.52
  -3  -2  14   10.30    2.50
  -3   2  14    7.15    3.08
  -3  -2  14   16.60    2.06
  -3   2  14   16.62    1.93
  -3  -2  14   15.56    2.65
  -3   2  14   21.56    3.40
  -3  -2  14   17.16    2.24
  -3   2  14   13.80    1.73
   3  -2 -14   16.81    2.17
  -3  -2  13    1.28    1.85
  -3   2  13    4.10    2.83
  -3  -2  13    2.49    1.29
  -3  -2  13   -2.69    2.03
  -3   2  13   -0.38    1.90
  -3  -2  13   -0.67    1.04
  -3   2  13    2.57    1.44
   3  -2 -13    0.31    1.73
  -3  -2  12   -1.39    1.59
  -3   2  12   -1.20    2.52
  -3  -2  12    0.72    1.01
  -3   2  12   -0.09    1.07
  -3  -2  12   -0.90    3.02
  -3   2  12   -2.90    1.87
  -3  -2  12    0.69    1.29
  -3   2  12   -0.58    1.33
   3  -2 -12    0.84    1.09
   3  -2 -12   -1.32    1.62
  -3  -2  11   60.30    4.21
  -3   2  11   59.26    4.30
  -3  -2  11   68.90    3.64
  -3   2  11   65.08    3.68
  -3   2  11   55.03    4.36
  -3  -2  11   57.54    3.27
  -3   2  11   59.53    3.36
   3  -2 -11   54.73    3.82
   3  -2 -11   59.27    3.81
  -3  -2  10    8.41    1.76
  -3   2  10   10.73    2.66
  -3  -2  10   11.90    1.30
  -3   2  10    8.57    1.64
  -3  -2  10    9.02    2.03
  -3   2  10    9.14    1.23
   3  -2 -10    6.19    1.31
  -3  -2   9   26.39    2.77
  -3   2   9   23.02    2.56
   3   2  -9   20.22    2.82
  -3  -2   8   -0.73    1.75
  -3   2   8   -0.04    2.31
   3   2  -8    0.72    1.39
  -3  -2   7  210.24    8.74
   3   2  -7  193.85    8.69
  -3   2   7  216.85    9.00
  -3  -2   6  153.78    6.44
   3   2  -6  142.07    6.40
  -3   2   6  153.18    6.48
   3  -2  -6  130.53    6.09
  -3   2   5    0.35    1.40
  -3  -2   5    0.28    1.46
   3   2  -5   -0.19    1.37
  -3   2   5    0.80    1.69
  -3   2   4    1.47    2.05
  -3  -2   4    0.79    1.53
   3   2  -4    0.52    1.44
  -3   2   4   -0.47    2.44
  -3  -2   3 1684.25   23.83
  -3   2   3 1651.43   24.33
   3   2  -3 1767.37   25.79
  -3   2   3 1769.14   24.80
   3  -2  -2  339.89   12.51
  -3   2   2  348.91    8.81
   3   2  -2  347.79    9.43
   3   2  -2  347.09    9.69
   3   2  -1  479.60   11.31
   3  -2  -1  517.27   11.50
  -3   2   1  523.55   11.20
   3   2  -1  500.16   11.15
   3  -2   0  375.35    9.56
  -3   2   0  323.91   12.12
   3   2   0  358.43    9.16
  -3  -2   0  345.39    9.03
   3  -2   1 3727.02   25.80
  -3   2  -1 3663.28   42.49
   3   2   1 3837.48   27.80
  -3  -2  -1 3750.42   29.43
   3  -2   2   64.22    4.41
  -3   2  -2   56.59    3.71
   3   2   2   59.24    3.83
  -3  -2  -2   53.35    3.58
   3  -2   3   76.65    5.13
  -3   2  -3   72.52    4.95
   3   2   3   79.52    5.32
  -3  -2  -3   70.27    4.79
   3  -2   4   29.79    2.69
  -3   2  -4   26.91    2.58
   3   2   4   30.58    2.80
  -3  -2  -4   26.65    2.60
   3  -2   5   85.83    5.31
   3   2   5   81.75    5.24
   3  -2   6   33.62    2.90
   3   2   6   36.45    3.22
   3  -2   7   89.00    5.47
   3   2   7   88.83    5.48
   3  -2   8   12.88    2.16
   3   2   8   13.14    2.59
   3  -2   8   11.25    1.42
  -3  -2  -8    9.69    2.20
   3  -2   8   11.56    1.94
  -3  -2  -8   15.16    2.20
   3  -2   9   13.20    2.19
   3   2   9    4.72    1.80
   3  -2   9    6.70    1.47
   3   2   9    7.53    1.16
  -3  -2  -9    5.46    1.55
   3  -2   9    9.94    1.31
   3  -2   9    7.99    1.80
   3   2   9    8.11    1.57
  -3  -2  -9    9.60    1.99
   3  -2  10   71.86    5.10
   3   2  10   69.97    4.78
   3  -2  10   80.83    3.85
   3   2  10   74.44    6.79
  -3  -2 -10   82.89    5.13
   3  -2  10   74.07    4.15
   3  -2  10   77.62    4.04
   3   2  10   73.56    3.89
  -3  -2 -10   81.53    5.43
   3  -2  11    8.65    2.22
   3   2  11    8.71    2.07
   3  -2  11    6.45    1.51
   3   2  11    7.26    1.63
   3  -2  11    7.85    1.58
   3  -2  11    7.33    1.92
   3   2  11    7.95    1.93
  -3  -2 -11    8.20    2.07
   3  -2  12    6.75    2.42
   3   2  12    7.87    2.24
   3  -2  12   13.36    1.85
   3   2  12   11.71    1.80
   3  -2  12   10.88    1.51
   3  -2  12   11.28    2.02
   3   2  12   11.70    2.02
  -3  -2 -12   12.61    2.94
   3  -2  13   55.40    3.21
   3   2  13   54.61    3.53
   3  -2  13   48.15    3.46
   3  -2  13   64.63    3.89
   3   2  13   55.50    3.75
  -3  -2 -13   42.03    4.53
   3  -2  14   16.83    1.88
   3   2  14   15.57    1.96
   3  -2  14   15.84    2.15
   3  -2  14   24.43    2.84
   3   2  14   19.81    2.41
  -3  -2 -14   12.13    2.29
   3  -2  15    3.82    1.17
   3   2  15    5.54    1.53
   3  -2  15    1.90    1.41
   3   2  15    3.01    1.37
  -3  -2 -15    4.63    2.19
   3  -2  16   -0.34    1.09
   3   2  16    2.77    1.47
   3  -2  16    0.11    1.47
   3   2  16   -0.95    1.65
  -3  -2 -16    3.81    2.27
   3  -2  17   -0.48    1.07
   3   2  17   -0.46    1.12
   3  -2  17    0.06    2.00
   3   2  17    1.66    2.01
   3  -2  18    4.99    1.67
   3   2  18    2.90    1.51
   3  -2  18    3.25    1.83
   3   2  18    6.80    2.46
   3  -2  19    2.30    1.18
   3   2  19   -0.26    1.12
   3  -2  19    2.42    2.18
   3   2  19   -1.19    1.84
   3  -2  20    0.67    1.35
   3   2  20    2.87    1.29
   3  -2  20   -3.29    2.30
   3   2  20   -1.75    2.01
   3  -2  21   -1.66    1.42
   3  -2  21    0.16    2.27
   3   2  21   -3.01    2.22
   3  -2  22    3.09    1.40
   3   2  22   -0.51    1.68
   3  -2  22   -2.09    2.31
   3   2  22   -2.43    3.09
  -3  -3  24    7.43    1.62
  -3   3  24    8.60    1.65
  -3  -3  24    2.48    3.17
  -3   3  24    5.72    2.19
  -3  -3  23    2.48    1.34
  -3   3  23    0.81    1.49
  -3  -3  23   -0.03    2.37
  -3  -3  22   -1.46    1.43
  -3   3  22    0.60    1.52
  -3  -3  22    0.29    2.01
  -3   3  22    0.47    2.02
  -3  -3  21    4.18    1.30
  -3   3  21    5.68    1.72
  -3  -3  21    6.68    2.11
  -3   3  21    8.54    1.59
   3  -3 -21    2.09    3.79
  -3  -3  20    8.64    1.84
  -3   3  20    9.66    1.65
  -3  -3  20    7.80    2.30
  -3   3  20   11.39    1.82
   3  -3 -20    2.51    2.21
  -3  -3  19   10.44    1.47
  -3   3  19   13.02    1.94
  -3  -3  19   10.87    2.03
  -3   3  19   12.49    1.62
  -3  -3  18    4.65    1.58
  -3   3  18   10.50    1.68
  -3  -3  18    8.34    3.09
  -3   3  18    5.98    1.41
   3  -3 -18    5.42    2.64
  -3  -3  17    0.38    1.54
  -3   3  17    1.37    1.66
  -3  -3  17   -0.45    1.24
  -3   3  17    2.05    1.87
   3  -3 -17   -0.55    1.72
  -3  -3  16   14.30    1.70
  -3   3  16   12.58    1.97
  -3   3  16   14.19    2.82
  -3  -3  16   13.27    2.18
  -3   3  16   11.31    1.51
   3  -3 -16   11.78    2.02
  -3  -3  15   14.63    1.77
  -3   3  15   13.55    2.18
  -3  -3  15   15.51    2.92
  -3   3  15   10.09    2.27
  -3  -3  15   10.97    1.63
  -3   3  15   11.03    1.67
   3  -3 -15   10.61    1.91
  -3   3  14    8.49    3.56
  -3  -3  14    8.08    1.53
  -3   3  14    9.89    1.85
  -3  -3  14    9.45    2.54
  -3   3  14    4.14    2.66
  -3  -3  14    8.69    1.79
  -3   3  14   10.53    1.40
   3  -3 -14    8.57    1.63
  -3   3  13    0.49    2.11
  -3  -3  13    1.32    1.26
  -3   3  13   -0.43    1.56
  -3  -3  13    2.41    2.62
  -3   3  13    3.64    2.11
  -3  -3  13    2.61    1.70
  -3   3  13    1.02    1.07
   3  -3 -13    2.28    1.36
   3  -3 -13    0.87    1.63
  -3  -3  12    2.09    1.67
  -3   3  12    1.84    1.97
  -3   3  12    2.13    1.11
  -3  -3  12   -0.57    3.03
  -3   3  12    2.74    2.86
  -3  -3  12    0.47    1.39
  -3   3  12   -0.23    0.89
   3  -3 -12   -0.81    1.56
   3  -3 -12    0.91    1.60
  -3  -3  11   13.19    2.14
  -3   3  11   13.24    2.80
  -3  -3  11   18.04    1.82
  -3   3  11   17.12    1.92
  -3  -3  11   17.97    3.21
  -3   3  11   17.64    2.43
  -3  -3  11   15.24    1.77
  -3   3  11   15.99    1.45
   3  -3 -11   16.98    1.90
   3  -3 -11   15.98    1.75
  -3  -3  10  173.29    7.81
  -3   3  10  182.48    8.38
  -3  -3  10  189.71    6.86
  -3   3  10  178.28    6.74
  -3  -3  10  185.57    8.92
  -3   3  10  162.07    7.54
  -3  -3  10  178.67    6.79
  -3   3  10  167.10    6.56
   3  -3 -10  184.06    6.99
  -3  -3   9  117.21    6.00
  -3   3   9  114.90    6.09
   3  -3  -9  116.46    5.25
   3  -3  -9  115.59    5.36
  -3  -3   8   36.39    3.04
   3   3  -8   25.25    2.95
  -3   3   8   30.84    2.87
  -3  -3   7   24.44    2.52
   3   3  -7   22.91    2.71
  -3   3   7   24.43    2.66
  -3  -3   6  237.02    9.46
   3   3  -6  272.68   11.19
  -3   3   6  286.34   10.95
  -3  -3   5   35.35    2.86
   3   3  -5   37.12    3.00
  -3   3   5   36.86    3.50
  -3   3   4   -0.31    2.03
  -3  -3   4    2.09    1.44
   3   3  -4    1.79    1.51
  -3   3   4    2.53    2.52
  -3   3   3    0.86    2.15
   3   3  -3    2.78    1.25
  -3   3   3    2.58    1.81
   3  -3  -2    0.13    2.33
  -3   3   2    1.66    1.49
   3   3  -2    0.34    1.17
   3   3  -2    0.77    1.29
   3  -3  -1  475.47   10.82
   3   3  -1  477.84   10.78
  -3   3   1  515.61   10.83
   3   3  -1  491.98   10.89
   3   3   0  288.68   11.25
   3  -3   0  291.87   11.10
  -3   3   0  298.81   11.13
   3   3   0  306.99   11.63
   3  -3   1   62.25    4.35
  -3   3  -1   56.79    3.70
   3   3   1   62.23    4.51
  -3  -3  -1   60.15    3.64
   3  -3   2  450.76   10.91
  -3   3  -2  436.32   10.18
   3   3   2  436.56   10.25
  -3  -3  -2  418.06   10.97
   3  -3   3   21.20    2.42
   3   3   3   25.32    2.93
  -3  -3  -3   26.31    3.01
   3  -3   4   40.12    2.97
   3   3   4   38.33    3.30
  -3  -3  -4   29.63    3.17
   3  -3   5    4.11    2.35
   3   3   5    9.85    1.97
   3  -3   6    1.38    1.64
   3   3   6    2.24    1.58
   3  -3   7  185.41    9.90
   3   3   7  179.06    7.87
   3  -3   7  151.78    5.94
  -3  -3  -7  159.86    7.28
   3  -3   7  176.78    7.49
  -3  -3  -7  167.91    7.72
   3  -3   8  146.41    6.80
   3   3   8  164.36    7.44
   3  -3   8  146.31    5.52
   3   3   8  133.90    5.71
  -3  -3  -8  147.81    7.28
   3  -3   8  156.44    6.22
   3  -3   8  162.11    6.82
   3  -3   9    0.18    1.64
   3   3   9    2.73    1.71
   3  -3   9    2.45    1.34
   3   3   9    1.73    0.95
  -3  -3  -9    2.06    1.98
   3  -3   9    2.30    1.12
   3  -3   9    1.70    1.21
   3   3   9    0.99    1.05
  -3  -3  -9    1.19    1.61
   3  -3  10    3.40    1.91
   3   3  10    2.90    1.75
   3  -3  10    1.72    1.22
   3   3  10    1.46    1.44
  -3  -3 -10    0.31    2.08
   3  -3  10    3.33    1.04
   3  -3  10    2.30    1.25
   3   3  10    2.21    1.40
  -3  -3 -10    0.89    1.66
   3  -3  11    3.33    2.83
   3   3  11   -0.66    1.80
   3  -3  11   -0.04    1.34
   3   3  11    1.59    0.99
  -3  -3 -11    1.25    2.18
   3  -3  11    1.97    1.50
   3  -3  11    0.21    1.62
   3   3  11    2.22    1.53
  -3  -3 -11   -0.33    1.75
   3  -3  12    3.73    2.36
   3  -3  12    5.09    1.09
   3   3  12    7.25    1.43
  -3  -3 -12    5.60    2.25
   3  -3  12    5.73    1.17
   3  -3  12    5.58    1.87
   3   3  12    3.26    1.84
  -3  -3 -12    4.33    1.96
   3  -3  13   -0.16    0.98
   3   3  13    0.41    1.27
   3  -3  13    1.15    1.38
   3  -3  13    0.26    1.86
   3   3  13    3.58    1.55
  -3  -3 -13    2.59    2.46
   3  -3  14   37.48    2.34
   3   3  14   33.45    2.86
   3  -3  14   30.55    2.91
   3  -3  14   39.94    2.83
   3   3  14   37.78    2.66
  -3  -3 -14   28.50    4.17
   3  -3  15   20.70    2.22
   3   3  15   20.11    2.27
   3  -3  15   20.77    2.80
   3   3  15   18.28    2.17
  -3  -3 -15   11.69    3.10
   3  -3  16   11.95    2.53
   3   3  16   13.03    1.70
   3  -3  16   11.96    2.06
   3   3  16   12.72    2.19
  -3  -3 -16   11.18    3.68
   3  -3  17   34.09    2.78
   3   3  17   30.05    2.73
   3   3  17   31.08    2.67
  -3  -3 -17   25.87    4.15
   3  -3  18    0.42    1.51
   3  -3  18   -0.73    2.29
   3   3  18    0.07    1.84
   3  -3  19   -2.38    1.17
   3   3  19   -0.09    1.38
   3  -3  19   -0.77    1.94
   3   3  19    0.60    1.55
   3  -3  20    2.16    1.36
   3   3  20    0.69    1.51
   3  -3  20    1.32    1.88
   3   3  20    1.30    1.85
   3  -3  21    7.18    1.64
   3  -3  21   -2.29    2.46
   3   3  21    1.02    2.77
   3  -3  22    0.43    1.65
   3  -3  22    2.13    2.67
  -3  -4  24    2.05    2.02
  -3   4  24   -0.34    1.58
  -3  -4  23    1.22    1.52
  -3   4  23    0.67    1.38
  -3  -4  23    1.64    2.24
  -3   4  23    0.62    2.56
  -3  -4  22    1.29    1.52
  -3   4  22    1.47    1.34
  -3  -4  22    2.27    2.06
  -3   4  22    0.49    1.55
   3  -4 -22   -2.07    3.14
  -3  -4  21    3.75    1.56
  -3   4  21    0.41    1.75
  -3  -4  21    0.81    2.03
  -3   4  21    0.15    1.71
   3  -4 -21   -4.25    2.87
  -3  -4  20    2.05    1.19
  -3   4  20    0.90    1.26
  -3  -4  20    2.01    1.60
  -3   4  20    4.14    1.49
   3  -4 -20    1.33    2.67
  -3  -4  19    4.43    1.54
  -3   4  19    2.62    1.28
  -3  -4  19    6.03    1.67
  -3   4  19    2.88    1.37
   3  -4 -19    2.76    2.89
  -3  -4  18   -1.06    1.51
  -3   4  18   -0.02    1.24
  -3  -4  18   -0.54    1.96
  -3   4  18    1.26    1.22
   3  -4 -18    1.36    1.91
  -3  -4  17    3.14    1.17
  -3   4  17    8.10    1.73
  -3  -4  17    4.27    2.31
  -3   4  17    4.87    1.34
   3  -4 -17    6.12    1.98
  -3  -4  16   46.81    2.98
  -3   4  16   60.02    3.92
  -3  -4  16   49.60    3.30
  -3   4  16   45.04    3.01
   3  -4 -16   39.25    4.00
  -3  -4  15   41.61    2.48
  -3   4  15   40.58    2.86
  -3   4  15   41.03    3.50
  -3  -4  15   44.86    2.85
  -3   4  15   41.10    2.81
   3  -4 -15   40.10    3.55
  -3  -4  14    0.67    1.08
  -3   4  14    1.29    1.19
  -3   4  14   -0.29    2.79
   3  -4 -14   -0.61    1.35
  -3  -4  14   -0.33    1.09
  -3   4  14    0.72    1.48
   3  -4 -14    1.15    1.39
   3  -4 -14   -0.47    1.33
  -3   4  13   73.99    6.70
  -3  -4  13   89.90    6.71
  -3   4  13   84.99    6.50
  -3  -4  13   90.63    7.51
  -3   4  13   78.38    6.72
   3  -4 -13   66.18    6.48
  -3  -4  13   70.55    7.15
  -3   4  13   81.09    6.31
   3  -4 -13   86.50    7.07
   3  -4 -13   94.39    7.31
  -3  -4  12   63.56    6.00
  -3   4  12   65.74    5.87
  -3  -4  12   65.33    4.90
  -3   4  12   76.38    5.85
  -3  -4  12   75.09    6.22
  -3   4  12   63.60    6.16
   3  -4 -12   59.62    5.66
  -3  -4  12   66.88    5.16
  -3   4  12   64.85    5.10
   3  -4 -12   73.22    5.92
   3  -4 -12   80.43    6.46
  -3  -4  11  135.91    6.99
  -3   4  11  144.24    6.87
  -3  -4  11  151.02    5.05
  -3   4  11  155.98    5.57
  -3  -4  11  153.71    7.09
  -3   4  11  130.36    6.53
  -3  -4  11  142.72    5.54
  -3   4  11  141.89    5.13
   3  -4 -11  169.59    6.40
   3  -4 -11  171.74    6.94
  -3  -4  10  106.31    6.00
  -3   4  10  109.99    6.34
  -3  -4  10  104.86    4.63
  -3   4  10  109.30    4.95
  -3  -4  10  107.76    5.99
  -3   4  10   86.67    5.72
   3  -4 -10  108.76    5.65
  -3  -4  10   96.41    5.43
  -3   4  10  101.56    4.79
   3  -4 -10  120.45    5.71
   3  -4 -10  111.81    5.45
  -3  -4   9   32.74    2.91
  -3   4   9   35.85    3.64
   3  -4  -9   35.22    2.71
  -3  -4   9   31.26    1.99
   3  -4  -9   28.51    2.73
  -3   4   9   32.97    2.24
   3  -4  -9   35.06    2.38
   3  -4  -9   36.60    2.68
   3  -4  -9   40.40    2.80
  -3  -4   8   16.60    2.11
   3   4  -8   12.99    2.17
  -3   4   8   17.69    2.41
   3  -4  -8   19.28    1.78
   3  -4  -8   19.93    1.86
   3  -4  -8   20.14    1.68
  -3  -4   7   43.66    3.26
   3   4  -7   34.59    3.14
  -3   4   7   45.78    3.57
   3  -4  -7   38.78    2.18
  -3  -4   6   79.09    5.14
   3   4  -6   71.37    5.13
  -3   4   6   75.17    5.23
  -3  -4   5   -0.80    1.49
   3   4  -5   -0.42    1.33
  -3   4   5    0.02    1.58
  -3  -4   4    0.22    1.44
   3   4  -4    0.68    1.12
  -3   4   4    2.77    1.62
   3   4  -3   53.26    3.25
   3   4  -3   58.40    3.63
  -3   4   3   58.12    3.64
   3   4  -2   24.86    2.24
   3   4  -2   24.82    2.36
  -3   4   2   31.64    3.35
   3  -4  -1   35.85    3.08
   3   4  -1   30.72    2.69
   3   4  -1   26.99    2.68
   3  -4   0   76.03    5.26
   3   4   0   69.73    4.78
   3   4   0   86.61    5.51
   3   4   1   23.27    2.65
   3  -4   1   26.76    2.68
   3   4   1   31.06    2.93
   3  -4   2   72.18    5.01
   3   4   2   61.17    4.53
   3  -4   3   55.04    3.69
   3   4   3   57.98    3.73
   3  -4   4   13.78    2.10
   3   4   4    8.56    2.35
   3  -4   5   26.58    2.54
   3   4   5   27.74    2.96
   3  -4   5   24.61    1.76
  -3  -4  -5   28.51    2.57
   3  -4   6    4.17    1.70
   3   4   6    5.85    1.76
   3  -4   6    3.36    1.16
  -3  -4  -6    5.59    1.78
   3  -4   6    5.08    1.36
   3  -4   6    4.14    1.88
  -3  -4  -6    6.37    1.72
   3  -4   7    1.01    1.83
   3   4   7    0.73    1.53
   3  -4   7    0.73    1.20
  -3  -4  -7    1.20    1.68
   3  -4   7   -0.64    1.21
   3  -4   7    1.52    2.09
  -3  -4  -7    0.57    2.23
   3  -4   8    0.74    2.33
   3   4   8   -1.35    2.12
   3  -4   8   -0.04    0.86
   3   4   8    0.25    1.24
   3  -4   8   14.45    3.73
   3  -4   8    2.34    1.67
  -3  -4  -8   -2.58    2.30
   3  -4   9    0.96    2.51
   3   4   9   -1.90    1.64
   3  -4   9    0.36    0.92
   3   4   9    0.77    0.94
  -3  -4  -9    1.30    1.81
   3  -4   9    0.62    0.89
   3  -4   9    1.66    1.71
   3   4   9    0.22    1.52
  -3  -4  -9   -1.10    2.16
   3  -4  10   14.59    2.62
   3   4  10   12.18    2.48
   3  -4  10   12.31    1.52
   3   4  10   10.41    1.62
  -3  -4 -10   17.69    2.68
   3  -4  10   12.32    1.70
   3  -4  10   10.21    1.60
   3   4  10    9.79    1.45
  -3  -4 -10    9.99    2.77
   3  -4  11    4.47    2.31
   3   4  11    3.20    2.14
   3  -4  11    5.01    1.39
   3   4  11    4.64    1.68
  -3  -4 -11    5.27    2.10
   3  -4  11    2.69    1.29
   3  -4  11    4.63    1.94
   3   4  11    4.92    1.26
  -3  -4 -11    5.67    2.24
   3  -4  12    2.51    1.12
   3   4  12    3.53    1.09
  -3  -4 -12    1.33    1.63
   3  -4  12    3.66    1.11
   3  -4  12    2.21    1.90
   3   4  12    1.98    1.18
  -3  -4 -12    4.98    2.00
   3  -4  13    5.17    1.59
   3   4  13    2.90    1.08
  -3  -4 -13    3.45    1.84
   3  -4  13    5.08    1.31
   3  -4  13    2.24    1.90
   3   4  13    3.39    1.37
  -3  -4 -13    3.77    2.25
   3  -4  14    4.49    1.48
   3   4  14    2.32    1.54
   3  -4  14    9.15    1.88
   3   4  14    3.92    1.61
  -3  -4 -14    3.30    2.98
   3  -4  15   16.88    2.32
   3   4  15   15.02    2.42
   3  -4  15   11.60    2.12
  -3  -4 -15   15.42    3.80
   3  -4  16    2.51    1.17
   3   4  16    2.06    1.19
   3  -4  16    4.75    2.19
   3   4  16    4.92    1.48
  -3  -4 -16    0.03    2.87
   3  -4  17    5.04    1.28
   3   4  17    6.82    1.60
   3  -4  17    4.54    2.37
   3   4  17    8.01    2.14
  -3  -4 -17    5.46    2.30
   3  -4  18   11.79    1.50
   3   4  18   10.15    1.55
   3  -4  18    6.21    2.03
   3   4  18   10.19    1.86
   3  -4  19    1.76    1.53
   3   4  19   -1.04    2.46
   3  -4  19   -2.96    2.63
   3  -4  20    6.30    1.60
   3   4  20    7.84    2.05
   3  -4  20    3.87    2.77
   3  -4  21    0.23    1.44
   3  -4  21   -2.05    1.99
   3  -4  22    1.18    1.40
   3  -4  22    2.11    2.61
  -3  -5  23   -0.93    2.12
  -3   5  23    0.44    1.94
  -3  -5  22    4.76    1.65
  -3   5  22    6.52    1.75
  -3  -5  22   -0.86    2.60
  -3   5  22    6.17    2.50
   3  -5 -22   -0.11    2.81
  -3  -5  21    0.12    1.54
  -3   5  21    2.62    1.64
  -3  -5  21   -1.54    2.64
   3  -5 -21    1.14    2.93
  -3  -5  20    6.19    1.33
  -3   5  20    4.94    1.36
  -3  -5  20   -1.20    1.85
  -3   5  20    5.59    1.80
   3  -5 -20   -0.71    3.55
  -3  -5  19    0.06    1.15
  -3   5  19   -0.34    1.70
  -3  -5  19   -0.32    2.04
  -3   5  19    0.19    1.44
   3  -5 -19   -2.26    1.93
  -3  -5  18   -0.40    1.14
  -3   5  18    2.61    1.28
  -3  -5  18    0.10    2.02
  -3   5  18   -4.61    1.56
   3  -5 -18    2.48    2.00
  -3  -5  17    3.79    1.60
  -3   5  17    5.69    1.39
  -3  -5  17    1.81    1.94
  -3   5  17    6.61    1.41
   3  -5 -17    4.92    1.90
  -3  -5  16   47.42    3.35
  -3   5  16   48.88    3.66
  -3  -5  16   40.22    3.61
  -3   5  16   40.89    3.26
   3  -5 -16   47.00    4.91
  -3  -5  15    0.62    1.01
  -3   5  15   -1.73    1.58
   3  -5 -15    2.53    1.95
  -3  -5  15    0.38    1.22
  -3   5  15   -1.10    1.11
   3  -5 -15    1.77    1.68
  -3  -5  14   17.03    2.07
  -3   5  14   18.76    2.13
   3  -5 -14   13.83    2.55
  -3  -5  14   14.67    2.23
  -3   5  14   16.27    1.88
   3  -5 -14   22.11    2.86
   3  -5 -14    9.94    1.97
  -3  -5  13   18.80    2.02
  -3   5  13   21.42    2.48
  -3   5  13   14.57    4.03
   3  -5 -13   14.60    2.33
  -3  -5  13   21.42    2.51
  -3   5  13   24.59    1.86
   3  -5 -13   25.84    2.15
   3  -5 -13   19.54    2.60
  -3  -5  12    1.02    1.29
  -3   5  12    1.85    1.16
   3  -5 -12    1.96    1.29
  -3  -5  12   -0.17    1.39
  -3   5  12    1.12    1.35
   3  -5 -12    2.86    1.95
   3  -5 -12   -2.69    1.72
  -3   5  11    3.66    2.08
  -3  -5  11    5.88    1.02
  -3   5  11    4.13    1.62
   3  -5 -11    1.54    1.29
  -3  -5  11    2.66    1.13
  -3   5  11    3.99    1.23
   3  -5 -11    4.69    1.37
   3  -5 -11    3.77    1.73
   3  -5 -10   14.01    2.07
  -3  -5  10   15.40    1.59
  -3  -5  10    7.88    1.77
   3  -5 -10   13.03    1.89
  -3   5  10   11.27    1.40
   3  -5 -10   20.02    2.28
   3  -5 -10   17.41    1.96
  -3  -5   9    0.27    1.49
  -3   5   9    0.75    2.36
   3  -5  -9    0.59    1.15
  -3  -5   9    1.37    0.84
   3  -5  -9    0.73    1.41
  -3   5   9   -0.01    0.80
   3  -5  -9   -0.47    1.10
   3  -5  -9    1.98    1.30
   3  -5  -9    0.67    1.24
  -3  -5   8   -0.87    2.04
  -3   5   8   -0.54    2.34
   3  -5  -8   -0.02    1.09
  -3  -5   8    0.86    1.07
   3  -5  -8   -0.14    0.99
  -3   5   8   -0.58    1.17
   3  -5  -8    0.27    1.32
   3  -5  -8   -0.26    1.21
   3  -5  -8   -0.71    1.39
  -3  -5   7   -0.57    1.77
   3  -5  -7    1.10    1.11
   3  -5  -7    1.71    1.00
   3  -5  -7   -0.24    1.93
   3  -5  -7    0.78    1.03
  -3  -5   6    3.48    1.82
  -3   5   6    1.44    2.11
   3  -5  -6    4.47    1.26
   3  -5  -6    4.07    1.48
   3  -5  -6    2.36    1.31
  -3  -5   5   12.64    2.12
   3   5  -5   12.62    2.19
  -3   5   5   16.37    2.29
   3  -5  -5   17.36    1.70
   3  -5  -5   14.31    1.51
   3  -5  -5   14.73    1.38
   3   5  -4   21.64    2.20
  -3   5   4   28.39    2.78
   3   5  -4   26.30    2.66
   3   5  -3   29.33    2.70
   3   5  -3   34.14    2.91
  -3   5   3   36.70    3.09
   3   5  -2   43.64    3.16
   3   5  -2   47.70    3.56
  -3   5   2   49.55    3.83
   3  -5  -1   31.58    3.33
   3   5  -1   27.26    2.46
   3   5  -1   35.45    2.82
   3  -5   0   -0.80    2.32
   3   5   0    0.37    1.19
   3   5   0    1.84    1.80
   3  -5   1   10.62    2.55
   3   5   1   10.80    1.96
   3  -5   2   80.21    5.39
   3   5   2   75.81    5.09
   3  -5   2   73.33    3.87
   3  -5   3  588.19   10.85
   3   5   3  538.31   18.45
   3  -5   3  575.43   17.88
  -3  -5  -3  600.08    8.70
   3  -5   3  547.44   17.50
  -3  -5  -3  592.89    8.92
   3  -5   4   76.25    5.09
   3   5   4   64.00    4.45
   3  -5   4   73.98    3.85
  -3  -5  -4   75.81    4.43
   3  -5   4   74.22    3.87
  -3  -5  -4   84.78    5.52
   3  -5   5   73.58    4.74
   3   5   5   71.74    4.78
   3  -5   5   71.65    3.68
  -3  -5  -5   92.16    5.22
   3  -5   5   73.86    3.95
   3  -5   5   77.54    5.04
  -3  -5  -5   89.06    5.98
  -3  -5  -5   78.25    4.70
   3  -5   6    0.03    1.64
   3   5   6    2.87    2.27
   3  -5   6   -0.60    1.25
  -3  -5  -6    1.04    1.62
   3  -5   6    0.22    1.22
   3  -5   6   -0.55    1.76
  -3  -5  -6   -1.24    1.50
   3  -5   7    0.62    1.70
   3   5   7   -0.56    1.60
   3  -5   7    0.86    1.21
   3   5   7   -0.29    1.56
  -3  -5  -7   -3.26    1.80
   3  -5   7   -1.02    1.12
   3  -5   7    1.05    1.34
  -3  -5  -7   -0.89    2.21
   3  -5   8   17.76    2.75
   3   5   8   19.19    3.03
   3  -5   8   21.55    1.88
   3   5   8   19.36    2.09
  -3  -5  -8   26.02    2.83
   3  -5   8   27.51    2.19
   3  -5   8   19.46    2.55
  -3  -5  -8   15.23    3.08
   3  -5   9    5.17    2.13
   3   5   9    0.48    2.63
   3  -5   9    6.33    1.21
   3   5   9    3.36    1.07
  -3  -5  -9    9.22    2.15
   3  -5   9    4.57    1.16
   3  -5   9    2.13    1.91
  -3  -5  -9    3.73    1.80
   3  -5  10   -2.61    2.24
   3   5  10   -0.01    2.01
   3  -5  10   -0.16    0.91
  -3  -5 -10    0.10    1.96
   3  -5  10    1.56    2.08
   3  -5  10   -0.08    1.43
  -3  -5 -10    1.30    1.78
  -3  -5 -11   -4.09    2.15
   3  -5  11    1.10    1.27
   3  -5  11    1.26    1.40
  -3  -5 -11   -1.34    2.58
   3  -5  12    9.71    1.44
   3   5  12   11.20    1.76
  -3  -5 -12   10.16    2.52
   3  -5  12   10.88    1.36
   3  -5  12    6.25    1.92
  -3  -5 -12    9.88    2.31
   3  -5  13    5.62    1.18
   3   5  13    3.66    1.44
  -3  -5 -13    7.12    1.95
   3  -5  13    9.28    2.25
  -3  -5 -13    6.91    2.90
   3  -5  14    6.02    1.27
   3   5  14    3.79    1.31
  -3  -5 -14    2.90    1.85
   3  -5  14   -0.30    2.23
  -3  -5 -14    5.96    2.34
   3  -5  15    4.81    1.27
   3   5  15    1.53    1.27
   3  -5  15    5.00    1.87
  -3  -5 -15    4.90    2.39
   3  -5  16    3.26    1.65
   3   5  16    2.49    1.13
   3  -5  16   -0.17    2.24
  -3  -5 -16    1.13    2.19
   3  -5  17    7.35    1.42
   3   5  17    5.35    1.51
   3  -5  17    0.59    1.80
  -3  -5 -17    6.87    3.06
   3  -5  18    0.36    1.20
   3   5  18    2.07    1.45
   3  -5  18    0.69    2.50
   3  -5  19   -0.13    2.02
   3   5  19    1.99    2.07
   3  -5  19   -1.15    1.87
   3  -5  20   10.60    1.73
   3  -5  20    3.62    2.93
   3  -5  21    2.00    1.58
   3  -5  21   -0.36    2.92
  -3  -6  22    2.91    1.45
  -3   6  22    2.21    1.47
   3  -6 -22   -1.19    3.12
  -3  -6  21    2.72    1.80
  -3   6  21    1.20    1.49
   3  -6 -21    3.07    2.37
  -3  -6  20    2.63    1.43
  -3   6  20    2.97    1.59
  -3   6  20    1.15    2.15
   3  -6 -20    3.24    2.50
  -3   6  19    4.77    1.45
  -3  -6  19   -0.50    2.28
  -3   6  19    2.35    1.85
   3  -6 -19    2.78    2.61
  -3  -6  18    2.50    1.29
  -3   6  18    1.78    1.76
  -3  -6  18    2.44    2.46
  -3   6  18    2.59    1.90
   3  -6 -18    2.05    2.58
  -3  -6  17   26.33    2.46
  -3   6  17   26.85    2.31
  -3   6  17   25.54    2.31
   3  -6 -17   25.62    4.83
  -3  -6  16   30.70    2.92
  -3   6  16   36.02    3.29
   3  -6 -16   22.03    3.28
  -3  -6  16   13.10    3.74
  -3   6  16   25.59    3.03
   3  -6 -16   26.54    4.23
  -3  -6  15   12.10    1.90
  -3   6  15   12.41    2.20
   3  -6 -15    9.13    1.87
  -3  -6  15   10.76    2.44
  -3   6  15    9.09    1.46
   3  -6 -15    7.51    2.55
  -3  -6  14    7.58    1.41
  -3   6  14    6.74    1.36
   3  -6 -14    4.08    1.55
  -3  -6  14    8.70    2.18
  -3   6  14    4.78    1.52
   3  -6 -14    5.38    1.69
   3  -6 -14   -1.39    1.87
  -3  -6  13   68.15    3.56
  -3   6  13   68.93    3.77
   3  -6 -13   63.90    4.93
  -3   6  13   68.06    3.94
   3  -6 -13   83.94    5.00
   3  -6 -13   72.14    3.95
  -3  -6  12    0.33    0.95
  -3   6  12    1.10    1.19
   3  -6 -12    0.51    1.36
  -3   6  12    0.37    1.31
   3  -6 -12   -1.77    1.76
   3  -6 -12    2.05    1.45
  -3  -6  11    8.16    1.18
  -3   6  11   10.29    1.39
   3  -6 -11    5.74    1.42
  -3   6  11    6.87    1.18
   3  -6 -11   10.76    1.57
   3  -6 -11    6.56    1.58
  -3   6  10    0.94    2.16
   3  -6 -10    1.73    1.70
  -3  -6  10    0.62    0.97
   3  -6 -10    1.05    1.67
  -3   6  10    1.38    1.24
   3  -6 -10    1.88    1.24
   3  -6 -10    3.53    1.83
  -3   6   9    3.19    2.66
   3  -6  -9    5.59    1.70
  -3  -6   9    5.64    1.27
   3  -6  -9    4.46    1.65
  -3   6   9    4.27    1.00
   3  -6  -9    5.12    1.28
   3  -6  -9    6.52    1.92
   3  -6  -9    4.66    1.91
  -3   6   8   14.63    2.30
   3  -6  -8   13.43    1.60
  -3  -6   8   11.80    1.33
   3  -6  -8   10.24    1.74
  -3   6   8    8.55    1.19
   3  -6  -8   13.59    1.80
   3  -6  -8    4.92    1.74
   3  -6  -8   12.44    1.83
  -3   6   7   48.77    4.40
   3  -6  -7   47.03    3.61
  -3  -6   7   43.45    3.37
   3  -6  -7   45.11    3.48
   3  -6  -7   49.04    3.85
   3  -6  -7   55.24    3.28
   3  -6  -7   44.29    3.80
  -3   6   6    4.25    1.83
   3   6  -6    3.99    1.90
   3  -6  -6    4.72    1.35
  -3  -6   6    1.70    1.11
   3  -6  -6    5.12    1.48
   3  -6  -6    2.79    1.53
  -3   6   5    1.19    1.82
   3   6  -5    0.78    1.26
   3  -6  -5   -0.60    1.73
   3  -6  -5   -0.25    1.41
   3  -6  -5    0.75    1.28
  -3   6   4    4.75    1.84
   3   6  -4    5.67    1.92
   3  -6  -4    7.21    1.39
  -3  -6   4    4.20    1.34
   3  -6  -4    7.10    1.20
   3  -6  -4    4.98    1.07
   3   6  -3   11.78    1.89
  -3   6   3   11.98    2.74
   3  -6  -3   11.98    1.46
  -3  -6   3   12.77    1.43
   3  -6  -3   15.08    1.72
   3  -6  -3   12.04    1.27
   3   6  -2   24.57    2.60
  -3   6   2   25.15    2.86
   3  -6  -2   27.29    2.03
  -3  -6   2   26.99    2.23
   3  -6  -2   23.79    1.80
   3  -6  -2   28.08    2.03
   3   6  -1    7.97    2.10
  -3   6   1   12.61    2.25
   3  -6  -1    9.71    1.72
  -3  -6   1    9.49    1.72
   3  -6  -1    7.72    1.16
   3  -6   0  103.52    6.00
   3   6   0  109.64    5.67
   3  -6   0  113.74    4.66
  -3  -6   0  112.38    5.23
   3  -6   0  108.95    3.52
   3  -6   1   53.81    4.05
   3   6   1   44.63    3.60
   3  -6   1   52.96    3.03
  -3  -6  -1   57.51    3.52
   3  -6   1   55.21    3.10
   3  -6   2   13.30    2.83
   3   6   2   13.57    2.09
   3  -6   2   14.10    1.62
  -3  -6  -2   18.09    1.73
   3  -6   2   15.43    1.62
   3  -6   3    2.52    1.83
   3   6   3    4.62    2.22
   3  -6   3    5.00    1.33
  -3  -6  -3    4.56    1.56
   3  -6   3    5.42    1.06
  -3  -6  -3    6.70    1.55
  -3  -6  -3    3.03    1.29
  -3  -6  -3    6.17    1.31
   3  -6   4   25.61    3.56
   3   6   4   32.93    3.73
   3  -6   4   32.71    2.62
   3  -6   4   36.42    2.95
  -3  -6  -4   39.55    4.31
  -3  -6  -4   39.83    3.31
  -3  -6  -4   37.78    3.66
   3  -6   5    2.94    1.93
   3   6   5    2.14    1.67
   3  -6   5    2.46    1.21
  -3  -6  -5    2.83    1.30
   3  -6   5    1.78    0.98
   3  -6   5    3.61    1.32
  -3  -6  -5   -0.53    1.90
  -3  -6  -5    3.19    1.73
   3  -6   6   42.49    3.87
   3   6   6   47.78    4.08
   3  -6   6   57.03    2.64
  -3  -6  -6   51.87    3.15
   3  -6   6   54.97    2.73
   3  -6   6   45.97    4.04
  -3  -6  -6   58.04    5.33
   3  -6   7   -1.31    1.94
   3   6   7    0.21    1.80
   3  -6   7    0.34    0.93
   3   6   7    0.20    0.88
  -3  -6  -7    1.15    1.35
   3  -6   7   -0.23    0.87
   3  -6   7    0.62    1.30
  -3  -6  -7    1.45    2.15
   3  -6   8   13.89    3.91
   3   6   8    4.80    3.04
   3  -6   8   13.79    2.57
   3   6   8    7.47    1.50
  -3  -6  -8   16.25    2.10
   3  -6   8   12.84    1.80
   3  -6   8   12.86    1.96
  -3  -6  -8    7.36    2.23
   3  -6   9    9.10    2.82
   3  -6   9   12.73    1.54
   3   6   9   11.41    1.68
  -3  -6  -9   14.52    2.56
   3  -6   9   11.56    1.72
   3  -6   9   11.77    2.33
  -3  -6  -9    9.99    2.11
   3  -6  10    3.14    1.40
   3   6  10    1.28    1.25
  -3  -6 -10   -1.18    2.16
   3  -6  10    0.80    1.27
   3  -6  10    3.92    2.10
  -3  -6 -10   -1.54    1.85
   3  -6  11    3.99    1.12
   3   6  11    2.78    1.37
  -3  -6 -11    2.12    2.30
   3  -6  11    4.72    1.15
   3  -6  11    0.26    1.56
  -3  -6 -11    5.73    2.11
   3  -6  12   -0.42    1.06
   3   6  12    0.34    1.01
  -3  -6 -12    0.07    2.36
   3  -6  12   -0.74    1.28
   3  -6  12   -0.28    1.56
  -3  -6 -12   -0.35    2.59
   3  -6  13    5.96    1.30
   3   6  13    6.13    1.42
  -3  -6 -13    4.59    2.28
   3  -6  13    8.28    2.36
  -3  -6 -13    7.11    2.51
   3  -6  14    7.73    1.65
   3   6  14    8.68    1.67
  -3  -6 -14    3.66    1.94
   3  -6  14    5.04    2.36
   3  -6  15   -1.14    1.89
   3   6  15    2.61    1.72
   3  -6  15    0.03    2.39
  -3  -6 -15    8.26    3.13
   3  -6  16   -0.14    1.15
   3   6  16    0.84    1.60
   3  -6  16    0.50    1.80
  -3  -6 -16    2.08    2.97
   3  -6  17    3.84    1.62
   3   6  17    1.89    1.89
   3  -6  17    0.69    1.87
  -3  -6 -17    9.28    3.19
   3  -6  18    6.19    1.90
   3  -6  18    1.06    2.33
   3  -6  19    7.07    1.69
   3  -6  19    1.05    2.21
  -3   6 -19    4.17    1.93
   3  -6  20   -0.59    1.39
   3  -6  20    0.62    2.59
  -3  -7  21    1.18    2.09
  -3   7  21   -0.08    1.49
   3  -7 -21   -2.09    3.05
  -3  -7  20    0.23    1.64
  -3   7  20    1.75    1.70
   3  -7 -20    1.60    2.25
  -3   7  19   -0.73    1.89
   3  -7 -19    0.20    2.75
  -3  -7  18    5.22    1.60
  -3   7  18    6.33    1.39
   3  -7 -18    3.15    2.92
  -3  -7  17   42.42    2.77
  -3   7  17   41.21    2.90
   3  -7 -17   29.66    5.89
  -3  -7  16   38.78    2.95
  -3   7  16   40.28    3.08
   3  -7 -16   37.04    4.08
   3  -7 -16   37.90    4.37
  -3  -7  15   38.46    2.85
  -3   7  15   43.78    3.06
   3  -7 -15   39.13    3.41
   3  -7 -15   40.23    5.13
  -3  -7  14   15.72    2.20
  -3   7  14   17.86    2.36
   3  -7 -14   14.91    2.77
   3  -7 -14    9.43    2.41
  -3  -7  13   83.70    5.42
  -3   7  13   72.84    4.86
   3  -7 -13   77.48    5.62
   3  -7 -13   90.67    6.61
   3  -7 -13   60.56    4.51
  -3  -7  12    2.94    1.02
  -3   7  12    2.00    1.19
   3  -7 -12    0.46    1.42
   3  -7 -12    4.37    1.70
   3  -7 -12    3.46    1.91
  -3  -7  11    0.64    1.26
  -3   7  11    1.41    1.17
   3  -7 -11   -0.44    1.28
   3  -7 -11   -0.33    1.41
   3  -7 -11    0.97    1.45
   3  -7 -10    2.55    1.80
   3  -7 -10    8.31    1.56
   3  -7 -10    7.60    1.64
   3  -7 -10    5.14    1.53
   3  -7 -10    5.37    2.00
   3  -7  -9   15.19    2.34
  -3  -7   9   10.15    1.39
   3  -7  -9   14.36    2.15
   3  -7  -9   16.84    2.27
   3  -7  -9   17.28    2.57
   3  -7  -9   16.11    1.98
  -3   7   8    7.70    2.79
   3  -7  -8    2.61    1.59
  -3  -7   8    2.43    0.93
   3  -7  -8    2.22    1.22
   3  -7  -8    5.05    1.58
   3  -7  -8    3.41    1.99
   3  -7  -8    4.77    1.86
  -3   7   7   79.35    6.75
   3  -7  -7   93.66    7.06
  -3  -7   7   75.95    5.71
   3  -7  -7   98.52    7.26
   3  -7  -7  102.87    7.65
   3  -7  -7  110.95    8.27
   3  -7  -7  102.25    7.62
  -3   7   6   21.29    3.58
   3  -7  -6   25.53    2.72
  -3  -7   6   20.24    1.98
   3  -7  -6   27.17    2.64
  -3  -7   6   20.19    2.33
   3  -7  -6   26.91    2.71
   3  -7  -6   35.32    3.37
   3  -7  -6   15.84    2.23
  -3   7   5   28.86    3.24
   3  -7  -5   29.24    2.65
  -3  -7   5   26.27    2.24
  -3  -7   5   28.95    2.49
   3  -7  -5   32.09    2.53
   3  -7  -5   31.04    2.49
   3  -7  -5   29.87    2.61
  -3   7   4   48.90    3.73
   3  -7  -4   50.72    2.79
  -3  -7   4   39.92    2.35
  -3  -7   4   51.41    3.01
   3  -7  -4   51.58    2.98
   3  -7  -4   50.97    2.67
  -3   7   3    4.47    2.67
   3  -7  -3    3.61    1.23
  -3  -7   3    1.70    1.39
   3  -7  -3    2.08    1.10
   3  -7  -3    1.53    1.27
   3   7  -2   -0.30    1.81
  -3   7   2   -0.44    1.73
   3  -7  -2    2.07    1.11
  -3  -7   2   -0.43    1.41
   3  -7  -2   -0.20    1.00
   3  -7  -2   -0.47    0.81
   3   7  -1    0.41    2.42
  -3   7   1    1.80    2.62
   3  -7  -1    1.23    1.06
  -3  -7   1    1.08    1.22
   3  -7  -1    2.02    1.01
   3  -7  -1    2.47    1.21
   3   7   0   11.03    2.14
  -3   7   0   11.59    2.29
   3  -7   0   13.60    1.45
   3  -7   0   13.16    1.36
   3  -7   0   10.58    1.22
   3   7   1   13.88    2.21
  -3   7  -1   16.18    2.62
   3  -7   1   14.31    1.49
  -3  -7  -1   18.70    2.19
   3  -7   1   13.47    1.36
   3  -7   1   11.65    1.40
   3  -7   2   -0.33    1.82
   3   7   2    0.40    1.66
   3  -7   2    0.80    1.36
  -3  -7  -2   -1.74    2.30
   3  -7   2   -0.65    1.19
  -3  -7  -2   -0.54    1.60
  -3  -7  -2    1.07    2.37
   3  -7   2    0.74    0.99
   3  -7   3   -1.89    1.95
   3   7   3    2.42    2.39
   3  -7   3    0.72    0.99
  -3  -7  -3    0.52    1.71
   3  -7   3   -0.94    0.88
  -3  -7  -3    2.14    1.92
  -3  -7  -3    0.10    1.17
  -3  -7  -3   -0.94    1.19
   3  -7   4   43.90    4.47
   3   7   4   47.52    4.72
   3  -7   4   59.90    4.59
  -3  -7  -4   55.70    4.74
   3  -7   4   56.33    4.70
  -3  -7  -4   57.55   10.30
   3  -7   5    7.75    2.40
   3   7   5    8.54    2.78
   3  -7   5    9.64    1.26
  -3  -7  -5    7.27    1.58
   3  -7   5   12.01    1.48
  -3  -7  -5   10.48    1.93
  -3  -7  -5   12.49    2.32
   3  -7   6   15.29    3.76
   3   7   6   10.07    2.50
   3  -7   6   15.47    1.83
  -3  -7  -6   10.99    1.70
   3  -7   6   16.84    1.72
  -3  -7  -6   11.06    2.12
   3  -7   7    9.17    3.70
   3   7   7    4.69    3.47
   3  -7   7    5.09    1.40
  -3  -7  -7    6.72    2.14
   3  -7   7    7.39    2.75
   3  -7   7    1.20    1.99
  -3  -7  -7    6.27    2.28
   3  -7   8    3.95    1.43
   3   7   8    1.05    1.58
  -3  -7  -8    3.02    1.70
   3  -7   8    4.44    1.23
   3  -7   8    0.72    1.57
  -3  -7  -8    2.68    1.93
   3  -7   9   40.46    2.64
   3   7   9   32.74    2.88
  -3  -7  -9   47.44    3.50
   3  -7   9   44.44    2.78
   3  -7   9   24.95    4.89
  -3  -7  -9   37.12    4.31
   3  -7  10   26.18    3.05
   3   7  10   19.77    2.53
  -3  -7 -10   25.21    3.36
   3  -7  10   24.12    2.97
   3  -7  10   12.69    3.72
  -3  -7 -10   21.35    4.91
   3  -7  11   38.18    2.86
   3   7  11   29.89    2.79
  -3  -7 -11   36.33    3.99
   3  -7  11   32.13    2.82
   3  -7  11   20.15    4.23
  -3  -7 -11   25.72    5.33
   3  -7  12   17.75    2.25
   3   7  12   15.17    2.61
  -3  -7 -12   15.47    3.09
   3  -7  12    8.78    5.72
  -3  -7 -12    7.62    2.50
   3  -7  13    7.22    1.37
   3   7  13    4.13    1.43
  -3  -7 -13   11.47    2.55
   3  -7  13    5.69    1.84
  -3  -7 -13    6.30    3.18
  -3  -7 -14    3.81    1.94
   3  -7  14   -0.88    2.42
  -3  -7 -14   -1.71    2.19
   3  -7  15    1.09    1.64
   3  -7  15    0.85    2.48
  -3  -7 -15    1.57    2.90
   3  -7  16    0.22    1.55
   3  -7  16    0.85    2.39
  -3  -7 -16   -5.00    2.32
   3  -7  17    0.94    1.58
   3  -7  17    1.77    3.16
  -3  -7 -17    2.99    2.45
   3  -7  18    2.31    1.70
   3  -7  18    0.24    2.84
   3  -7  19    3.25    1.37
  -3   7 -19    1.92    2.34
   3  -7  20   -0.70    1.55
  -3   8  20   -0.33    2.38
   3  -8 -20    0.51    2.91
  -3  -8  19    3.53    1.60
  -3   8  19    5.61    1.88
   3  -8 -19    5.54    2.90
  -3  -8  18   -0.34    1.60
  -3   8  18   -1.06    1.84
   3  -8 -18    0.01    2.37
  -3  -8  17    6.68    1.95
  -3   8  17    8.92    1.86
   3  -8 -17    2.78    2.63
  -3  -8  16    3.59    1.52
  -3   8  16    6.84    1.64
   3  -8 -16    3.29    1.90
   3  -8 -16   -1.01    2.14
  -3  -8  15    0.42    1.82
  -3   8  15   -3.03    1.72
   3  -8 -15    0.21    1.73
   3  -8 -15    1.15    2.88
  -3  -8  14    1.63    1.50
  -3   8  14   -0.23    1.50
   3  -8 -14    0.48    1.98
   3  -8 -14    1.68    2.49
  -3  -8  13   -0.38    1.26
  -3   8  13    0.06    1.26
   3  -8 -13   -2.63    2.08
   3  -8 -13    1.55    1.97
  -3  -8  12    4.17    1.64
  -3   8  12    5.14    1.60
   3  -8 -12    0.64    1.90
   3  -8 -12    1.65    2.79
   3  -8 -12    4.49    1.62
  -3  -8  11   21.73    2.21
  -3   8  11   20.13    2.17
   3  -8 -11   22.44    2.54
   3  -8 -11   21.79    3.04
   3  -8 -11   25.90    2.69
   3  -8 -10    1.27    1.85
  -3  -8  10    2.74    1.50
   3  -8 -10    2.30    1.96
   3  -8 -10    3.40    1.50
   3  -8 -10    3.15    2.06
   3  -8  -9   25.48    2.72
  -3  -8   9   22.96    2.43
   3  -8  -9   29.93    2.85
   3  -8  -9   31.65    3.12
   3  -8  -9   23.32    2.50
   3  -8  -8   22.78    2.45
  -3  -8   8   20.25    2.03
   3  -8  -8   28.05    2.74
   3  -8  -8   26.78    3.15
   3  -8  -8   31.97    3.05
   3  -8  -8   31.56    2.98
   3  -8  -7   23.19    2.70
  -3  -8   7   21.12    2.33
   3  -8  -7   25.99    2.04
   3  -8  -7   27.17    2.32
   3  -8  -7   22.37    2.82
   3  -8  -7   25.00    1.99
   3  -8  -6    0.66    1.33
  -3  -8   6   -0.23    0.95
   3  -8  -6    0.34    1.23
  -3  -8   6   -0.62    1.50
   3  -8  -6   -0.07    1.15
   3  -8  -6    1.74    1.56
   3  -8  -6    0.48    1.51
   3  -8  -5   48.41    4.12
  -3  -8   5   39.69    3.48
   3  -8  -5   47.97    4.14
  -3  -8   5   49.83    4.41
   3  -8  -5   54.06    4.53
   3  -8  -5   52.67    4.65
  -3   8   4    1.43    3.05
   3  -8  -4    0.47    1.15
  -3  -8   4    2.41    1.41
   3  -8  -4    2.03    1.23
   3  -8  -4    0.78    1.41
   3  -8  -4    4.57    1.56
   3  -8  -3   -1.66    1.68
  -3  -8   3    1.25    1.22
   3  -8  -3   -1.50    1.52
   3  -8  -3    1.53    1.30
   3  -8  -3    0.17    1.25
  -3   8   2    8.68    2.50
   3  -8  -2   11.47    1.53
  -3  -8   2   11.89    1.79
   3  -8  -2   10.19    1.46
   3  -8  -2   10.26    1.74
   3  -8  -2   11.42    1.57
  -3   8   1   37.94    4.29
   3  -8  -1   46.76    4.11
  -3  -8   1   46.10    4.10
   3  -8  -1   55.76    4.60
   3  -8  -1   46.30    3.95
  -3   8   0   52.12    5.61
   3  -8   0   58.15    4.77
  -3  -8   0   66.71    5.61
   3  -8   0   55.11    4.54
   3  -8   0   59.92    4.78
  -3   8  -1   58.02    5.59
   3  -8   1   60.40    4.87
  -3  -8  -1   75.33    6.10
   3  -8   1   68.89    5.39
  -3  -8  -1   89.35    7.21
   3  -8   1   60.83    4.91
  -3   8  -2   14.47    3.60
   3  -8   2   12.42    1.58
  -3  -8  -2   15.25    2.22
   3  -8   2   12.79    1.53
  -3  -8  -2   19.73    2.60
  -3   8  -3    2.95    3.06
   3  -8   3    1.53    1.45
  -3  -8  -3    1.60    1.30
   3  -8   3    2.50    1.08
  -3  -8  -3    1.41    2.19
  -3  -8  -3    2.56    1.93
   3  -8   4    0.18    1.38
  -3  -8  -4    1.45    1.38
   3  -8   4    0.78    1.01
  -3  -8  -4    2.52    2.13
  -3  -8  -4   -1.99    1.92
   3  -8   5   46.87    2.88
  -3  -8  -5   53.98    3.55
   3  -8   5   43.36    2.85
  -3  -8  -5   47.41    6.00
  -3  -8  -5   47.78    7.53
   3  -8   6   30.05    2.79
  -3  -8  -6   26.94    2.85
   3  -8   6   29.94    2.62
  -3  -8  -6   21.23    3.49
   3  -8   7    9.36    1.66
  -3  -8  -7    4.72    2.12
   3  -8   7    7.42    1.67
  -3  -8  -7    9.62    2.10
   3  -8   8   26.26    2.87
  -3  -8  -8   19.67    2.73
   3  -8   8   29.62    3.17
  -3  -8  -8   17.38    4.71
   3  -8   9   10.27    1.63
  -3  -8  -9    9.61    2.27
   3  -8   9   11.64    2.13
  -3  -8  -9   11.00    2.97
   3  -8  10    0.16    1.13
  -3  -8 -10    0.22    1.73
   3  -8  10   -1.44    1.23
  -3  -8 -10    4.15    3.07
   3  -8  11   46.64    3.45
  -3  -8 -11   46.08    4.29
   3  -8  11   42.63    3.00
  -3  -8 -11   25.39    6.50
   3  -8  12    3.15    1.20
  -3  -8 -12   -0.96    2.24
  -3  -8 -12    1.51    3.10
   3  -8  13    0.02    1.61
  -3  -8 -13    3.28    1.97
  -3  -8 -13    1.28    2.33
   3  -8  14    0.71    1.22
  -3  -8 -14    2.59    1.99
  -3  -8 -14    0.75    2.86
   3  -8  15   11.62    1.60
  -3  -8 -15    0.71    2.45
   3  -8  16   -1.78    1.22
  -3  -8 -16    0.43    2.92
   3  -8  17    3.48    1.37
   3  -8  18    2.16    1.56
  -3   8 -18    0.69    1.91
   3  -9 -19   -0.82    2.91
  -3   9  18    2.53    1.86
   3  -9 -18    1.69    2.40
  -3   9  17    0.94    1.83
   3  -9 -17   -2.66    2.68
  -3  -9  16   -0.29    1.80
   3  -9 -16    0.22    2.57
   3  -9 -16   -1.97    4.15
  -3  -9  15    0.32    1.57
  -3   9  15    0.94    2.13
   3  -9 -15    1.77    2.41
   3  -9 -15    2.68    2.94
  -3  -9  14    7.34    2.06
  -3   9  14    3.14    1.44
   3  -9 -14    7.59    2.14
   3  -9 -14   -1.09    2.60
  -3  -9  13   -0.26    1.61
  -3   9  13    0.61    4.82
   3  -9 -13    2.32    1.86
   3  -9 -13   -0.92    2.67
  -3  -9  12   -0.26    1.40
  -3   9  12    1.50    1.83
   3  -9 -12   -0.28    2.17
   3  -9 -12   -1.79    1.81
   3  -9 -12    0.64    2.04
  -3  -9  11    0.13    1.45
  -3   9  11    1.53    1.27
   3  -9 -11    2.21    1.76
   3  -9 -11    1.18    2.31
   3  -9 -11   -3.32    2.08
  -3  -9  10   -0.56    1.09
  -3   9  10    0.25    1.15
   3  -9 -10   -1.01    1.49
   3  -9 -10   -1.51    1.59
   3  -9 -10    0.33    2.17
   3  -9  -9    2.56    1.45
  -3  -9   9    0.33    1.06
   3  -9  -9   -0.44    1.55
   3  -9  -9    2.73    1.80
   3  -9  -9    1.30    1.59
   3  -9  -9   -0.66    1.90
   3  -9  -8    6.37    1.53
  -3  -9   8    4.34    2.53
   3  -9  -8    3.88    1.60
   3  -9  -8    6.07    1.96
   3  -9  -8    5.38    1.70
   3  -9  -8    4.93    2.06
   3  -9  -7    1.24    1.67
   3  -9  -7    2.42    1.44
   3  -9  -7   -0.58    1.39
   3  -9  -7   -1.44    1.47
   3  -9  -7    0.78    1.86
   3  -9  -6   10.90    1.80
   3  -9  -6   12.70    2.24
  -3  -9   6   17.16    2.33
   3  -9  -6   14.53    2.30
   3  -9  -6   20.72    3.12
   3  -9  -6   17.24    2.38
   3  -9  -5   28.41    2.96
  -3  -9   5   23.74    2.74
   3  -9  -5   23.00    2.73
   3  -9  -5   20.51    2.39
   3  -9  -5   31.27    3.13
   3  -9  -5   21.49    2.35
   3  -9  -4    0.54    1.48
  -3  -9   4    2.13    1.59
   3  -9  -4    4.67    1.42
   3  -9  -4    4.16    1.86
   3  -9  -4    3.12    1.75
   3  -9  -3    1.93    1.48
  -3  -9   3   -0.45    1.88
   3  -9  -3    2.96    1.34
   3  -9  -3    1.20    1.80
   3  -9  -3    3.40    1.19
   3  -9  -2    4.92    1.77
  -3  -9   2    3.35    1.52
   3  -9  -2    2.56    1.65
   3  -9  -2    2.21    1.60
   3  -9  -1    8.73    1.80
  -3  -9   1    5.80    1.82
   3  -9  -1    8.91    1.43
   3  -9  -1    6.95    1.70
   3  -9   0    4.63    1.76
  -3  -9   0    7.51    2.37
   3  -9   0    5.29    1.77
  -3  -9   0    3.23    1.67
   3  -9   1   27.36    3.06
  -3  -9  -1   23.69    2.62
   3  -9   1   24.93    2.65
  -3  -9  -1   26.97    3.05
   3  -9   2   17.51    1.99
  -3  -9  -2   18.95    2.29
   3  -9   2   15.72    2.09
   3  -9   3   11.03    1.46
  -3  -9  -3   15.82    2.51
   3  -9   3   13.24    1.60
  -3  -9  -3   15.50    2.13
   3  -9   4    8.54    1.34
  -3  -9  -4    9.71    1.85
   3  -9   4    9.55    1.63
  -3  -9  -4    2.34    2.77
  -3  -9  -4    4.89    2.15
   3  -9   5   44.43    3.05
  -3  -9  -5   41.12    3.42
  -3  -9  -5   35.06    6.16
   3  -9   6    9.89    1.75
  -3  -9  -6   16.26    2.54
   3  -9   6   16.83    2.45
  -3  -9  -6    7.47    3.06
   3  -9   7   10.91    1.76
  -3  -9  -7   15.30    2.72
   3  -9   7   14.39    3.64
  -3  -9  -7   10.36    3.82
   3  -9   8    5.45    1.58
  -3  -9  -8    4.13    1.75
   3  -9   8    4.55    1.66
  -3  -9  -8    3.18    3.02
   3  -9   9   -0.10    1.17
  -3  -9  -9   -1.65    2.15
   3  -9   9    2.06    1.19
  -3  -9  -9   -0.26    2.82
   3  -9  10    1.48    1.61
  -3  -9 -10    3.47    1.82
   3  -9  10    2.05    1.28
  -3  -9 -10    1.19    4.81
   3  -9  11   19.62    1.87
  -3  -9 -11   16.45    2.30
  -3  -9 -11    9.49    3.46
   3  -9  12    0.88    1.20
  -3  -9 -12    6.81    2.09
  -3  -9 -12   -3.99    2.35
   3  -9  13    1.93    1.41
  -3  -9 -13   -2.51    2.59
  -3  -9 -13   -2.68    3.02
   3  -9  14    0.98    1.26
  -3  -9 -14    1.71    2.36
  -3  -9 -14   -0.99    2.41
   3  -9  15    2.62    1.34
  -3  -9 -15   -0.13    2.47
   3  -9  16    0.93    1.85
   3  -9  17    0.16    1.65
  -3   9 -17    0.63    1.98
   3 -10 -18    0.39    2.98
   3 -10 -17    0.22    2.95
  -3  10  16    1.76    1.79
   3 -10 -16   -1.01    2.91
   3 -10 -16    4.63    2.47
  -3  10  15   -0.15    1.88
   3 -10 -15   -0.32    2.62
   3 -10 -15    0.00    3.12
  -3  10  14    2.67    1.77
   3 -10 -14    3.84    1.96
   3 -10 -14    0.63    2.85
  -3  10  13    2.83    1.96
   3 -10 -13    4.25    2.22
   3 -10 -13    1.23    2.06
  -3  10  12   -0.39    1.38
   3 -10 -12    0.09    2.87
   3 -10 -12   -0.74    2.46
  -3  10  11   13.07    2.42
   3 -10 -11   17.28    2.23
   3 -10 -11   10.00    3.05
   3 -10 -10   -0.28    1.64
   3 -10 -10   -0.95    1.86
   3 -10 -10    1.72    1.63
   3 -10  -9    1.32    1.55
   3 -10  -9   -1.76    1.76
   3 -10  -9    0.62    2.19
   3 -10  -8    9.40    2.01
   3 -10  -8    6.51    2.31
   3 -10  -8    2.41    2.01
   3 -10  -8   10.56    1.92
   3 -10  -8    7.89    2.06
   3 -10  -7    3.02    1.41
   3 -10  -7    7.99    2.17
   3 -10  -7    5.13    1.78
   3 -10  -7    1.25    1.71
   3 -10  -6   -1.66    1.26
  -3 -10   6   -1.17    1.38
   3 -10  -6    1.18    1.52
   3 -10  -6    0.44    2.16
   3 -10  -6    1.35    1.74
   3 -10  -6    2.30    1.49
   3 -10  -5    9.26    1.94
  -3 -10   5    5.13    1.55
   3 -10  -5    7.65    1.95
   3 -10  -5    6.16    2.29
   3 -10  -5    1.58    2.56
   3 -10  -5    7.21    2.09
   3 -10  -4   -2.34    1.78
  -3 -10   4   -0.62    2.03
   3 -10  -4    2.89    1.48
   3 -10  -4   -0.39    1.80
   3 -10  -4   -1.64    1.67
   3 -10  -3   -0.22    1.81
  -3 -10   3    1.95    1.93
   3 -10  -3    3.55    1.41
   3 -10  -3   -1.81    1.76
   3 -10  -2   27.76    2.74
  -3 -10   2   21.97    2.87
   3 -10  -2   25.95    2.79
   3 -10  -1    9.13    1.81
  -3 -10   1   13.01    2.14
   3 -10  -1    8.50    2.04
  -3 -10   1   16.37    2.91
   3 -10   0   32.37    2.99
  -3 -10   0   32.62    3.45
   3 -10   0   34.08    3.08
  -3 -10   0   46.58    3.90
   3 -10   1    3.44    1.84
  -3 -10  -1   -2.59    2.43
   3 -10   1   -3.15    1.64
  -3 -10  -1   -2.03    1.83
   3 -10   2    4.37    1.84
  -3 -10  -2    0.69    2.11
   3 -10   2    5.60    1.46
  -3 -10  -2    7.70    1.67
   3 -10   3    2.60    1.59
  -3 -10  -3    4.34    1.65
   3 -10   3    4.67    1.37
  -3 -10  -3    2.42    1.56
   3 -10   4    1.56    1.23
  -3 -10  -4    1.35    1.80
   3 -10   4    2.28    1.24
  -3 -10  -4   -2.04    2.16
   3 -10   5    1.57    1.26
  -3 -10  -5    4.56    1.78
   3 -10   5   -0.67    1.27
   3 -10   6    1.90    1.27
  -3 -10  -6    5.26    3.67
   3 -10   6    1.60    1.35
  -3 -10  -6    0.40    3.41
   3 -10   7   -0.06    1.53
  -3 -10  -7    3.77    2.36
   3 -10   7    2.49    1.41
  -3 -10  -7   -3.54    2.76
   3 -10   8   -0.45    1.30
  -3 -10  -8    5.80    2.96
   3 -10   8    1.77    1.75
   3 -10   9   18.71    1.88
  -3 -10  -9   23.40    2.63
   3 -10   9   19.36    2.54
  -3 -10  -9    6.41    3.05
   3 -10  10    3.28    1.60
  -3 -10 -10    2.35    2.33
  -3 -10 -10    1.25    3.19
   3 -10  11    0.28    1.29
  -3 -10 -11    0.34    2.98
  -3 -10 -11    2.45    2.70
   3 -10  12   -0.06    1.22
  -3 -10 -12   -0.34    1.92
  -3 -10 -12    2.29    2.45
   3 -10  13    8.62    1.93
  -3 -10 -13    6.61    2.69
  -3 -10 -13   -0.61    4.26
   3 -10  14    0.20    1.66
  -3  10 -15    1.34    1.65
  -3  10 -16    0.44    2.06
   3 -11 -15   -0.41    5.04
  -3  11  14    0.86    2.29
   3 -11 -14   -0.36    2.28
   3 -11 -14    0.09    3.12
  -3  11  13    1.62    1.75
   3 -11 -13    1.87    2.46
   3 -11 -13   -0.83    2.98
  -3  11  12    0.76    1.45
   3 -11 -12    0.48    2.22
  -3  11  11    0.87    2.11
   3 -11 -11    2.28    1.76
   3 -11 -11   -2.80    2.20
  -3  11  10    1.08    1.88
   3 -11 -10    3.82    2.09
   3 -11 -10    1.53    2.45
  -3  11   9    1.62    2.03
   3 -11  -9   -0.04    1.70
   3 -11  -9    3.52    2.79
   3 -11  -8    3.53    1.69
   3 -11  -8   -0.24    3.41
   3 -11  -8    2.82    2.13
   3 -11  -7   -0.94    1.48
   3 -11  -7   -4.16    2.17
   3 -11  -7   -3.55    2.39
   3 -11  -7   -0.64    1.57
   3 -11  -7    4.15    1.90
   3 -11  -6    2.15    1.75
   3 -11  -6    0.95    2.22
   3 -11  -6    2.92    2.19
   3 -11  -5    6.19    1.81
  -3 -11   5    5.25    2.24
   3 -11  -5    6.17    2.11
   3 -11  -5    7.35    1.81
   3 -11  -5    7.90    2.05
   3 -11  -4    2.54    1.60
  -3 -11   4   -0.47    2.03
   3 -11  -4   -1.93    1.60
   3 -11  -4    4.49    2.52
  -3 -11   4    1.00    1.98
   3 -11  -3   36.64    3.21
  -3 -11   3   39.55    3.28
   3 -11  -3   35.83    3.62
   3 -11  -3   34.31    3.88
  -3 -11   3   41.41    3.33
   3 -11  -2    2.84    1.45
  -3 -11   2    1.93    1.62
   3 -11  -2    3.55    1.92
  -3 -11   2   -1.14    2.74
   3 -11  -2    1.89    2.37
   3 -11  -1   11.95    2.04
  -3 -11   1   10.02    1.89
   3 -11  -1   13.01    2.35
  -3 -11   1    8.74    1.86
   3 -11   0   30.51    3.02
  -3 -11   0   34.44    4.05
   3 -11   0   40.85    3.25
  -3 -11   0   38.24    3.46
   3 -11   1    6.45    1.58
  -3 -11  -1    6.78    1.80
   3 -11   1    6.67    1.61
  -3 -11  -1    7.24    2.23
   3 -11   2   12.75    2.39
  -3 -11  -2   12.91    2.21
   3 -11   2   11.55    1.71
  -3 -11  -2    5.55    2.04
   3 -11   3    0.98    1.47
  -3 -11  -3   -0.44    1.70
   3 -11   3    0.71    1.50
  -3 -11  -3   -1.48    1.98
   3 -11   4   -0.10    1.75
  -3 -11  -4    1.50    1.86
   3 -11   4    1.10    1.48
   3 -11   5    4.09    1.74
  -3 -11  -5   -0.55    2.45
   3 -11   5   -0.54    1.52
   3 -11   6    8.55    1.62
  -3 -11  -6    9.80    2.68
   3 -11   6    8.85    1.77
   3 -11   7   -0.17    1.92
  -3 -11  -7   -1.69    1.77
   3 -11   7   -0.16    1.97
   3 -11   8    2.06    1.67
  -3 -11  -8    2.76    1.99
   3 -11   8    3.47    2.08
   3 -11   9    7.82    2.22
  -3 -11  -9    5.04    2.06
   3 -11  10    2.58    1.70
  -3 -11 -10    3.09    2.34
  -3 -11 -10   -2.25    3.77
   3 -11  11    3.37    1.95
  -3 -11 -11    0.34    3.39
   3 -11  12   -1.20    2.01
  -3 -11 -12   -1.99    3.40
   3 -11  13   12.09    2.19
  -3 -11 -13    7.00    2.38
  -3  11 -13    9.19    3.48
  -3  11 -14    2.58    2.12
   3 -12 -12    1.61    2.34
   3 -12 -11   -0.64    1.85
  -3  12  10    3.81    2.25
   3 -12 -10    6.37    1.91
  -3  12   9    2.58    1.74
   3 -12  -9   -1.85    2.68
  -3  12   8    3.48    2.55
   3 -12  -8    4.64    2.01
  -3  12   7   -0.96    2.01
   3 -12  -7    0.87    1.73
  -3 -12   7   -0.37    2.70
   3 -12  -6   -2.89    2.14
   3 -12  -6   -3.82    1.62
  -3 -12   6   -1.20    2.26
   3 -12  -5   -1.21    2.28
   3 -12  -5    0.96    2.21
   3 -12  -5    3.68    1.95
  -3 -12   5    3.61    2.34
   3 -12  -4    9.25    2.15
  -3 -12   4   11.61    2.68
   3 -12  -4   11.91    1.92
   3 -12  -4   14.14    2.23
  -3 -12   4   10.21    2.16
   3 -12  -3    1.10    1.94
  -3 -12   3   -2.12    2.17
   3 -12  -3   -1.28    2.05
  -3 -12   3   -0.52    2.29
   3 -12  -3   -0.74    1.73
   3 -12  -2    1.04    1.60
  -3 -12   2    3.14    1.90
   3 -12  -2    3.05    1.96
  -3 -12   2    2.49    2.14
   3 -12  -2    3.22    1.79
   3 -12  -1    0.37    2.05
  -3 -12   1    3.58    2.21
   3 -12  -1   -0.12    2.08
  -3 -12   1   -2.08    1.67
   3 -12  -1   -0.29    2.50
   3 -12   0    4.67    1.94
  -3 -12   0    7.98    1.97
   3 -12   0    9.01    2.14
  -3 -12   0    4.87    2.28
   3 -12   0    6.92    2.04
   3 -12   1   12.73    2.13
  -3 -12  -1    8.60    2.55
   3 -12   1   14.37    1.99
  -3 -12  -1   18.89    2.30
   3 -12   2    3.53    2.09
  -3 -12  -2    2.08    1.92
   3 -12   2    0.54    1.57
   3 -12   3    0.78    2.15
  -3 -12  -3    1.42    3.46
   3 -12   3    2.08    2.09
   3 -12   4    6.06    1.70
  -3 -12  -4    9.48    2.24
   3 -12   4    5.89    1.74
   3 -12   5    0.72    1.93
  -3 -12  -5   -0.21    1.85
   3 -12   5   -1.53    2.03
   3 -12   6    2.30    1.61
  -3 -12  -6    2.31    2.31
   3 -12   6    0.72    2.33
   3 -12   7    0.93    2.05
  -3 -12  -7    3.91    2.39
   3 -12   7   -0.34    2.03
  -3 -12  -8   11.47    2.81
  -3  12  -8    4.13    2.41
   3 -12   9   -0.13    3.52
  -3 -12  -9   -0.15    2.45
  -3  12  -9    1.26    2.28
   3 -12  10    0.56    2.24
  -3 -12 -10   -1.04    2.62
  -3  12 -10   -2.16    2.66
  -3 -12 -11    2.99    2.54
   3 -13 -10    4.45    2.50
   3 -13  -9   -2.17    1.85
   3 -13  -8    1.68    2.13
   3 -13  -7    2.50    2.23
   3 -13  -6    2.62    2.19
   3 -13  -5    3.17    1.83
   3 -13  -4    1.56    2.48
   3 -13  -4   -0.42    2.11
  -3 -13   4    0.68    2.55
   3 -13  -3    9.62    2.87
  -3 -13   3   10.17    2.65
   3 -13  -3   12.18    2.69
  -3 -13   2    1.98    2.82
   3 -13  -2    5.07    2.15
  -3 -13   2    1.83    2.18
   3 -13  -2    6.63    1.98
   3 -13  -1   11.50    2.42
  -3 -13   1   13.37    3.06
   3 -13  -1   16.34    2.78
   3 -13  -1   14.90    3.08
   3 -13   0    3.60    2.20
  -3 -13   0    1.86    2.27
   3 -13   0    5.04    3.11
   3 -13   1    0.14    2.23
  -3 -13  -1   -0.48    2.40
   3 -13   1    1.72    1.65
   3 -13   1    0.62    2.24
   3 -13   2    3.83    2.84
  -3 -13  -2    4.51    2.64
   3 -13   2    3.28    2.35
   3 -13   2   11.55    2.45
   3 -13   3    2.03    2.98
  -3 -13  -3   -0.04    1.98
   3 -13   3    2.23    1.98
   3 -13   3   -1.14    1.90
   3 -13   4    1.05    2.52
  -3 -13  -4    4.98    2.33
   3 -13   4    3.95    2.66
   3 -13   4    5.12    2.17
  -3 -13  -5    1.51    2.55
   3 -13   5    1.11    1.95
  -3 -13  -6    1.11    2.46
   3 -13   6    1.76    2.32
  -3 -13  -7    9.00    2.72
   3 -13   7    1.05    2.52
  -3 -13  -8    2.52    2.54
   3 -14  -4    0.90    2.28
   3 -14  -3    3.63    2.50
   3 -14  -2    1.44    2.54
   3 -14  -1   -0.25    2.55
   3 -14  -1    0.37    2.03
   3 -14   0   -1.40    2.38
   3 -14   1   -2.21    2.12
  -4   0  25    0.97    1.48
  -4   0  25   -1.08    1.69
  -4   0  24   -0.81    1.46
  -4   0  24   -1.20    1.59
  -4   0  23    1.02    1.27
  -4   0  23    0.89    1.97
  -4   0  22    0.91    1.24
  -4   0  22   -0.67    1.75
  -4   0  21    1.18    1.71
  -4   0  21    0.18    1.93
  -4   0  20   48.01    3.31
  -4   0  19   -0.79    1.46
  -4   0  19   -0.95    1.30
  -4   0  18    7.22    1.69
  -4   0  18    6.28    2.13
  -4   0  18    7.88    1.59
  -4   0  17    2.46    1.65
  -4   0  17   -5.49    2.66
  -4   0  17   -0.96    1.78
  -4   0  16    8.82    1.67
  -4   0  16    9.22    2.44
  -4   0  16   12.88    1.78
  -4   0  15    2.14    3.27
  -4   0  15   -0.23    1.40
  -4   0  15    0.18    2.19
  -4   0  15    0.55    1.54
  -4   0  14   15.00    2.62
  -4   0  14   18.84    2.05
  -4   0  14   20.54    3.54
  -4   0  14   17.09    1.84
  -4   0  13    2.36    2.67
  -4   0  13    0.59    1.30
  -4   0  13    1.22    1.94
  -4   0  13   -0.43    1.37
   4   0 -13   -0.48    1.62
  -4   0  12   51.89    3.49
  -4   0  12   55.09    3.50
  -4   0  12   58.44    4.15
  -4   0  12   54.85    3.27
  -4   0  11   -0.10    1.55
  -4   0  11   -0.71    0.99
  -4   0  11    1.44    1.68
  -4   0  11    0.15    0.92
  -4   0  10    3.22    1.67
  -4   0   9    0.47    2.14
  -4   0   8    1.16    2.06
   4   0  -8   -0.52    2.06
  -4   0   7   -0.71    1.43
   4   0  -7   -0.78    1.33
  -4   0   6  338.03   12.51
   4   0  -6  356.95    9.37
  -4   0   5    1.15    1.89
   4   0  -5    0.34    1.78
  -4   0   4  731.67   13.94
  -4   0   4  782.47   14.65
  -4   0   3    0.04    1.55
  -4   0   3    0.25    1.78
   4   0  -2  704.38   13.17
  -4   0   2  676.80   12.82
   4   0  -1   -0.99    1.67
  -4   0   1    0.28    1.70
   4   0   0  148.90    6.32
  -4   0   0  140.65    6.20
   4   0   1   -0.32    1.42
  -4   0  -1    0.21    1.74
   4   0   2  588.31   12.05
  -4   0  -2  544.83   11.85
   4   0   3   -1.02    1.51
  -4   0  -3    0.18    1.93
   4   0   4    1.51    1.54
  -4   0  -4   -0.11    1.96
   4   0   5   -0.98    1.50
   4   0   6    3.68    1.65
   4   0   7   -0.51    2.08
   4   0   9   -1.61    1.54
   4   0   9    0.06    1.22
   4   0   9    1.82    1.62
  -4   0  -9   -1.86    2.05
   4   0  10   14.59    2.84
   4   0  10   20.53    1.97
   4   0  10   12.90    1.64
  -4   0 -10   18.83    3.05
   4   0  11   -1.43    1.95
   4   0  11   -0.51    2.00
   4   0  11   -1.06    1.53
   4   0  12    2.15    2.31
   4   0  12    4.05    1.07
   4   0  12    3.87    1.68
   4   0  13   -0.75    0.94
   4   0  13    1.94    1.34
   4   0  14    1.77    1.06
   4   0  15    0.37    1.43
   4   0  15   -0.95    1.56
   4   0  15    1.67    1.44
   4   0  16   12.12    1.64
   4   0  16    5.20    1.80
   4   0  16   10.41    1.91
   4   0  17    2.79    1.55
   4   0  17    2.30    2.18
   4   0  18    4.38    1.52
   4   0  19    1.05    1.72
   4   0  20   43.01    2.90
   4   0  20   19.42    5.08
   4   0  21   -0.64    1.67
   4   0  21   -2.67    1.88
   4   0  22   -1.26    2.65
  -4  -1  25   -1.62    1.53
  -4   1  25   -0.50    1.50
  -4  -1  25   -0.22    2.15
  -4   1  25    0.56    2.13
  -4  -1  24   -0.81    1.47
  -4   1  24    1.15    1.66
  -4  -1  24    1.39    2.13
  -4   1  24    0.55    1.84
  -4  -1  23    3.10    1.62
  -4   1  23    1.25    1.32
  -4  -1  23   -0.63    1.57
  -4   1  23    2.97    1.93
  -4  -1  22    1.22    1.50
  -4   1  22   -1.51    1.24
  -4  -1  22   -1.19    1.51
  -4   1  22   -1.09    1.88
  -4  -1  21    2.74    1.64
  -4   1  21    2.95    1.39
  -4  -1  21    3.74    1.92
  -4   1  21    4.04    2.06
  -4  -1  20    0.57    1.21
  -4   1  20    1.06    1.70
  -4  -1  20    0.31    1.47
  -4   1  20    3.51    1.72
  -4  -1  19    2.87    1.28
  -4   1  19    4.91    1.31
  -4  -1  19   -1.12    1.68
  -4   1  19    1.92    1.41
  -4  -1  18    2.40    1.19
  -4   1  18    1.56    1.74
  -4   1  18    3.07    2.13
  -4  -1  18    2.45    2.03
  -4  -1  18   -1.48    1.30
  -4   1  18    0.61    1.69
   4  -1 -18    2.01    1.84
  -4  -1  17    0.12    1.71
  -4   1  17    0.62    1.16
  -4  -1  17    0.29    2.65
  -4   1  17   -1.80    2.68
  -4  -1  17    0.09    1.20
  -4   1  17   -0.56    1.26
   4  -1 -17    0.06    1.61
  -4  -1  16    0.06    1.15
  -4   1  16   -0.20    1.13
  -4  -1  16    4.62    2.20
  -4   1  16   -0.42    2.15
  -4  -1  16    2.06    1.55
  -4   1  16    1.93    1.25
   4  -1 -16    0.60    1.85
  -4  -1  15   -0.12    2.37
  -4   1  15    1.00    3.46
  -4  -1  15    2.44    1.08
  -4   1  15    1.00    1.55
  -4  -1  15   -1.13    2.93
  -4   1  15    1.70    2.11
  -4  -1  15    1.28    1.65
  -4   1  15   -0.13    1.51
   4  -1 -15   -0.14    1.38
  -4  -1  14    0.86    2.00
  -4   1  14    3.16    3.03
  -4  -1  14    2.68    1.07
  -4   1  14    4.24    1.20
  -4   1  14    4.28    3.10
  -4  -1  14    0.13    2.22
  -4  -1  14    4.82    1.46
  -4   1  14    4.50    1.20
   4  -1 -14   -0.06    1.72
  -4  -1  13   58.81    4.40
  -4   1  13   67.11    5.22
  -4  -1  13   76.95    3.94
  -4   1  13   77.41    4.06
  -4  -1  13   81.92    5.40
  -4   1  13   87.22    5.98
  -4  -1  13   73.88    3.72
  -4   1  13   77.16    3.79
   4  -1 -13   66.86    4.40
  -4  -1  12   -0.19    2.26
  -4   1  12    0.47    2.40
  -4  -1  12    0.02    0.91
  -4   1  12    0.23    1.34
  -4  -1  12   -0.61    2.56
  -4   1  12   -3.74    2.42
  -4  -1  12   -0.41    1.00
  -4   1  12   -0.03    0.95
   4  -1 -12    0.39    1.37
   4  -1 -12   -1.62    1.07
  -4  -1  11   53.55    4.18
  -4   1  11   61.44    4.39
  -4  -1  11   53.05    3.09
  -4   1  11   57.95    3.35
  -4  -1  11   59.31    4.52
  -4   1  11   60.15    4.55
  -4  -1  11   54.51    3.17
  -4   1  11   48.22    2.64
  -4  -1  10  194.98    8.30
  -4   1  10  195.84    8.42
  -4   1  10  171.71    6.92
  -4  -1   9   27.05    2.87
  -4   1   9   23.62    2.56
   4   1  -9   23.10    2.94
  -4  -1   8    3.69    1.95
  -4   1   8    4.49    1.70
   4   1  -8    3.45    1.76
  -4  -1   7  219.81    9.16
  -4   1   7  223.00    9.07
   4   1  -7  202.78    8.98
   4  -1  -7  197.85    8.89
  -4  -1   6    3.19    1.74
  -4   1   6    4.19    1.78
   4   1  -6    3.12    1.70
   4  -1  -6    3.51    1.60
  -4   1   5    3.49    2.01
  -4  -1   5    5.18    1.70
  -4   1   5    5.17    2.28
   4   1  -5    3.68    1.61
  -4  -1   4  215.56    9.22
  -4   1   4  241.09    9.74
  -4  -1   4  219.77    9.11
  -4   1   4  239.22    9.81
   4  -1  -3  303.82   11.37
  -4   1   3  332.64   12.23
  -4  -1   3  347.77   11.22
   4  -1  -2   27.86    3.04
   4   1  -2   27.91    2.65
  -4   1   2   30.81    2.86
  -4  -1   2   28.62    2.67
   4  -1  -1  168.75    6.84
  -4   1   1  185.80    6.04
   4   1  -1  183.11    6.08
  -4  -1   1  170.33    7.19
   4  -1   0 3295.83   38.28
  -4   1   0 3244.31   38.92
  -4  -1   0 3183.81   38.40
   4  -1   1    1.17    1.47
  -4   1  -1   -0.61    1.99
   4   1   1    0.52    1.85
  -4  -1  -1   -0.81    1.66
   4  -1   2  379.31    8.93
  -4   1  -2  404.57   10.20
   4   1   2  394.11    9.66
  -4  -1  -2  362.07    9.36
   4  -1   3   36.19    2.93
   4   1   3   34.95    3.29
  -4   1  -3   35.06    3.13
  -4  -1  -3   32.70    3.27
   4  -1   4  211.31    8.61
   4   1   4  191.53    8.06
  -4   1  -4  163.40    7.29
  -4  -1  -4  168.33    7.24
   4  -1   5   -0.04    1.54
   4   1   5    1.06    2.10
   4  -1   6   -0.10    2.12
   4   1   6    1.71    1.61
   4  -1   7   26.95    2.64
   4   1   7   29.03    3.02
   4  -1   8   -0.84    1.70
   4   1   8    0.32    1.50
   4  -1   8   -0.02    1.20
   4  -1   8   -0.25    1.17
   4   1   8   -0.28    1.49
  -4  -1  -8    0.36    2.35
   4  -1   9    8.97    2.52
   4   1   9   13.13    2.57
   4  -1   9    6.07    1.10
   4   1   9   10.44    1.24
   4  -1   9    6.26    1.37
   4   1   9   10.28    1.47
  -4  -1  -9   10.97    2.05
   4  -1  10    1.31    2.59
   4   1  10    1.21    2.09
   4  -1  10    1.27    1.32
   4   1  10    1.15    1.38
   4  -1  10   -0.40    1.63
   4   1  10    1.55    1.25
  -4  -1 -10    1.29    2.58
   4  -1  11   44.86    4.27
   4   1  11   48.60    3.68
   4  -1  11   54.68    2.88
   4   1  11   49.32    2.59
   4  -1  11   51.32    3.01
   4   1  11   53.19    3.60
  -4  -1 -11   60.66    5.76
   4  -1  12    7.67    2.50
   4   1  12    4.67    2.70
   4  -1  12    6.81    1.15
   4   1  12   11.35    1.31
   4  -1  12    7.01    1.30
   4  -1  12   10.77    1.99
   4   1  12    8.13    1.47
  -4  -1 -12   10.36    3.06
   4  -1  13   -0.61    1.28
   4   1  13   -1.52    0.94
   4  -1  13   -0.11    1.54
   4  -1  13   -2.07    1.29
   4   1  13    2.48    1.77
  -4  -1 -13    0.76    1.69
   4  -1  14   23.90    2.24
   4   1  14   18.50    2.09
   4  -1  14   16.38    2.30
   4  -1  14   22.62    2.74
   4   1  14   24.95    2.92
   4  -1  15    3.45    1.12
   4   1  15    0.07    1.32
   4  -1  15    3.68    1.67
   4  -1  15    2.95    1.49
   4   1  15    7.95    1.99
   4  -1  16   -1.08    1.46
   4   1  16   -0.46    1.08
   4  -1  16   -1.62    1.39
   4  -1  16   -1.03    1.57
   4   1  16   -0.16    1.54
   4  -1  17    3.94    1.46
   4   1  17    2.80    1.13
   4  -1  17    3.02    2.15
   4   1  17   -0.01    2.11
   4  -1  18    4.15    1.57
   4   1  18    3.24    1.48
   4  -1  18   -2.58    1.64
   4   1  18    5.50    1.67
   4  -1  19    1.42    1.76
   4   1  19    2.93    1.51
   4  -1  19   -1.66    2.44
   4   1  19    0.76    2.07
   4  -1  20    9.60    1.48
   4   1  20    5.96    1.75
   4  -1  20    3.50    1.98
   4   1  20   -0.24    2.14
   4  -1  21    1.46    1.63
   4   1  21    0.38    1.48
   4  -1  21    0.38    2.52
   4   1  21    1.48    2.26
   4  -1  22   -0.10    1.48
   4   1  22    1.03    2.30
   4  -1  22    5.72    2.47
   4   1  22   -0.02    2.76
  -4  -2  25    0.75    1.52
  -4   2  25   -0.34    1.52
  -4  -2  25   -0.60    2.20
  -4   2  25    0.58    2.06
  -4  -2  24    2.26    1.60
  -4   2  24   -0.19    1.24
  -4  -2  24   -2.16    1.86
  -4   2  24    1.41    1.75
  -4  -2  23    6.25    1.67
  -4   2  23    4.86    1.34
  -4  -2  23    3.73    2.32
  -4   2  23    8.13    1.89
  -4  -2  22    3.05    1.44
  -4   2  22    1.44    1.28
  -4  -2  22    1.80    1.57
  -4   2  22    4.60    1.96
  -4  -2  21   -1.07    1.22
  -4   2  21    0.85    1.59
  -4  -2  21    1.79    1.49
  -4   2  21    3.64    1.94
  -4  -2  20    2.85    1.22
  -4   2  20    0.15    1.42
  -4  -2  20    0.15    1.73
  -4   2  20    0.13    1.80
   4  -2 -20   -1.19    2.25
  -4  -2  19    4.96    1.25
  -4   2  19    5.38    1.40
  -4  -2  19    2.68    1.89
  -4   2  19    3.61    1.81
   4  -2 -19   -1.47    2.53
  -4  -2  18   15.69    2.38
  -4   2  18   18.40    2.87
  -4   2  18   16.97    2.94
  -4  -2  18   14.32    2.38
  -4   2  18   16.48    2.29
   4  -2 -18   12.70    2.90
  -4  -2  17    2.70    1.19
  -4   2  17    4.12    1.94
  -4  -2  17   -1.38    2.64
  -4   2  17   -1.36    2.74
  -4  -2  17    3.54    1.69
  -4   2  17    1.09    1.29
   4  -2 -17   -1.52    2.04
  -4  -2  16    1.22    1.12
  -4   2  16    2.97    1.18
  -4  -2  16   -2.05    2.06
  -4   2  16    2.93    2.09
  -4  -2  16    1.61    1.58
  -4   2  16    0.81    1.66
   4  -2 -16    1.28    1.60
  -4  -2  15    1.71    1.03
  -4   2  15   -0.87    1.11
  -4  -2  15    2.21    2.05
  -4   2  15   -0.36    2.11
  -4  -2  15    0.56    1.55
  -4   2  15   -1.81    2.13
   4  -2 -15   -0.17    1.89
  -4  -2  14   -0.03    2.37
  -4   2  14   -1.03    2.15
  -4  -2  14    3.12    1.09
  -4   2  14    1.89    1.51
  -4  -2  14    0.41    2.71
  -4  -2  14    2.47    1.41
  -4   2  14   -0.69    1.07
   4  -2 -14    0.80    1.21
  -4  -2  13    0.91    1.83
  -4   2  13    2.50    2.77
  -4  -2  13   -2.01    0.88
  -4   2  13    0.58    1.52
  -4  -2  13   -2.03    1.81
  -4   2  13    0.93    2.71
  -4  -2  13    0.56    1.02
  -4   2  13    0.32    1.31
   4  -2 -13   -0.27    1.46
   4  -2 -13   -0.38    1.44
  -4  -2  12   -0.47    1.58
  -4   2  12    2.60    1.88
  -4  -2  12   -0.47    1.25
  -4   2  12    1.20    1.13
  -4  -2  12    3.67    2.87
  -4   2  12    1.77    2.42
  -4   2  12    0.64    1.35
   4  -2 -12   -0.56    1.31
   4  -2 -12    1.65    1.18
  -4  -2  11   37.78    3.30
  -4   2  11   33.51    3.15
  -4  -2  11   32.22    2.10
  -4   2  11   38.83    3.38
  -4  -2  11   37.70    3.57
  -4   2  11   36.98    3.40
  -4  -2  11   33.23    2.24
  -4   2  11   33.24    2.14
   4  -2 -11   35.98    2.59
   4  -2 -11   38.12    2.67
  -4  -2  10   48.42    3.47
  -4   2  10   60.90    4.41
  -4   2  10   55.38    3.26
  -4  -2  10   62.17    4.27
  -4   2  10   50.32    2.97
  -4  -2   9   59.48    3.60
  -4   2   9   53.23    3.85
   4   2  -9   47.17    3.51
  -4  -2   8    8.25    1.61
  -4   2   8    8.69    2.52
   4   2  -8    6.40    1.64
  -4  -2   7   21.29    2.18
   4   2  -7   19.82    2.49
  -4   2   7   22.84    2.95
  -4   2   6   13.93    2.16
  -4  -2   6   14.78    2.24
   4   2  -6   13.94    2.25
  -4   2   6   11.83    2.19
  -4   2   5    4.60    2.15
  -4  -2   5    1.88    1.42
   4   2  -5    1.67    1.50
  -4   2   5    2.02    2.46
  -4   2   4    4.48    1.67
  -4   2   4    1.65    2.35
   4  -2  -3    2.61    2.36
  -4   2   3    1.48    1.45
   4  -2  -2  142.68    6.37
  -4   2   2  126.13    5.63
  -4   2   1  402.27   10.01
   4   2  -1  408.74    9.79
  -4  -2   1  412.85   10.25
   4  -2   0  729.74   13.25
  -4   2   0  737.01   13.82
   4   2   0  784.42   14.45
  -4  -2   0  760.04   14.69
   4  -2   1  380.86    8.87
  -4   2  -1  360.94    9.12
   4   2   1  382.58    9.31
  -4  -2  -1  361.33    9.75
   4  -2   2  267.47   10.47
  -4   2  -2  245.84    9.80
   4   2   2  262.21   10.25
  -4  -2  -2  237.47   10.22
   4  -2   3   46.17    3.15
  -4   2  -3   36.32    2.86
   4   2   3   44.60    3.15
  -4  -2  -3   32.69    3.08
   4  -2   4   27.96    2.71
   4   2   4   22.81    2.87
  -4  -2  -4   23.52    2.92
   4  -2   5    0.85    2.26
   4   2   5    1.18    1.50
   4  -2   6   45.91    3.58
   4   2   6   39.77    3.27
   4  -2   7  111.45    5.83
   4   2   7  112.88    5.93
   4  -2   7  109.98    5.98
  -4  -2  -7   97.12    5.72
   4  -2   7  124.01    5.39
   4  -2   8  292.20   11.09
   4   2   8  272.58   11.07
   4  -2   8  300.38   10.01
  -4  -2  -8  306.01   12.34
   4  -2   8  283.09    9.97
   4  -2   8  279.38   10.26
   4  -2   9  115.73    6.38
   4   2   9  127.58    6.63
   4  -2   9  121.45    5.29
   4   2   9  110.99    5.42
  -4  -2  -9  130.18    6.98
   4  -2   9  130.40    6.05
   4   2   9  125.23    5.93
   4  -2  10    7.55    2.17
   4   2  10    9.62    2.20
   4  -2  10   13.28    1.52
   4   2  10   12.92    1.37
   4  -2  10   10.58    1.39
   4  -2  10   12.52    2.08
   4   2  10   12.72    1.53
  -4  -2 -10   13.26    2.34
   4  -2  11    1.78    2.02
   4   2  11    4.08    2.71
   4  -2  11    3.34    1.04
   4  -2  11    4.18    1.23
   4  -2  11    3.32    1.45
   4   2  11    4.04    1.84
  -4  -2 -11    0.69    1.73
   4  -2  12   36.72    3.13
   4   2  12   34.85    3.16
   4  -2  12   38.15    3.44
   4  -2  12   37.16    3.43
   4   2  12   34.13    4.96
  -4  -2 -12   33.75    4.98
   4  -2  13    7.13    1.28
   4   2  13    9.84    1.40
   4  -2  13    7.58    1.66
   4  -2  13    8.60    1.71
   4   2  13    8.00    1.65
  -4  -2 -13    6.21    2.17
   4  -2  14    1.13    1.46
   4   2  14   -0.30    1.15
   4  -2  14    2.45    1.92
   4   2  14   -0.62    1.25
  -4  -2 -14    0.06    2.78
   4  -2  15    9.59    1.36
   4   2  15    5.86    1.21
   4  -2  15    8.75    1.94
   4  -2  15    7.10    1.76
   4   2  15    8.70    1.65
   4  -2  16   12.33    1.63
   4   2  16   12.51    1.70
   4   2  16   11.68    2.20
   4  -2  17   13.87    2.03
   4   2  17   13.70    1.84
   4  -2  17    6.50    1.90
   4   2  17   12.04    2.11
   4  -2  18   -0.94    1.35
   4  -2  18    3.10    2.48
   4   2  18   -1.98    2.00
   4  -2  19    5.18    1.50
   4   2  19    4.08    1.63
   4  -2  19    2.57    2.25
   4   2  19    1.93    2.77
   4  -2  20    3.16    1.27
   4   2  20    3.48    1.72
   4  -2  20   -0.79    2.55
   4  -2  21    0.88    1.50
   4   2  21    1.24    1.80
   4  -2  21   -1.10    1.93
   4   2  21    0.35    2.46
   4  -2  22    0.40    1.61
   4  -2  22    0.56    2.26
  -4   3  25    1.72    1.68
  -4  -3  24    0.28    1.48
  -4   3  24   -0.07    1.21
  -4  -3  24   -0.78    2.16
  -4  -3  23    7.29    2.10
  -4   3  23    5.77    1.38
  -4  -3  23    8.12    2.42
  -4   3  23    4.59    2.03
  -4  -3  22    1.57    1.21
  -4   3  22   -0.38    1.50
  -4  -3  22    3.53    2.12
  -4   3  22    0.25    1.95
  -4  -3  21    3.49    1.40
  -4   3  21    3.08    1.31
  -4  -3  21    1.06    1.60
  -4   3  21    1.48    1.77
   4  -3 -21    2.32    2.49
  -4  -3  20    0.46    1.16
  -4   3  20    0.58    1.28
  -4  -3  20    1.95    1.83
  -4   3  20   -3.02    1.25
   4  -3 -20    2.38    3.07
  -4  -3  19    6.54    2.54
  -4   3  19    6.57    1.43
  -4  -3  19    7.24    2.07
  -4   3  19    4.59    1.39
   4  -3 -19    3.48    2.62
  -4  -3  18   23.09    2.96
  -4   3  18   17.85    2.40
  -4  -3  18   26.53    3.36
  -4   3  18   21.13    2.79
   4  -3 -18   17.79    3.13
  -4  -3  17    2.32    1.14
  -4   3  17    3.26    1.31
  -4   3  17    5.32    2.52
  -4  -3  17    0.99    1.31
  -4   3  17    2.98    1.71
   4  -3 -17    1.20    2.00
  -4   3  16    2.09    1.26
  -4  -3  16    3.76    2.00
  -4   3  16   -1.13    1.90
  -4  -3  16    0.53    1.22
  -4   3  16   -0.38    1.55
   4  -3 -16   -0.96    1.51
  -4  -3  15   16.13    1.84
  -4   3  15   21.37    2.35
  -4  -3  15   18.44    2.74
  -4   3  15   19.31    3.36
  -4  -3  15   18.83    2.38
  -4   3  15   18.41    2.21
   4  -3 -15   18.61    2.61
  -4   3  14    4.19    3.14
  -4  -3  14    3.13    1.41
  -4   3  14    1.12    1.26
  -4   3  14    4.65    2.66
  -4  -3  14    1.32    1.08
  -4   3  14    0.11    1.31
   4  -3 -14    1.62    1.64
   4  -3 -14    0.85    1.30
  -4  -3  13    6.92    2.15
  -4   3  13    8.95    2.47
  -4  -3  13    8.49    1.24
  -4   3  13   12.43    1.97
  -4  -3  13   11.25    2.47
  -4   3  13    9.94    2.40
  -4  -3  13   10.08    1.36
  -4   3  13    9.24    1.59
   4  -3 -13    8.38    1.37
  -4  -3  12    0.35    2.23
  -4   3  12    2.09    2.72
  -4  -3  12    0.58    1.28
  -4   3  12    2.20    1.51
  -4  -3  12    3.30    3.08
  -4   3  12    0.48    1.87
  -4  -3  12    2.50    1.40
  -4   3  12   -0.68    1.00
   4  -3 -12    3.03    1.56
   4  -3 -12    1.73    1.25
  -4  -3  11   63.23   11.28
  -4   3  11   65.47    4.83
  -4  -3  11   69.88    3.50
  -4   3  11   73.56    3.87
  -4  -3  11   60.74    4.76
  -4   3  11   67.73    4.34
  -4  -3  11   68.85    3.74
  -4   3  11   64.17    3.36
   4  -3 -11   63.89    3.38
   4  -3 -11   56.34    3.86
  -4  -3  10  266.64   10.81
  -4   3  10  240.18    9.94
  -4   3  10  230.03    8.07
  -4  -3   9   14.23    2.32
  -4   3   9   16.66    2.40
   4   3  -9   12.57    2.52
   4  -3  -9   14.90    2.11
  -4   3   9   12.41    1.51
   4  -3  -9   14.84    1.54
  -4  -3   8    0.74    1.56
   4   3  -8    2.25    1.84
  -4   3   8    1.24    1.70
  -4  -3   7    1.39    1.49
   4   3  -7    0.52    1.56
  -4   3   7   -0.09    1.61
  -4  -3   6   56.85    3.41
   4   3  -6   53.43    3.71
  -4   3   6   54.05    3.58
  -4  -3   5   28.96    2.62
   4   3  -5   26.34    2.94
  -4   3   5   30.96    2.95
  -4   3   4  250.06   10.21
   4   3  -4  280.57   11.68
   4   3  -4  275.18   11.63
  -4   3   4  273.35   10.68
  -4   3   3   40.76    3.04
   4   3  -3   42.44    3.45
   4   3  -3   39.78    3.63
  -4   3   3   45.40    3.88
   4  -3  -2   10.30    2.17
  -4   3   2   11.04    2.36
   4   3  -2   12.30    1.82
   4   3  -2   11.53    1.91
   4   3  -1  165.76    7.12
   4  -3  -1  144.04    6.25
  -4   3   1  167.72    6.84
   4   3  -1  177.99    7.28
   4  -3   0  178.74    7.13
  -4   3   0  167.88    6.74
   4   3   0  176.34    7.29
  -4  -3   0  179.31    7.86
   4  -3   1  245.51    9.56
  -4   3  -1  223.56    9.32
   4   3   1  249.65   10.09
  -4  -3  -1  227.63    9.70
   4  -3   2  164.59    6.56
   4   3   2  175.37    7.28
  -4  -3  -2  151.27    6.74
   4  -3   3   74.11    4.80
   4   3   3   73.76    5.06
  -4  -3  -3   61.23    4.48
   4  -3   4  128.39    5.65
   4   3   4  129.56    5.86
   4  -3   5   29.83    3.08
   4   3   5   33.59    3.11
   4  -3   6   10.93    2.43
   4   3   6    9.43    1.96
   4  -3   6   10.85    1.22
  -4  -3  -6   13.59    1.82
   4  -3   6    8.57    1.54
  -4  -3  -6   12.22    2.30
   4  -3   7   21.78    2.54
   4   3   7   24.41    2.66
   4  -3   7   23.41    1.74
  -4  -3  -7   25.43    2.68
   4  -3   7   29.72    2.17
   4  -3   7   28.62    2.34
  -4  -3  -7   26.89    3.00
   4  -3   8   20.09    2.70
   4   3   8   26.73    3.06
   4  -3   8   28.69    2.39
   4   3   8   19.22    1.96
  -4  -3  -8   26.91    2.75
   4  -3   8   29.80    2.49
   4  -3   8   30.68    2.81
   4   3   8   22.23    2.52
  -4  -3  -8   36.99    4.36
   4  -3   9    2.96    1.88
   4   3   9    2.98    2.23
   4  -3   9    2.68    1.27
   4   3   9    3.07    1.22
  -4  -3  -9    1.98    2.15
   4  -3   9    1.48    1.67
   4   3   9    3.11    1.25
  -4  -3  -9    1.28    1.74
   4  -3  10   14.73    2.54
   4   3  10   13.44    2.29
   4  -3  10   14.70    1.58
   4   3  10   14.72    1.88
  -4  -3 -10   16.40    2.21
   4  -3  10   14.86    1.93
   4  -3  10   13.14    1.72
   4   3  10   12.26    1.73
  -4  -3 -10   17.00    2.76
   4  -3  11   27.48    4.09
   4   3  11   22.46    3.62
   4  -3  11   30.46    2.88
   4   3  11   28.61    2.83
  -4  -3 -11   29.59    3.51
   4  -3  11   27.48    3.36
   4  -3  11   28.48    3.11
   4   3  11   21.75    2.22
  -4  -3 -11   20.84    3.32
   4  -3  12   -0.07    0.94
   4   3  12    0.25    1.43
   4  -3  12    0.51    1.37
   4  -3  12    3.16    2.14
   4   3  12   -0.95    1.66
  -4  -3 -12   -2.97    2.60
   4  -3  13    7.03    1.30
   4   3  13    2.58    1.30
   4  -3  13    6.48    1.56
   4  -3  13    4.04    1.61
   4   3  13    6.20    1.75
  -4  -3 -13    4.70    2.17
   4  -3  14    4.36    1.21
   4   3  14    3.38    1.13
   4  -3  14    6.23    1.64
   4  -3  14    6.24    2.25
   4   3  14    5.66    1.92
  -4  -3 -14   -1.25    2.99
   4  -3  15    1.42    1.41
   4   3  15    2.91    1.11
   4  -3  15    6.21    1.82
   4   3  15    2.48    1.42
  -4  -3 -15    2.24    3.37
   4  -3  16   12.37    1.69
   4   3  16   10.56    1.80
   4  -3  16   12.15    2.54
   4   3  16   14.14    2.84
   4  -3  17   -2.31    1.36
   4   3  17    0.02    1.23
   4  -3  17   -2.63    2.23
   4   3  17    1.44    1.91
   4  -3  18   -0.39    1.46
   4  -3  18    1.90    1.82
   4   3  18    1.49    2.22
   4  -3  19    3.86    1.55
   4   3  19    0.41    1.35
   4  -3  19    2.49    2.40
   4   3  19    2.51    2.61
   4  -3  20    1.64    1.72
   4   3  20    0.35    1.38
   4  -3  20    1.42    3.13
   4   3  20   -2.02    4.53
   4  -3  21   -0.44    1.42
   4   3  21   -0.79    1.77
   4  -3  21    0.03    2.60
   4   3  21    1.11    2.90
   4  -3  22    5.02    1.72
   4  -3  22    0.14    2.33
  -4   4  24    3.01    1.44
  -4  -4  23    1.84    1.67
  -4   4  23    3.91    1.64
  -4  -4  23    0.50    2.48
  -4   4  23    3.22    1.84
  -4  -4  22    3.50    1.66
  -4   4  22    5.26    2.00
  -4  -4  22    2.25    2.14
  -4   4  22    1.29    1.71
  -4  -4  21    0.49    1.64
  -4   4  21    2.39    1.30
  -4  -4  21    1.23    1.64
  -4   4  21   -1.31    2.91
   4  -4 -21    0.71    2.51
  -4  -4  20    1.11    1.19
  -4   4  20    3.04    1.61
  -4  -4  20    0.55    1.84
  -4   4  20    1.03    1.30
   4  -4 -20   -3.51    2.50
  -4  -4  19    0.46    1.44
  -4   4  19   -0.59    1.58
  -4  -4  19    2.32    1.79
  -4   4  19    0.44    1.30
   4  -4 -19    2.61    1.99
  -4  -4  18    2.25    1.46
  -4   4  18    0.75    1.54
  -4  -4  18   -1.24    1.31
  -4   4  18   -0.79    1.22
   4  -4 -18    2.05    2.54
  -4  -4  17   22.93    2.21
  -4   4  17   26.23    2.55
  -4  -4  17   25.71    2.93
  -4   4  17   26.22    2.54
  -4  -4  16   10.07    1.71
  -4   4  16    9.46    1.64
  -4   4  16    2.58    3.72
  -4  -4  16    8.57    2.62
  -4   4  16    6.74    1.37
   4  -4 -16    7.32    1.96
  -4  -4  15    2.38    1.09
  -4   4  15    5.68    1.30
  -4  -4  15   -0.42    2.31
  -4   4  15    3.69    1.98
  -4  -4  15    3.70    1.42
  -4   4  15    3.11    1.20
   4  -4 -15    1.15    1.39
  -4  -4  14   12.78    1.74
  -4   4  14   10.69    1.93
  -4  -4  14   12.83    2.32
  -4   4  14   10.25    3.27
  -4  -4  14   11.39    1.65
  -4   4  14   13.92    1.72
   4  -4 -14    8.51    1.62
   4  -4 -14    6.35    1.66
  -4   4  13    0.69    2.42
  -4  -4  13    0.95    0.89
  -4   4  13    1.78    1.23
  -4  -4  13   -0.43    2.08
  -4   4  13    3.01    2.67
  -4  -4  13    0.99    1.04
  -4   4  13    1.39    1.44
   4  -4 -13    3.50    1.29
   4  -4 -13    0.19    1.26
  -4   4  12   11.27    3.25
  -4  -4  12   12.71    1.67
  -4   4  12   11.42    1.73
  -4  -4  12    7.03    2.31
  -4   4  12    7.98    2.12
   4  -4 -12    7.05    1.48
  -4  -4  12   10.05    1.77
  -4   4  12   10.90    1.32
   4  -4 -12   11.12    1.47
   4  -4 -12   10.13    2.03
  -4  -4  11   23.77    3.06
  -4   4  11   30.99    3.42
  -4  -4  11   24.88    1.99
  -4   4  11   30.60    2.46
  -4  -4  11   19.94    2.94
  -4   4  11   19.63    2.64
   4  -4 -11   22.02    2.64
  -4  -4  11   25.00    2.18
  -4   4  11   26.57    2.31
   4  -4 -11   33.67    2.54
   4  -4 -11   31.93    2.64
  -4  -4  10   15.48    2.35
  -4   4  10   15.76    2.48
   4  -4 -10   22.65    2.35
  -4  -4  10   16.15    2.34
  -4  -4  10    8.78    2.48
  -4   4  10   13.74    2.74
   4  -4 -10   14.91    2.17
  -4  -4  10   12.55    1.42
  -4   4  10   15.77    1.55
   4  -4 -10   15.24    3.31
   4  -4 -10   17.20    2.05
  -4   4   9   82.90    5.47
   4  -4  -9   80.25    4.65
  -4   4   9   67.96    3.88
  -4  -4   8  370.90   14.14
  -4   4   8  362.48   13.30
   4  -4  -8  388.19   12.90
   4  -4  -8  347.60   12.32
   4  -4  -8  363.42   12.41
  -4  -4   7   63.17    4.42
   4   4  -7   57.87    4.27
  -4   4   7   66.79    4.64
   4  -4  -7   70.57    4.01
   4  -4  -7   59.36    2.64
  -4  -4   6    7.01    1.69
   4   4  -6    4.17    1.63
  -4   4   6    7.62    2.01
   4   4  -5   24.88    2.46
  -4   4   5   27.04    3.19
   4   4  -5   27.40    2.64
   4   4  -4    0.68    1.21
   4   4  -4    0.04    1.23
  -4   4   4    0.49    2.31
   4   4  -3   42.81    3.09
   4   4  -3   46.34    3.31
  -4   4   3   49.63    3.85
   4  -4  -2    3.95    2.39
   4   4  -2    4.06    1.38
   4   4  -2    4.44    1.46
   4  -4  -1  198.75    8.59
   4   4  -1  177.54    7.34
   4   4  -1  203.03    8.78
   4   4   0   -0.54    1.51
   4  -4   0    0.14    2.28
   4   4   0    0.51    1.60
   4   4   1   21.49    2.48
   4  -4   1   24.17    2.98
   4   4   1   23.29    2.66
   4  -4   2    7.21    1.85
   4   4   2    7.80    2.06
  -4  -4  -2    6.01    1.85
   4  -4   3   41.14    3.41
   4   4   3   42.93    3.41
   4  -4   4   56.30    3.72
   4   4   4   74.57    5.14
   4  -4   4   73.66    3.98
  -4  -4  -4   66.62    5.05
   4  -4   5   26.06    3.06
   4   4   5   22.87    3.00
   4  -4   5   21.23    1.68
  -4  -4  -5   22.13    2.31
   4  -4   5   24.91    1.86
   4  -4   5   22.95    3.08
  -4  -4  -5   23.50    3.07
   4  -4   6   17.29    2.32
   4   4   6   18.44    2.78
   4  -4   6   14.74    1.59
  -4  -4  -6   19.61    1.95
   4  -4   6   15.75    1.44
   4  -4   6   17.82    1.98
  -4  -4  -6   11.08    2.34
   4  -4   7    0.64    1.67
   4   4   7   -3.07    2.21
   4  -4   7    0.98    0.90
  -4  -4  -7    1.41    1.92
   4  -4   7    2.34    1.41
   4  -4   7    1.62    1.39
  -4  -4  -7    1.80    2.39
   4  -4   8   -1.81    2.25
   4   4   8   -1.24    1.70
   4  -4   8    0.65    1.24
   4   4   8   -0.34    1.40
  -4  -4  -8    0.20    1.38
   4  -4   8   -0.73    1.14
   4  -4   8   -3.05    1.60
  -4  -4  -8   -0.42    1.70
   4  -4   9    4.46    2.00
   4   4   9    2.34    1.91
   4  -4   9    5.17    1.31
   4   4   9    3.38    1.05
  -4  -4  -9    5.37    1.63
   4  -4   9    5.14    1.36
   4  -4   9    5.62    3.28
  -4  -4  -9    5.58    2.48
   4  -4  10    6.97    3.07
   4  -4  10    9.01    1.24
   4   4  10    7.98    1.45
  -4  -4 -10    7.40    2.48
   4  -4  10    8.03    1.21
   4  -4  10    6.61    2.28
   4   4  10    4.78    1.30
  -4  -4 -10    9.44    2.87
   4  -4  11    5.14    1.09
   4   4  11    6.66    1.24
  -4  -4 -11    9.18    2.35
   4  -4  11    6.00    1.45
   4  -4  11    8.05    1.83
   4   4  11    6.38    1.97
  -4  -4 -11    6.26    2.83
   4  -4  12   18.55    2.18
   4   4  12   14.84    1.96
  -4  -4 -12   18.94    2.55
   4  -4  12   15.92    1.89
   4   4  12   18.29    2.38
  -4  -4 -12   23.28    3.33
   4  -4  13    4.59    1.18
   4   4  13    4.55    1.13
   4  -4  13    7.36    1.30
   4  -4  13    2.10    1.75
   4   4  13    4.40    1.80
  -4  -4 -13    1.51    2.84
   4  -4  14   45.71    3.24
   4   4  14   35.95    2.97
   4  -4  14   39.42    3.19
   4  -4  14   28.49    3.55
   4   4  14   35.36    3.37
  -4  -4 -14   46.55    5.38
   4  -4  15   13.80    1.99
   4   4  15   18.05    2.29
   4  -4  15   23.94    3.60
   4   4  15   13.53    2.06
  -4  -4 -15   15.62    3.14
   4  -4  16    1.22    1.14
   4   4  16    1.12    1.20
   4  -4  16    1.54    1.84
   4   4  16    2.66    1.68
  -4  -4 -16    0.85    2.22
   4  -4  17    0.33    1.13
   4   4  17    0.20    1.33
   4  -4  17   -0.13    1.82
   4   4  17   -0.20    1.59
   4  -4  18    0.98    1.25
   4   4  18    3.22    1.27
   4  -4  18    2.83    2.56
   4   4  18    0.17    3.11
  -4   4 -18    3.46    2.19
   4  -4  19   -1.20    1.64
   4   4  19    0.42    1.40
   4  -4  19    0.61    1.91
   4  -4  20    0.04    1.58
   4  -4  20   -1.15    2.39
   4  -4  21    4.63    1.54
   4  -4  21   -2.17    2.12
  -4   5  23    2.69    1.36
  -4  -5  22   -0.32    1.51
  -4   5  22    2.07    1.49
  -4   5  22    0.23    1.80
   4  -5 -22   -2.11    2.72
  -4  -5  21   -0.15    1.22
  -4   5  21   -0.33    1.23
  -4   5  21    1.45    1.51
   4  -5 -21   -3.02    2.69
  -4  -5  20    0.08    1.57
  -4   5  20    0.89    1.54
  -4   5  20    2.91    1.40
   4  -5 -20   -0.69    2.63
  -4  -5  19   -0.69    1.10
  -4   5  19    0.30    1.25
  -4  -5  19    1.43    1.62
  -4   5  19   -4.15    1.60
  -4  -5  18   13.91    2.00
  -4   5  18   14.76    2.32
  -4   5  18   12.61    2.18
   4  -5 -18    4.10    2.80
  -4  -5  17    1.14    1.12
  -4   5  17    0.14    1.70
  -4  -5  17   -0.42    1.30
  -4   5  17   -2.06    1.80
   4  -5 -17   -1.66    1.83
  -4  -5  16    1.60    1.44
  -4   5  16    0.95    1.24
  -4  -5  16   -2.49    1.57
  -4   5  16    0.74    1.48
   4  -5 -16    1.63    1.64
  -4  -5  15   26.74    2.90
  -4   5  15   22.44    2.68
  -4  -5  15   23.72    3.03
  -4   5  15   27.05    3.00
   4  -5 -15   24.98    3.49
   4  -5 -15   25.46    3.10
  -4  -5  14   32.39    2.82
  -4   5  14   27.37    2.80
  -4   5  14   26.71    3.19
   4  -5 -14   25.37    3.00
  -4  -5  14   28.00    2.69
  -4   5  14   31.21    2.74
   4  -5 -14   37.64    3.27
   4  -5 -14   33.92    2.63
  -4  -5  13    2.16    0.98
  -4   5  13    1.91    1.15
  -4   5  13    0.35    2.47
   4  -5 -13    2.43    1.99
  -4  -5  13    2.38    1.48
  -4   5  13    1.86    1.00
   4  -5 -13    7.01    1.54
   4  -5 -13    1.87    1.89
  -4   5  12   87.45    7.58
  -4  -5  12  102.34    7.69
  -4   5  12  105.86    7.89
  -4  -5  12   81.66    7.70
   4  -5 -12   94.36   10.12
  -4  -5  12   81.47    6.38
  -4   5  12  100.26    7.52
   4  -5 -12  104.27    8.10
   4  -5 -12  113.02    8.65
  -4   5  11    5.89    2.40
  -4  -5  11    8.05    2.01
   4  -5 -11    3.67    1.67
  -4   5  11    6.49    1.13
   4  -5 -11    6.53    1.76
   4  -5 -11    7.38    1.47
  -4   5  10   14.87    3.38
   4  -5 -10   17.52    2.29
  -4  -5  10   14.23    1.37
  -4  -5  10   14.02    2.96
   4  -5 -10   13.45    1.85
  -4   5  10   13.37    1.33
   4  -5 -10   17.72    1.81
   4  -5 -10   18.29    2.03
   4  -5 -10   22.08    2.14
  -4   5   9   52.95    4.06
   4  -5  -9   71.65    3.93
  -4  -5   9   61.93    3.28
   4  -5  -9   73.46    4.28
  -4   5   9   57.45    3.15
   4  -5  -9   69.83    4.33
  -4  -5   8    5.19    1.94
  -4   5   8    3.96    2.39
   4  -5  -8    4.30    1.23
  -4  -5   8    3.98    0.99
   4  -5  -8    3.65    1.49
  -4   5   8    4.89    1.20
   4  -5  -8    5.78    1.91
   4  -5  -8    5.69    1.20
  -4  -5   7    9.24    2.05
  -4   5   7    8.47    2.01
   4  -5  -7    6.33    1.34
   4  -5  -7    6.95    1.64
   4  -5  -7   14.02    2.13
   4  -5  -7    7.11    1.49
  -4   5   6  141.02    6.80
   4   5  -6  114.58    6.32
   4  -5  -6  140.85    5.78
   4  -5  -6  127.47    5.18
   4  -5  -6  138.45    5.80
   4   5  -5  166.07    7.80
  -4   5   5  197.60    8.43
   4   5  -5  195.27    9.00
   4  -5  -5  162.95    7.18
   4  -5  -5  194.74    7.20
   4  -5  -5  199.56    7.32
   4   5  -4  169.87    7.08
   4   5  -4  189.64    8.72
  -4   5   4  201.85    8.54
   4  -5  -4  201.88    7.43
   4  -5  -4  211.41    7.76
   4  -5  -4  185.47    4.71
   4   5  -3   20.94    2.34
   4   5  -3   25.22    2.54
  -4   5   3   25.48    2.72
   4  -5  -3   27.01    2.05
   4   5  -2   30.42    2.74
   4   5  -2   36.51    2.95
  -4   5   2   44.69    3.40
   4  -5  -1    0.92    1.60
   4   5  -1    0.64    1.51
   4   5  -1    1.50    1.47
   4  -5   0   78.92    5.37
   4   5   0   57.85    3.56
   4   5   0   76.67    5.25
   4  -5   0   73.16    4.00
   4  -5   0   78.87    4.28
   4  -5   1    1.14    1.72
   4   5   1    0.77    1.89
   4   5   1    0.49    1.33
   4  -5   1    0.52    0.87
   4  -5   1    1.42    0.91
   4  -5   2    3.42    2.45
   4   5   2    1.16    1.37
   4  -5   2    1.55    1.25
  -4  -5  -2    1.29    1.20
   4  -5   2    1.24    1.16
   4  -5   3   27.54    2.83
   4   5   3   26.15    3.21
   4  -5   3   24.20    1.78
  -4  -5  -3   30.02    2.34
   4  -5   3   30.08    1.99
  -4  -5  -3   24.94    2.32
   4  -5   4  191.83    8.36
   4   5   4  196.93    8.91
   4  -5   4  208.19    7.49
  -4  -5  -4  206.50    8.24
   4  -5   4  197.04    7.08
   4  -5   4  195.78    8.14
  -4  -5  -4  225.93   11.81
  -4  -5  -4  208.59    8.31
   4  -5   5   30.75    3.67
   4  -5   5   31.44    2.70
  -4  -5  -5   27.29    2.74
   4  -5   5   32.09    2.59
   4  -5   5   27.61    2.80
  -4  -5  -5   35.28    3.73
   4  -5   6   44.02    4.09
   4  -5   6   46.28    3.41
  -4  -5  -6   42.51    4.03
   4  -5   6   47.15    3.50
   4  -5   6   33.41    3.93
  -4  -5  -6   60.30    4.70
   4  -5   7   13.76    2.36
   4  -5   7   17.07    1.71
  -4  -5  -7   13.56    1.79
   4  -5   7   15.69    1.71
   4  -5   7   14.90    2.00
  -4  -5  -7   19.18    2.57
   4  -5   8   25.88    3.74
   4  -5   8   26.04    2.35
   4   5   8   31.71    2.96
  -4  -5  -8   46.90    4.10
   4  -5   8   44.58    3.57
   4  -5   8   43.57    4.74
  -4  -5  -8   39.21    5.13
   4  -5   9    3.06    3.01
   4  -5   9    1.80    1.01
   4   5   9    0.57    1.17
  -4  -5  -9   -0.02    2.01
   4  -5   9    0.29    1.04
   4  -5   9    1.91    2.31
  -4  -5  -9   -1.29    1.91
   4  -5  10    3.02    1.02
   4   5  10    1.10    1.45
  -4  -5 -10    1.41    2.01
   4  -5  10    1.13    1.76
   4  -5  10   -0.57    1.52
  -4  -5 -10    1.03    1.84
   4  -5  11    9.04    1.28
   4   5  11    7.23    1.25
  -4  -5 -11    8.51    1.89
   4  -5  11    9.84    1.57
   4  -5  11    4.76    1.75
  -4  -5 -11    4.64    2.11
   4  -5  12   11.64    1.61
   4   5  12    7.44    1.40
  -4  -5 -12   10.81    2.20
   4  -5  12   12.64    1.71
   4  -5  12    6.71    2.32
  -4  -5 -12    9.16    2.98
   4  -5  13    1.33    1.57
   4   5  13    0.09    1.37
  -4  -5 -13   -0.33    1.78
   4  -5  13   -0.37    1.27
   4  -5  13    2.16    1.78
  -4  -5 -13    0.00    2.00
   4  -5  14   10.28    1.84
   4   5  14    5.00    1.67
   4  -5  14    3.29    2.29
  -4  -5 -14   -0.58    3.70
   4  -5  15    0.31    1.50
   4   5  15   -0.09    1.34
   4  -5  15   -1.25    1.70
  -4  -5 -15   -0.98    2.27
   4  -5  16    2.08    1.24
   4   5  16    2.45    1.50
   4  -5  16    0.66    2.74
  -4  -5 -16    1.24    2.22
   4  -5  17    1.73    1.81
   4   5  17    0.45    1.15
   4  -5  17    0.00    2.38
   4  -5  18    2.29    1.44
   4  -5  18    0.61    2.56
   4  -5  19   12.14    2.15
   4  -5  19    3.63    2.82
   4  -5  20   -1.78    1.41
   4  -5  20   -1.10    2.41
   4  -5  21    0.23    1.59
  -4  -6  22    1.56    2.47
  -4   6  22    1.22    1.50
   4  -6 -22   -0.19    2.81
  -4  -6  21    1.99    1.60
  -4   6  21   -0.35    1.67
  -4   6  21    0.48    2.46
   4  -6 -21   -0.24    2.78
  -4  -6  20    2.26    1.68
  -4   6  20   -0.36    1.23
  -4   6  20   -0.42    1.61
   4  -6 -20    3.12    2.47
  -4  -6  19   -3.25    1.52
  -4   6  19    3.81    1.61
  -4   6  19   -0.01    2.04
   4  -6 -19   -2.88    2.45
  -4  -6  18   12.23    2.07
  -4   6  18    9.20    1.56
  -4   6  18    9.06    1.97
   4  -6 -18    4.37    2.10
  -4  -6  17   11.58    1.79
  -4   6  17   16.29    2.31
  -4   6  17   16.05    2.40
   4  -6 -17   12.90    3.11
  -4  -6  16   18.13    2.42
  -4   6  16   20.30    2.58
  -4   6  16   18.12    2.39
   4  -6 -16   16.92    3.60
  -4  -6  15   52.41    3.61
  -4   6  15   54.64    3.97
   4  -6 -15   39.24    4.24
  -4   6  15   47.14    3.46
   4  -6 -15   52.77    4.71
   4  -6 -15   58.20    4.22
  -4  -6  14   25.46    2.93
  -4   6  14   30.21    2.06
   4  -6 -14   21.34    3.20
  -4   6  14   25.99    3.04
   4  -6 -14   36.61    3.23
   4  -6 -14   34.86    2.81
  -4  -6  13   12.68    1.35
  -4   6  13   10.44    1.49
   4  -6 -13   12.57    2.01
  -4   6  13   10.73    1.68
   4  -6 -13   14.57    1.93
   4  -6 -13   10.89    1.76
  -4  -6  12   17.86    2.17
  -4   6  12   15.09    1.89
   4  -6 -12   14.68    2.08
  -4   6  12   11.65    1.48
   4  -6 -12   17.70    2.42
  -4  -6  11    0.14    1.29
   4  -6 -11    1.47    1.70
  -4   6  11   -0.04    1.24
   4  -6 -11   -0.42    1.26
   4  -6 -11   -2.63    1.74
  -4   6  10   10.27    3.08
   4  -6 -10   15.85    2.33
  -4  -6  10   14.20    1.88
   4  -6 -10   10.22    1.50
  -4   6  10   10.91    1.44
   4  -6 -10   14.32    2.07
   4  -6 -10    9.94    1.98
   4  -6 -10   15.74    2.33
  -4   6   9    0.49    1.81
   4  -6  -9    2.56    1.63
  -4  -6   9    0.41    1.03
   4  -6  -9    1.41    1.64
  -4   6   9    0.60    0.86
   4  -6  -9    0.04    1.42
   4  -6  -9   -1.18    1.26
   4  -6  -9    2.83    1.57
  -4   6   8   51.85    3.70
   4  -6  -8   57.72    3.16
  -4  -6   8   48.51    2.69
   4  -6  -8   52.05    3.29
  -4   6   8   45.02    3.06
   4  -6  -8   54.94    3.09
   4  -6  -8   39.73    2.45
  -4   6   7   13.95    2.73
   4  -6  -7   16.42    1.85
  -4  -6   7   17.30    1.70
   4  -6  -7   18.05    1.82
  -4   6   7   14.16    1.68
   4  -6  -7   23.25    2.79
   4  -6  -7   16.51    1.81
  -4   6   6   33.51    3.88
   4  -6  -6   38.09    3.12
   4  -6  -6   36.45    3.01
  -4   6   6   24.44    2.25
   4  -6  -6   34.30    2.74
  -4   6   5    9.58    2.13
   4  -6  -5   11.05    1.50
   4  -6  -5   14.13    1.68
   4  -6  -5   12.71    2.39
   4   6  -4   26.74    2.87
  -4   6   4   27.14    3.17
   4  -6  -4   29.11    2.76
   4  -6  -4   27.36    2.27
   4  -6  -4   30.56    2.12
   4   6  -3   14.98    2.20
  -4   6   3   18.70    2.50
   4  -6  -3   14.32    1.52
  -4  -6   3   13.13    1.67
   4  -6  -3   11.39    1.30
   4  -6  -3   14.60    1.38
   4   6  -2    1.74    1.84
   4  -6  -2    0.09    1.39
  -4  -6   2    0.73    1.31
   4  -6  -2    0.51    0.88
   4  -6  -2    0.91    0.79
   4   6  -1    0.13    1.73
  -4   6   1    4.23    1.85
   4  -6  -1    1.12    1.32
  -4  -6   1    0.32    1.38
   4  -6  -1    0.26    0.83
   4  -6   0   34.29    3.17
   4   6   0   29.20    3.10
   4  -6   0   32.20    2.25
  -4  -6   0   36.30    2.55
   4  -6   0   35.88    2.18
   4  -6   1    7.82    2.74
   4   6   1    5.85    2.42
   4  -6   1    5.57    1.08
  -4  -6  -1    7.46    1.37
   4  -6   1    5.99    1.39
  -4  -6  -1    9.53    1.52
   4  -6   2   12.74    2.32
   4   6   2   11.72    2.08
   4  -6   2   13.78    1.61
  -4  -6  -2   18.75    2.20
   4  -6   2   13.29    1.34
  -4  -6  -2   15.74    1.99
   4   6   3   -0.06    2.26
   4  -6   3    2.74    1.25
  -4  -6  -3    1.85    1.23
   4  -6   3    1.42    1.30
   4  -6   3    0.42    1.14
  -4  -6  -3    2.56    2.00
  -4  -6  -3    3.33    1.78
   4  -6   4   12.53    2.31
   4   6   4    5.97    2.54
   4  -6   4    9.49    1.48
  -4  -6  -4   11.21    2.13
   4  -6   4   11.07    1.52
   4  -6   4   11.05    1.96
  -4  -6  -4   12.80    2.38
   4  -6   5   14.80    2.53
   4   6   5   15.63    2.64
   4  -6   5   18.20    1.95
  -4  -6  -5   22.07    2.78
   4  -6   5   17.59    1.68
   4  -6   5    8.98    2.19
  -4  -6  -5   20.40    3.09
   4  -6   6   -0.53    2.10
   4   6   6   -0.56    1.77
   4  -6   6   -0.86    0.92
  -4  -6  -6    1.93    1.38
   4  -6   6    1.06    0.94
   4  -6   6    2.40    1.33
  -4  -6  -6   -0.76    1.72
   4  -6   7   38.79    4.16
   4   6   7   41.93    4.41
   4  -6   7   49.56    3.90
  -4  -6  -7   52.17    4.97
   4  -6   7   55.31    4.47
   4  -6   7   46.02    4.50
  -4  -6  -7   48.16    5.29
   4   6   8    4.33    2.77
   4  -6   8    8.03    1.37
  -4  -6  -8    5.81    1.62
   4  -6   8   11.18    1.28
   4  -6   8    4.10    1.77
  -4  -6  -8   12.44    3.75
   4  -6   9    5.16    1.43
  -4  -6  -9    6.16    2.11
   4  -6   9    7.34    1.36
   4  -6   9    5.22    1.68
  -4  -6  -9    6.84    2.13
   4  -6  10   -0.39    1.14
  -4  -6 -10    1.13    2.03
   4  -6  10    0.00    1.03
   4  -6  10   -2.01    1.81
  -4  -6 -10   -3.09    2.49
   4  -6  11    7.97    1.55
   4   6  11    4.09    1.18
  -4  -6 -11    5.50    1.88
   4  -6  11    5.62    1.23
   4  -6  11    3.97    1.73
  -4  -6 -11    2.46    2.77
   4  -6  12   11.53    1.94
   4   6  12    7.34    1.42
  -4  -6 -12    5.67    1.96
   4  -6  12    9.61    1.94
   4  -6  12    6.59    1.94
  -4  -6 -12    8.86    2.28
   4  -6  13   20.90    2.50
   4   6  13   17.04    2.41
  -4  -6 -13   17.50    3.03
   4  -6  13   15.83    2.45
   4  -6  13   11.71    4.02
  -4  -6 -13   10.42    2.85
   4  -6  14    5.57    1.54
   4  -6  14    0.86    1.77
  -4  -6 -14    2.41    2.38
   4  -6  15    2.10    1.53
   4  -6  15    7.18    2.55
  -4  -6 -15    5.57    3.36
   4  -6  16    0.55    1.22
   4  -6  16    3.54    1.94
  -4  -6 -16   -1.41    3.11
   4  -6  17    0.38    1.25
   4  -6  17    0.70    1.83
   4  -6  18    0.18    1.21
   4  -6  18    0.24    2.35
   4  -6  19    1.01    1.53
   4  -6  19   -2.66    2.79
  -4   6 -19    0.46    2.41
   4  -6  20    0.97    1.31
  -4   7  22    1.66    1.57
   4  -7 -22   -1.36    3.08
  -4  -7  21    0.80    2.22
  -4   7  21    2.95    1.49
   4  -7 -21    1.93    2.84
  -4  -7  20   -1.60    1.84
  -4   7  20   -0.30    1.59
   4  -7 -20    2.57    2.73
  -4   7  19   -0.68    1.63
   4  -7 -19    0.61    2.13
  -4  -7  18    1.21    1.80
  -4   7  18    4.86    1.68
   4  -7 -18    1.62    2.05
  -4  -7  17    7.28    1.68
  -4   7  17    8.65    1.95
   4  -7 -17   -0.98    2.06
  -4  -7  16    0.59    1.52
  -4   7  16    0.54    1.26
   4  -7 -16    0.98    2.06
   4  -7 -16    2.06    2.92
  -4  -7  15   38.15    2.88
  -4   7  15   39.16    3.09
   4  -7 -15   30.54    4.19
  -4   7  15   34.64    2.90
   4  -7 -15   41.11    4.64
  -4  -7  14   55.71    4.25
  -4   7  14   56.70    4.34
   4  -7 -14   45.63    4.64
  -4   7  14   55.84    4.36
   4  -7 -14   63.93    6.06
   4  -7 -14   62.20    5.50
  -4  -7  13    2.13    1.50
  -4   7  13    2.49    1.66
  -4   7  13    1.39    1.27
   4  -7 -13    0.02    2.07
   4  -7 -13    3.83    1.62
  -4  -7  12    0.20    1.29
  -4   7  12    0.88    1.18
   4  -7 -12    0.58    1.35
  -4   7  12   -0.33    1.65
   4  -7 -12   -1.29    1.78
   4  -7 -12    0.15    1.44
  -4  -7  11   -1.02    1.14
   4  -7 -11    0.78    1.33
   4  -7 -11   -0.84    1.34
   4  -7 -11   -0.56    1.96
   4  -7 -10    8.90    1.81
  -4  -7  10    7.85    1.50
   4  -7 -10    6.37    1.49
   4  -7 -10    7.86    1.55
   4  -7 -10    8.36    1.70
   4  -7 -10    8.27    1.69
   4  -7  -9    2.30    1.28
  -4  -7   9    1.33    0.94
   4  -7  -9    0.38    1.28
   4  -7  -9    3.65    1.25
   4  -7  -9   -1.16    1.31
   4  -7  -9    0.72    1.28
  -4   7   8   35.38    4.03
   4  -7  -8   39.93    3.53
  -4  -7   8   36.01    3.11
   4  -7  -8   43.00    3.71
   4  -7  -8   45.36    3.97
   4  -7  -8   41.89    4.12
   4  -7  -8   42.97    3.90
  -4   7   7   31.79    4.32
   4  -7  -7   32.95    2.23
   4  -7  -7   28.86    2.68
   4  -7  -7   35.04    3.28
   4  -7  -7   38.76    3.78
   4  -7  -7   34.01    2.46
  -4   7   6   41.06    4.31
   4  -7  -6   43.71    3.72
   4  -7  -6   50.82    4.17
   4  -7  -6   56.27    4.43
  -4   7   5    1.70    2.70
   4  -7  -5    4.44    1.32
  -4  -7   5    3.92    1.68
   4  -7  -5    4.87    1.21
   4  -7  -5    6.07    1.40
  -4   7   4    1.31    1.87
   4  -7  -4    2.97    1.35
  -4  -7   4    2.13    1.09
   4  -7  -4    1.35    1.10
   4  -7  -4    0.15    1.30
  -4   7   3    1.69    2.58
   4  -7  -3    2.47    1.19
  -4  -7   3    7.45    1.60
   4  -7  -3    3.73    1.19
   4  -7  -3    6.66    1.08
  -4   7   2   28.06    3.22
   4  -7  -2   25.01    2.46
  -4  -7   2   21.10    2.36
   4  -7  -2   25.43    2.24
   4  -7  -2   24.29    2.06
  -4   7   1   41.15    4.03
   4  -7  -1   46.92    2.54
  -4  -7   1   47.34    2.88
   4  -7  -1   46.38    2.51
   4  -7  -1   42.01    2.19
   4  -7   0    0.11    0.99
  -4  -7   0   -0.80    1.16
   4  -7   0    0.88    1.19
   4  -7   0    1.45    1.11
   4  -7   1   31.56    3.70
   4   7   1   24.15    2.94
   4  -7   1   32.83    2.51
  -4  -7  -1   36.19    2.26
   4  -7   1   32.24    2.45
   4  -7   1   37.26    2.08
   4  -7   2   22.50    3.34
   4   7   2   18.37    2.82
   4  -7   2   23.54    2.18
   4  -7   2   25.38    2.06
  -4  -7  -2   26.99    3.26
   4  -7   3   51.55    4.95
   4   7   3   38.79    4.34
   4  -7   3   54.53    4.20
  -4  -7  -3   59.20    5.05
   4  -7   3   61.64    4.66
  -4  -7  -3   55.72    6.15
  -4  -7  -3   61.88    5.09
   4  -7   4   46.78    4.78
   4   7   4   39.61    4.73
   4  -7   4   51.33    3.99
  -4  -7  -4   59.00    5.14
   4  -7   4   53.52    4.26
  -4  -7  -4   56.75    5.81
  -4  -7  -4   61.79    4.97
   4  -7   5   -0.23    3.48
   4   7   5    1.69    2.74
   4  -7   5    4.95    1.14
  -4  -7  -5    2.74    2.00
   4  -7   5    4.03    1.04
   4  -7   5    2.13    1.53
  -4  -7  -5    3.59    2.30
   4  -7   6    2.31    3.30
   4   7   6    1.41    3.06
   4  -7   6   -0.23    0.97
  -4  -7  -6    0.18    1.87
   4  -7   6    1.07    1.24
   4  -7   6    0.53    1.29
  -4  -7  -6    1.26    1.80
   4  -7   7    1.02    1.03
  -4  -7  -7   -2.15    1.37
   4  -7   7    0.81    1.01
   4  -7   7    0.70    1.97
  -4  -7  -7    2.02    1.88
   4  -7   8    1.00    1.04
  -4  -7  -8    0.80    2.06
   4  -7   8    6.00    1.77
   4  -7   8    3.86    2.17
  -4  -7  -8    3.79    2.03
   4  -7   9    2.11    1.40
  -4  -7  -9    0.22    1.68
   4  -7   9    3.17    1.23
   4  -7   9    1.14    1.54
  -4  -7  -9    6.62    2.83
   4  -7  10   -0.12    1.17
  -4  -7 -10   -1.48    2.58
   4  -7  10    1.22    1.95
   4  -7  10    0.53    2.26
  -4  -7 -10   -3.99    2.61
   4  -7  11    2.05    1.45
  -4  -7 -11    6.54    1.94
   4  -7  11    3.22    1.39
   4  -7  11    3.63    1.76
  -4  -7 -11    2.48    2.30
   4  -7  12   12.02    1.78
  -4  -7 -12    2.69    1.87
   4  -7  12    6.96    2.19
  -4  -7 -12   -0.68    2.92
   4  -7  13   10.24    1.46
  -4  -7 -13   14.49    2.45
   4  -7  13    2.04    2.11
  -4  -7 -13   12.84    4.36
   4  -7  14   17.17    2.10
   4  -7  14    5.21    2.32
  -4  -7 -14   17.81    3.48
   4  -7  15    6.50    1.82
   4  -7  15    3.10    2.23
  -4  -7 -15    5.18    2.55
   4  -7  16    2.97    1.29
   4  -7  16   -2.22    2.13
  -4  -7 -16   -0.55    2.37
   4  -7  17    0.63    1.62
   4  -7  17    0.44    2.63
   4  -7  18   -1.03    1.38
   4  -7  18   -0.11    3.75
  -4   7 -18   -1.04    1.86
   4  -7  19    3.10    1.57
   4  -8 -21    2.14    3.22
  -4   8  20   -1.03    1.38
   4  -8 -20   -0.47    2.78
   4  -8 -19   -1.84    2.22
  -4  -8  18    7.09    2.18
   4  -8 -18    5.19    2.35
  -4  -8  17    1.38    1.37
  -4   8  17    2.70    1.61
   4  -8 -17    1.26    2.16
  -4  -8  16    1.01    1.77
  -4   8  16    0.12    1.48
   4  -8 -16   -0.80    2.45
  -4  -8  15    0.67    1.60
  -4   8  15    3.55    1.83
   4  -8 -15    1.05    1.70
   4  -8 -15    2.22    2.02
  -4  -8  14   -0.19    1.42
  -4   8  14    1.28    1.33
   4  -8 -14   -1.60    1.90
   4  -8 -14   -3.08    1.86
   4  -8 -14   -0.27    1.75
  -4  -8  13   16.79    2.33
  -4   8  13   18.51    2.72
   4  -8 -13   17.83    2.58
   4  -8 -13   23.30    4.13
   4  -8 -13   22.47    3.32
  -4  -8  12    2.63    1.24
  -4   8  12    2.92    1.29
   4  -8 -12    1.96    1.67
   4  -8 -12    5.30    1.72
   4  -8 -12    1.51    1.58
  -4  -8  11    7.98    1.58
   4  -8 -11    9.92    1.72
   4  -8 -11    9.05    1.74
   4  -8 -11    9.78    2.12
   4  -8 -10    4.67    1.49
  -4  -8  10    0.37    1.56
   4  -8 -10   -0.31    1.87
   4  -8 -10   -0.20    1.93
   4  -8 -10    4.28    1.55
   4  -8 -10    1.99    1.51
   4  -8  -9   76.08    4.31
   4  -8  -9   81.79    4.26
   4  -8  -9   66.26    4.02
   4  -8  -9   86.59    5.01
   4  -8  -9   78.07    5.20
   4  -8  -8   24.54    2.49
   4  -8  -8   22.89    2.49
   4  -8  -8   25.65    3.24
   4  -8  -8   20.64    3.26
   4  -8  -8   19.78    2.32
   4  -8  -7    9.74    1.92
   4  -8  -7   11.12    1.58
   4  -8  -7    9.37    2.16
   4  -8  -7   11.93    1.69
   4  -8  -6    0.84    1.91
  -4  -8   6    1.64    1.26
   4  -8  -6   -0.73    1.23
   4  -8  -6    0.73    1.14
   4  -8  -6    1.79    1.61
   4  -8  -6    2.04    1.49
   4  -8  -5   43.16    3.78
  -4  -8   5   43.54    4.11
   4  -8  -5   39.77    3.47
   4  -8  -5   42.83    3.91
   4  -8  -5   41.04    3.75
   4  -8  -4    2.82    1.66
  -4  -8   4    5.90    1.74
   4  -8  -4    4.47    1.96
   4  -8  -4    1.76    1.13
  -4   8   3    8.88    2.58
   4  -8  -3   13.50    1.82
  -4  -8   3   12.54    1.71
   4  -8  -3   11.29    1.48
   4  -8  -3   14.54    1.63
  -4   8   2   40.01    4.50
   4  -8  -2   55.81    4.73
  -4  -8   2   58.49    5.01
   4  -8  -2   51.07    4.26
   4  -8  -2   48.10    4.00
  -4   8   1    1.22    3.21
   4  -8  -1    1.62    1.51
  -4  -8   1    3.18    3.31
   4  -8  -1   -0.23    1.07
   4  -8  -1    0.30    0.86
  -4   8   0   13.12    3.41
   4  -8   0   10.83    1.79
  -4  -8   0    8.13    2.29
   4  -8   0    9.16    1.75
  -4  -8   0    6.75    3.68
   4  -8   0    9.07    1.46
  -4   8  -1    0.52    2.36
   4  -8   1    1.75    1.41
  -4  -8  -1    2.04    1.65
   4  -8   1    0.08    1.01
  -4  -8  -1    0.55    1.30
   4  -8   1    0.86    0.82
   4  -8   2    0.87    1.04
  -4  -8  -2    0.64    1.39
   4  -8   2    0.29    0.95
  -4  -8  -2    0.24    1.32
   4  -8   2   -0.77    1.15
   4  -8   3   37.44    2.52
  -4  -8  -3   34.81    2.82
   4  -8   3   34.83    2.60
  -4  -8  -3   31.25    4.38
  -4  -8  -3   32.48    2.61
   4  -8   4   28.57    2.31
  -4  -8  -4   31.18    3.03
   4  -8   4   29.64    2.12
  -4  -8  -4   23.82    4.00
  -4  -8  -4   38.23    3.18
   4  -8   5    2.69    1.14
  -4  -8  -5    2.32    2.08
   4  -8   5    2.39    1.22
  -4  -8  -5    2.59    1.92
   4  -8   6   -2.06    1.02
  -4  -8  -6    1.31    2.18
   4  -8   6    1.26    1.04
  -4  -8  -6    1.13    1.86
   4  -8   7    8.37    1.33
  -4  -8  -7    7.27    2.28
   4  -8   7    9.57    1.43
  -4  -8  -7    9.18    2.57
   4  -8   8    3.53    1.17
  -4  -8  -8    0.26    1.53
   4  -8   8    1.06    1.15
  -4  -8  -8    4.73    2.16
   4  -8   9   17.69    2.37
  -4  -8  -9   13.67    2.53
   4  -8   9   16.60    2.31
   4  -8   9    9.83    2.53
  -4  -8  -9    8.02    2.98
   4  -8  10    8.45    1.42
  -4  -8 -10   10.85    2.63
   4  -8  10   10.91    1.53
   4  -8  10    3.07    2.57
  -4  -8 -10    6.79    2.48
   4  -8  11   -2.59    1.45
  -4  -8 -11    1.34    2.23
   4  -8  11    0.63    1.70
   4  -8  11    0.63    2.01
  -4  -8 -11    0.65    2.96
   4  -8  12    3.73    1.69
  -4  -8 -12    3.75    1.93
   4  -8  12    1.59    2.08
  -4  -8 -12    4.76    2.90
   4  -8  13    8.59    1.38
  -4  -8 -13    5.50    2.11
   4  -8  13    1.20    2.96
  -4  -8 -13    6.16    2.67
   4  -8  14    2.98    1.70
   4  -8  14   -1.50    3.27
  -4  -8 -14    2.87    3.25
   4  -8  15   -0.05    1.49
  -4  -8 -15    0.85    2.94
   4  -8  16   -0.89    1.42
   4  -8  17    2.32    1.37
  -4   8 -17   -1.29    1.94
  -4   8 -18    1.40    2.14
   4  -9 -20    0.92    3.36
  -4   9  19    0.53    1.94
   4  -9 -19   -1.56    2.80
  -4   9  18    5.33    1.90
   4  -9 -18    1.46    2.50
  -4   9  17    1.31    1.48
   4  -9 -17    3.68    2.19
  -4   9  16    5.87    2.03
   4  -9 -16   10.77    3.26
   4  -9 -16    0.59    2.79
  -4   9  15   10.21    2.19
   4  -9 -15    2.44    2.37
   4  -9 -15    0.46    2.64
  -4   9  14   -1.26    1.28
   4  -9 -14    1.10    1.70
   4  -9 -14    0.77    1.92
  -4   9  13   -2.67    1.84
   4  -9 -13   -0.60    2.43
   4  -9 -13    1.72    1.99
   4  -9 -12    1.40    2.42
   4  -9 -12    1.09    2.05
  -4   9  11    5.05    1.97
   4  -9 -11    3.24    2.22
   4  -9 -11    0.06    1.83
   4  -9 -11    1.54    1.52
   4  -9 -10    5.23    1.62
   4  -9 -10    5.57    1.62
   4  -9 -10    5.48    2.18
   4  -9 -10    2.55    1.66
   4  -9  -9    7.28    2.24
   4  -9  -9    6.65    1.63
   4  -9  -9    5.19    1.54
   4  -9  -9   10.44    2.51
   4  -9  -9    6.98    1.66
   4  -9  -8   16.17    2.57
   4  -9  -8   12.98    2.09
   4  -9  -8   15.67    2.30
   4  -9  -8   12.47    2.22
   4  -9  -8   19.30    2.41
   4  -9  -7    1.32    1.35
   4  -9  -7   -2.41    1.74
   4  -9  -7   -1.41    1.30
   4  -9  -7   -0.45    1.58
   4  -9  -7   -0.11    1.33
   4  -9  -6   -1.27    1.67
  -4  -9   6    2.70    1.99
   4  -9  -6   -0.44    1.29
   4  -9  -6    3.01    1.65
   4  -9  -6    2.87    1.60
   4  -9  -6    0.71    1.31
   4  -9  -5    2.21    1.87
  -4  -9   5    2.23    1.32
   4  -9  -5   -0.11    1.80
   4  -9  -5    2.14    1.60
   4  -9  -5    1.59    1.79
   4  -9  -5    1.38    1.26
   4  -9  -4    0.92    1.47
  -4  -9   4    2.15    1.92
   4  -9  -4    0.54    1.31
   4  -9  -4    1.85    1.65
   4  -9  -4    6.79    1.78
   4  -9  -3   19.76    2.30
  -4  -9   3   24.24    2.86
   4  -9  -3   18.90    2.11
   4  -9  -3   21.01    2.43
   4  -9  -3   21.32    2.20
   4  -9  -2    4.80    1.46
  -4  -9   2    6.72    1.55
   4  -9  -2    5.21    1.84
   4  -9  -2    3.58    1.55
   4  -9  -1    0.34    1.74
  -4  -9   1    1.95    1.94
   4  -9  -1    0.30    1.12
  -4  -9   1   -0.12    1.58
   4  -9  -1    0.75    1.10
   4  -9   0    0.11    1.17
  -4  -9   0    0.13    1.88
   4  -9   0   -0.16    1.47
  -4  -9   0    4.81    2.07
   4  -9   0   -0.64    0.99
   4  -9   1    0.29    1.66
  -4  -9  -1   -1.32    1.84
   4  -9   1    1.08    1.48
  -4  -9  -1    0.01    1.35
   4  -9   2    9.39    1.75
  -4  -9  -2    9.36    2.31
   4  -9   2   12.49    1.51
  -4  -9  -2   13.67    2.26
   4  -9   3   -1.56    1.51
  -4  -9  -3    0.31    1.58
   4  -9   3    0.11    2.22
  -4  -9  -3   -1.47    1.32
   4  -9   4    6.81    1.36
  -4  -9  -4    3.93    2.16
   4  -9   4    4.02    1.52
  -4  -9  -4    1.74    2.22
  -4  -9  -4    5.32    2.09
   4  -9   5   13.98    2.18
  -4  -9  -5   15.09    3.46
   4  -9   5   13.06    2.15
  -4  -9  -5   10.95    3.30
   4  -9   6   -0.43    1.16
  -4  -9  -6    0.57    1.58
   4  -9   6    0.88    1.13
  -4  -9  -6    5.24    3.02
   4  -9   7   -2.71    1.11
  -4  -9  -7   -1.15    1.59
   4  -9   7   -0.41    1.12
  -4  -9  -7    2.25    2.25
   4  -9   8   43.47    2.94
  -4  -9  -8   54.91    4.08
   4  -9   8   54.52    3.51
  -4  -9  -8   29.14    5.35
   4  -9   9    0.26    1.14
  -4  -9  -9    6.39    2.32
   4  -9   9    0.46    1.81
  -4  -9  -9    0.06    2.30
   4  -9  10   -0.06    1.70
  -4  -9 -10    1.30    1.77
   4  -9  10    1.51    1.50
  -4  -9 -10    2.96    3.10
   4  -9  11    6.99    1.41
  -4  -9 -11    4.08    2.42
   4  -9  11    7.16    1.93
  -4  -9 -11   -1.45    2.94
   4  -9  12    0.38    1.17
  -4  -9 -12    1.82    2.40
  -4  -9 -12    3.24    3.06
   4  -9  13    6.25    1.92
  -4  -9 -13    3.91    2.47
  -4  -9 -13    4.03    4.35
   4  -9  14   -1.46    1.52
   4  -9  15    0.17    2.75
   4  -9  16   -0.10    1.60
  -4   9 -16    1.39    2.11
  -4   9 -17    1.75    2.03
  -4  10  17    4.80    2.74
   4 -10 -17    3.10    2.99
  -4  10  16   -0.67    1.60
   4 -10 -16   -2.01    3.19
  -4  10  15    2.03    1.78
   4 -10 -15    2.66    2.44
   4 -10 -15    2.67    3.16
  -4  10  14    5.63    1.77
   4 -10 -14    8.58    3.08
   4 -10 -14    2.42    2.65
  -4  10  13    3.80    1.98
   4 -10 -13    2.94    2.43
   4 -10 -13    0.79    2.60
  -4  10  12    1.49    1.34
   4 -10 -12    2.26    1.68
   4 -10 -12   -0.83    1.93
  -4  10  11   -1.65    2.10
   4 -10 -11   -0.35    2.37
   4 -10 -11    0.14    1.60
  -4  10  10    3.78    1.87
   4 -10 -10    4.58    2.25
   4 -10 -10    4.35    2.46
   4 -10 -10    7.28    2.23
   4 -10  -9   12.55    2.03
   4 -10  -9   13.44    2.42
   4 -10  -9   11.82    2.99
   4 -10  -9   15.73    2.27
   4 -10  -9   16.49    2.30
   4 -10  -8    2.88    1.47
   4 -10  -8   -0.77    1.54
   4 -10  -8    1.88    2.01
   4 -10  -8    0.17    1.55
   4 -10  -8    1.54    1.48
   4 -10  -7    8.62    1.90
   4 -10  -7    8.39    2.15
   4 -10  -7    2.50    1.62
   4 -10  -7    3.33    1.75
   4 -10  -7    2.57    2.00
   4 -10  -6   13.19    2.24
   4 -10  -6   13.40    2.04
   4 -10  -6   16.31    2.97
   4 -10  -6   14.79    2.95
   4 -10  -6   13.06    2.00
   4 -10  -5    6.72    1.94
  -4 -10   5    4.83    1.52
   4 -10  -5    9.54    1.85
   4 -10  -5    9.37    2.08
   4 -10  -5    8.64    1.94
   4 -10  -5    6.29    1.88
   4 -10  -4   57.78    4.63
  -4 -10   4   58.60    5.37
   4 -10  -4   62.01    4.87
   4 -10  -4   51.44    4.80
   4 -10  -4   67.56    5.47
   4 -10  -3    9.20    1.80
  -4 -10   3    7.27    1.87
   4 -10  -3   11.57    2.41
  -4 -10   3    8.88    1.87
   4 -10  -3   11.40    2.16
   4 -10  -2    0.62    2.13
  -4 -10   2   -0.64    1.41
   4 -10  -2   -0.14    1.36
   4 -10  -2    1.61    1.65
   4 -10  -1    0.26    1.41
  -4 -10   1    1.33    2.25
   4 -10  -1   -0.73    1.29
  -4 -10   1    1.38    1.91
   4 -10   0   40.46    3.58
  -4 -10   0   47.49    3.90
   4 -10   0   32.30    2.88
  -4 -10   0   46.32    4.12
   4 -10   1    5.52    1.88
  -4 -10  -1    2.58    1.65
   4 -10   1    3.28    1.46
  -4 -10  -1    3.59    2.00
   4 -10   2   10.31    1.96
  -4 -10  -2   13.25    2.27
   4 -10   2   15.61    2.38
  -4 -10  -2    9.82    1.85
   4 -10   3   14.59    1.72
  -4 -10  -3   17.82    2.65
   4 -10   3   19.86    2.98
  -4 -10  -3   14.12    2.13
   4 -10   4    7.85    1.75
  -4 -10  -4   10.55    1.94
   4 -10   4   14.23    2.33
   4 -10   5    2.95    1.60
  -4 -10  -5    4.31    2.14
   4 -10   5    4.09    1.32
   4 -10   6   -0.31    1.23
  -4 -10  -6    0.93    2.34
   4 -10   6    0.51    1.59
  -4 -10  -6   -1.40    2.86
   4 -10   7   -0.73    1.68
  -4 -10  -7   -1.55    2.21
   4 -10   7    2.08    1.71
  -4 -10  -7    1.94    2.40
   4 -10   8    4.58    1.66
  -4 -10  -8    8.97    2.51
   4 -10   8    6.54    2.03
  -4 -10  -8   -0.02    3.74
   4 -10   9    1.17    1.68
  -4 -10  -9   -2.08    2.53
   4 -10   9    2.50    2.12
  -4 -10  -9    3.84    3.15
   4 -10  10   19.89    2.04
  -4 -10 -10   18.67    2.55
   4 -10  10   16.81    2.38
  -4 -10 -10   12.01    3.58
   4 -10  11    7.23    1.75
  -4 -10 -11    4.76    2.62
  -4 -10 -11    1.07    3.40
   4 -10  12    3.36    1.51
   4 -10  13   -0.19    1.76
  -4 -10 -13    2.88    2.61
   4 -10  14    4.68    1.86
  -4  10 -14    1.45    1.79
   4 -10  15    2.19    2.05
  -4  10 -15   -3.51    1.85
   4 -11 -16    1.53    3.13
   4 -11 -15    0.83    3.43
   4 -11 -15    1.44    3.24
  -4  11  14    5.16    1.89
   4 -11 -14    4.05    2.55
   4 -11 -14    0.42    3.30
  -4  11  13    0.44    1.86
   4 -11 -13   -2.73    2.36
   4 -11 -13    3.65    3.03
  -4  11  12    3.15    1.63
   4 -11 -12    4.05    1.87
   4 -11 -12    3.32    2.27
  -4  11  11    1.03    1.61
   4 -11 -11   -1.53    2.73
   4 -11 -11    0.52    2.72
  -4  11  10   -0.02    1.45
   4 -11 -10    1.35    2.13
   4 -11 -10   -3.93    2.36
   4 -11  -9    2.86    1.71
   4 -11  -9    1.56    2.47
   4 -11  -9    1.55    1.97
   4 -11  -8    2.40    2.05
   4 -11  -8    5.22    2.09
   4 -11  -8    0.13    2.85
   4 -11  -8    2.61    1.71
   4 -11  -8    3.78    1.69
   4 -11  -7   -1.77    1.96
   4 -11  -7   -1.83    1.61
   4 -11  -7   -0.24    2.58
   4 -11  -7    1.45    1.59
  -4 -11   7    2.82    2.00
   4 -11  -7    0.16    2.27
   4 -11  -6   -2.96    1.89
   4 -11  -6    0.67    1.61
   4 -11  -6   -1.25    2.09
  -4 -11   6   -0.44    2.42
   4 -11  -6   -0.71    2.18
   4 -11  -5    2.39    1.88
  -4 -11   5   -0.88    1.95
   4 -11  -5    0.68    1.56
   4 -11  -5    0.48    1.93
  -4 -11   5    1.29    1.74
   4 -11  -5   -0.28    2.15
   4 -11  -4   -1.98    1.47
  -4 -11   4    3.43    1.75
   4 -11  -4    0.26    2.02
   4 -11  -4    0.38    1.64
  -4 -11   4    0.12    1.67
   4 -11  -4   -0.20    1.86
   4 -11  -3    0.22    2.00
  -4 -11   3   -1.43    2.01
   4 -11  -3    0.07    1.39
  -4 -11   3   -0.04    1.59
   4 -11  -3    0.59    1.83
   4 -11  -2    1.60    1.62
  -4 -11   2    1.35    1.89
   4 -11  -2   -1.95    1.42
  -4 -11   2    0.51    2.09
   4 -11  -1    2.11    1.51
  -4 -11   1    2.48    1.68
   4 -11  -1    1.33    1.51
   4 -11   0   -1.92    1.57
  -4 -11   0    1.92    2.41
   4 -11   0    0.70    1.88
  -4 -11   0    2.80    2.03
   4 -11   1    2.36    1.43
  -4 -11  -1    3.08    1.79
   4 -11   1    2.18    1.41
  -4 -11  -1    1.11    1.64
   4 -11   2   10.76    2.33
  -4 -11  -2    3.49    2.41
   4 -11   2    6.15    3.24
  -4 -11  -2    8.64    1.78
   4 -11   3   -0.14    1.47
  -4 -11  -3   -0.88    2.17
   4 -11   3    0.92    1.72
   4 -11   4    3.35    1.41
  -4 -11  -4    0.85    1.75
   4 -11   4    2.55    1.54
   4 -11   5    1.44    1.34
  -4 -11  -5   -1.16    2.12
   4 -11   5    1.00    1.70
  -4  11  -5    0.18    1.59
   4 -11   6    0.99    2.25
  -4 -11  -6   -0.06    1.81
   4 -11   6   -0.84    1.53
  -4  11  -6    1.84    2.09
   4 -11   7    7.42    2.01
  -4 -11  -7    4.94    2.62
   4 -11   7    6.27    2.27
   4 -11   8    2.21    1.91
  -4 -11  -8   -1.29    2.55
   4 -11   8    0.69    1.85
   4 -11   9    7.73    1.91
  -4 -11  -9   11.14    2.67
   4 -11  10    6.75    2.02
  -4 -11 -10    4.68    2.49
  -4  11 -10    6.41    1.96
   4 -11  11    3.73    1.96
  -4 -11 -11    4.22    2.27
   4 -11  12    2.22    1.85
  -4 -11 -12    3.29    2.23
  -4  11 -12    2.99    2.10
   4 -11  13    3.42    2.04
  -4  11 -13    0.58    2.28
   4 -12 -13   -0.28    2.73
   4 -12 -12    0.90    2.24
   4 -12 -11   -1.25    1.85
  -4  12  10    5.82    2.02
   4 -12 -10    5.21    1.93
   4 -12  -9   -1.00    2.00
  -4  12   8    2.50    1.78
   4 -12  -8   -0.17    2.45
   4 -12  -7   -0.14    2.02
   4 -12  -7    0.52    1.69
   4 -12  -6    4.82    1.95
   4 -12  -6    5.61    1.99
   4 -12  -6    5.43    2.20
   4 -12  -5    0.96    2.17
   4 -12  -5    2.52    1.63
   4 -12  -5    4.48    2.27
  -4 -12   5    2.92    2.52
   4 -12  -4    0.58    2.07
   4 -12  -4   -2.49    1.99
   4 -12  -4    0.07    2.12
  -4 -12   4   -1.98    1.80
   4 -12  -3   27.16    2.78
  -4 -12   3   32.25    3.29
   4 -12  -3   26.30    2.74
  -4 -12   3   31.55    3.31
   4 -12  -3   32.56    3.15
   4 -12  -2   -0.49    1.45
  -4 -12   2    1.62    1.89
   4 -12  -2    3.37    2.06
  -4 -12   2    2.47    2.45
   4 -12  -2   -0.18    1.74
   4 -12  -1    3.10    1.59
  -4 -12   1    0.96    1.92
   4 -12  -1    1.34    1.84
  -4 -12   1    1.31    1.79
   4 -12  -1    0.21    1.84
   4 -12   0    6.74    2.34
  -4 -12   0    8.66    2.04
   4 -12   0    9.39    1.76
   4 -12   0   11.83    2.23
   4 -12   1    2.67    2.01
  -4 -12  -1   -0.02    2.09
   4 -12   1    3.17    1.63
   4 -12   2   -1.58    1.50
  -4 -12  -2   -0.34    2.37
   4 -12   2   -1.00    1.58
   4 -12   3    6.50    1.68
  -4 -12  -3    6.07    2.57
   4 -12   3    4.33    1.88
   4 -12   4    1.30    1.53
  -4 -12  -4    4.62    2.51
   4 -12   4   -0.26    1.46
   4 -12   5    0.60    1.90
   4 -12   5    0.03    2.41
   4 -12   6    0.24    1.77
  -4 -12  -6    0.09    2.46
   4 -12   6   -1.22    1.98
   4 -12   7   -1.22    3.26
  -4 -12  -7   -0.87    2.06
   4 -12   7   -0.62    2.37
  -4 -12  -8    1.06    2.34
  -4  12  -8    1.02    2.51
   4 -12   9   -0.64    1.89
  -4 -12  -9   -1.84    2.43
   4 -12  10    5.62    2.20
  -4 -12 -10    1.83    2.52
   4 -13 -10    0.74    2.28
   4 -13  -9   -0.09    1.84
   4 -13  -8    3.48    2.21
   4 -13  -6   -0.26    2.14
   4 -13  -5   -1.17    1.80
   4 -13  -5    1.68    1.80
   4 -13  -4    2.65    2.34
   4 -13  -4    2.68    2.71
   4 -13  -4    3.32    1.86
   4 -13  -3    4.76    2.06
   4 -13  -3    5.58    2.30
   4 -13  -3    5.07    1.89
   4 -13  -2   -1.03    3.20
   4 -13  -2    0.68    2.12
  -4 -13   1    5.06    2.72
   4 -13  -1    2.64    2.11
   4 -13  -1    6.83    2.23
   4 -13   0    0.54    2.05
  -4 -13   0    1.50    2.40
   4 -13   0    0.44    1.75
   4 -13   0    1.68    2.00
   4 -13   1    7.66    2.71
  -4 -13  -1    9.54    2.36
   4 -13   1    6.18    2.15
   4 -13   1   11.05    2.31
   4 -13   2   11.58    2.40
  -4 -13  -2   13.26    3.01
   4 -13   2   13.27    2.38
   4 -13   2   21.92    2.81
  -4 -13  -3   -0.41    2.04
   4 -13   3    1.84    2.42
   4 -13   3    1.10    1.88
   4 -13   4    0.92    2.47
   4 -13   4    0.65    2.29
   4 -13   4    0.46    1.95
   4 -13   5    2.09    3.77
  -4 -13  -5    7.54    2.29
   4 -13   5    4.38    2.09
  -4 -13  -6    0.68    2.47
  -4 -13  -7   -0.34    3.29
   4 -14  -3   -0.88    3.30
   4 -14  -2    0.87    2.43
   4 -14  -1   -0.24    2.00
   4 -14   0    1.38    2.41
  -5   0  25    1.01    1.65
  -5   0  24   -0.85    1.47
  -5   0  24    1.34    1.65
  -5   0  23    1.13    1.51
  -5   0  23   -0.84    1.98
  -5   0  22   -0.23    1.90
  -5   0  22    0.27    1.83
  -5   0  21    0.38    1.29
  -5   0  21    3.91    2.03
  -5   0  20   -2.63    1.61
  -5   0  20   -4.34    1.77
  -5   0  19    1.79    1.22
  -5   0  19    0.16    2.03
  -5   0  19   -0.31    1.38
  -5   0  18   -1.61    1.16
  -5   0  18    2.83    2.16
  -5   0  18    0.65    1.80
  -5   0  17   20.51    2.32
  -5   0  17   16.28    3.59
  -5   0  17   17.62    2.06
  -5   0  16   -0.90    2.73
  -5   0  16   -0.52    1.53
  -5   0  16   -1.53    2.93
  -5   0  16   -2.00    1.83
  -5   0  15    0.16    3.19
  -5   0  15    3.82    1.58
  -5   0  15    3.76    2.30
  -5   0  15    1.28    1.15
  -5   0  14    0.35    2.82
  -5   0  14   -0.04    1.42
  -5   0  14    0.21    1.99
  -5   0  14   -0.92    1.04
  -5   0  13    3.57    1.93
  -5   0  13    4.07    1.59
  -5   0  13    7.93    2.05
  -5   0  13    4.93    1.18
  -5   0  12    0.15    1.62
  -5   0  12   -0.46    0.95
  -5   0  12    0.79    1.66
  -5   0  12   -1.32    0.93
  -5   0  11  199.63    8.53
  -5   0  11  215.69    7.77
  -5   0  11  200.63    7.24
  -5   0  10    0.35    2.19
  -5   0  10   -0.47    2.07
  -5   0   9   44.19    3.46
   5   0  -9   38.17    3.53
  -5   0   8    1.71    1.99
   5   0  -8   -0.25    1.94
  -5   0   7    3.76    2.02
   5   0  -7    5.35    1.61
  -5   0   6   -0.27    1.75
  -5   0   6    0.16    1.32
  -5   0   5  204.90    8.56
  -5   0   5  222.64    9.19
  -5   0   4   -1.01    1.53
  -5   0   4   -1.23    1.75
   5   0  -3  371.79    9.39
  -5   0   3  393.37    9.20
   5   0  -2   -0.16    1.68
  -5   0   2   -0.65    1.53
   5   0  -1  243.59    9.53
  -5   0   1  256.20   10.15
   5   0   0    0.22    1.34
  -5   0   0   -0.66    1.80
   5   0   1    2.26    2.04
  -5   0  -1    3.12    1.46
   5   0   2    0.82    1.48
  -5   0  -2   -0.01    1.93
   5   0   3  208.32    8.72
  -5   0  -3  174.14    7.36
   5   0   4    0.69    1.54
   5   0   5   19.44    2.33
   5   0   6   -1.35    2.06
   5   0   7   41.03    3.29
   5   0   7   38.77    2.59
   5   0   8    0.73    1.66
   5   0   8   -0.78    0.78
   5   0   8   -1.49    1.26
   5   0   9   16.10    2.26
   5   0   9   15.22    1.82
   5   0   9   17.03    1.79
   5   0  10   -0.35    2.24
   5   0  10   -0.09    1.26
   5   0  10   -0.15    2.24
   5   0  11   -1.26    1.77
   5   0  11    1.37    0.97
   5   0  11   -1.25    1.78
   5   0  12   -0.42    1.85
   5   0  13   43.19    2.73
   5   0  13   44.65    2.98
   5   0  14   -0.35    1.26
   5   0  14    3.36    3.91
   5   0  14    0.48    1.91
   5   0  15   -1.08    1.33
   5   0  15    0.39    1.35
   5   0  15    0.53    2.19
   5   0  16    2.71    1.17
   5   0  16   -1.10    1.23
   5   0  16    1.70    2.04
   5   0  17   77.36    4.69
   5   0  17   67.35    4.89
   5   0  17   61.31    5.47
   5   0  18    0.29    1.10
   5   0  18   -0.76    2.51
   5   0  19    3.99    1.41
   5   0  19    2.16    2.43
   5   0  20   -1.57    1.14
   5   0  20   -1.54    2.12
   5   0  21   -0.91    2.31
  -5  -1  25    1.56    1.46
  -5   1  25    2.78    1.59
  -5  -1  25    1.84    2.02
  -5   1  25    2.34    1.94
  -5  -1  24   -0.24    1.27
  -5   1  24    0.34    1.56
  -5  -1  24    0.50    2.00
  -5   1  24    0.21    1.82
  -5  -1  23   -0.28    1.19
  -5   1  23   -0.18    1.53
  -5  -1  23   -0.36    1.85
  -5   1  23    0.32    1.80
  -5  -1  22    2.95    1.52
  -5   1  22    7.43    1.81
  -5  -1  22    3.42    2.42
  -5   1  22    1.42    1.86
  -5  -1  21    2.06    1.25
  -5   1  21    2.66    1.67
  -5  -1  21    2.29    1.99
  -5   1  21   -2.87    1.73
  -5  -1  20    0.23    1.56
  -5   1  20    0.76    1.84
  -5  -1  20   -3.00    1.45
  -5   1  20    4.12    1.98
  -5  -1  19    0.40    1.48
  -5   1  19    1.04    1.24
  -5  -1  19    3.55    2.13
  -5   1  19   -2.09    1.96
  -5  -1  19    0.20    1.76
  -5   1  19   -0.95    1.73
  -5  -1  18   11.01    1.84
  -5   1  18   15.47    2.15
  -5   1  18   16.73    3.19
  -5  -1  18   12.02    2.65
  -5  -1  18   16.09    2.03
  -5   1  18   14.43    1.95
  -5   1  17    3.53    1.25
  -5  -1  17    2.33    3.25
  -5   1  17    6.03    2.99
  -5  -1  17    0.84    1.63
  -5   1  17    4.96    1.38
   5  -1 -17    3.29    1.84
  -5  -1  16    4.71    1.44
  -5   1  16    3.76    1.24
  -5  -1  16    4.45    2.41
  -5   1  16    0.50    3.19
  -5  -1  16    4.00    1.29
  -5   1  16    5.93    1.80
   5  -1 -16    3.68    2.23
  -5  -1  15    0.93    3.19
  -5   1  15    1.77    2.46
  -5  -1  15    5.23    1.41
  -5   1  15    2.78    1.28
  -5  -1  15    2.38    2.48
  -5   1  15    2.78    2.30
  -5  -1  15    4.67    1.24
  -5   1  15    1.72    1.49
   5  -1 -15    1.49    1.77
  -5  -1  14    0.77    2.72
  -5   1  14    1.34    2.02
  -5  -1  14    2.77    1.09
  -5   1  14    3.75    1.19
  -5  -1  14    3.39    3.00
  -5   1  14    3.18    2.01
  -5  -1  14    3.25    1.48
  -5   1  14    2.52    1.11
   5  -1 -14    0.16    1.77
  -5  -1  13    5.98    2.55
  -5   1  13    5.60    2.66
  -5   1  13    5.42    1.23
  -5  -1  13    8.63    2.83
  -5   1  13    3.62    2.51
  -5  -1  13    8.17    1.31
  -5   1  13    4.49    1.46
   5  -1 -13    4.22    1.17
   5  -1 -13    5.51    1.65
  -5  -1  12   76.15    5.34
  -5   1  12   77.93    5.03
  -5  -1  12   78.89    4.03
  -5   1  12   85.58    4.26
  -5  -1  12   82.86    5.24
  -5   1  12   76.48    4.83
  -5  -1  12   80.40    4.00
  -5   1  12   77.56    3.86
   5  -1 -12   62.82    4.74
  -5  -1  11   74.20    5.21
  -5   1  11   64.31    4.82
  -5  -1  11   69.20    3.75
  -5   1  11   67.77    3.84
  -5  -1  11   68.11    4.41
  -5   1  11   70.63    4.43
  -5  -1  11   66.16    3.66
  -5   1  11   57.03    3.15
  -5  -1  10    6.39    2.17
  -5   1  10    5.49    1.82
  -5  -1  10    8.59    2.42
  -5   1  10    6.10    1.63
  -5   1  10    6.33    1.15
  -5  -1   9   93.64    6.25
  -5   1   9   93.93    5.95
   5   1  -9   79.22    5.74
  -5  -1   8    0.89    1.62
  -5   1   8    1.87    1.53
   5   1  -8   -0.57    1.28
   5  -1  -8    0.30    2.22
  -5   1   7    1.44    1.46
  -5  -1   7    0.08    1.62
  -5   1   7    1.24    2.09
   5   1  -7    0.96    1.62
  -5   1   6   74.37    5.20
  -5  -1   6   99.63    5.96
  -5   1   6   95.41    6.03
   5   1  -6   98.20    6.31
  -5  -1   5    8.52    1.71
  -5   1   5    9.05    1.85
  -5  -1   5    9.20    1.83
  -5   1   5    8.10    1.93
  -5   1   4   59.64    3.69
  -5  -1   4   61.06    4.27
  -5  -1   4   55.10    3.44
  -5   1   4   57.13    3.64
   5  -1  -3   64.28    4.67
  -5   1   3   84.54    5.18
  -5  -1   3   84.33    5.28
  -5  -1   3   83.28    5.34
   5  -1  -2   48.09    3.51
   5   1  -2   47.48    3.15
  -5   1   2   49.44    3.44
  -5  -1   2   48.18    3.24
   5  -1  -1  100.56    6.01
   5   1  -1  109.92    5.17
  -5   1   1  115.40    5.40
  -5  -1   1  105.60    4.92
   5  -1   0    8.80    1.82
  -5   1   0    6.11    2.10
   5   1   0    7.18    1.98
  -5  -1   0    6.68    1.96
   5  -1   1   25.94    2.99
   5   1   1   21.99    2.69
  -5   1  -1   21.52    2.36
  -5  -1  -1   21.64    2.33
   5  -1   2   59.84    3.80
   5   1   2   58.37    3.75
  -5   1  -2   51.07    3.52
  -5  -1  -2   54.99    3.71
   5  -1   3   10.43    2.47
   5   1   3   10.59    2.41
  -5   1  -3    8.77    2.42
  -5  -1  -3   10.16    2.41
   5  -1   4    6.68    2.38
   5   1   4    7.52    2.34
   5  -1   5   41.01    3.33
   5   1   5   50.68    3.60
   5  -1   6  231.54    9.30
   5   1   6  230.55    9.31
   5  -1   7    5.32    1.73
   5   1   7    4.10    2.17
   5  -1   7    3.86    1.01
   5  -1   7    4.53    1.80
   5   1   7    3.10    1.19
  -5  -1  -7    6.75    1.98
   5  -1   8    9.82    1.94
   5   1   8    5.91    2.27
   5  -1   8    7.59    1.11
   5   1   8    7.12    1.22
   5  -1   8    9.95    1.55
   5   1   8    6.88    1.37
  -5  -1  -8   11.52    3.17
   5  -1   9    0.10    1.80
   5   1   9    0.40    1.60
   5  -1   9    3.18    0.97
   5  -1   9    2.24    1.29
   5   1   9    3.20    1.18
  -5  -1  -9    1.99    1.79
   5  -1  10   37.39    3.70
   5   1  10   33.51    3.68
   5  -1  10   41.42    2.35
   5   1  10   42.01    2.46
   5  -1  10   46.44    3.01
   5   1  10   40.67    2.55
  -5  -1 -10   33.42    4.39
   5  -1  11   -1.86    2.14
   5   1  11   -0.12    2.37
   5  -1  11    1.04    1.51
   5   1  11    0.44    1.11
   5  -1  11    0.75    1.36
   5   1  11   -1.30    1.24
  -5  -1 -11    2.06    1.86
   5  -1  12    1.82    1.64
   5   1  12    0.99    0.96
   5  -1  12    1.22    1.08
   5  -1  12    2.00    1.41
   5   1  12    1.68    1.31
   5  -1  13   10.97    1.34
   5   1  13   11.76    1.41
   5  -1  13   10.24    1.75
   5  -1  13   12.17    1.76
   5   1  13   10.34    2.13
   5  -1  14   -1.11    0.97
   5   1  14   -1.00    1.33
   5  -1  14   -1.79    1.49
   5  -1  14   -0.23    1.63
   5  -1  15    7.57    1.26
   5   1  15    5.32    1.19
   5  -1  15    5.55    1.45
   5  -1  15    9.74    2.43
   5   1  15    5.57    2.10
   5  -1  16    2.83    1.19
   5   1  16    0.04    1.45
   5  -1  16    2.92    1.25
   5   1  16    3.91    1.62
   5  -1  16   -0.50    2.31
   5  -1  17   22.48    2.20
   5   1  17   19.75    2.38
   5   1  17   18.45    2.33
   5  -1  17   17.44    3.13
   5   1  17   19.69    2.59
   5  -1  18   -1.99    1.73
   5  -1  19    9.62    1.71
   5   1  19    9.44    1.67
   5  -1  19    5.05    2.34
   5   1  19    7.27    1.95
   5  -1  20    3.08    1.30
   5   1  20    6.12    1.75
   5  -1  20    5.63    2.45
   5   1  20    5.89    2.55
   5  -1  21    4.30    1.71
   5   1  21    2.16    1.70
   5  -1  21    3.41    2.35
   5   1  21    1.91    2.23
  -5  -2  25    1.14    1.45
  -5   2  25    1.29    1.30
  -5  -2  25    0.79    2.31
  -5   2  25   -0.29    1.86
  -5  -2  24    0.87    1.46
  -5   2  24   -0.99    1.47
  -5  -2  24   -0.81    2.16
  -5   2  24   -0.34    2.03
  -5  -2  23   11.48    1.82
  -5   2  23    8.47    1.97
  -5  -2  23    6.92    2.03
  -5   2  23   10.78    2.20
  -5  -2  22    2.76    1.33
  -5   2  22    2.97    1.64
  -5  -2  22    3.34    1.70
  -5   2  22    1.67    1.79
  -5  -2  21    4.41    1.70
  -5   2  21    4.52    1.61
  -5  -2  21    5.84    1.99
  -5   2  21    4.77    1.58
  -5  -2  20   -1.83    1.57
  -5   2  20   -0.36    1.39
  -5  -2  20    0.90    1.40
  -5   2  20    1.37    1.35
   5  -2 -20    1.18    2.81
  -5  -2  19    0.12    1.16
  -5   2  19    1.61    1.38
  -5   2  19   -3.17    1.95
  -5  -2  19    3.59    2.01
  -5   2  19    2.52    1.33
   5  -2 -19    0.38    1.86
  -5  -2  18    8.25    1.37
  -5   2  18   10.83    1.79
  -5  -2  18   10.21    2.56
  -5   2  18   12.76    2.75
  -5  -2  18    7.93    1.85
  -5   2  18    6.46    1.87
   5  -2 -18    8.11    4.57
  -5  -2  17   -0.42    1.13
  -5   2  17    4.59    1.78
  -5  -2  17    1.09    2.85
  -5   2  17   -4.45    2.61
  -5  -2  17    0.54    1.23
  -5   2  17    0.82    1.66
   5  -2 -17    2.05    1.90
  -5  -2  16    1.39    1.39
  -5   2  16    2.65    1.20
  -5  -2  16    5.65    2.31
  -5  -2  16   -0.12    1.14
  -5   2  16   -0.06    1.69
   5  -2 -16    0.97    1.46
  -5   2  15   19.05    3.21
  -5  -2  15   22.90    2.38
  -5   2  15   28.74    2.86
  -5  -2  15   19.67    3.62
  -5   2  15   19.04    3.31
  -5  -2  15   20.60    2.05
  -5   2  15   23.30    2.34
   5  -2 -15   24.50    2.45
  -5  -2  14    2.13    2.58
  -5   2  14    1.34    2.63
  -5  -2  14    1.54    1.33
  -5   2  14    3.18    1.22
  -5  -2  14    3.28    2.19
  -5   2  14   10.56    2.79
  -5  -2  14    4.34    1.16
  -5   2  14    1.36    1.55
   5  -2 -14    5.14    1.60
   5  -2 -14    1.87    1.78
  -5  -2  13    0.35    2.27
  -5   2  13    0.48    2.83
  -5  -2  13    5.31    1.16
  -5   2  13    3.95    1.19
  -5  -2  13   -1.98    1.78
  -5   2  13    1.55    2.62
  -5  -2  13    1.69    1.04
  -5   2  13    3.54    1.38
   5  -2 -13    2.16    1.35
   5  -2 -13    1.90    1.65
  -5  -2  12   58.53    4.31
  -5   2  12   69.19    4.86
  -5  -2  12   61.95    3.30
  -5   2  12   74.42    3.79
  -5  -2  12   68.18    4.69
  -5   2  12   60.12    4.35
  -5  -2  12   69.08    3.63
  -5   2  12   63.82    3.28
   5  -2 -12   62.69    4.06
   5  -2 -12   80.16    4.63
  -5  -2  11   18.68    2.24
  -5   2  11   23.01    3.08
  -5  -2  11   18.70    1.55
  -5   2  11   23.23    2.18
  -5  -2  11   21.91    2.81
  -5   2  11   19.06    2.70
  -5  -2  11   19.71    1.83
  -5   2  11   18.61    1.51
   5  -2 -11   19.68    1.93
  -5  -2  10   55.45    4.14
  -5   2  10   56.97    4.18
   5   2 -10   45.40    3.94
  -5   2  10   63.70    3.65
  -5  -2  10   58.56    4.00
  -5   2  10   53.16    3.67
  -5   2  10   52.95    2.99
  -5  -2   9   76.02    5.06
  -5   2   9   83.71    5.58
   5   2  -9   71.00    5.33
  -5  -2   8    2.12    1.56
  -5   2   8    1.33    1.78
   5   2  -8    0.55    1.57
  -5  -2   7   54.27    3.35
  -5   2   7   46.34    3.72
   5   2  -7   47.33    3.41
  -5   2   6  147.56    6.64
  -5  -2   6  173.30    6.99
  -5   2   6  170.10    7.16
   5   2  -6  165.53    7.29
  -5   2   5    6.93    2.30
  -5   2   5    8.45    2.61
  -5   2   4   84.77    5.26
  -5   2   4   93.75    5.80
   5  -2  -3  243.15    9.62
  -5   2   3  255.23   10.22
   5   2  -2   88.50    9.80
   5  -2  -2  100.90    6.16
   5   2  -2   96.25    9.24
  -5   2   2  101.41    5.90
   5  -2  -1  112.42    5.30
  -5   2   1  104.72    4.66
   5   2  -1  118.88    5.68
  -5  -2   1  116.15    5.78
   5  -2   0  455.98   10.22
  -5   2   0  416.78   10.04
   5   2   0  430.93   10.08
  -5  -2   0  413.75   10.35
   5  -2   1    0.51    1.53
  -5   2  -1    0.68    1.54
   5   2   1    1.16    1.75
  -5  -2  -1    0.77    1.65
   5  -2   2    8.03    2.43
   5   2   2   10.50    1.89
  -5  -2  -2    7.56    2.13
   5  -2   3    7.74    1.88
   5   2   3    6.89    2.21
  -5  -2  -3    6.17    2.22
   5  -2   4   12.49    2.55
   5   2   4   11.77    1.98
   5  -2   5   -0.16    1.58
   5   2   5    0.47    2.05
   5  -2   6   12.40    2.17
   5   2   6    7.97    1.80
  -5  -2  -6   10.10    2.29
   5  -2   6    9.39    1.29
   5  -2   6    9.02    1.62
  -5  -2  -6   13.44    2.79
   5  -2   7   15.89    2.30
   5   2   7   14.22    2.17
   5  -2   7   14.94    1.37
  -5  -2  -7   17.60    2.48
   5  -2   7   14.87    1.66
   5  -2   7   15.01    1.78
  -5  -2  -7   20.66    2.42
   5  -2   8   10.86    2.83
   5   2   8   10.34    2.04
   5  -2   8    9.39    1.36
   5   2   8    7.78    1.33
   5  -2   8   12.46    1.41
   5  -2   8   10.70    1.66
   5   2   8    8.33    1.37
  -5  -2  -8    9.46    2.10
   5  -2   9   -0.88    2.53
   5   2   9   -0.79    2.12
   5  -2   9    0.61    0.92
   5   2   9   -0.17    1.24
   5  -2   9    0.84    1.11
   5  -2   9   -1.12    1.25
   5   2   9   -2.32    1.32
  -5  -2  -9   -3.41    2.53
   5  -2  10   -0.96    1.96
   5   2  10   -1.39    2.23
   5  -2  10    0.84    0.91
   5   2  10   -0.34    0.96
   5  -2  10    1.82    1.44
   5   2  10    1.06    1.15
  -5  -2 -10   -1.52    1.79
   5  -2  11    1.80    3.22
   5   2  11   -0.90    2.18
   5  -2  11    2.94    1.29
   5   2  11    0.54    0.88
   5  -2  11   -0.06    1.36
   5  -2  11    0.99    1.91
  -5  -2 -11    0.71    1.90
   5  -2  12   43.63    2.91
   5   2  12   39.56    2.84
   5  -2  12   46.28    3.32
   5  -2  12   44.05    3.16
   5   2  12   38.82    3.16
  -5  -2 -12   42.88    4.27
   5  -2  13   -0.21    1.35
   5   2  13    1.54    1.00
   5  -2  13    2.08    1.10
   5  -2  13    3.13    2.05
   5   2  13   -1.84    1.56
  -5  -2 -13   -0.21    1.99
   5  -2  14   -0.77    1.00
   5   2  14    0.68    0.99
   5  -2  14   -0.14    1.19
   5  -2  14    6.29    2.13
   5   2  14    1.20    1.41
   5  -2  15   -0.84    1.33
   5   2  15    1.42    1.33
   5  -2  15    0.76    1.14
   5  -2  15    0.65    1.74
   5   2  15    0.27    1.91
   5  -2  16   10.03    1.63
   5   2  16   10.04    1.52
   5  -2  16    6.19    1.36
   5  -2  16   10.63    2.03
   5   2  16   12.64    2.20
   5  -2  17   -1.42    1.09
   5   2  17    0.01    1.13
   5  -2  17    2.88    1.93
   5   2  17    1.59    2.03
   5  -2  18    1.74    1.66
   5   2  18    1.42    1.37
   5   2  18    1.49    1.66
   5  -2  18    1.63    2.98
   5  -2  19    8.43    2.19
   5   2  19    5.47    1.86
   5  -2  19   -1.63    2.37
   5   2  19   -0.19    2.17
   5  -2  20    0.75    1.22
   5   2  20    1.47    1.67
   5  -2  20   -1.01    2.28
   5   2  20    0.88    2.58
   5  -2  21    1.53    1.37
   5  -2  21   -0.93    2.24
   5   2  21    2.08    2.88
  -5   3  25    1.58    1.39
  -5  -3  24    3.37    1.74
  -5   3  24    3.33    1.55
  -5  -3  24    4.31    2.47
  -5   3  24    0.59    1.54
  -5  -3  23    6.99    1.86
  -5   3  23    6.40    1.68
  -5  -3  23    6.61    1.99
  -5   3  23   10.53    2.07
  -5  -3  22    7.76    1.39
  -5   3  22    6.02    1.40
  -5  -3  22    6.02    1.85
  -5   3  22    3.25    1.79
  -5  -3  21    0.27    1.20
  -5   3  21    0.78    1.25
  -5  -3  21   -0.70    1.87
  -5   3  21    1.84    1.54
   5  -3 -21   -3.90    2.90
  -5  -3  20    3.12    1.22
  -5   3  20    0.03    1.59
  -5  -3  20    0.57    1.63
  -5   3  20    1.52    1.62
   5  -3 -20   -2.54    2.05
  -5  -3  19   13.67    2.06
  -5   3  19    8.83    1.74
  -5  -3  19    8.63    1.56
  -5   3  19    7.80    1.80
   5  -3 -19    8.25    2.21
  -5  -3  18   18.91    2.38
  -5   3  18   17.51    2.32
  -5   3  18   22.65    3.40
  -5  -3  18   21.17    2.32
  -5   3  18   23.84    2.40
   5  -3 -18   12.14    2.63
  -5  -3  17   82.51    4.68
  -5   3  17   74.02    4.49
  -5  -3  17   93.07    5.85
  -5   3  17   81.86    5.86
  -5  -3  17   87.51    4.93
  -5   3  17   96.20    5.16
   5  -3 -17   89.77    7.40
  -5  -3  16    0.30    2.01
  -5   3  16    0.25    1.24
  -5  -3  16   -1.88    2.61
  -5   3  16   -1.54    2.65
  -5  -3  16   -0.09    1.16
  -5   3  16    2.81    1.16
   5  -3 -16    0.22    1.69
  -5  -3  15    2.75    1.05
  -5   3  15    0.27    1.13
  -5  -3  15    0.74    2.04
  -5   3  15    0.92    2.10
  -5  -3  15    1.82    1.57
  -5   3  15   -1.58    1.39
   5  -3 -15    0.49    2.20
   5  -3 -15    3.50    1.36
  -5   3  14   18.84    3.87
  -5  -3  14   21.79    2.26
  -5   3  14   26.29    2.85
  -5  -3  14   24.92    3.49
  -5   3  14   22.25    2.99
  -5  -3  14   20.41    2.01
  -5   3  14   17.82    2.08
   5  -3 -14   19.15    2.00
  -5   3  13    1.72    2.20
  -5  -3  13   -0.93    1.24
  -5   3  13    0.52    1.10
  -5  -3  13    1.29    2.03
  -5   3  13    0.94    2.13
  -5  -3  13    0.83    1.04
  -5   3  13    1.00    1.09
   5  -3 -13   -2.16    1.35
   5  -3 -13    0.21    1.66
  -5  -3  12    6.02    2.19
  -5   3  12    5.54    2.19
  -5  -3  12    6.23    1.08
  -5   3  12    6.92    1.34
  -5  -3  12    4.75    3.01
  -5   3  12    8.57    2.52
  -5  -3  12    6.33    1.31
  -5   3  12    5.49    1.82
   5  -3 -12    5.52    1.18
   5  -3 -12    9.40    1.78
  -5  -3  11    2.35    2.24
  -5   3  11    1.77    1.86
  -5  -3  11    1.92    1.87
  -5   3  11    2.24    1.08
  -5  -3  11    2.74    1.78
  -5   3  11    1.18    1.54
  -5  -3  11    2.01    1.23
  -5   3  11    2.17    1.01
   5  -3 -11    3.91    1.55
  -5  -3  10    0.36    1.62
  -5   3  10    1.58    1.80
   5  -3 -10    3.16    1.27
  -5  -3  10    0.23    1.52
  -5   3  10   -1.29    1.42
  -5   3  10    0.82    1.36
   5  -3 -10    0.78    1.60
  -5  -3   9   13.05    2.18
  -5   3   9   13.16    2.23
   5   3  -9    9.55    2.24
   5  -3  -9   13.90    1.84
  -5   3   9   11.85    1.32
   5  -3  -9   15.83    1.51
  -5  -3   8    6.24    1.62
  -5   3   8    7.94    2.01
   5   3  -8    5.96    1.77
  -5  -3   7   36.59    2.99
  -5   3   7   39.47    3.52
   5   3  -7   34.15    3.06
  -5   3   6   52.46    3.51
  -5   3   5   18.77    3.00
  -5   3   4    2.07    2.43
   5  -3  -3    9.25    2.67
   5  -3  -2   64.43    4.76
   5   3  -2   58.50    5.80
   5   3  -2   64.83    5.47
   5   3  -1    0.86    1.28
   5  -3  -1    2.62    2.24
   5   3  -1    0.59    1.59
   5  -3   0   15.62    2.70
   5   3   0   12.31    2.14
  -5  -3   0   13.25    2.29
   5  -3   1   60.43    4.28
   5   3   1   54.21    3.42
  -5  -3  -1   48.52    3.68
   5  -3   2   81.21    5.08
   5   3   2   80.19    5.29
  -5  -3  -2   74.14    5.65
   5  -3   3   46.67    3.53
   5   3   3   43.69    3.37
  -5  -3  -3   33.06    3.04
   5  -3   4    0.31    1.47
   5   3   4    0.76    1.47
   5  -3   6   37.26    3.20
   5  -3   6   36.05    2.30
  -5  -3  -6   39.11    3.12
   5  -3   6   33.55    2.18
   5  -3   6   33.42    2.83
  -5  -3  -6   47.76    3.83
   5  -3   7   17.25    2.84
   5   3   7   15.39    2.23
   5  -3   7   18.09    1.78
  -5  -3  -7   20.69    2.49
   5  -3   7   16.73    1.50
   5  -3   7   19.68    2.66
  -5  -3  -7   21.11    2.84
   5  -3   8   54.50    3.92
   5   3   8   53.99    3.92
   5  -3   8   63.84    3.22
  -5  -3  -8   54.58    3.77
   5  -3   8   56.37    3.11
   5  -3   8   63.03    3.66
   5   3   8   41.70    3.90
  -5  -3  -8   68.70    4.67
   5  -3   9    4.64    2.63
   5   3   9    5.99    2.60
   5  -3   9   -0.76    1.24
   5   3   9    0.89    1.01
  -5  -3  -9   -0.38    2.08
   5  -3   9    1.93    1.64
   5  -3   9   -0.21    1.82
   5   3   9    1.03    1.18
  -5  -3  -9    5.10    2.71
   5  -3  10   -0.39    2.61
   5   3  10    0.66    1.86
   5  -3  10    2.90    1.41
   5   3  10    3.38    1.31
  -5  -3 -10    2.08    1.64
   5  -3  10    1.19    1.00
   5  -3  10    0.60    1.41
   5   3  10    2.25    1.25
  -5  -3 -10    3.49    1.98
   5  -3  11   27.46    2.67
   5   3  11   24.87    1.74
   5  -3  11   25.16    2.64
   5  -3  11   25.80    3.34
   5   3  11   27.24    2.81
  -5  -3 -11   29.29    3.98
   5  -3  12    6.59    1.21
   5   3  12   10.06    1.40
   5  -3  12    6.74    1.51
   5  -3  12    6.34    1.76
   5   3  12    7.24    2.11
  -5  -3 -12    9.54    2.37
   5  -3  13   12.13    1.61
   5   3  13   12.32    1.60
   5  -3  13   20.47    2.56
   5  -3  13    9.87    2.06
   5   3  13    6.99    1.54
  -5  -3 -13   13.23    4.62
   5  -3  14   25.32    2.58
   5   3  14   21.34    2.19
   5  -3  14   24.34    2.70
   5  -3  14   11.01    2.98
   5   3  14   25.70    4.10
  -5  -3 -14   21.36    3.84
   5  -3  15    6.55    1.38
   5   3  15    4.57    1.46
   5  -3  15    6.83    1.62
   5  -3  15    4.42    2.31
   5   3  15    6.33    1.93
   5  -3  16    8.78    1.58
   5   3  16   10.38    1.77
   5  -3  16   10.93    3.07
   5   3  16    9.53    1.78
   5  -3  17    2.05    1.54
   5   3  17    2.22    1.50
   5  -3  17    1.77    2.54
   5   3  17   -1.28    1.74
  -5   3 -17    4.34    2.20
   5  -3  18    1.00    1.13
   5   3  18   -1.74    1.46
   5   3  18   -0.40    1.95
   5  -3  18   -1.06    1.89
   5   3  18    2.13    1.82
   5  -3  19    1.90    1.50
   5   3  19    2.58    1.33
   5  -3  19    2.12    2.42
   5   3  19    2.43    2.06
   5  -3  20    0.41    1.49
   5   3  20    0.28    2.75
   5  -3  21    0.11    1.73
   5  -3  21    1.15    2.43
  -5  -4  24   -1.79    1.73
  -5   4  24   -1.10    1.47
  -5  -4  24    0.98    3.08
  -5   4  24   -1.33    1.93
  -5  -4  23   -1.05    1.68
  -5   4  23   -1.04    1.22
  -5  -4  23    0.12    2.17
  -5   4  23   -0.05    2.01
  -5  -4  22    0.89    1.23
  -5   4  22    9.41    5.60
  -5  -4  22    0.20    2.05
  -5   4  22    0.03    1.83
  -5  -4  21    3.15    1.48
  -5   4  21    2.41    1.82
  -5  -4  21    0.92    1.96
   5  -4 -21    3.30    2.87
  -5  -4  20    2.28    1.50
  -5   4  20    4.18    1.65
  -5  -4  20    3.41    2.34
  -5   4  20    2.80    1.74
   5  -4 -20    3.03    2.61
  -5  -4  19    0.41    1.14
  -5   4  19   -1.50    1.30
  -5  -4  19    0.49    1.61
  -5   4  19    3.41    1.70
   5  -4 -19    3.80    2.87
  -5  -4  18   -0.39    1.15
  -5   4  18    0.30    1.33
  -5  -4  18    1.17    1.62
  -5   4  18   -0.11    1.30
   5  -4 -18    2.17    1.81
  -5  -4  17   -1.15    1.29
  -5   4  17   -2.57    1.26
  -5   4  17   -2.17    2.16
  -5  -4  17   -0.09    1.70
  -5   4  17   -1.36    1.19
   5  -4 -17   -0.54    2.49
  -5  -4  16    5.41    1.17
  -5   4  16    4.24    1.37
  -5  -4  16    3.63    1.88
  -5   4  16    1.80    2.12
  -5  -4  16    4.77    1.64
  -5   4  16    2.28    1.23
   5  -4 -16    3.58    1.99
  -5  -4  15   28.23    2.64
  -5   4  15   28.17    2.94
  -5  -4  15   27.51    3.65
  -5   4  15   23.58    3.63
  -5  -4  15   26.63    2.53
  -5   4  15   21.23    2.16
   5  -4 -15   24.08    2.50
   5  -4 -15   24.64    2.58
  -5  -4  14   37.78    2.50
  -5   4  14   43.01    2.90
  -5  -4  14   37.20    3.85
  -5   4  14   34.00    4.22
  -5  -4  14   37.53    2.65
  -5   4  14   39.44    2.80
   5  -4 -14   39.44    2.81
   5  -4 -14   39.43    3.26
  -5   4  13    8.44    2.58
  -5  -4  13    9.31    1.46
  -5   4  13    8.20    1.44
  -5  -4  13    9.75    3.05
  -5   4  13    9.68    3.14
  -5  -4  13    9.63    1.36
  -5   4  13   10.79    1.47
   5  -4 -13   12.25    2.01
   5  -4 -13   11.67    1.80
  -5   4  12   23.11    3.13
  -5  -4  12   24.85    2.25
  -5   4  12   26.35    2.26
  -5  -4  12   17.31    3.46
  -5   4  12   27.04    6.59
  -5  -4  12   23.30    2.26
  -5   4  12   28.47    2.38
   5  -4 -12   30.32    2.81
   5  -4 -12   25.94    2.69
  -5   4  11   41.79    3.98
  -5  -4  11   46.16    2.42
  -5  -4  11   52.74    3.80
  -5   4  11   45.16    3.42
   5  -4 -11   37.02    3.11
  -5  -4  11   46.52    3.11
  -5   4  11   39.62    2.22
   5  -4 -11   43.20    2.44
   5  -4 -11   54.16    2.97
  -5   4  10    9.74    2.22
   5  -4 -10    9.72    1.83
  -5  -4  10    8.43    1.13
  -5  -4  10    9.99    2.67
  -5   4  10    9.92    2.24
   5  -4 -10    7.72    1.63
  -5   4  10   10.04    1.39
   5  -4 -10   12.78    2.27
  -5  -4   9  274.97   11.36
  -5   4   9  288.53   11.19
   5  -4  -9  281.08    9.85
  -5   4   9  241.60    8.45
   5  -4  -9  243.33    9.61
   5  -4  -9  307.53   10.43
  -5  -4   8    3.63    1.66
  -5   4   8    1.90    2.00
   5  -4  -8    1.52    1.50
  -5   4   8    3.42    1.25
   5  -4  -8    2.29    1.66
   5  -4  -8    3.25    1.04
  -5  -4   7  102.06    6.26
   5   4  -7  104.10    6.69
  -5   4   7  109.80    5.69
   5  -4  -7  114.48    5.02
   5  -4  -7  107.94    3.32
  -5   4   6   36.46    3.07
  -5   4   5  124.11    6.14
  -5   4   4  101.24    6.37
   5   4  -3  209.87   20.01
   5   4  -3  223.28   17.22
  -5   4   3  233.88    9.53
   5  -4  -2   21.43    2.56
   5   4  -2   16.64    2.07
   5   4  -2   21.51    2.55
   5  -4  -1  123.96    5.83
   5   4  -1  114.98    5.71
   5   4  -1  135.77    6.28
   5   4   0   24.84    2.65
   5  -4   0   30.56    3.12
   5   4   0   28.68    2.77
   5  -4   1   84.88    5.30
   5   4   1   90.31    5.64
  -5  -4  -1   82.19    6.04
   5  -4   2   -0.47    2.16
  -5  -4  -2    3.46    1.74
   5  -4   3  130.79    5.76
   5   4   3  133.71    6.40
   5  -4   3  115.58    4.13
   5  -4   3  133.35    4.66
   5  -4   4   10.15    2.02
   5   4   4    9.71    2.28
   5  -4   4    9.76    1.25
  -5  -4  -4   11.44    2.16
   5  -4   4   10.14    1.25
   5  -4   4    9.94    2.57
  -5  -4  -4    9.66    2.40
   5  -4   5   43.59    3.43
   5   4   5   40.00    3.29
   5  -4   5   46.07    2.55
  -5  -4  -5   45.73    3.82
   5  -4   5   50.90    2.86
   5  -4   5   45.22    3.42
  -5  -4  -5   50.30    4.83
   5  -4   6    5.95    1.89
   5   4   6    4.20    1.71
   5  -4   6    4.88    1.37
  -5  -4  -6    4.34    1.49
   5  -4   6    6.17    1.44
   5  -4   6    4.42    1.52
  -5  -4  -6    4.57    1.86
   5  -4   7   31.32    3.39
   5   4   7   27.51    3.86
   5  -4   7   28.48    2.38
  -5  -4  -7   31.60    2.98
   5  -4   7   32.77    2.75
   5  -4   7   31.93    6.86
  -5  -4  -7   39.87    4.32
   5  -4   8    0.01    1.82
   5   4   8   -1.06    1.74
   5  -4   8   -0.60    0.98
  -5  -4  -8    1.69    2.09
   5  -4   8   -0.42    0.96
   5  -4   8    2.26    1.52
  -5  -4  -8    2.44    1.98
   5  -4   9    2.89    2.76
   5   4   9    1.00    2.34
   5  -4   9    3.13    1.07
   5   4   9    2.39    0.97
  -5  -4  -9    4.59    1.72
   5  -4   9    1.27    2.17
  -5  -4  -9    5.37    2.08
   5  -4  10    1.61    1.08
   5   4  10    2.09    0.98
  -5  -4 -10    6.51    2.19
   5  -4  10    0.81    1.33
   5  -4  10    0.05    1.44
  -5  -4 -10    4.05    2.87
   5  -4  11    5.00    1.16
   5   4  11    5.22    1.43
  -5  -4 -11    5.45    1.82
   5  -4  11    3.30    1.43
   5  -4  11    4.00    2.14
   5   4  11   10.54    2.05
   5  -4  12    2.75    1.31
   5   4  12    1.90    1.69
   5  -4  12    1.63    1.63
   5  -4  12    0.10    1.57
   5   4  12    1.92    1.64
  -5  -4 -12   -0.46    3.00
   5  -4  13   23.62    3.37
   5   4  13   19.44    2.38
   5  -4  13   21.54    2.69
   5  -4  13   19.34    3.17
   5   4  13   14.18    3.11
  -5  -4 -13   26.70    4.43
   5  -4  14    2.75    1.17
   5   4  14    1.91    1.33
   5  -4  14    3.14    1.20
   5  -4  14    0.80    2.20
   5   4  14    0.60    2.01
  -5  -4 -14   -5.72    2.84
   5   4  15    1.89    1.18
   5  -4  15    3.98    1.46
   5  -4  15    3.03    1.80
   5   4  15    4.59    1.97
  -5  -4 -15    5.12    2.34
   5  -4  16   -1.41    1.11
   5   4  16    0.48    1.49
   5  -4  16   -1.66    1.77
   5   4  16   -0.12    1.85
   5  -4  17    1.31    1.23
   5   4  17    0.88    1.66
   5  -4  17    4.54    2.41
  -5   4 -17    1.65    2.16
   5  -4  18   -0.96    1.27
  -5   4 -18   -0.45    1.76
   5  -4  19    1.41    1.22
   5  -4  19    1.30    2.33
   5  -4  20    5.65    1.78
   5  -4  20   -2.82    2.40
   5  -4  21   -0.81    1.96
   5  -4  21    0.67    2.50
  -5   5  24    1.87    1.59
  -5  -5  23    1.09    2.15
  -5   5  23    2.67    1.72
   5  -5 -23   -0.22    3.70
  -5  -5  22   -0.41    1.74
  -5   5  22   -2.25    1.44
  -5   5  22    0.91    1.54
   5  -5 -22    0.80    2.70
  -5  -5  21   -2.11    1.61
  -5   5  21   -0.37    1.66
  -5  -5  21    1.65    2.20
  -5   5  21   -0.30    1.37
  -5  -5  20   -2.06    1.16
  -5   5  20    0.23    1.19
  -5  -5  20   -1.91    1.72
   5  -5 -20   -1.04    1.98
  -5  -5  19   -1.23    1.29
  -5   5  19   -1.33    1.59
  -5  -5  19    1.79    1.97
  -5   5  19    0.54    1.92
   5  -5 -19    3.76    2.43
  -5  -5  18    1.16    1.09
  -5   5  18    0.55    1.98
  -5  -5  18   -1.01    1.80
  -5   5  18   -1.37    1.54
   5  -5 -18    3.13    1.87
  -5  -5  17    6.57    1.47
  -5   5  17   10.02    1.75
  -5  -5  17    7.55    1.69
  -5   5  17    8.50    1.73
   5  -5 -17    8.55    1.97
  -5  -5  16   13.10    2.03
  -5   5  16    7.46    1.48
  -5   5  16   13.16    2.86
  -5  -5  16    9.53    1.74
  -5   5  16   12.70    1.94
   5  -5 -16   12.14    2.20
  -5  -5  15    2.42    1.03
  -5   5  15    4.84    2.03
  -5   5  15    0.88    2.53
  -5  -5  15    1.19    1.38
  -5   5  15    0.21    1.04
   5  -5 -15    0.70    1.52
   5  -5 -15    0.34    1.98
  -5  -5  14    0.66    1.34
  -5   5  14    0.29    1.36
  -5  -5  14   -0.34    1.68
  -5   5  14   -0.64    1.94
  -5  -5  14    2.18    1.67
  -5   5  14    1.38    1.49
   5  -5 -14   -1.29    1.31
   5  -5 -14    3.56    1.42
  -5  -5  13   11.14    1.57
  -5   5  13   16.02    2.21
  -5  -5  13    4.93    2.29
  -5   5  13    8.84    2.36
   5  -5 -13   11.48    2.04
  -5  -5  13    9.74    1.73
  -5   5  13   12.94    1.80
   5  -5 -13   12.45    1.61
   5  -5 -13   12.95    1.91
  -5   5  12   15.83    3.04
  -5  -5  12   15.19    1.68
  -5   5  12   17.45    1.96
  -5  -5  12   13.91    2.87
  -5   5  12   11.87    2.51
   5  -5 -12   12.33    2.12
  -5   5  12   15.67    1.66
   5  -5 -12   17.15    2.05
   5  -5 -12   22.34    2.54
  -5   5  11   69.75    6.11
   5  -5 -11   75.63    5.82
  -5  -5  11   70.64    5.36
  -5  -5  11   74.20    6.45
   5  -5 -11   79.34    6.24
  -5   5  11   71.96    5.34
   5  -5 -11   58.21    5.12
   5  -5 -11   57.40    4.66
  -5   5  10    4.64    2.12
   5  -5 -10    7.74    1.46
  -5  -5  10    6.52    1.10
   5  -5 -10    4.87    1.53
  -5   5  10    9.36    1.20
   5  -5 -10   10.95    1.67
   5  -5 -10   10.48    1.47
  -5   5   9   12.74    2.43
   5  -5  -9   16.38    1.68
  -5  -5   9   10.82    1.65
   5  -5  -9   12.52    1.71
  -5   5   9   11.90    1.46
   5  -5  -9   12.90    1.95
   5  -5  -9   11.53    1.41
  -5   5   8    8.29    2.15
   5  -5  -8    7.03    1.70
   5  -5  -8    7.08    1.22
  -5   5   8    8.62    1.17
   5  -5  -8    9.55    1.96
   5  -5  -8    9.38    1.54
  -5   5   7  108.62    5.11
   5  -5  -7  119.02    5.05
   5  -5  -7  105.20    5.36
  -5   5   7  103.72    5.13
   5  -5  -7  111.54    4.80
  -5   5   6   13.54    2.28
   5  -5  -6   12.48    1.76
  -5   5   6   11.69    1.49
   5  -5  -6   12.93    1.31
  -5   5   5   24.29    3.08
   5  -5  -5   29.31    2.45
   5  -5  -5   25.24    2.00
   5  -5  -5   24.57    1.74
   5   5  -4   10.25    2.46
   5   5  -4   11.03    2.20
  -5   5   4   11.76    2.70
   5  -5  -4   13.97    1.90
   5  -5  -4   11.86    1.25
   5  -5  -4   12.59    1.27
   5   5  -3    1.14    1.49
   5   5  -3    1.16    1.31
  -5   5   3    1.21    1.72
   5  -5  -3    2.30    1.47
   5  -5  -3    2.02    0.93
   5  -5  -2    0.74    1.65
   5   5  -2    0.80    1.27
   5   5  -2    0.23    1.36
   5  -5  -2   -0.01    1.35
   5  -5  -2    0.42    0.87
   5  -5  -1   39.50    3.74
   5   5  -1   31.81    2.88
   5   5  -1   41.16    3.51
   5  -5  -1   38.02    2.32
   5  -5  -1   35.72    2.18
   5  -5   0    3.06    2.45
   5   5   0    2.87    1.84
   5   5   0    4.65    1.46
   5  -5   0    3.20    1.29
   5  -5   0    4.39    1.05
   5   5   1    5.78    2.28
   5  -5   1    8.71    2.65
   5   5   1    6.84    2.10
   5  -5   1    8.80    1.44
  -5  -5  -1    7.17    1.52
   5  -5   1    7.46    1.45
   5  -5   2    1.81    1.68
   5   5   2    2.58    1.96
   5  -5   2    1.72    1.03
  -5  -5  -2    0.94    1.28
   5  -5   2    1.01    0.91
   5  -5   2    2.22    2.05
  -5  -5  -2    1.23    1.19
   5  -5   3    6.74    2.46
   5   5   3    6.38    2.11
   5  -5   3    6.73    1.14
   5  -5   3    5.78    1.50
  -5  -5  -3    7.74    1.79
  -5  -5  -3    5.70    1.74
   5  -5   4   10.10    2.08
   5   5   4    7.70    2.38
   5  -5   4   12.10    1.30
  -5  -5  -4   10.31    1.65
   5  -5   4   11.53    1.57
   5  -5   4    3.95    2.27
  -5  -5  -4   15.89    2.21
   5  -5   5    1.80    2.52
   5   5   5   -0.97    1.75
   5  -5   5    1.04    0.94
  -5  -5  -5    0.52    1.83
   5  -5   5   -0.32    0.95
   5  -5   5    0.57    1.60
  -5  -5  -5   -0.25    1.61
   5  -5   6    0.44    1.85
   5   5   6    1.12    2.41
   5  -5   6    1.84    0.99
  -5  -5  -6    2.28    2.03
   5  -5   6    1.45    0.94
   5  -5   6   -1.93    2.09
   5  -5   7   74.54    6.55
   5   5   7   68.35    6.09
   5  -5   7   81.53    5.93
  -5  -5  -7   92.21    7.14
   5  -5   7   92.57    6.85
   5  -5   7   88.08    6.90
  -5  -5  -7   94.21    9.46
   5  -5   8    2.97    2.17
   5   5   8   -0.68    2.47
   5  -5   8    2.04    1.26
  -5  -5  -8    3.67    1.59
   5  -5   8    2.27    1.36
   5  -5   8    1.24    2.03
  -5  -5  -8    1.27    1.91
   5  -5   9    1.01    1.09
  -5  -5  -9    1.87    2.05
   5  -5   9    2.02    0.97
   5  -5   9    4.13    2.28
  -5  -5  -9    0.77    2.11
   5  -5  10    9.57    1.96
  -5  -5 -10    8.07    1.97
   5  -5  10   12.37    1.78
   5  -5  10    7.22    1.79
  -5  -5 -10    7.96    2.34
   5  -5  11   42.17    2.50
  -5  -5 -11   36.25    3.23
   5  -5  11   41.66    2.77
   5  -5  11   29.52    3.45
  -5  -5 -11   34.80    4.50
   5  -5  12    1.03    1.53
   5   5  12    0.35    1.06
  -5  -5 -12    1.61    2.41
   5  -5  12    0.25    1.24
   5  -5  12    3.34    2.19
  -5  -5 -12    2.54    2.68
   5  -5  13   -0.12    1.15
   5   5  13    0.14    1.37
   5  -5  13    0.54    1.33
   5  -5  13    3.04    1.96
  -5  -5 -13   -1.84    2.27
   5  -5  14   -1.02    1.13
   5  -5  14    0.61    1.12
   5  -5  14   -0.92    1.80
  -5  -5 -14    2.44    2.95
   5  -5  15    5.13    1.33
   5  -5  15    8.30    2.48
  -5  -5 -15    9.82    3.42
   5  -5  16    1.10    1.59
   5  -5  16    3.83    1.88
   5  -5  17   -0.13    1.64
   5  -5  17    1.40    1.87
  -5   5 -17    1.66    2.12
   5  -5  18   -0.06    1.96
   5  -5  18    3.42    2.32
  -5   5 -18    1.71    2.01
   5  -5  19    5.27    1.73
   5  -5  19   -1.85    2.80
   5  -5  20    0.29    1.25
   5  -5  20    1.68    2.17
  -5   6  23    1.08    1.60
  -5  -6  22    0.22    2.25
  -5   6  22   -0.49    1.79
  -5  -6  21    2.15    1.90
  -5   6  21    2.39    1.70
  -5   6  21    1.31    1.97
   5  -6 -21   -2.65    2.87
  -5  -6  20   -0.27    2.36
  -5   6  20   -1.67    1.64
  -5   6  20   -0.23    1.94
   5  -6 -20    1.07    2.48
  -5  -6  19    3.01    1.65
  -5   6  19    0.63    1.28
  -5   6  19    6.20    1.74
   5  -6 -19    3.23    3.15
  -5  -6  18   -0.21    1.19
  -5   6  18    3.31    2.01
  -5   6  18   -0.24    1.89
   5  -6 -18    1.92    1.92
  -5  -6  17   28.24    2.48
  -5   6  17   33.21    2.60
  -5   6  17   31.28    2.53
   5  -6 -17   30.34    3.50
  -5  -6  16   41.25    3.44
  -5   6  16   42.06    3.62
  -5   6  16   32.87    2.90
   5  -6 -16   30.62    3.21
  -5  -6  15   14.04    2.15
  -5   6  15   17.32    2.55
  -5   6  15   15.49    2.38
   5  -6 -15   13.03    2.68
   5  -6 -15   17.41    2.52
  -5  -6  14    2.29    1.34
  -5   6  14    0.94    1.23
   5  -6 -14   -0.08    1.45
  -5   6  14    1.44    1.09
   5  -6 -14   -0.39    1.92
   5  -6 -14    1.77    1.47
  -5  -6  13    9.06    1.47
  -5   6  13   13.70    2.09
   5  -6 -13   10.18    1.80
  -5   6  13    8.79    1.31
   5  -6 -13   11.85    1.74
   5  -6 -13   12.51    1.73
  -5  -6  12    2.12    1.47
  -5   6  12    2.33    1.18
   5  -6 -12    2.85    1.35
  -5   6  12    2.98    1.15
   5  -6 -12    2.41    1.82
   5  -6 -12    1.45    1.44
   5  -6 -11    1.29    1.36
  -5  -6  11    0.22    0.98
   5  -6 -11    1.40    1.58
  -5   6  11    0.47    1.28
   5  -6 -11    0.62    1.12
   5  -6 -11    0.35    1.70
  -5   6  10   11.60    3.52
   5  -6 -10   20.32    2.22
  -5  -6  10   21.81    2.07
   5  -6 -10   19.44    2.26
  -5   6  10   19.22    1.99
   5  -6 -10   29.80    3.01
   5  -6 -10   27.77    3.09
   5  -6 -10   32.13    3.29
  -5   6   9   -0.44    1.85
   5  -6  -9    1.65    1.65
   5  -6  -9    0.63    1.27
  -5   6   9    0.32    1.19
   5  -6  -9    0.38    1.26
   5  -6  -9    0.06    2.76
  -5   6   8    8.09    2.14
   5  -6  -8   11.54    1.75
   5  -6  -8   11.96    1.51
  -5   6   8    8.18    1.16
   5  -6  -8   14.77    1.88
   5  -6  -8    9.99    1.41
  -5   6   7    2.26    1.75
   5  -6  -7    0.34    1.15
   5  -6  -7    1.44    1.42
  -5   6   7    1.22    1.23
   5  -6  -7    0.32    1.76
   5  -6  -7    0.24    0.95
  -5   6   6    7.54    2.12
   5  -6  -6    7.17    1.39
   5  -6  -6    5.37    1.49
  -5   6   6    3.87    1.31
   5  -6  -6    6.24    1.13
  -5   6   5   25.20    3.10
   5  -6  -5   31.03    3.06
   5  -6  -5   35.70    2.96
  -5   6   5   25.47    2.60
   5  -6  -5   29.42    2.59
  -5   6   4   11.80    2.24
   5  -6  -4   12.00    1.48
  -5  -6   4    8.95    1.44
   5  -6  -4   11.62    1.32
   5  -6  -4    9.62    1.20
  -5   6   3    8.73    2.12
   5  -6  -3    5.90    1.29
  -5  -6   3    6.71    1.46
   5  -6  -3    8.39    1.45
   5  -6  -3    6.77    1.07
   5   6  -2   17.08    2.35
  -5   6   2   17.04    2.55
   5  -6  -2   16.68    1.75
  -5  -6   2   18.07    3.90
   5  -6  -2   17.60    1.66
   5  -6  -1   57.04    4.31
   5   6  -1   58.87    4.15
   5  -6  -1   67.89    3.45
  -5  -6   1   74.39    4.19
   5  -6  -1   68.15    3.41
   5  -6   0    5.62    1.95
   5   6   0    5.95    2.04
   5  -6   0    8.16    1.22
  -5  -6   0    7.83    1.93
   5  -6   0    7.63    1.41
  -5  -6   0    2.09    1.20
   5  -6   1  102.28    6.26
   5   6   1   96.10    5.67
   5  -6   1  119.57    5.21
  -5  -6  -1  129.66    6.33
   5  -6   1  123.08    5.48
  -5  -6  -1  113.05    7.75
  -5  -6  -1  112.69    5.47
   5  -6   2   17.65    2.46
   5   6   2   20.33    3.17
   5  -6   2   21.15    2.00
  -5  -6  -2   21.94    2.35
   5  -6   2   23.39    2.09
  -5  -6  -2   21.54    3.08
  -5  -6  -2   19.73    2.42
   5  -6   3    4.91    2.53
   5   6   3    1.12    1.55
   5  -6   3    4.86    1.32
  -5  -6  -3    3.25    1.81
   5  -6   3    3.36    1.17
   5  -6   3    6.90    2.29
  -5  -6  -3    4.69    1.69
  -5  -6  -3    4.43    1.33
   5  -6   4   55.44    4.21
   5   6   4   56.97    4.19
   5  -6   4   62.17    2.84
  -5  -6  -4   66.70    4.59
   5  -6   4   56.24    2.71
   5  -6   4   61.78    3.65
  -5  -6  -4   66.01    5.78
   5  -6   5    6.63    2.15
   5   6   5    4.17    1.92
   5  -6   5    4.89    1.37
  -5  -6  -5    8.73    2.02
   5  -6   5    9.36    1.28
   5  -6   5    5.79    2.16
  -5  -6  -5    8.62    2.04
   5  -6   6    2.96    4.58
   5   6   6    2.50    3.02
   5  -6   6    6.52    1.57
  -5  -6  -6    4.61    1.57
   5  -6   6    4.03    1.20
   5  -6   6    5.24    1.53
  -5  -6  -6    7.21    2.42
   5  -6   7    1.57    2.38
   5   6   7    3.69    2.62
   5  -6   7    1.80    1.00
  -5  -6  -7    2.62    1.56
   5  -6   7    0.82    1.51
   5  -6   7    2.63    1.53
  -5  -6  -7    0.26    1.79
   5  -6   8   50.21    4.38
  -5  -6  -8   48.73    4.88
   5  -6   8   55.38    3.46
   5  -6   8   46.11    4.12
  -5  -6  -8   42.18    5.46
   5  -6   9    2.36    1.53
  -5  -6  -9    4.84    1.75
   5  -6   9    0.26    1.53
   5  -6   9    0.09    1.95
  -5  -6  -9    6.27    2.28
   5  -6  10   21.32    2.56
  -5  -6 -10   17.96    2.67
   5  -6  10   20.98    2.68
   5  -6  10   21.76    3.36
  -5  -6 -10   14.45    3.71
   5  -6  11    6.29    1.42
  -5  -6 -11    7.32    1.89
   5  -6  11    9.64    1.94
   5  -6  11    8.57    2.57
  -5  -6 -11    3.34    2.21
   5  -6  12   -0.04    1.18
  -5  -6 -12    1.78    2.45
   5  -6  12    0.28    1.11
   5  -6  12    0.44    1.66
  -5  -6 -12    2.39    2.80
   5  -6  13   20.02    2.52
   5  -6  13   18.33    2.36
   5  -6  13    8.32    3.17
  -5  -6 -13   19.27    5.04
   5  -6  14   -0.10    1.22
   5  -6  14   -2.01    1.72
  -5  -6 -14    3.54    2.48
   5  -6  15   14.38    2.76
   5  -6  15   -0.16    2.43
  -5  -6 -15    3.78    2.40
   5  -6  16    2.18    1.46
   5  -6  16    2.68    2.27
   5  -6  17    0.20    1.66
   5  -6  17   -2.06    2.55
  -5   6 -17    0.13    1.59
   5  -6  18   -0.01    1.21
  -5   6 -18   -0.50    2.03
   5  -6  19    1.76    1.93
   5  -6  19    1.03    2.38
  -5   7  22   -0.62    1.63
   5  -7 -22    1.24    2.92
  -5   7  21    1.06    2.12
   5  -7 -21   -2.11    2.84
  -5  -7  20    0.27    1.73
  -5   7  20    0.44    1.47
   5  -7 -20    2.20    3.00
  -5  -7  19   -0.03    1.42
  -5   7  19   -1.39    1.59
   5  -7 -19    2.33    2.14
  -5  -7  18   -0.41    1.54
  -5   7  18    0.77    1.61
  -5   7  18   -1.35    1.65
   5  -7 -18    1.44    1.99
  -5  -7  17    2.09    1.33
  -5   7  17    3.59    1.43
  -5   7  17    2.05    1.61
   5  -7 -17    0.43    1.95
  -5  -7  16   22.01    2.14
  -5   7  16   29.25    2.74
  -5   7  16   26.82    2.41
   5  -7 -16   20.07    4.02
  -5  -7  15   14.78    1.94
  -5   7  15   15.47    2.12
   5  -7 -15   11.96    2.91
  -5   7  15   13.22    2.12
   5  -7 -15   22.66    3.02
   5  -7 -15   11.56    1.90
  -5  -7  14    9.05    1.47
  -5   7  14    7.67    1.77
   5  -7 -14    6.14    2.00
  -5   7  14    5.89    1.67
   5  -7 -14    9.84    2.37
   5  -7 -14   10.18    2.25
  -5  -7  13   27.69    2.57
  -5   7  13   25.82    2.50
   5  -7 -13   24.08    2.93
  -5   7  13   21.92    2.29
   5  -7 -13   30.11    2.95
   5  -7 -13   33.04    2.73
  -5  -7  12    2.13    1.27
  -5   7  12    2.00    1.23
   5  -7 -12    1.93    1.53
  -5   7  12    1.85    1.31
   5  -7 -12    3.08    1.50
   5  -7 -12    3.89    1.55
   5  -7 -11    5.82    1.47
  -5  -7  11    5.75    1.45
   5  -7 -11    3.80    1.45
  -5   7  11    4.03    1.34
   5  -7 -11    7.48    1.96
   5  -7 -11    8.36    1.92
   5  -7 -10    6.90    1.96
   5  -7 -10    6.22    1.44
  -5   7  10    6.22    1.18
   5  -7 -10   11.18    1.94
   5  -7 -10    9.28    2.12
   5  -7 -10    5.48    1.50
   5  -7  -9    6.43    1.45
  -5   7   9    3.12    1.06
   5  -7  -9    2.64    1.65
   5  -7  -9    5.39    1.97
   5  -7  -9    1.65    1.73
   5  -7  -8    1.30    1.26
   5  -7  -8    1.25    1.12
   5  -7  -8    1.66    1.87
   5  -7  -8   -0.98    1.42
  -5   7   7   -1.33    2.92
   5  -7  -7    1.46    1.25
   5  -7  -7    1.75    1.62
  -5   7   7    1.31    1.23
   5  -7  -7    2.91    2.05
   5  -7  -7    2.09    1.11
  -5   7   6   21.11    3.18
   5  -7  -6   28.89    2.92
   5  -7  -6   23.89    2.35
   5  -7  -6   24.16    2.26
  -5   7   5   -0.39    2.76
   5  -7  -5   -1.00    1.64
  -5  -7   5    0.06    1.76
   5  -7  -5   -0.03    1.00
   5  -7  -5    1.21    1.32
  -5   7   4   10.99    2.33
   5  -7  -4   17.01    1.93
  -5  -7   4   16.69    2.09
   5  -7  -4   12.54    1.44
   5  -7  -4   15.46    1.73
  -5   7   3    0.44    2.74
   5  -7  -3   -0.63    1.07
  -5  -7   3    0.16    1.29
   5  -7  -3   -0.16    1.06
   5  -7  -3    1.40    0.95
  -5   7   2   12.59    2.42
   5  -7  -2   13.08    1.85
  -5  -7   2   13.62    1.71
   5  -7  -2   11.67    1.62
   5  -7  -2   11.86    1.46
  -5   7   1   16.89    2.73
   5  -7  -1   15.29    1.73
  -5  -7   1   19.26    2.06
   5  -7  -1   10.81    1.30
  -5  -7   1   16.66    2.14
   5  -7  -1   16.06    1.87
  -5   7   0   10.32    2.47
   5  -7   0   12.16    1.42
  -5  -7   0   13.83    1.69
   5  -7   0    8.87    1.40
  -5  -7   0    5.78    1.50
   5  -7   1    0.82    2.74
   5  -7   1    2.16    1.04
  -5  -7  -1    0.84    1.58
   5  -7   1    1.96    1.02
  -5  -7  -1    2.02    1.93
   5  -7   2    6.91    2.34
   5  -7   2    4.44    1.52
  -5  -7  -2    8.77    1.60
   5  -7   2    7.45    1.50
  -5  -7  -2    9.98    2.84
  -5  -7  -2    9.77    2.12
   5  -7   3    5.24    2.29
   5  -7   3    5.11    1.43
  -5  -7  -3    6.14    2.08
   5  -7   3    7.78    1.37
  -5  -7  -3    4.85    1.75
  -5  -7  -3    7.79    1.95
   5  -7   4    6.16    2.44
   5  -7   4    7.54    1.54
  -5  -7  -4    8.16    1.65
   5  -7   4    4.99    1.10
  -5  -7  -4    9.27    2.42
   5  -7   5   18.75    1.86
  -5  -7  -5   22.00    2.40
   5  -7   5   19.14    1.85
   5  -7   5   21.83    2.58
  -5  -7  -5   24.55    3.39
   5  -7   6   10.74    1.47
  -5  -7  -6   12.50    2.09
   5  -7   6   13.79    1.68
   5  -7   6    4.71    1.99
[truncated: 681,590 more chars]
